# Supplementary material for: Heterogeneous trace element deposition from an effusive volcanic plume
Source: Research Square preprint supplement (doi:10.21203/rs.3.rs-6665526/v1), 2025-05-28
Supplement: Supplementary file 2 [file 7ae66934c8562fb33708cfb8.xlsx]

## Sheet: 1 Sheet Overview
Sheet Name	Description
2 FP Raw Trace Element Data	Trace Element data (µg/m3) from ICP-QQQ analysis for all filter pack samples. Non-ash corrected.
3 SKC Size Distribution	Trace Element data (µg/m3) from SKC Impactor Sample S_M_SKC1, collected within 80 m of the vent at the Fagradalsjall 2021 eruption.
4 WAF, Emanation and Solubility	Emanation Coefficients for the Fagradalsfjall 2021 and 2022 eruptions. Calculated using at-vent filter pack PM samples as outlined in Methods M7. Water solubility is a measure of the percentage of that element found in the water-soluble component of the total extraction (see Methods M1). WAF is a measure of the proportion of the element on the filter that is derived from silicate ash rather than …
5 Snow Sample Trace Element Data	Trace Element data (ppb) from ICP-QQQ analysis for all snow samples.
6 Groundmass Trace Element Data	Trace Element concentrations (ppm) analysed by LA-ICP-MS (on Agilent 8800 ICP-QQQ-MS) at the Open University.
7 Groundmass Major Element Data	Major Elements analyzed by a JEOL JXA-8230 SuperProbe electron probe micro-analyzer (EPMA) at the Institute of Earth Sciences, University of Iceland. Used for ash compositions in WAF correction
8 MultiGAS 2021	Raw MultiGAS data for samples from 2021.
9 MultiGAS 2022	Raw MultiGAS data for samples from 2022.

## Sheet: 2 FP Raw Trace Element Data
Sheet S2: Trace Element data (µg/m3) from ICP-QQQ analysis at the Open University for all filter pack samples. Non-ash corrected.
Sample ID	µg/m3
2021	Distance From Crater	Mg	Ca	K	Ba	Sr	Al	P	Na	S	Li	Ti	V	Cr	Mn	Fe	Co	Ni	Cu	Zn	As	Se	Mo	Sn	Sb	Cs	Pb	Zr	La	Ce	Pr	Nd	Sm	Eu	Gd	Tb	Dy	Ho	Er	Yb	Lu	Sc	U	Ta	Ag	Cd	Te	Ge	Au
GD-4	< 100 m	5.51714	23.6365	87.0002	0.111658	0.0758755	7.9862	2.03877	42.8639	559.623	0.00782413	0.614784	0.0486368	0.0382209	0.168902	9.89046	0.0149958	0.205789	2.02423	3.68647	0.21202	17.6303	0	0.430546	0.0116193	0.000890671	0.74865	0.0732413	0.000784352	0.00175115	0.000194728	0.00110902	0.000282183	0.000127158	0.000410776	5.92894e-05	0.000353687	0.000107755	0.000249308	0	0	0.00274283	2.98392e-05	0	0.0488477	2.24057	3.56258	0.61247	0.00361016
GD-12	< 100 m	6.19765	9.8684	17.3542	0.00648821	0.017311	9.61667	0.0890175	56.947	478.543	0.012923	0.846546	0.0580511	0.0421867	0.195005	14.5296	0.00785502	0.0415889	3.0734	3.0439	0.484879	12.9473	0.0133094	0.639513	0.00481578	0.00293628	1.1052	0.00016715	0.00106441	0.0023268	0.000316313	0.00145666	0.000405767	0.000124148	0.000469472	7.68312e-05	0.000480107	9.42924e-05	0.000285719	0.000256215	3.89787e-05	0.0034016	4.84729e-05	0.00532074	0.0403503	1.87047	2.4154	0.596632	0.00363758
GD-SKC1_S1	< 100 m	0.109196	2.77969	0.0625941	0.0255388	0.00355623	0.702642	0.00768709	0.234874	1.37626	0.000640432	0.0891071	0.00318893	0.000657446	0.0108105	0.671708	0.000367089	0	0.0200646	0.0383131	0.00382573	0.0125973	0	0.0129197	0.000195004	0	0.00528193	0	7.17063e-05	0.000132468	2.24654e-05	7.7769e-05	1.57864e-05	5.46952e-06	3.75618e-05	1.35627e-06	4.41425e-05	1.9481e-06	2.22867e-05	8.81522e-06	7.1222e-06	6.48549e-05	0	0.000448739	5.32042e-05	0.00636234	0.006165	0.0123005	0
GD-SKC1_S2	< 100 m	0.315726	1.16642	0.126583	0.000438396	0.0016538	0.873829	0	0.497011	2.93346	0.000528341	0.0766869	0.00412494	0.00540922	0.0166792	1.14243	0.000505306	0	0.0347955	0.0604111	0.00350178	0.0208035	0	0.0354172	0	0	0.00726146	0	8.43698e-05	0.00015071	2.29006e-05	0.00012045	2.3359e-06	9.0817e-06	2.58569e-05	5.03361e-06	6.75512e-05	8.90838e-06	3.02217e-05	0.000133669	0	0.000285457	0	0	0.000268775	0.0145103	0.0139501	0.0329428	0
GD-SKC1_S3	< 100 m	0.0504895	2.5621	0.082721	0.000391221	0.00267506	0.446412	0.00552461	0.447888	2.76235	0.000511769	0.0423162	0.00249225	0.00471078	0.00838954	0.599281	0.000290401	0	0.0220185	0.0461461	0.0021468	0.0266556	0	0.0212355	0	4.81089e-06	0.00641063	0	3.60393e-05	8.749e-05	1.72498e-05	6.82857e-05	4.97706e-06	1.07958e-05	7.49256e-06	6.11201e-06	2.6224e-05	6.33942e-06	2.36778e-05	0	3.02496e-06	0.000162013	0	0.000533432	0.000215775	0.0111285	0.0159688	0.023794	0
GD-SKC1_S4	< 100 m	0	2.52091	0.147161	0.0100455	0.00599116	0.077357	0	0.890168	13.4703	0.000599044	0.00815843	0.00158292	0.0016399	0.00255879	0.166943	5.31735e-05	0.000257791	0.03741	0.0326071	0.00490745	0.258891	0	0.0214141	0.000140892	6.86017e-06	0.0150647	0	7.63216e-06	1.01217e-05	0	1.07225e-05	0	3.61555e-06	1.05141e-05	6.18575e-07	1.97367e-05	2.69029e-06	2.01811e-05	4.7739e-06	0	2.49964e-05	0	0	0.000670993	0.0463782	0.0679708	0.0155443	0
GD-SKC1_S5	< 100 m	0	1.35662	8.42854	0.00311962	0.0169088	0.334795	0	35.1517	551.798	0.00674335	0.000486938	0.0196904	0.0766068	0.00506858	3.31715	0.00198777	0.0081715	2.09027	2.15141	0.206358	16.0334	0.0084813	0.533736	0.00345273	0.00142643	0.789469	0	0	0	0	0	0	0	0	0	0	1.13978e-06	7.98912e-06	0	0	0	0	0	0.011757	1.87708	3.4652	0.497936	3.34173e-05
2022	µg/m3
ME-1	< 100 m	37.6694	56.5993	48.6916	0.143026	0.155204	103.219	1.44121	136.543	705.61	0.0400206	17.0994	0.462099	0.300962	2.33381	143.703	0.0725024	0.127095	7.36282	3.26273	0.290355	16.3176	0.0314035	0.643559	0.00822557	0.00913412	1.30866	0.174301	0.0199656	0.0488643	0.00623393	0.02759	0.00647481	0.00209535	0.00685348	0.00111235	0.00698416	0.00240183	0.00384306	0.00362073	0.000504717	0.0463743	0.000632132	0.00117437	0.110877	2.29024	2.62599	0.410939	0.00668427
ME-2	< 100 m	18.4973	30.4993	44.85	0.133777	0.0974993	70.9364	0.808051	143.16	701.571	0.0404251	9.3638	0.252857	0.12734	1.34914	84.1205	0.0439718	0.0677983	8.37207	3.74876	0.0998382	12.5345	0.00442631	0.254696	0.00767724	0.0091698	1.25254	0.0994466	0.0159729	0.0355128	0.00488915	0.0213221	0.0047687	0.00163855	0.00529973	0.000825871	0.00380243	0.00232168	0.00277309	0.00257499	0.000361685	0.0266769	0.000567497	0.00022735	0.0764547	2.30772	1.53065	0.319667	0.000849573
ME-3	500 m (airborne)	1.3573	1.74402	5.66248	0.00663462	0.00535633	7.0131	0.404062	18.0053	77.1241	0.00517376	0.590383	0.0171152	0.00765144	0.111595	6.20311	0.00377018	0.00559255	1.27018	0.331201	0.0396327	1.41763	0	0.0467936	0.00103238	0.00135543	0.127185	0.0145565	0.00133385	0.00328776	0.000413712	0.00173236	0.000427725	0.000150352	0.000472016	7.52754e-05	0.00032319	0.000162868	0.000224721	0.000125191	1.12909e-05	0.00177129	0.000123619	0	0.0241303	0.241914	0.202958	0.0427233	0.000490385
[truncated: 9 more columns]

## Sheet: 3 SKC Size Distribution
Sheet S3: Trace Element data (µg/m3) from SKC Impactor Sample GD-SKC1, collected within 80 m of the vent at the Fagradalsjall 2021 eruption.
Elements	Stage 1	Stage 2	Stage 3	Stage 4	Stage 5	Total	Average Particle Diameter um		Stage 1	> 2.5 µm
Mn	0.0108105	0.0166792	0.00838954	0.00255879	0.00506858	0.0435066	1.11569		Stage 2	1 - 2.5 µm
Ti	0.0891071	0.0766869	0.0423162	0.00815843	0.000486938	0.216756	1.48855		Stage 3	0.5 - 1 µm
Sm	1.57864e-05	2.3359e-06	4.97706e-06	0	0	2.30993e-05	1.91739		Stage 4	0.25 - 0.5 µm
Nd	7.7769e-05	0.00012045	6.82857e-05	1.07225e-05	0	0.000277227	1.26862		Stage 5	< 0.25 µm
Ce	0.000132468	0.00015071	8.749e-05	1.01217e-05	0	0.00038079	1.387
Fe	0.671708	1.14243	0.599281	0.166943	3.31715	5.89752	0.53634
La	7.17063e-05	8.43698e-05	3.60393e-05	7.63216e-06	0	0.000199748	1.41961
Ga	0.000520694	0.00132982	0.00090254	0.000429954	0.0143703	0.0175534	0.181749
Li	0.000640432	0.000528341	0.000511769	0.000599044	0.00674335	0.00902294	0.280958
Na	0.234874	0.497011	0.447888	0.890168	35.1517	37.2216	0.0411234
K	0.0625941	0.126583	0.082721	0.147161	8.42854	8.8476	0.0408268
Cu	0.0200646	0.0347955	0.0220185	0.0374101	2.09027	2.20456	0.0477731
Rb	0.000369176	0.000861668	0.000711142	0.000921863	0.0371685	0.0400324	0.0592182
Cs	0	0	4.81089e-06	6.86017e-06	0.00142643	0.0014381	0.00286523
Zn	0.0383131	0.0604111	0.0461461	0.0326071	2.15141	2.32888	0.0804757
Sb	0.000195004	0	0	0.000140892	0.00345273	0.00378862	0.137974
Ge	0.0123005	0.0329428	0.023794	0.0155443	0.497936	0.582517	0.136437
Ag	5.32042e-05	0.000268775	0.000215775	0.000670993	0.011757	0.0129657	0.0522471
Sn	0.0129197	0.0354172	0.0212355	0.0214141	0.533736	0.624723	0.13396
Pb	0.00528193	0.00726146	0.00641063	0.0150647	0.789469	0.823488	0.033319
Tl	0.000120126	0.000295686	0.000289852	0.000719589	0.0390684	0.0404937	0.0227399
As	0.00382572	0.00350178	0.00214679	0.00490745	0.206358	0.22074	0.069613
Cd	0.00636234	0.0145103	0.0111285	0.0463782	1.87708	1.95546	0.0243292
Se	0.0125973	0.0208035	0.0266556	0.258891	16.0334	16.3524	0.00797115
Te	0.006165	0.0139501	0.0159688	0.0679708	3.4652	3.56925	0.0152244
S	1.37626	2.93346	2.76235	13.4703	551.798	572.34	0.019434

## Sheet: 4 WAF Emanation and Solubility
Sheet S4: Emanation Coefficients (%) for the Fagradalsfjall 2021 and 2022 eruptions. Calculated using at-vent filter pack PM samples as outlined in Methods M7. Water solubility is a measure of the percentage of that element found in the water-soluble component of the total extraction (see Methods M1). WAF is a measure of the proportion of the element on the filter that is derived from silicate as…
Elements	Emanation Avg 2021	Emanation Range 2021 (+/-)	Emanation Avg 2022	Emanation Range 2022 (+/-)		Water Solubility 2021	Water Solubility Range 2021 (+/-)	Water Solubility 2022	Water Solubility Range 2022 (+/-)		Mean WAF 2021	Max WAF 2021	Min WAF 2021
Sm	7.85297e-06	4.81038e-06	0.000361271	2.4309e-05		17.1605	22.6938	27.784	8.63581		87.5601	103.632	71.4882
Nd	1.45955e-05	3.63914e-06	0.000434855	1.0066e-05		24.1344	13.0767	25.0218	6.88066		84.9006	100.484	69.3169
Ce	2.18938e-05	4.96881e-06	0.000410122	5.63107e-05		23.8234	14.0458	21.604	6.28999		79.44	94.0214	64.8586
V	2.78111e-05	2.56312e-06	3.10973e-05	4.12413e-05		44.4625	2.17935	14.9131	3.04356		78.8766	93.3546	64.3986
Fe	1.93058e-05	7.23047e-06	6.56751e-05	2.93225e-05		34.2846	9.5441	17.01	4.07798		78.4593	92.8606	64.0579
La	2.61722e-05	6.29122e-06	0.000402573	3.28548e-05		24.0041	12.547	26.8301	8.5076		76.0398	89.997	62.0825
Ga	0.000841161	0.000156766				49.2103	3.0608	37.9603	6.48739		9.62599	11.3929	7.85912
Li	0.0015497	0.000314808	0.00429678	0.000147363		62.1617	2.65533	61.9002	10.9566		5.34197	6.3225	4.36144
Na	0.00253934	0.000379654	0.00310952	0.000107974		72.1799	8.4414	69.1743	12.9889		3.59439	4.25415	2.93463
K	0.0200961	0.00569941	0.00724128	0.00115757		36.4323	42.2097	70.0823	14.2917		1.3943	1.65023	1.13837
Cu	0.0108907	0.00195608	0.0283609	0.000835867		76.5017	10.3455	76.5273	10.0687		0.823895	0.975123	0.672667
Rb	0.00981253	0.00283478				70.5669	4.64109	73.9348	11.5843		0.788026	0.93267	0.643382
Cs	0.014603	0.00471298	0.0473736	0.00479675		78.1493	15.3152	75.7806	12.6057		0.509117	0.602567	0.415668
Zn	0.0233896	0.000692464	0.0171131	0.000826473		70.0349	5.12215	61.9244	6.93352		0.493868	0.584519	0.403217
Sb	0.0568618	0.00762796	0.139734	0.0248438		33.7023	22.1016	49.2019	15.4177		0.294616	0.348693	0.240538
Ge	0.279764	0.0212012				59.8831	22.2065	58.7843	12.7729		0.0380388	0.0450209	0.0310567
Ag	0.468298	0.0165768	1.00188	0.470149		91.7821	1.44054	87.37	2.92644		0.0243981	0.0288764	0.0199197
Sn	0.513572	0.0890302	0.301306	0.286949		13.9655	8.73934	7.59093	3.31936		0.0176566	0.0208975	0.0144157
Pb	1.34568	0.230127	0.850566	0.130314		79.9204	19.2672	73.4154	10.8122		0.00668695	0.00791436	0.00545955
Tl	1.26095	0.367234				81.5721	19.2909	75.8113	11.4912		0.00604032	0.00714903	0.0049316
As	1.9344	0.498185	0.699763	0.737491		84.4998	13.8586	51.6582	13.7286		0.00407338	0.00482106	0.0033257
Cd	7.60722	0.266741	9.94926	0.928161		76.7894	13.0675	74.2407	11.9701		0.00138781	0.00164254	0.00113307
Se	41.6362	0.145026	32.2036	8.15552		74.8722	13.834	59.7186	12.9811		0.00017036	0.00020163	0.00013909
Te	95.5616	0.0593733	91.0243	5.1812		69.5736	27.007	45.6993	9.36189		5.87253e-06	6.95044e-06	4.79461e-06

## Sheet: 5 Snow Sample Data
Sheet S5: Trace Element data (ppb) from ICP-QQQ analysis for all snow samples.
Elements	Distance (m)	pH	S	Cl	Li	Na	Mg	Al	S	K	Ca	Sc	Ti	V	Cr	Mn	Fe	Co	Ni	Cu	Zn	Ga	Ge	As	Se	Rb	Sr	Y	Cd	Sn	Sb	Te	Cs	Ba	La	Ce	Nd	Sm	Tl	Pb	Ag
S-01	79	2.93	16.7728	93.5538	1.85075	7870.47	3864.88	19495.4	5121.35	617.641	5383.28	7.61748	1956.34	57.7086	33.1393	348.438	17145.4	9.97263	15.6446	59.4086	29.9735	3.43079	0.5456	1.16185	6.08476	0.898539	21.2296	6.70809	1.01628	0.189944	0.0729549	0.572578	0.0287236	18.8154	3.00772	6.69803	3.95787	0.996044	0.480378	1.60462	0.00796974
S-02	420	3.48	7.32047	6.64474	0.137811	1136.52	395.763	1524.64	2171.23	97.1073	526.45	0.627104	128.75	2.51166	3.00464	36.5561	1415.01	0.987226	1.32169	7.0134	3.49715	0.234315	0.0871879	0.0716744	1.29874	0.0948139	2.40514	0.656094	0.161945		0.00727066	0.199813	0.00196159	1.89257	0.315604	0.682389	0.391649	0.0984543	0.0475502	0.487493	0.00220043
S-03	758	3.91	2.6116	4.44716	0.052136	875.497	230.506	441.422	670.641	66.7216	197.951	0.180424	40.8363	1.07225	0.919623	8.81346	412.177	0.247713	0.40031	2.17198	1.44284	0.0764808	0.0437357	0.152837	1.16859	0.0485415	1.64493	0.165813	0.117707		0.00501458	0.164333	0.00183282	0.671448	0.079249	0.189409	0.10806	0.0256671	0.0200476	0.142469	0.00104153
S-04	1194	4.25	8.46206	10.0228	0.132085	2786.66	429.648	3161.42	2499.77	161.63	340.391	0.814305	1.41205	0.0218061	1.93212	46.3742	234.593	1.474	1.24284	5.43063	4.48314	0.0301917	0.0536403	0.0107604	0.156933	0.104141	4.72296	1.36268	0.118006		0.00157099	0.0710764	0.00247565	4.303	0.702227	1.00928	0.749222	0.172718	0.0151672	0.0959656	0.00754448
S-05	1568	4.4	3.77534	4.26754	0.0519689	1905.06	259.095	410.515	1115.27	112.02	166.422	0.122259	0.637402	0.0067241	0.574814	7.14765	83.9964	0.201756	0.380514	1.16828	1.70801	0.00481467	0.0160879	0.0061665	0.178129	0.0649915	1.92337	0.165756	0.0669831		0.00431604	0.0522805	0.000759209	0.712485	0.0792626	0.172767	0.108755	0.0242061	0.0071071	0.0685032
MQ Blank						< 0.025	< 0.001	< 0.001		< 0.001	< 0.005						< 0.001
Suprapur Blank						< 0.025	< 0.001	< 0.001		< 0.001	< 0.005						< 0.001

## Sheet: 6 Groundmass Trace Element
Sheet S6: Glass trace Element concentrations (ppm) analysed by LA-ICP-MS (on Agilent 8800 ICP-QQQ-MS) at the Open University.
Sample ID	Eruption Year	Li_ppm_m7	Be_ppm_m9	Na_ppm_m23	Mg_ppm_m24	Al_ppm_m27	Si_ppm_m29	P_ppm_m31	K_ppm_m39	Ca_ppm_m43	Sc_ppm_m45	Ti_ppm_m49	V_ppm_m51	Cr_ppm_m53	Mn_ppm_m55	Fe_ppm_m56	Co_ppm_m59	Ni_ppm_m60	Cu_ppm_m65	Zn_ppm_m66	Ga_ppm_m71	Ge_ppm_m72	Rb_ppm_m85	Sr_ppm_m88	Y_ppm_m89	Zr_ppm_m90	Nb_ppm_m93	Mo_ppm_m95	Cd_ppm_m111	In_ppm_m115	Sn_ppm_m118	Sb_ppm_m121	Cs_ppm_m133	Ba_ppm_m137	La_ppm_m139	Ce_ppm_m140	Pr_ppm_m141	Nd_ppm_m146	Sm_ppm_m147	Eu_ppm_m153	Gd_ppm_m157	Tb_ppm_m159	Dy_ppm_m163	Ho_ppm_m165	Er_ppm_m166	Tm_ppm_m169	Yb_ppm_m172	Lu_ppm_m175	Hf_ppm_m178
5_32_G1	2021	5.16	0.39	13800	53900	145000	504000	298	1820		43.5	6310	331	349	1390	83100	44.3	90	167	105	18	2.5	4.64	136	18.7	52.8	8.83	0.66	0.26	0.24	0.91	0.13	0.136	59.2	5.7	14.3	2.08	8.5	2.24	1.04	3.2	0.45	3.25	0.74	2.11	0.273	1.79	0.323	1.6
16_1_G	2021	3.77	0.34	13100	48600	147000		340	1811	105000	39	6120	278	329	1213	64800	41	91.7	170.1	88.6	13.93	1.16	4.55	121.8	17.01	56.5	8.24	0.44	0.101	0.086	0.68	0.022	0.081	53.8	6.12	14.5	1.81	7.81	2.15	0.92	2.48	0.432	2.98	0.696	1.73	0.266	1.94	0.305	1.43
710-1a	2022	4.892	0.41	18940	68680	128540	497000	800.2	3176		47.88	8332	342.8	272.4	1410.2	97300	48.3	74.24	165.2	102.74	15.99	1.782	8.288	157.36	20.406	75.16	13.202	0.568	0.103667	0.0712	0.832	0.04	0.0988	95	9.83	22.276	2.87	12.902	3.212	1.1286	3.606	0.609	3.844	0.8186	2.35	0.3346	2.274	0.3254	2.092
719-1	2022	4.558	0.446	19866	73400	135540		793.2	3026	125580	48.22	8626	345.4	248.4	1522.4	101040	45.72	73.1	145.06	103.18	15.698	1.77	7.836	159.94	21.238	78.06	13.696	0.5804	0.1132	0.0726	0.7492	0.0245	0.0954	94.48	10.12	22.398	2.976	13.36	3.322	1.1498	3.674	0.6006	3.924	0.8408	2.39	0.3398	2.322	0.338	2.188
[truncated: 8 more columns]

## Sheet: 7 Groundmass Major Element Data
Sheet S7: Major Elements analyzed by a JEOL JXA-8230 SuperProbe electron probe micro-analyzer (EPMA) at the Institute of Earth Sciences, University of Iceland. Used for ash compositions in WAF correction
Sample ID	Eruption Year	SiO2 wt%	TiO2 wt%	Al2O3 wt%	FeO wt%	MnO wt%	MgO wt%	CaO wt%	Na2O wt%	K2O wt%	P2O5 wt%	SO3 wt%	Cl wt%
5_32_G1	2021	49.98	1.2066	14.75	10.33	0.2063	7.79	13.13	2.03	0.2207	0.1294	0.0675	0.0101
16_1_G	2021	50.24	1.2392	14.47	10.04	0.1732	7.81	13.12	1.96	0.2769	0.1272	0.0368	0.0142
710-1a	2022	49.696	1.419	14.381	10.901	0.199	7.47	13.013	1.931	0.376	0.158	0.034	0.017
719-1	2022	49.841	1.453	14.427	11.047	0.2	7.469	12.867	1.966	0.365	0.183	0.024	0.017

## Sheet: 8 MultiGAS 2021
Sheet S8: Raw MultiGAS data for samples from 2021 in ppmv.
Sample GD-4					Sample GD-12
Timestamp	SO2	H2S	CO2		Timestamp	SO2	H2S	CO2
2021-03-23 16:50:05	14.071	0.493	395.209		2021-04-13 16:56:35	2.44	-0.004	390.862
2021-03-23 16:50:06	13.389	0.513	396.244		2021-04-13 16:56:36	2.493	0	390.655
2021-03-23 16:50:07	12.306	0.529	396.037		2021-04-13 16:56:37	3.103	0.004	390.862
2021-03-23 16:50:08	10.752	0.542	412.388		2021-04-13 16:56:38	3.293	0.003	391.483
2021-03-23 16:50:09	9.145	0.55	413.216		2021-04-13 16:56:39	3.929	0.017	392.311
2021-03-23 16:50:10	7.393	0.546	413.63		2021-04-13 16:56:40	3.339	0.026	392.104
2021-03-23 16:50:11	5.661	0.539	414.251		2021-04-13 16:56:41	3.103	0.098	392.104
2021-03-23 16:50:12	4.152	0.526	412.802		2021-04-13 16:56:42	2.414	0.12	391.69
2021-03-23 16:50:13	3.306	0.512	413.009		2021-04-13 16:56:43	2.368	0.116	391.897
2021-03-23 16:50:14	2.552	0.494	413.837		2021-04-13 16:56:44	2.335	0.119	392.104
2021-03-23 16:50:15	3.07	0.479	413.63		2021-04-13 16:56:45	2.224	0.121	391.897
2021-03-23 16:50:16	7.301	0.467	411.146		2021-04-13 16:56:46	1.594	0.115	391.897
2021-03-23 16:50:17	13.822	0.467	394.381		2021-04-13 16:56:47	1.483	0.099	392.104
2021-03-23 16:50:18	17.489	0.485	395.002		2021-04-13 16:56:48	1.325	0.014	392.104
2021-03-23 16:50:19	18.998	0.519	412.181		2021-04-13 16:56:49	0.781	0.019	392.311
2021-03-23 16:50:20	17.522	0.564	397.693		2021-04-13 16:56:50	0.695	0.014	392.518
2021-03-23 16:50:21	15.586	0.695	414.251		2021-04-13 16:56:51	0.636	0.018	391.276
2021-03-23 16:50:22	12.543	0.713	413.837		2021-04-13 16:56:52	0.564	0.01	391.69
2021-03-23 16:50:23	9.965	0.724	414.044		2021-04-13 16:56:53	0.643	0.005	391.276
2021-03-23 16:50:24	9.879	0.725	413.216		2021-04-13 16:56:54	0.754	0.006	390.655
2021-03-23 16:50:25	8.338	0.722	410.939		2021-04-13 16:56:55	0.807	-0.001	390.862
2021-03-23 16:50:26	5.838	0.712	411.974		2021-04-13 16:56:56	1.463	0	391.483
2021-03-23 16:50:27	4.723	0.698	412.388		2021-04-13 16:56:57	2.198	0	390.862
2021-03-23 16:50:28	7.905	0.586	412.595		2021-04-13 16:56:58	2.375	-0.004	390.448
2021-03-23 16:50:29	12.589	0.578	413.216		2021-04-13 16:56:59	2.447	0.003	390.448
2021-03-23 16:50:30	17.548	0.59	413.837		2021-04-13 16:57:00	2.414	0.008	390.655
2021-03-23 16:50:31	28.037	0.712	419.218		2021-04-13 16:57:01	3.208	0.008	390.448
2021-03-23 16:50:32	43.059	0.863	419.011		2021-04-13 16:57:02	4.828	0.012	390.655
2021-03-23 16:50:33	46.995	1.039	438.26		2021-04-13 16:57:03	5.753	0.111	391.069
2021-03-23 16:50:34	39.766	1.22	438.467		2021-04-13 16:57:04	7.426	0.138	390.655
2021-03-23 16:50:35	41.551	1.388	440.951		2021-04-13 16:57:05	8.311	0.157	390.448
2021-03-23 16:50:36	59.072	1.56	441.571		2021-04-13 16:57:06	8.318	0.17	390.862
2021-03-23 16:50:37	75.124	1.907	441.571		2021-04-13 16:57:07	8.069	0.205	391.897
2021-03-23 16:50:38	71.746	2.238	465.788		2021-04-13 16:57:08	6.527	0.24	391.483
2021-03-23 16:50:39	57.17	2.551	465.167		2021-04-13 16:57:09	37.162	0.311	393.967
2021-03-23 16:50:40	46.241	2.738	474.895		2021-04-13 16:57:10	127.997	0.575	409.904
2021-03-23 16:50:41	39.622	2.873	475.309		2021-04-13 16:57:11	226.685	1.56	412.595
2021-03-23 16:50:42	31.232	2.889	492.488		2021-04-13 16:57:12	226.705	3.207	510.908
2021-03-23 16:50:43	31.888	2.886	494.143		2021-04-13 16:57:13	226.698	5.158	602.392
2021-03-23 16:50:44	31.258	2.878	495.592		2021-04-13 16:57:14	226.678	6.732	603.22
2021-03-23 16:50:45	25.046	2.863	498.904		2021-04-13 16:57:15	195.466	8.068	627.643
2021-03-23 16:50:46	18.25	2.743	500.974		2021-04-13 16:57:16	180.562	8.828	628.057
2021-03-23 16:50:47	14.904	2.686	496.006		2021-04-13 16:57:17	184.19	9.392	654.343
2021-03-23 16:50:48	20.979	2.545	492.074		2021-04-13 16:57:18	189.293	10.028	708.57
2021-03-23 16:50:49	39.812	2.516	471.997		2021-04-13 16:57:19	207.773	10.536	708.156
2021-03-23 16:50:50	44.555	2.529	473.032		2021-04-13 16:57:20	226.678	11.208	761.763
2021-03-23 16:50:51	44.496	2.558	473.653		2021-04-13 16:57:21	217.002	11.879	761.142
2021-03-23 16:50:52	46.182	2.683	491.867		2021-04-13 16:57:22	174.009	12.413	814.749
2021-03-23 16:50:53	46.149	2.727	475.516		2021-04-13 16:57:23	134.721	12.573	867.321
2021-03-23 16:50:54	41.852	2.847	469.72		2021-04-13 16:57:24	103.503	12.524	867.321
2021-03-23 16:50:55	38.736	2.876	446.539		2021-04-13 16:57:25	85.095	12.051	864.837
2021-03-23 16:50:56	37.254	2.887	446.746		2021-04-13 16:57:26	101.849	11.586	854.281
2021-03-23 16:50:57	38.002	2.892	466.202		2021-04-13 16:57:27	116.124	11.26	857.179
2021-03-23 16:50:58	42.312	2.9	466.616		2021-04-13 16:57:28	111.991	11.055	771.284
2021-03-23 16:50:59	43.715	3.002	468.064		2021-04-13 16:57:29	119.542	10.847	709.605
2021-03-23 16:51:00	42.148	3.037	470.548		2021-04-13 16:57:30	133.291	10.698	709.605
2021-03-23 16:51:01	44.64	3.056	470.134		2021-04-13 16:57:31	134.971	10.685	713.952
2021-03-23 16:51:02	44.922	3.147	474.688		2021-04-13 16:57:32	113.29	10.67	713.745
2021-03-23 16:51:03	48.051	3.179	473.239		2021-04-13 16:57:33	88.093	10.496	732.166
2021-03-23 16:51:04	75.177	3.201	496.213		2021-04-13 16:57:34	66.859	10.178	682.284
2021-03-23 16:51:05	107.931	3.381	517.325		2021-04-13 16:57:35	51.509	9.677	682.491
2021-03-23 16:51:06	133.429	3.846	519.187		2021-04-13 16:57:36	40.442	9.1	624.745
2021-03-23 16:51:07	144.312	4.379	547.957		2021-04-13 16:57:37	32.065	8.556	575.899
2021-03-23 16:51:08	145.972	5.137	574.864		2021-04-13 16:57:38	26.03	8.064	576.727
2021-03-23 16:51:09	136.46	5.687	576.934		2021-04-13 16:57:39	26.633	7.555	526.018
2021-03-23 16:51:10	139.805	6.229	600.529		2021-04-13 16:57:40	34.459	7.012	526.846
2021-03-23 16:51:11	123.117	6.712	611.706		2021-04-13 16:57:41	32.78	6.555	535.952
2021-03-23 16:51:12	116.203	7.101	611.292		2021-04-13 16:57:42	28.575	6.19	540.299
2021-03-23 16:51:13	148.609	7.423	651.445		2021-04-13 16:57:43	24.173	5.738	537.401
2021-03-23 16:51:14	172.198	7.899	652.894		2021-04-13 16:57:44	19.936	5.477	499.939
2021-03-23 16:51:15	150.819	8.377	664.071		2021-04-13 16:57:45	16.8	5.037	486.899
2021-03-23 16:51:16	122.513	8.698	683.112		2021-04-13 16:57:46	14.773	4.697	466.823
2021-03-23 16:51:17	110.312	8.881	683.319		2021-04-13 16:57:47	13.297	4.327	422.323
2021-03-23 16:51:18	111.971	9.01	687.666		2021-04-13 16:57:48	11.657	3.998	432.258
2021-03-23 16:51:19	132.34	9.04	688.08		2021-04-13 16:57:49	10.561	3.686	393.346
2021-03-23 16:51:20	149.507	9.208	710.64		2021-04-13 16:57:50	9.177	3.394	393.139
2021-03-23 16:51:21	166.17	9.508	733.821		2021-04-13 16:57:51	8.357	3.193	393.139
2021-03-23 16:51:22	169.653	9.893	733.821		2021-04-13 16:57:52	7.511	3.029	393.967
2021-03-23 16:51:23	146.149	10.214	713.538		2021-04-13 16:57:53	6.586	2.841	393.139
2021-03-23 16:51:24	144.273	10.491	711.261		2021-04-13 16:57:54	6.422	2.56	392.725
2021-03-23 16:51:25	172.231	10.68	711.261		2021-04-13 16:57:55	5.832	2.385	392.518
2021-03-23 16:51:26	150.472	10.894	710.847		2021-04-13 16:57:56	15.77	2.222	394.174
2021-03-23 16:51:27	118.735	11.074	710.019		2021-04-13 16:57:57	47.225	2.196	394.381
2021-03-23 16:51:28	88.926	11.05	709.812		2021-04-13 16:57:58	107.655	2.362	397.072
2021-03-23 16:51:29	69.188	10.821	685.389		2021-04-13 16:57:59	135.666	2.873	395.83
2021-03-23 16:51:30	76.948	10.392	656.619		2021-04-13 16:58:00	123.812	3.482	444.676
2021-03-23 16:51:31	98.36	10.162	656.412		2021-04-13 16:58:01	104.329	4.012	500.767
2021-03-23 16:51:32	111.952	9.902	659.931		2021-04-13 16:58:02	81.461	4.395	499.732
2021-03-23 16:51:33	110.174	9.851	659.724		2021-04-13 16:58:03	61.899	4.696	518.567
2021-03-23 16:51:34	97.874	9.691	675.454		2021-04-13 16:58:04	46.556	4.82	517.325
2021-03-23 16:51:35	92.338	9.516	654.136		2021-04-13 16:58:05	39.904	4.762	522.292
2021-03-23 16:51:36	102.243	9.36	656.205		2021-04-13 16:58:06	43.774	4.659	524.983
2021-03-23 16:51:37	119.909	9.327	630.333		2021-04-13 16:58:07	68.682	4.536	524.983
2021-03-23 16:51:38	142.495	9.343	629.299		2021-04-13 16:58:08	102.309	4.678	538.229
2021-03-23 16:51:39	166.439	9.517	634.68		2021-04-13 16:58:09	123.576	4.997	578.797
2021-03-23 16:51:40	167.35	9.885	653.101		2021-04-13 16:58:10	137.699	5.443	578.176
2021-03-23 16:51:41	170.584	10.218	650.617		2021-04-13 16:58:11	141.517	5.896	629.092
2021-03-23 16:51:42	164.733	10.549	657.654		2021-04-13 16:58:12	124.58	6.378	639.44
2021-03-23 16:51:43	137.778	10.851	661.38		2021-04-13 16:58:13	98.15	6.707	642.752
2021-03-23 16:51:44	124.98	10.914	660.345		2021-04-13 16:58:14	74.645	6.85	656.205
2021-03-23 16:51:45	109.249	10.916	682.698		2021-04-13 16:58:15	55.969	6.742	656.412
2021-03-23 16:51:46	102.414	10.865	688.908		2021-04-13 16:58:16	42.292	6.577	604.047
2021-03-23 16:51:47	122.139	10.713	689.529		2021-04-13 16:58:17	32.937	6.373	552.924
2021-03-23 16:51:48	158.521	10.704	703.189		2021-04-13 16:58:18	26.509	6.035	552.511
2021-03-23 16:51:49	220.847	10.91	704.638		2021-04-13 16:58:19	21.602	5.667	551.062
2021-03-23 16:51:50	203.266	11.419	707.121		2021-04-13 16:58:20	17.449	5.329	548.578
2021-03-23 16:51:51	160.364	11.883	710.226		2021-04-13 16:58:21	14.871	4.98	549.82
2021-03-23 16:51:52	129.893	12.053	710.64		2021-04-13 16:58:22	13.284	4.622	542.576
2021-03-23 16:51:53	109.853	12.043	719.333		2021-04-13 16:58:23	12.372	4.174	545.473
2021-03-23 16:51:54	111.893	11.891	709.191		2021-04-13 16:58:24	11.657	3.847	526.639
2021-03-23 16:51:55	124.698	11.726	708.57		2021-04-13 16:58:25	11.559	3.534	469.306
2021-03-23 16:51:56	145.867	11.592	685.182		2021-04-13 16:58:26	11.48	3.316	469.72
2021-03-23 16:51:57	159.747	11.692	686.217		2021-04-13 16:58:27	11.486	3.167	424.392
2021-03-23 16:51:58	150.314	11.739	687.045		2021-04-13 16:58:28	11.506	2.883	417.355
2021-03-23 16:51:59	144.358	11.866	690.149		2021-04-13 16:58:29	11.559	2.72	410.939
2021-03-23 16:52:00	136.637	11.877	690.563		2021-04-13 16:58:30	10.811	2.542	390.241
2021-03-23 16:52:01	135.686	11.874	707.742		2021-04-13 16:58:31	9.919	2.391	389.828
2021-03-23 16:52:02	137.411	11.865	710.433		2021-04-13 16:58:32	9.105	2.228	390.862
2021-03-23 16:52:03	132.209	11.758	710.847		2021-04-13 16:58:33	8.817	2.145	390.655
2021-03-23 16:52:04	138.578	11.732	710.019		2021-04-13 16:58:34	8.344	2.011	390.655
2021-03-23 16:52:05	168.072	11.74	709.398		2021-04-13 16:58:35	22.041	1.829	392.725
2021-03-23 16:52:06	193.767	11.908	708.363		2021-04-13 16:58:36	52.145	1.841	395.002
2021-03-23 16:52:06	175.609	12.243	711.882		2021-04-13 16:58:37	84.964	2.118	394.174
2021-03-23 16:52:07	135.371	12.443	711.675		2021-04-13 16:58:38	97.572	2.499	440.951
2021-03-23 16:52:08	138.172	12.438	730.303		2021-04-13 16:58:39	88.874	2.88	470.962
2021-03-23 16:52:09	147.782	12.429	736.098		2021-04-13 16:58:40	86.394	3.201	470.755
2021-03-23 16:52:10	133.226	12.424	735.27		2021-04-13 16:58:41	79.388	3.521	494.143
2021-03-23 16:52:11	130.424	12.386	755.347		2021-04-13 16:58:42	66.767	3.816	494.557
2021-03-23 16:52:12	157.733	12.261	755.14		2021-04-13 16:58:43	53.234	3.89	516.911
2021-03-23 16:52:13	139.904	12.273	732.993		2021-04-13 16:58:44	42.141	3.989	520.015
2021-03-23 16:52:14	137.509	12.243	712.71		2021-04-13 16:58:45	39.471	3.906	520.222
2021-03-23 16:52:15	119.653	12.186	712.503		2021-04-13 16:58:46	50.439	3.863	519.808
2021-03-23 16:52:16	92.895	11.927	710.847		2021-04-13 16:58:47	58.265	3.866	521.05
2021-03-23 16:52:17	68.374	11.603	707.328		2021-04-13 16:58:48	54.966	3.891	540.299
2021-03-23 16:52:18	50.479	11.219	707.121		2021-04-13 16:58:49	45.677	3.97	550.648
2021-03-23 16:52:19	37.87	10.668	663.036		2021-04-13 16:58:50	37.221	3.895	551.269
2021-03-23 16:52:20	30.438	10.027	662.001		2021-04-13 16:58:51	29.434	3.842	548.785
2021-03-23 16:52:21	56.081	9.349	632.196		2021-04-13 16:58:52	24.226	3.688	541.127
2021-03-23 16:52:22	97.317	8.907	608.808		2021-04-13 16:58:53	20.054	3.525	542.783
2021-03-23 16:52:23	123.13	8.729	609.015		2021-04-13 16:58:54	38.645	3.358	518.98
2021-03-23 16:52:24	134.846	8.826	603.634		2021-04-13 16:58:55	88.638	3.366	471.376
2021-03-23 16:52:25	148.484	8.92	607.773		2021-04-13 16:58:56	139.49	3.69	470.755
2021-03-23 16:52:26	140.796	9.175	607.152		2021-04-13 16:58:57	184.8	4.346	545.68
2021-03-23 16:52:27	111.985	9.352	626.401		2021-04-13 16:58:58	199.389	5.318	544.852
2021-03-23 16:52:28	93.971	9.367	604.047		2021-04-13 16:58:59	174.73	6.216	598.045
2021-03-23 16:52:29	88.028	9.34	604.255		2021-04-13 16:59:00	136.801	6.892	605.082
2021-03-23 16:52:30	75.131	9.182	582.108		2021-04-13 16:59:01	113.618	7.408	605.703
2021-03-23 16:52:31	74.199	9.004	581.073		2021-04-13 16:59:02	107.845	7.706	627.022
2021-03-23 16:52:32	94.962	8.742	582.729		2021-04-13 16:59:03	95.539	7.858	625.573
2021-03-23 16:52:33	120.211	8.698	597.217		2021-04-13 16:59:04	76.987	7.872	608.808
2021-03-23 16:52:34	140.776	8.747	596.803		2021-04-13 16:59:05	59.538	7.726	606.738
2021-03-23 16:52:35	150.885	9.004	635.508		2021-04-13 16:59:06	45.598	7.537	606.945
2021-03-23 16:52:36	155.129	9.208	634.68		2021-04-13 16:59:07	36.283	7.216	606.531
2021-03-23 16:52:37	147.513	9.517	682.284		2021-04-13 16:59:08	29.585	6.72	606.324
2021-03-23 16:52:38	131.468	9.851	683.733		2021-04-13 16:59:09	28.45	6.377	606.117
2021-03-23 16:52:39	107.812	10.005	682.491		2021-04-13 16:59:10	25.951	6.029	602.392
2021-03-23 16:52:40	80.103	9.899	681.456		2021-04-13 16:59:11	36.211	5.662	595.562
2021-03-23 16:52:41	58.213	9.682	634.266		2021-04-13 16:59:12	63.356	5.407	596.803
2021-03-23 16:52:42	42.908	9.337	634.68		2021-04-13 16:59:13	84.735	5.345	552.511
2021-03-23 16:52:43	84.164	8.89	602.392		2021-04-13 16:59:14	88.828	5.479	545.68
2021-03-23 16:52:44	189.372	8.837	652.48		2021-04-13 16:59:15	85.778	5.52	523.12
2021-03-23 16:52:45	226.705	9.209	652.273		2021-04-13 16:59:16	71.11	5.657	518.567
2021-03-23 16:52:46	226.711	10.069	704.845		2021-04-13 16:59:17	57.544	5.664	518.98
2021-03-23 16:52:47	226.705	11.067	730.096		2021-04-13 16:59:18	55.103	5.535	511.322
2021-03-23 16:52:48	225.143	11.914	730.717		2021-04-13 16:59:19	83.259	5.522	523.534
2021-03-23 16:52:49	185.22	12.682	763.005		2021-04-13 16:59:20	139.175	5.689	523.534
2021-03-23 16:52:50	154.276	13.057	763.833		2021-04-13 16:59:21	154.204	6.183	541.334
2021-03-23 16:52:51	125.557	13.203	735.684		2021-04-13 16:59:22	133.764	6.692	541.541
2021-03-23 16:52:52	100.754	13.064	711.261		2021-04-13 16:59:23	105.674	7.08	554.994
2021-03-23 16:52:53	81.363	12.754	711.468		2021-04-13 16:59:24	80.471	7.294	595.975
2021-03-23 16:52:54	84.63	12.391	707.742		2021-04-13 16:59:25	61.552	7.275	593.285
2021-03-23 16:52:55	101.705	11.891	707.949		2021-04-13 16:59:26	46.451	7.088	590.387
2021-03-23 16:52:56	124.842	11.576	688.287		2021-04-13 16:59:27	37.943	6.737	579.417
2021-03-23 16:52:57	145.912	11.421	715.401		2021-04-13 16:59:28	40.501	6.414	578.589
2021-03-23 16:52:58	158.803	11.417	723.473		2021-04-13 16:59:29	90.658	6.235	579.21
2021-03-23 16:52:59	161.387	11.554	762.798		2021-04-13 16:59:30	153.358	6.383	579.003
2021-03-23 16:53:00	168.216	11.699	737.34		2021-04-13 16:59:31	199.494	6.871	576.52
2021-03-23 16:53:01	173.792	11.873	737.961		2021-04-13 16:59:32	219.128	7.71	630.954
2021-03-23 16:53:02	151.147	12.039	713.745		2021-04-13 16:59:33	206.211	8.397	629.506
2021-03-23 16:53:03	125.557	12.065	700.912		2021-04-13 16:59:34	174.848	9.17	687.252
2021-03-23 16:53:04	107.589	12.025	698.222		2021-04-13 16:59:35	139.7	9.667	679.18
2021-03-23 16:53:05	116.183	11.864	658.068		2021-04-13 16:59:36	106.861	9.891	679.387
2021-03-23 16:53:06	145.939	11.709	658.482		2021-04-13 16:59:37	81.474	9.871	657.24
2021-03-23 16:53:07	172.244	11.714	684.561		2021-04-13 16:59:38	63.382	9.552	630.126
2021-03-23 16:53:08	214.155	11.894	707.949		2021-04-13 16:59:39	49.075	9.202	629.919
2021-03-23 16:53:09	224.907	12.39	707.949		2021-04-13 16:59:40	39.432	8.766	603.22
2021-03-23 16:53:10	200.209	12.865	733.614		2021-04-13 16:59:41	31.356	8.369	603.22
2021-03-23 16:53:11	151.449	13.114	766.938		2021-04-13 16:59:42	25.964	7.89	603.634
2021-03-23 16:53:12	141.563	13.222	765.075		2021-04-13 16:59:43	22.14	7.392	603.427
2021-03-23 16:53:13	216.661	13.243	763.005		2021-04-13 16:59:44	18.355	6.767	603.22
2021-03-23 16:53:14	226.718	13.555	762.798		2021-04-13 16:59:45	15.849	6.352	576.313
2021-03-23 16:53:15	226.705	14.031	759.693		2021-04-13 16:59:46	14.143	5.874	575.071
2021-03-23 16:53:16	226.705	14.565	790.119		2021-04-13 16:59:47	13.166	5.462	549.406
2021-03-23 16:53:17	227.577	15.374	789.912		2021-04-13 16:59:48	11.696	5.003	469.099
2021-03-23 16:53:18	233.317	16.261	833.377		2021-04-13 16:59:49	10.771	4.659	468.892
2021-03-23 16:53:19	231.913	17.557	873.944		2021-04-13 16:59:50	9.945	4.181	415.079
2021-03-23 16:53:20	226.869	18.581	890.916		2021-04-13 16:59:51	9.145	3.852	393.139
2021-03-23 16:53:21	226.783	19.228	972.672		2021-04-13 16:59:52	8.744	3.534	393.139
2021-03-23 16:53:22	227.505	19.863	972.878		2021-04-13 16:59:53	8.167	3.265	388.172
2021-03-23 16:53:23	226.718	20.522	981.365		2021-04-13 16:59:54	7.354	3.158	388.586
2021-03-23 16:53:24	226.724	20.874	1005.58		2021-04-13 16:59:55	6.573	2.873	388.586
2021-03-23 16:53:25	226.718	21.158	1006.41		2021-04-13 16:59:56	6.481	2.69	387.344
2021-03-23 16:53:26	226.698	21.233	1002.27		2021-04-13 16:59:57	19.85	2.523	388.172
2021-03-23 16:53:27	222.46	21.215	1001.44		2021-04-13 16:59:58	79.034	2.5	392.311
2021-03-23 16:53:28	226.593	21.062	1001.44		2021-04-13 16:59:59	158.442	2.855	415.699
2021-03-23 16:53:29	226.698	20.908	1015.52		2021-04-13 17:00:00	203.804	3.532	416.32
2021-03-23 16:53:30	226.698	20.849	1029.18		2021-04-13 17:00:01	207.018	4.688	473.446
2021-03-23 16:53:31	222.467	20.723	1029.18		2021-04-13 17:00:02	195.939	5.7	472.618
2021-03-23 16:53:32	176.652	20.539	977.225		2021-04-13 17:00:03	189.608	6.688	555.615
2021-03-23 16:53:33	169.778	20.173	977.018		2021-04-13 17:00:04	184.846	7.566	603.634
2021-03-23 16:53:34	210.521	19.614	926.102		2021-04-13 17:00:05	171.398	8.306	602.392
2021-03-23 16:53:35	204.401	19.38	918.444		2021-04-13 17:00:06	140.94	8.707	652.273
2021-03-23 16:53:36	193.577	19.1	891.33		2021-04-13 17:00:07	108.14	9.027	655.998
2021-03-23 16:53:37	167.147	18.865	865.251		2021-04-13 17:00:08	81.704	9.037	656.826
2021-03-23 16:53:38	154.926	18.562	865.251		2021-04-13 17:00:09	62.562	8.894	660.345
2021-03-23 16:53:39	172.998	18.099	836.895		2021-04-13 17:00:10	48.032	8.67	670.487
2021-03-23 16:53:40	188.329	17.769	809.161		2021-04-13 17:00:11	38.002	8.359	668.21
2021-03-23 16:53:41	203.601	17.591	810.816		2021-04-13 17:00:12	30.359	7.895	674.626
2021-03-23 16:53:42	195.67	17.422	811.023		2021-04-13 17:00:13	25.046	7.419	653.722
2021-03-23 16:53:43	184.872	17.249	812.886		2021-04-13 17:00:14	29.467	6.88	653.929
2021-03-23 16:53:44	162.207	17.08	813.921		2021-04-13 17:00:15	38.153	6.432	630.54
2021-03-23 16:53:45	183.094	16.881	810.402		2021-04-13 17:00:16	40.488	6.1	630.954
2021-03-23 16:53:46	188.493	16.729	808.126		2021-04-13 17:00:17	36.316	5.869	574.036
2021-03-23 16:53:47	183.868	16.583	793.016		2021-04-13 17:00:18	29.612	5.517	517.532
2021-03-23 16:53:48	176.547	16.444	811.23		2021-04-13 17:00:19	24.232	5.291	518.567
2021-03-23 16:53:49	173.786	16.387	811.644		2021-04-13 17:00:20	19.339	4.99	464.339
2021-03-23 16:53:50	174.619	16.227	815.784		2021-04-13 17:00:21	16.111	4.67	466.616
2021-03-23 16:53:51	172.434	16.05	810.609		2021-04-13 17:00:22	14.156	4.252	420.46
2021-03-23 16:53:52	160.305	15.885	811.23		2021-04-13 17:00:23	13.336	3.994	415.699
2021-03-23 16:53:53	184.058	15.716	790.119		2021-04-13 17:00:24	12.464	3.688	415.699
2021-03-23 16:53:54	215.454	15.703	790.119		2021-04-13 17:00:25	11.624	3.485	406.386
2021-03-23 16:53:55	220.066	15.849	809.989		2021-04-13 17:00:26	10.83	3.203	410.939
2021-03-23 16:53:56	226.705	16.026	814.128		2021-04-13 17:00:27	10.516	3.069	408.041
2021-03-23 16:53:57	194.771	16.236	814.749		2021-04-13 17:00:28	9.912	2.868	394.588
2021-03-23 16:53:58	173.412	16.257	791.154		2021-04-13 17:00:29	9.394	2.696	394.795
2021-03-23 16:53:59	169.817	16.226	781.012		2021-04-13 17:00:30	9.105	2.534	395.209
2021-03-23 16:54:00	203.64	16.068	766.524		2021-04-13 17:00:31	8.981	2.373	398.727
2021-03-23 16:54:01	224.94	16.095	784.117		2021-04-13 17:00:32	10.024	2.207	392.311
2021-03-23 16:54:02	226.698	16.291	788.463		2021-04-13 17:00:33	12.51	2.135	392.311
2021-03-23 16:54:03	220.991	16.553	787.221		2021-04-13 17:00:34	46.523	2.044	389.414
2021-03-23 16:54:04	223.129	16.728	811.023		2021-04-13 17:00:35	80.667	2.201	389.207
2021-03-23 16:54:05	217.586	16.886	817.233		2021-04-13 17:00:36	113.592	2.536	417.355
2021-03-23 16:54:06	203.804	16.952	817.026		2021-04-13 17:00:37	180.674	3.169	447.781
2021-03-23 16:54:07	192.514	17.051	817.233		2021-04-13 17:00:38	182.563	3.949	447.367
2021-03-23 16:54:08	184.983	16.948	817.44		2021-04-13 17:00:39	150.295	4.911	498.904
2021-03-23 16:54:09	180.746	16.893	817.44		2021-04-13 17:00:40	116.104	5.549	500.146
2021-03-23 16:54:10	173.943	16.746	813.507		2021-04-13 17:00:41	87.247	5.985	546.508
2021-03-23 16:54:11	172.198	16.58	813.3		2021-04-13 17:00:42	65.875	6.094	546.922
2021-03-23 16:54:12	185.895	16.419	811.023		2021-04-13 17:00:43	54.31	6.091	546.715
2021-03-23 16:54:13	206.297	16.384	810.195		2021-04-13 17:00:44	47.947	6.051	545.266
2021-03-23 16:54:14	210.626	16.395	835.24		2021-04-13 17:00:45	39.622	5.887	548.785
2021-03-23 16:54:15	200.38	16.414	863.181		2021-04-13 17:00:46	39.661	5.67	549.406
2021-03-23 16:54:16	179.801	16.419	864.216		2021-04-13 17:00:47	75.092	5.506	548.992
2021-03-23 16:54:17	150.196	16.276	819.509		2021-04-13 17:00:48	124.658	5.523	550.027
2021-03-23 16:54:18	137.385	16.044	790.533		2021-04-13 17:00:49	177.538	5.913	604.047
2021-03-23 16:54:19	117.915	15.707	789.705		2021-04-13 17:00:50	201.114	6.586	657.24
2021-03-23 16:54:20	117.679	15.329	761.763		2021-04-13 17:00:51	186.912	7.511	657.24
2021-03-23 16:54:21	136.473	14.759	734.028		2021-04-13 17:00:52	172.251	8.188	658.275
2021-03-23 16:54:22	154.329	14.429	734.028		2021-04-13 17:00:53	164.726	8.579	658.896
2021-03-23 16:54:23	159.629	14.223	734.856		2021-04-13 17:00:54	168.721	9.055	658.482
2021-03-23 16:54:24	151.777	14.071	735.063		2021-04-13 17:00:55	158.029	9.52	657.861
2021-03-23 16:54:25	135.784	13.905	735.477		2021-04-13 17:00:56	136.788	9.889	658.068
2021-03-23 16:54:26	107.786	13.7	711.882		2021-04-13 17:00:57	113.349	10.04	658.275
2021-03-23 16:54:27	81.323	13.407	712.089		2021-04-13 17:00:58	124.402	10.046	685.803
2021-03-23 16:54:28	60.791	12.904	706.708		2021-04-13 17:00:59	160.581	10.178	686.217
2021-03-23 16:54:29	44.752	12.257	706.915		2021-04-13 17:01:00	196.011	10.419	709.191
2021-03-23 16:54:30	52.224	11.561	654.136		2021-04-13 17:01:01	217.37	10.87	766.11
2021-03-23 16:54:31	77.525	10.909	597.838		2021-04-13 17:01:02	223.923	11.419	765.282
2021-03-23 16:54:32	79.31	10.516	597.217		2021-04-13 17:01:03	226.672	12.048	841.449
2021-03-23 16:54:33	69.161	10.156	603.427		2021-04-13 17:01:04	226.698	12.842	841.449
2021-03-23 16:54:34	54.146	9.662	604.047		2021-04-13 17:01:05	226.698	13.554	862.767
2021-03-23 16:54:35	52.086	9.183	603.841		2021-04-13 17:01:06	226.698	14.389	873.944
2021-03-23 16:54:36	93.079	8.831	598.459		2021-04-13 17:01:07	226.685	15.228	873.116
2021-03-23 16:54:37	119.607	8.668	581.28		2021-04-13 17:01:08	214.254	15.83	888.846
2021-03-23 16:54:38	117.823	8.664	581.487		2021-04-13 17:01:09	172.533	16.022	887.397
2021-03-23 16:54:39	145.781	8.688	579.21		2021-04-13 17:01:10	133.167	15.95	884.914
2021-03-23 16:54:40	194.299	8.891	580.659		2021-04-13 17:01:11	101.554	15.563	842.691
2021-03-23 16:54:41	186.046	9.362	577.348		2021-04-13 17:01:12	78.017	15.036	810.816
2021-03-23 16:54:42	204.335	9.909	606.945		2021-04-13 17:01:13	61.657	14.234	810.195
2021-03-23 16:54:43	213.093	10.514	607.566		2021-04-13 17:01:14	55.713	13.544	783.082
2021-03-23 16:54:44	216.661	11.076	653.929		2021-04-13 17:01:15	103.365	12.886	759.072
2021-03-23 16:54:45	225.091	11.705	706.708		2021-04-13 17:01:16	154.198	12.531	758.658
2021-03-23 16:54:46	226.698	12.381	707.328		2021-04-13 17:01:17	154.296	12.388	733.407
2021-03-23 16:54:47	213.965	12.913	756.589		2021-04-13 17:01:18	148.169	12.357	733.614
2021-03-23 16:54:48	183.652	13.386	756.796		2021-04-13 17:01:19	125.183	12.225	710.847
2021-03-23 16:54:49	161.978	13.559	761.349		2021-04-13 17:01:20	98.228	12.02	657.447
2021-03-23 16:54:50	158.855	13.604	766.317		2021-04-13 17:01:21	76.836	11.697	657.447
2021-03-23 16:54:51	159.485	13.685	765.903		2021-04-13 17:01:22	63.487	11.23	600.529
2021-03-23 16:54:52	150.8	13.684	789.705		2021-04-13 17:01:23	60.843	10.726	599.494
2021-03-23 16:54:53	122.021	13.569	816.198		2021-04-13 17:01:24	62.306	10.326	565.55
2021-03-23 16:54:54	92.16	13.406	815.577		2021-04-13 17:01:25	54.926	9.844	542.783
2021-03-23 16:54:55	67.049	13.039	783.082		2021-04-13 17:01:26	44.89	9.231	543.404
2021-03-23 16:54:56	50.387	12.43	784.323		2021-04-13 17:01:27	37.293	8.728	538.85
2021-03-23 16:54:57	38.212	11.725	735.684		2021-04-13 17:01:28	31.409	8.357	524.569
2021-03-23 16:54:58	30.195	11.051	697.808		2021-04-13 17:01:29	26.758	7.872	524.569
2021-03-23 16:54:59	26.765	10.345	695.531		2021-04-13 17:01:30	22.691	7.379	523.327
2021-03-23 16:55:00	50.557	9.556	635.508		2021-04-13 17:01:31	21.72	6.755	523.327
2021-03-23 16:55:01	58.252	9.031	603.427		2021-04-13 17:01:32	20.526	6.373	521.464
2021-03-23 16:55:02	71.707	8.659	603.634		2021-04-13 17:01:33	30.418	5.911	469.306
2021-03-23 16:55:03	98.832	8.377	554.994		2021-04-13 17:01:34	79.506	5.674	469.927
2021-03-23 16:55:04	109.315	8.298	553.131		2021-04-13 17:01:35	111.27	5.687	441.571
2021-03-23 16:55:05	93.413	8.236	553.545		2021-04-13 17:01:36	121.129	5.904	469.72
2021-03-23 16:55:06	75.531	8.199	552.718		2021-04-13 17:01:37	139.93	6.233	469.927
2021-03-23 16:55:07	69.994	8.046	552.924		2021-04-13 17:01:38	140.717	6.596	524.569
2021-03-23 16:55:08	57.373	7.876	524.569		2021-04-13 17:01:39	127.637	7.136	542.99
2021-03-23 16:55:09	43.105	7.595	473.032		2021-04-13 17:01:40	121.496	7.408	542.576
2021-03-23 16:55:10	34.689	7.339	473.032		2021-04-13 17:01:41	123.609	7.708	551.062
2021-03-23 16:55:11	64.287	6.898	495.385		2021-04-13 17:01:42	116.124	7.923	551.062
2021-03-23 16:55:12	96.628	6.733	495.178		2021-04-13 17:01:43	111.001	8.066	579.21
2021-03-23 16:55:13	106.205	6.742	503.457		2021-04-13 17:01:44	106.848	8.218	605.496
2021-03-23 16:55:14	88.854	6.872	528.915		2021-04-13 17:01:45	111.171	8.344	605.703
2021-03-23 16:55:15	75.262	6.881	530.157		2021-04-13 17:01:46	120.512	8.372	645.857
2021-03-23 16:55:16	60.883	6.861	552.304		2021-04-13 17:01:47	122.087	8.406	646.892
2021-03-23 16:55:17	57.78	6.718	550.855		2021-04-13 17:01:48	121.142	8.544	677.938
2021-03-23 16:55:18	48.084	6.56	550.234		2021-04-13 17:01:49	103.24	8.686	682.077
2021-03-23 16:55:19	38.828	6.383	547.543		2021-04-13 17:01:50	89.044	8.684	681.87
2021-03-23 16:55:20	38.034	6.089	522.292		2021-04-13 17:01:51	100.032	8.555	683.526
2021-03-23 16:55:21	32.97	5.891	524.155		2021-04-13 17:01:52	139.044	8.569	681.663
2021-03-23 16:55:22	28.772	5.656	474.481		2021-04-13 17:01:53	185.416	8.848	682.491
2021-03-23 16:55:23	25.964	5.354	472.618		2021-04-13 17:01:54	194.443	9.325	681.25
2021-03-23 16:55:24	28.575	5.06	473.239		2021-04-13 17:01:55	164.641	9.855	683.319
2021-03-23 16:55:25	60.266	4.865	470.962		2021-04-13 17:01:56	128.371	10.176	682.905
2021-03-23 16:55:25	78.332	4.847	470.548		2021-04-13 17:01:57	96.818	10.201	684.561
2021-03-23 16:55:26	75.262	4.866	475.309		2021-04-13 17:01:58	74.311	10.04	684.354
2021-03-23 16:55:27	85.555	5.003	500.974		2021-04-13 17:01:59	60.942	9.815	656.619
2021-03-23 16:55:28	89.884	5.158	500.767		2021-04-13 17:02:00	63.316	9.351	629.092
2021-03-23 16:55:29	87.096	5.317	510.081		2021-04-13 17:02:01	107.465	9.033	629.299
2021-03-23 16:55:30	82.157	5.48	503.871		2021-04-13 17:02:02	158.508	9.023	653.515
2021-03-23 16:55:31	71.792	5.528	516.29		2021-04-13 17:02:03	204.493	9.344	654.343
2021-03-23 16:55:32	65.127	5.649	518.773		2021-04-13 17:02:04	226.665	9.993	662.415
2021-03-23 16:55:33	72.592	5.657	515.048		2021-04-13 17:02:05	226.678	10.674	709.812
2021-03-23 16:55:34	89.11	5.68	521.257		2021-04-13 17:02:06	226.678	11.408	710.019
2021-03-23 16:55:35	93.007	5.744	542.99		2021-04-13 17:02:07	226.678	12.234	762.798
2021-03-23 16:55:36	89.812	5.91	532.02		2021-04-13 17:02:08	226.678	13.028	785.979
2021-03-23 16:55:37	89.104	6.06	555.822		2021-04-13 17:02:09	226.672	13.568	785.565
2021-03-23 16:55:38	94.627	6.2	571.345		2021-04-13 17:02:10	196.863	14.102	793.223
2021-03-23 16:55:39	103.975	6.356	581.694		2021-04-13 17:02:11	149.501	14.343	769.628
2021-03-23 16:55:40	99.429	6.518	605.496		2021-04-13 17:02:12	119.666	14.221	767.145
2021-03-23 16:55:41	99.101	6.589	605.496		2021-04-13 17:02:13	148.34	14.017	741.479
2021-03-23 16:55:42	130.346	6.755	607.773		2021-04-13 17:02:14	176.331	13.879	810.195
2021-03-23 16:55:43	161.256	7.218	611.085		2021-04-13 17:02:15	180.733	13.88	811.644
2021-03-23 16:55:44	170.748	7.694	615.017		2021-04-13 17:02:16	170.486	13.892	866.907
2021-03-23 16:55:45	149.337	8.137	632.817		2021-04-13 17:02:17	147.526	13.879	866.079
2021-03-23 16:55:46	122.881	8.4	652.687		2021-04-13 17:02:18	122.664	13.705	822.821
2021-03-23 16:55:47	102.092	8.67	650.617		2021-04-13 17:02:19	109.511	13.531	788.256
2021-03-23 16:55:48	84.748	8.693	652.066		2021-04-13 17:02:20	94.142	13.194	788.256
2021-03-23 16:55:49	71.884	8.661	652.894		2021-04-13 17:02:21	76.456	12.715	716.849
2021-03-23 16:55:50	67.548	8.488	652.894		2021-04-13 17:02:22	60.896	12.059	717.263
2021-03-23 16:55:51	79.592	8.364	635.094		2021-04-13 17:02:23	48.734	11.432	678.145
2021-03-23 16:55:52	96.313	8.228	635.094		2021-04-13 17:02:24	42.935	10.842	606.738
2021-03-23 16:55:53	101.423	8.205	632.403		2021-04-13 17:02:25	39.609	10.191	606.324
2021-03-23 16:55:54	95.893	8.196	631.575		2021-04-13 17:02:26	35.515	9.504	551.683
2021-03-23 16:55:55	88.244	8.165	632.403		2021-04-13 17:02:27	32.865	8.885	550.855
2021-03-23 16:55:56	76.712	8.061	632.403		2021-04-13 17:02:28	53.044	8.375	550.855
2021-03-23 16:55:57	79.257	7.933	631.161		2021-04-13 17:02:29	105.72	8.102	548.164
2021-03-23 16:55:58	78.411	7.877	608.601		2021-04-13 17:02:30	145.985	8.067	550.441
2021-03-23 16:55:59	65.153	7.728	603.013		2021-04-13 17:02:31	172.277	8.353	550.441
2021-03-23 16:56:00	49.764	7.559	602.806		2021-04-13 17:02:32	172.428	8.679	553.338
2021-03-23 16:56:01	37.267	7.306	558.72		2021-04-13 17:02:33	144.122	9.029	553.545
2021-03-23 16:56:02	27.899	6.884	528.087		2021-04-13 17:02:34	111.971	9.224	551.89
2021-03-23 16:56:03	21.726	6.543	527.673		2021-04-13 17:02:35	93.44	9.313	551.269
2021-03-23 16:56:04	17.371	6.194	522.706		2021-04-13 17:02:36	84	9.191	552.097
2021-03-23 16:56:05	14.852	5.728	498.697		2021-04-13 17:02:37	71.044	9.026	552.924
2021-03-23 16:56:06	13.474	5.372	500.767		2021-04-13 17:02:38	57.557	8.722	554.787
2021-03-23 16:56:07	12.477	5.026	469.72		2021-04-13 17:02:39	53.181	8.402	557.064
2021-03-23 16:56:08	11.611	4.691	470.134		2021-04-13 17:02:40	59.269	8.213	572.794
2021-03-23 16:56:09	10.752	4.314	446.332		2021-04-13 17:02:41	61.755	7.932	574.45
2021-03-23 16:56:10	10.955	3.998	439.502		2021-04-13 17:02:42	65.114	7.703	579.21
2021-03-23 16:56:11	18.978	3.697	439.295		2021-04-13 17:02:43	82.963	7.508	601.978
2021-03-23 16:56:12	29.546	3.516	414.251		2021-04-13 17:02:44	104.795	7.392	601.564
2021-03-23 16:56:13	37.838	3.366	414.665		2021-04-13 17:02:45	118.715	7.481	625.78
2021-03-23 16:56:14	38.559	3.34	414.044		2021-04-13 17:02:46	134.157	7.659	603.427
2021-03-23 16:56:15	36.263	3.322	396.451		2021-04-13 17:02:47	147.507	7.876	603.013
2021-03-23 16:56:16	30.235	3.219	396.658		2021-04-13 17:02:48	158.357	8.208	581.694
2021-03-23 16:56:17	24.239	3.202	411.767		2021-04-13 17:02:49	141.419	8.412	582.936
2021-03-23 16:56:18	28.608	3.187	413.63		2021-04-13 17:02:50	118.682	8.697	599.494
2021-03-23 16:56:19	47.415	3.174	413.423		2021-04-13 17:02:51	101.731	8.822	603.013
2021-03-23 16:56:20	65.927	3.189	419.425		2021-04-13 17:02:52	93	8.769	602.806
2021-03-23 16:56:21	104.775	3.327	419.632		2021-04-13 17:02:53	79.762	8.704	604.255
2021-03-23 16:56:22	148.556	3.685	442.606		2021-04-13 17:02:54	64.897	8.535	605.91
2021-03-23 16:56:23	170.388	4.327	497.041		2021-04-13 17:02:55	50.708	8.364	604.875
2021-03-23 16:56:24	170.775	5.149	495.592		2021-04-13 17:02:56	40.429	8.045	599.701
2021-03-23 16:56:25	155.923	5.778	553.752		2021-04-13 17:02:57	32.131	7.69	599.701
2021-03-23 16:56:26	132.93	6.412	579.003		2021-04-13 17:02:58	44.575	7.232	581.073
2021-03-23 16:56:27	100.872	6.885	579.003		2021-04-13 17:02:59	112.135	6.894	602.185
2021-03-23 16:56:28	72.087	7.219	603.841		2021-04-13 17:03:00	163.683	7.168	603.013
2021-03-23 16:56:29	52.702	7.232	598.666		2021-04-13 17:03:01	192.108	7.566	624.745
2021-03-23 16:56:30	68.525	7.081	594.941		2021-04-13 17:03:02	203.738	8.2	634.68
2021-03-23 16:56:31	147.926	7.09	579.003		2021-04-13 17:03:03	207.937	8.719	634.266
2021-03-23 16:56:32	207.694	7.512	578.383		2021-04-13 17:03:04	204.624	9.387	655.792
2021-03-23 16:56:33	226.698	8.178	654.136		2021-04-13 17:03:05	187.457	10.149	655.584
2021-03-23 16:56:34	226.711	8.876	711.054		2021-04-13 17:03:06	164.346	10.545	658.275
2021-03-23 16:56:35	226.711	9.885	711.054		2021-04-13 17:03:07	145.637	10.854	677.317
2021-03-23 16:56:36	226.724	10.867	761.349		2021-04-13 17:03:08	122.927	10.925	675.454
2021-03-23 16:56:37	226.711	11.888	761.97		2021-04-13 17:03:09	100.879	10.909	677.731
2021-03-23 16:56:38	226.718	12.906	815.37		2021-04-13 17:03:10	82.872	10.825	680.215
2021-03-23 16:56:39	219.797	13.575	811.851		2021-04-13 17:03:11	73.642	10.511	680.422
2021-03-23 16:56:40	179.945	14.083	812.058		2021-04-13 17:03:12	67.325	10.176	683.733
2021-03-23 16:56:41	146.227	14.347	798.191		2021-04-13 17:03:13	68.427	9.758	686.838
2021-03-23 16:56:42	119.922	14.292	786.6		2021-04-13 17:03:14	70.782	9.343	687.045
2021-03-23 16:56:43	98.989	14.056	786.807		2021-04-13 17:03:15	72.107	9.022	659.931
2021-03-23 16:56:44	98.077	13.705	782.875		2021-04-13 17:03:16	69.411	8.7	659.724
2021-03-23 16:56:45	109.63	13.402	812.058		2021-04-13 17:03:17	65.94	8.401	634.473
2021-03-23 16:56:46	128.889	13.071	811.644		2021-04-13 17:03:18	61.073	8.218	600.115
2021-03-23 16:56:47	145.014	12.884	840.621		2021-04-13 17:03:19	53.365	7.951	600.529
2021-03-23 16:56:48	140.665	12.735	841.656		2021-04-13 17:03:20	45.48	7.675	551.062
2021-03-23 16:56:49	111.932	12.577	788.049		2021-04-13 17:03:21	39.569	7.345	550.234
2021-03-23 16:56:50	82.852	12.375	736.926		2021-04-13 17:03:22	34.545	6.871	523.327
2021-03-23 16:56:51	60.765	11.874	737.133		2021-04-13 17:03:23	30.268	6.532	471.79
2021-03-23 16:56:52	43.932	11.368	683.94		2021-04-13 17:03:24	37.365	6.202	471.997
2021-03-23 16:56:53	39.629	10.806	683.112		2021-04-13 17:03:25	54.933	5.896	470.755
2021-03-23 16:56:54	66.839	10.191	607.773		2021-04-13 17:03:26	66.787	5.714	471.997
2021-03-23 16:56:55	95.631	9.729	597.01		2021-04-13 17:03:27	65.179	5.678	470.755
2021-03-23 16:56:56	106.947	9.494	597.217		2021-04-13 17:03:28	63.599	5.644	473.239
2021-03-23 16:56:57	93.131	9.343	576.106		2021-04-13 17:03:29	76.095	5.537	495.178
2021-03-23 16:56:58	96.497	9.18	579.624		2021-04-13 17:03:30	94.017	5.658	495.178
2021-03-23 16:56:59	136	9.069	580.245		2021-04-13 17:03:31	97.271	5.723	510.494
2021-03-23 16:57:00	187.056	9.218	583.557		2021-04-13 17:03:32	86.237	5.897	520.843
2021-03-23 16:57:01	226.691	9.721	630.333		2021-04-13 17:03:33	78.358	6.038	522.085
2021-03-23 16:57:02	226.711	10.498	629.919		2021-04-13 17:03:34	79.552	6.053	523.534
2021-03-23 16:57:03	226.705	11.265	661.38		2021-04-13 17:03:35	81.56	6.066	523.741
2021-03-23 16:57:04	226.698	12.198	685.803		2021-04-13 17:03:36	88.06	6.185	525.604
2021-03-23 16:57:05	181.428	12.891	685.182		2021-04-13 17:03:37	78.339	6.217	543.197
2021-03-23 16:57:06	136.322	13.22	705.673		2021-04-13 17:03:38	76.135	6.218	541.541
2021-03-23 16:57:07	129.493	13.238	705.673		2021-04-13 17:03:39	109.256	6.244	549.82
2021-03-23 16:57:08	136.755	13.217	710.847		2021-04-13 17:03:40	125.308	6.42	549.82
2021-03-23 16:57:09	142.514	13.097	736.719		2021-04-13 17:03:41	109.57	6.72	571.345
2021-03-23 16:57:10	128.004	13.053	736.098		2021-04-13 17:03:42	87.89	6.887	581.487
2021-03-23 16:57:11	111.932	12.896	736.098		2021-04-13 17:03:43	67.475	6.894	580.245
2021-03-23 16:57:12	88.12	12.598	735.684		2021-04-13 17:03:44	52.23	6.854	572.587
2021-03-23 16:57:13	66.629	12.211	737.34		2021-04-13 17:03:45	40.488	6.689	552.924
2021-03-23 16:57:14	54.178	11.708	712.503		2021-04-13 17:03:46	32.098	6.389	553.338
2021-03-23 16:57:15	44.962	11.17	712.71		2021-04-13 17:03:47	25.99	6.07	528.708
2021-03-23 16:57:16	37.149	10.535	707.328		2021-04-13 17:03:48	21.726	5.729	494.971
2021-03-23 16:57:17	32.826	10	633.852		2021-04-13 17:03:49	18.197	5.47	493.522
2021-03-23 16:57:18	32.924	9.258	634.473		2021-04-13 17:03:50	15.875	5.144	470.755
2021-03-23 16:57:19	32.085	8.702	573.829		2021-04-13 17:03:51	14.825	4.822	470.962
2021-03-23 16:57:20	28.575	8.249	530.157		2021-04-13 17:03:52	13.979	4.359	447.781
2021-03-23 16:57:21	26.049	7.743	530.157		2021-04-13 17:03:53	12.549	4.064	444.262
2021-03-23 16:57:22	31.232	7.354	476.343		2021-04-13 17:03:54	11.67	3.834	444.055
2021-03-23 16:57:23	46.549	6.86	491.867		2021-04-13 17:03:55	10.785	3.527	440.33
2021-03-23 16:57:24	116.924	6.582	475.102		2021-04-13 17:03:56	10.043	3.325	440.744
2021-03-23 16:57:25	199.54	6.745	492.281		2021-04-13 17:03:57	9.925	3.18	396.037
2021-03-23 16:57:26	226.705	7.496	493.729		2021-04-13 17:03:58	9.82	2.99	384.239
2021-03-23 16:57:27	226.718	8.386	552.304		2021-04-13 17:03:59	9.105	2.814	385.481
2021-03-23 16:57:28	226.724	9.526	606.117		2021-04-13 17:04:00	8.718	2.64	383.204
2021-03-23 16:57:29	226.705	10.689	606.738		2021-04-13 17:04:01	8.147	2.481	369.751
2021-03-23 16:57:30	222.198	11.557	654.757		2021-04-13 17:04:02	7.327	2.336	368.509
2021-03-23 16:57:31	220.191	12.281	654.964		2021-04-13 17:04:03	6.586	2.188	370.579
2021-03-23 16:57:32	224.868	12.918	688.908		2021-04-13 17:04:04	6.455	2.032	369.337
2021-03-23 16:57:33	225.091	13.531	732.373		2021-04-13 17:04:05	5.806	1.867	369.13
2021-03-23 16:57:34	224.054	13.891	733.821		2021-04-13 17:04:06	5.74	1.7	373.683
2021-03-23 16:57:35	224.061	14.368	787.635		2021-04-13 17:04:07	5.661	1.556	369.337
2021-03-23 16:57:36	210.521	14.752	837.723		2021-04-13 17:04:08	5.517	1.525	367.888
2021-03-23 16:57:37	195.925	15.185	838.965		2021-04-13 17:04:09	5.484	1.386	367.06
2021-03-23 16:57:38	184.865	15.347	890.502		2021-04-13 17:04:10	10.798	1.356	367.267
2021-03-23 16:57:39	200.176	15.395	923.618		2021-04-13 17:04:11	15.796	1.334	367.681
2021-03-23 16:57:40	224.212	15.55	924.239		2021-04-13 17:04:12	27.886	1.254	389.414
2021-03-23 16:57:41	226.705	15.85	954.251		2021-04-13 17:04:13	49.737	1.373	390.034
2021-03-23 16:57:42	226.705	16.226	955.493		2021-04-13 17:04:14	76.003	1.564	398.934
2021-03-23 16:57:43	226.698	16.586	922.583		2021-04-13 17:04:15	89.707	2.04	396.865
2021-03-23 16:57:44	224.966	16.907	890.916		2021-04-13 17:04:16	80.628	2.464	423.151
2021-03-23 16:57:45	200.898	17.084	890.709		2021-04-13 17:04:17	65.849	2.829	446.332
2021-03-23 16:57:46	176.495	17.099	871.46		2021-04-13 17:04:18	51.253	3.021	446.332
2021-03-23 16:57:47	157.707	17.05	873.737		2021-04-13 17:04:19	39.615	3.163	447.367
2021-03-23 16:57:48	143.282	16.757	866.7		2021-04-13 17:04:20	30.477	3.184	447.574
2021-03-23 16:57:49	134.092	16.424	838.551		2021-04-13 17:04:21	24.967	3.178	447.988
2021-03-23 16:57:50	121.142	16.033	838.551		2021-04-13 17:04:22	19.982	3.136	451.092
2021-03-23 16:57:51	118.485	15.563	812.058		2021-04-13 17:04:23	16.564	3.029	448.402
2021-03-23 16:57:52	105.648	15.176	780.184		2021-04-13 17:04:24	14.117	2.874	449.23
2021-03-23 16:57:53	82.229	14.525	777.7		2021-04-13 17:04:25	12.425	2.766	446.332
2021-03-23 16:57:54	61.873	13.887	736.719		2021-04-13 17:04:26	10.785	2.673	447.367
2021-03-23 16:57:55	46.188	13.257	718.298		2021-04-13 17:04:27	9.794	2.517	446.539
2021-03-23 16:57:56	36.145	12.563	702.361		2021-04-13 17:04:28	8.902	2.357	440.951
2021-03-23 16:57:57	32.065	11.712	642.131		2021-04-13 17:04:29	8.075	2.215	441.571
2021-03-23 16:57:58	76.075	11.029	646.064		2021-04-13 17:04:30	6.73	2.073	417.769
2021-03-23 16:57:59	146.044	10.545	624.538		2021-04-13 17:04:31	6.488	1.992	392.104
2021-03-23 16:58:00	198.484	10.536	603.634		2021-04-13 17:04:32	5.792	1.78	392.518
2021-03-23 16:58:01	226.685	10.861	602.599		2021-04-13 17:04:33	9.177	1.68	368.716
2021-03-23 16:58:02	226.705	11.428	634.68		2021-04-13 17:04:34	29.867	1.555	369.544
2021-03-23 16:58:03	226.698	12.199	679.594		2021-04-13 17:04:35	81.363	1.713	392.311
2021-03-23 16:58:04	178.627	12.77	681.043		2021-04-13 17:04:36	128.83	2.2	418.183
2021-03-23 16:58:05	136.25	13.07	658.896		2021-04-13 17:04:37	158.744	2.85	418.597
2021-03-23 16:58:06	132.432	13.089	658.896		2021-04-13 17:04:38	161.899	3.527	469.306
2021-03-23 16:58:07	144.902	13.069	649.582		2021-04-13 17:04:39	157.655	4.33	483.795
2021-03-23 16:58:08	140.75	13.051	659.931		2021-04-13 17:04:40	158.324	5.166	528.708
2021-03-23 16:58:09	110.286	12.915	660.345		2021-04-13 17:04:41	167.075	5.882	574.864
2021-03-23 16:58:10	84.741	12.719	683.94		2021-04-13 17:04:42	163.145	6.542	575.692
2021-03-23 16:58:11	81.31	12.282	682.905		2021-04-13 17:04:43	163.788	7.231	621.227
2021-03-23 16:58:12	94.798	11.881	694.91		2021-04-13 17:04:44	146.149	7.836	649.996
2021-03-23 16:58:13	94.378	11.549	708.984		2021-04-13 17:04:45	116.15	8.205	649.582
2021-03-23 16:58:14	83.954	11.225	709.191		2021-04-13 17:04:46	88.185	8.36	671.936
2021-03-23 16:58:15	83.022	10.861	689.943		2021-04-13 17:04:47	66.741	8.361	676.282
2021-03-23 16:58:16	85.824	10.535	680.008		2021-04-13 17:04:48	51.351	8.193	674.005
2021-03-23 16:58:17	108.652	10.33	681.663		2021-04-13 17:04:49	40.403	7.888	678.352
2021-03-23 16:58:18	129.867	10.174	634.473		2021-04-13 17:04:50	31.96	7.564	647.719
2021-03-23 16:58:19	155.09	10.176	600.943		2021-04-13 17:04:51	25.899	7.195	648.754
2021-03-23 16:58:20	177.794	10.345	600.943		2021-04-13 17:04:52	21.667	6.702	608.808
2021-03-23 16:58:21	190.94	10.664	634.266		2021-04-13 17:04:53	17.823	6.247	608.187
2021-03-23 16:58:22	185.252	10.936	680.629		2021-04-13 17:04:54	15.724	5.875	558.927
2021-03-23 16:58:23	154.355	11.37	680.836		2021-04-13 17:04:55	14.137	5.495	520.015
2021-03-23 16:58:24	115.14	11.539	658.275		2021-04-13 17:04:56	13.244	5.149	519.601
2021-03-23 16:58:25	82.872	11.414	657.861		2021-04-13 17:04:57	11.847	4.745	462.683
2021-03-23 16:58:26	83.941	11.221	633.645		2021-04-13 17:04:58	10.804	4.333	452.127
2021-03-23 16:58:27	139.936	10.926	658.068		2021-04-13 17:04:59	10.279	4.021	417.976
2021-03-23 16:58:28	149.547	10.917	658.068		2021-04-13 17:05:00	9.84	3.714	392.932
2021-03-23 16:58:29	137.437	11.051	683.733		2021-04-13 17:05:01	9.145	3.509	392.932
2021-03-23 16:58:30	167.278	11.083	683.94		2021-04-13 17:05:02	9.079	3.221	378.858
2021-03-23 16:58:31	185.869	11.261	705.466		2021-04-13 17:05:03	9	3.158	383.411
2021-03-23 16:58:32	179.539	11.57	711.054		2021-04-13 17:05:04	8.305	2.958	372.649
2021-03-23 16:58:33	154.985	11.869	711.675		2021-04-13 17:05:05	7.767	2.775	384.653
2021-03-23 16:58:34	131.992	11.914	709.191		2021-04-13 17:05:06	6.632	2.549	373.89
2021-03-23 16:58:35	128.981	11.914	707.742		2021-04-13 17:05:07	15.606	2.477	370.579
2021-03-23 16:58:36	134.833	11.903	707.535		2021-04-13 17:05:08	52.342	2.382	372.442
2021-03-23 16:58:37	145.86	11.888	686.631		2021-04-13 17:05:09	93.63	2.539	371.614
2021-03-23 16:58:38	166.248	11.901	673.798		2021-04-13 17:05:10	127.413	3.001	418.183
2021-03-23 16:58:39	163.696	12.041	671.936		2021-04-13 17:05:11	145.224	3.496	469.306
2021-03-23 16:58:40	164.785	12.189	701.119		2021-04-13 17:05:12	145.939	4.163	468.892
2021-03-23 16:58:41	222.677	12.413	702.775		2021-04-13 17:05:13	133.514	4.86	520.636
2021-03-23 16:58:42	226.711	12.882	711.468		2021-04-13 17:05:14	115.186	5.471	550.441
2021-03-23 16:58:43	226.691	13.44	739.203		2021-04-13 17:05:15	103.384	5.759	549.82
2021-03-23 16:58:44	206.034	13.906	739.617		2021-04-13 17:05:16	94.01	6.082	570.931
2021-03-23 16:58:44	155.641	14.232	784.53		2021-04-13 17:05:17	79.349	6.345	570.31
2021-03-23 16:58:45	112.326	14.24	737.133		2021-04-13 17:05:18	66.76	6.381	577.762
2021-03-23 16:58:46	84.8	14.03	737.547		2021-04-13 17:05:19	55.956	6.383	579.831
2021-03-23 16:58:47	90.475	13.585	708.777		2021-04-13 17:05:20	45.618	6.24	579.417
2021-03-23 16:58:48	94.896	13.242	709.191		2021-04-13 17:05:21	37.903	6.066	589.559
2021-03-23 16:58:49	91.511	12.877	708.984		2021-04-13 17:05:22	31.133	5.888	593.285
2021-03-23 16:58:50	90.488	12.41	707.742		2021-04-13 17:05:23	32.885	5.658	594.113
2021-03-23 16:58:51	99.101	11.906	707.742		2021-04-13 17:05:24	36.335	5.38	596.596
2021-03-23 16:58:52	130.523	11.588	705.88		2021-04-13 17:05:25	36.244	5.189	598.045
2021-03-23 16:58:53	163.106	11.54	689.736		2021-04-13 17:05:26	35.404	5.011	550.027
2021-03-23 16:58:54	195.328	11.571	690.149		2021-04-13 17:05:27	33.954	4.84	501.388
2021-03-23 16:58:55	215.566	11.883	710.019		2021-04-13 17:05:28	31.33	4.673	497.662
2021-03-23 16:58:56	214.26	12.335	709.605		2021-04-13 17:05:29	27.893	4.381	467.237
2021-03-23 16:58:57	180.982	12.735	730.303		2021-04-13 17:05:30	24.265	4.194	441.158
2021-03-23 16:58:58	162.168	12.932	702.154		2021-04-13 17:05:31	21.576	4.033	439.502
2021-03-23 16:58:59	151.803	13.082	695.945		2021-04-13 17:05:32	19.083	3.852	419.632
2021-03-23 16:59:00	137.647	13.095	658.275		2021-04-13 17:05:33	17.318	3.676	414.872
2021-03-23 16:59:01	145.749	13.069	690.977		2021-04-13 17:05:34	15.645	3.509	413.216
2021-03-23 16:59:02	140.665	13.043	690.149		2021-04-13 17:05:35	14.819	3.336	413.63
2021-03-23 16:59:03	128.811	12.909	712.71		2021-04-13 17:05:36	14.55	3.193	408.248
2021-03-23 16:59:04	148.353	12.779	733.407		2021-04-13 17:05:37	14.163	3.127	396.451
2021-03-23 16:59:05	155.91	12.751	734.028		2021-04-13 17:05:38	14.156	2.96	409.076
2021-03-23 16:59:06	140.173	12.742	738.582		2021-04-13 17:05:39	14.064	2.838	404.523
2021-03-23 16:59:07	125.327	12.613	740.445		2021-04-13 17:05:40	13.304	2.696	404.523
2021-03-23 16:59:08	129.618	12.553	735.891		2021-04-13 17:05:41	13.31	2.542	396.865
2021-03-23 16:59:09	144.85	12.415	732.373		2021-04-13 17:05:42	14.799	2.499	392.518
2021-03-23 16:59:10	159.505	12.399	731.545		2021-04-13 17:05:43	18.309	2.374	392.104
2021-03-23 16:59:11	162.962	12.42	711.261		2021-04-13 17:05:44	18.296	2.334	391.897
2021-03-23 16:59:12	147.612	12.483	710.64		2021-04-13 17:05:45	17.482	2.229	392.104
2021-03-23 16:59:13	123.674	12.435	707.535		2021-04-13 17:05:46	15.96	2.209	392.725
2021-03-23 16:59:14	109.452	12.379	690.563		2021-04-13 17:05:47	14.845	2.187	393.139
2021-03-23 16:59:15	89.786	12.051	690.77		2021-04-13 17:05:48	13.999	2.124	392.932
2021-03-23 16:59:16	67.639	11.721	684.147		2021-04-13 17:05:49	13.166	2.045	392.725
2021-03-23 16:59:17	51.266	11.252	650.824		2021-04-13 17:05:50	16.59	2.01	392.311
2021-03-23 16:59:18	38.927	10.717	648.754		2021-04-13 17:05:51	17.476	1.983	392.725
2021-03-23 16:59:19	30.359	10.184	605.703		2021-04-13 17:05:52	17.469	1.935	393.553
2021-03-23 16:59:20	24.364	9.503	574.864		2021-04-13 17:05:53	21.786	1.875	392.932
2021-03-23 16:59:21	19.975	8.868	574.45		2021-04-13 17:05:54	21.569	1.893	393.967
2021-03-23 16:59:22	17.246	8.366	544.645		2021-04-13 17:05:55	18.25	1.894	393.967
2021-03-23 16:59:23	14.858	7.752	543.818		2021-04-13 17:05:56	17.508	1.871	399.348
2021-03-23 16:59:24	14.183	7.238	520.843		2021-04-13 17:05:57	18.453	1.863	412.181
2021-03-23 16:59:25	17.463	6.694	475.516		2021-04-13 17:05:58	17.384	1.862	406.593
2021-03-23 16:59:26	16.629	6.212	493.315		2021-04-13 17:05:59	14.904	1.833	414.251
2021-03-23 16:59:27	14.786	5.732	443.434		2021-04-13 17:06:00	13.179	1.733	413.009
2021-03-23 16:59:28	13.317	5.367	412.181		2021-04-13 17:06:01	10.929	1.711	394.174
2021-03-23 16:59:29	11.847	5.02	411.974		2021-04-13 17:06:02	9.741	1.689	391.276
2021-03-23 16:59:30	12.628	4.687	391.483		2021-04-13 17:06:03	8.331	1.573	391.897
2021-03-23 16:59:31	21.057	4.321	390.241		2021-04-13 17:06:04	7.262	1.544	390.448
2021-03-23 16:59:32	54.979	4.139	369.13		2021-04-13 17:06:05	6.547	1.515	390.862
2021-03-23 16:59:33	123.806	4.149	415.493		2021-04-13 17:06:06	6.455	1.395	391.069
2021-03-23 16:59:34	211.092	4.555	416.113		2021-04-13 17:06:07	10.529	1.374	390.448
2021-03-23 16:59:35	226.862	5.492	448.195		2021-04-13 17:06:08	15.711	1.351	390.448
2021-03-23 16:59:36	234.249	6.872	573.829		2021-04-13 17:06:09	17.417	1.362	390.448
2021-03-23 16:59:37	237.456	8.69	568.862		2021-04-13 17:06:10	16.741	1.366	390.655
2021-03-23 16:59:38	232.274	10.687	679.387		2021-04-13 17:06:11	19.896	1.371	390.655
2021-03-23 16:59:39	226.718	12.394	678.766		2021-04-13 17:06:12	26.686	1.392	390.655
2021-03-23 16:59:40	219.836	13.535	708.57		2021-04-13 17:06:13	51.305	1.535	413.423
2021-03-23 16:59:41	170.722	14.052	731.545		2021-04-13 17:06:14	79.716	1.725	414.458
2021-03-23 16:59:42	140.868	14.352	731.752		2021-04-13 17:06:15	124.494	2.272	425.427
2021-03-23 16:59:43	117.652	14.349	739.41		2021-04-13 17:06:16	155.956	2.891	422.944
2021-03-23 16:59:44	98.996	14.124	761.556		2021-04-13 17:06:17	171.142	3.606	472.618
2021-03-23 16:59:45	90.547	13.737	762.384		2021-04-13 17:06:18	210.449	4.555	547.543
2021-03-23 16:59:46	82.511	13.4	783.289		2021-04-13 17:06:19	226.665	5.667	547.75
2021-03-23 16:59:47	69.089	12.902	783.91		2021-04-13 17:06:20	225.701	6.746	604.255
2021-03-23 16:59:48	57.583	12.379	791.982		2021-04-13 17:06:21	208.068	7.899	674.626
2021-03-23 16:59:49	47.284	11.633	754.312		2021-04-13 17:06:22	196.824	8.686	675.247
2021-03-23 16:59:50	48.832	11.052	754.312		2021-04-13 17:06:23	222.362	9.375	710.019
2021-03-23 16:59:51	76.889	10.5	709.812		2021-04-13 17:06:24	226.672	10.347	710.019
2021-03-23 16:59:52	97.264	10.042	635.094		2021-04-13 17:06:25	226.672	11.236	762.591
2021-03-23 16:59:53	102.4	9.837	635.715		2021-04-13 17:06:26	226.206	12.057	814.128
2021-03-23 16:59:54	100.833	9.525	557.892		2021-04-13 17:06:27	192.914	12.737	815.163
2021-03-23 16:59:55	134.813	9.384	557.478		2021-04-13 17:06:28	173.917	13.15	867.942
2021-03-23 16:59:56	173.871	9.507	576.106		2021-04-13 17:06:29	147.474	13.246	865.458
2021-03-23 16:59:57	201.947	9.868	582.315		2021-04-13 17:06:30	117.042	13.239	865.458
2021-03-23 16:59:58	202.892	10.349	581.901		2021-04-13 17:06:31	92.967	13.052	863.388
2021-03-23 16:59:59	174.96	10.827	610.671		2021-04-13 17:06:32	75.164	12.699	792.189
2021-03-23 17:00:00	143.38	11.091	653.722		2021-04-13 17:06:33	61.65	12.063	791.982
2021-03-23 17:00:01	107.885	11.242	654.343		2021-04-13 17:06:34	49.777	11.544	738.168
2021-03-23 17:00:02	82.124	11.212	636.336		2021-04-13 17:06:35	40.599	10.873	737.754
2021-03-23 17:00:03	79.487	10.899	634.68		2021-04-13 17:06:36	34.479	10.329	686.01
2021-03-23 17:00:04	90.455	10.685	634.473		2021-04-13 17:06:37	28.719	9.546	627.643
2021-03-23 17:00:05	81.238	10.384	655.998		2021-04-13 17:06:38	25.866	8.9	627.229
2021-03-23 17:00:06	63.467	10.165	656.205		2021-04-13 17:06:39	23.366	8.374	575.278
2021-03-23 17:00:07	47.245	9.705	661.587		2021-04-13 17:06:40	20.034	7.886	574.864
2021-03-23 17:00:08	36.224	9.215	633.231		2021-04-13 17:06:41	17.495	7.377	522.499
2021-03-23 17:00:09	27.755	8.722	632.817		2021-04-13 17:06:42	15.606	6.734	463.511
2021-03-23 17:00:10	21.91	8.355	604.875		2021-04-13 17:06:43	14.084	6.276	464.96
2021-03-23 17:00:11	26.076	7.859	604.461		2021-04-13 17:06:44	12.536	5.876	417.148
2021-03-23 17:00:12	50.734	7.388	572.38		2021-04-13 17:06:45	11.598	5.486	393.967
2021-03-23 17:00:13	54.316	7.022	545.266		2021-04-13 17:06:46	10.706	5.102	393.967
2021-03-23 17:00:14	43.938	6.712	542.576		2021-04-13 17:06:47	9.886	4.696	388.172
2021-03-23 17:00:15	33.928	6.405	493.108		2021-04-13 17:06:48	12.385	4.317	387.758
2021-03-23 17:00:16	26.03	6.186	443.641		2021-04-13 17:06:49	44.634	4.042	388.172
2021-03-23 17:00:17	22.455	5.866	444.469		2021-04-13 17:06:50	96.516	4.03	387.965
2021-03-23 17:00:18	22.73	5.513	442.606		2021-04-13 17:06:51	133.39	4.345	440.744
2021-03-23 17:00:19	20.736	5.197	441.985		2021-04-13 17:06:52	151.141	4.979	440.951
2021-03-23 17:00:20	17.292	4.984	441.365		2021-04-13 17:06:53	152.656	5.51	494.971
2021-03-23 17:00:21	16.557	4.677	418.804		2021-04-13 17:06:54	199.389	6.203	496.006
2021-03-23 17:00:22	15.842	4.328	412.181		2021-04-13 17:06:55	226.665	7.188	573.415
2021-03-23 17:00:23	14.104	4.039	410.939		2021-04-13 17:06:56	226.665	8.224	633.231
2021-03-23 17:00:24	11.893	3.838	395.002		2021-04-13 17:06:57	183.389	9.036	634.266
2021-03-23 17:00:25	10.64	3.567	395.209		2021-04-13 17:06:58	136.781	9.68	647.512
2021-03-23 17:00:26	9.19	3.356	396.451		2021-04-13 17:06:59	101.79	10.007	648.133
2021-03-23 17:00:27	20.211	3.197	396.037		2021-04-13 17:07:00	77.125	10.009	653.308
2021-03-23 17:00:28	46.326	3.161	412.595		2021-04-13 17:07:01	60.148	9.819	653.722
2021-03-23 17:00:29	74.245	3.176	411.56		2021-04-13 17:07:02	47.992	9.364	653.722
2021-03-23 17:00:30	114.464	3.313	412.388		2021-04-13 17:07:03	39.51	9.006	653.929
2021-03-23 17:00:31	171.509	3.703	442.606		2021-04-13 17:07:04	32.734	8.526	652.273
2021-03-23 17:00:32	226.803	4.526	474.274		2021-04-13 17:07:05	27.873	8.178	649.375
2021-03-23 17:00:33	226.724	5.558	474.274		2021-04-13 17:07:06	24.108	7.702	644.822
2021-03-23 17:00:34	226.718	6.889	558.72		2021-04-13 17:07:07	20.008	7.216	579.21
2021-03-23 17:00:35	226.691	8.321	646.271		2021-04-13 17:07:08	17.443	6.667	579.21
2021-03-23 17:00:36	207.582	9.34	646.271		2021-04-13 17:07:09	19.037	6.214	524.362
2021-03-23 17:00:37	152.499	10.184	661.587		2021-04-13 17:07:10	18.348	5.762	525.19
2021-03-23 17:00:38	118.544	10.551	685.803		2021-04-13 17:07:11	16.57	5.482	444.676
2021-03-23 17:00:39	101.443	10.701	686.217		2021-04-13 17:07:12	14.268	5.14	388.793
2021-03-23 17:00:40	101.626	10.691	708.363		2021-04-13 17:07:13	13.264	4.813	387.965
2021-03-23 17:00:41	117.128	10.659	708.363		2021-04-13 17:07:14	11.696	4.348	387.758
2021-03-23 17:00:42	163.145	10.66	715.194		2021-04-13 17:07:15	10.732	4.059	385.895
2021-03-23 17:00:43	203.541	10.839	784.117		2021-04-13 17:07:16	9.846	3.829	381.962
2021-03-23 17:00:44	226.691	11.239	784.117		2021-04-13 17:07:17	9.059	3.522	373.269
2021-03-23 17:00:45	226.691	11.768	840.414		2021-04-13 17:07:18	8.305	3.301	370.165
2021-03-23 17:00:46	226.698	12.444	840.207		2021-04-13 17:07:19	7.905	3.179	370.786
2021-03-23 17:00:47	226.698	13.048	842.484		2021-04-13 17:07:20	6.691	3.01	371.2
2021-03-23 17:00:48	198.398	13.54	861.526		2021-04-13 17:07:21	6.547	2.836	372.028
2021-03-23 17:00:49	157.622	13.719	858.007		2021-04-13 17:07:22	6.514	2.652	369.544
2021-03-23 17:00:50	158.632	13.853	788.463		2021-04-13 17:07:23	12.162	2.508	387.137
2021-03-23 17:00:51	196.772	13.879	731.131		2021-04-13 17:07:24	35.614	2.379	386.309
2021-03-23 17:00:52	226.691	14.065	731.545		2021-04-13 17:07:25	64.215	2.486	390.862
2021-03-23 17:00:53	226.705	14.519	785.151		2021-04-13 17:07:26	74.173	2.671	402.867
2021-03-23 17:00:54	224.12	15.056	842.691		2021-04-13 17:07:27	117.856	2.992	418.804
2021-03-23 17:00:55	183.96	15.378	842.898		2021-04-13 17:07:28	162.936	3.406	447.988
2021-03-23 17:00:56	145.945	15.507	837.723		2021-04-13 17:07:29	160.535	4.18	447.16
2021-03-23 17:00:57	135.764	15.354	819.923		2021-04-13 17:07:30	183.875	5.031	524.569
2021-03-23 17:00:58	114.353	15.058	823.235		2021-04-13 17:07:31	184.99	5.897	576.106
2021-03-23 17:00:59	105.549	14.592	785.565		2021-04-13 17:07:32	150.36	6.701	576.934
2021-03-23 17:01:00	88.185	14.194	785.772		2021-04-13 17:07:33	115.297	7.329	594.113
2021-03-23 17:01:01	66.892	13.664	735.063		2021-04-13 17:07:34	116.878	7.597	587.696
2021-03-23 17:01:02	50.538	13.091	697.601		2021-04-13 17:07:35	134.111	7.879	600.943
2021-03-23 17:01:03	38.835	12.421	693.047		2021-04-13 17:07:36	123.202	8.193	630.747
2021-03-23 17:01:04	30.313	11.592	635.508		2021-04-13 17:07:37	144.673	8.37	630.54
2021-03-23 17:01:05	24.364	10.869	634.266		2021-04-13 17:07:38	190.264	8.682	660.759
2021-03-23 17:01:06	20.034	10.178	607.773		2021-04-13 17:07:39	210.331	9.214	710.64
2021-03-23 17:01:07	17.331	9.361	581.901		2021-04-13 17:07:40	210.259	10.011	711.054
2021-03-23 17:01:08	15.068	8.697	582.729		2021-04-13 17:07:41	195.309	10.548	770.249
2021-03-23 17:01:09	27.02	8.197	524.983		2021-04-13 17:07:42	171.096	11.065	769.835
2021-03-23 17:01:10	56.77	7.699	444.883		2021-04-13 17:07:43	144.017	11.375	761.349
2021-03-23 17:01:11	123.596	7.395	444.676		2021-04-13 17:07:44	126.981	11.433	751
2021-03-23 17:01:12	172.27	7.493	473.86		2021-04-13 17:07:45	128.771	11.433	755.761
2021-03-23 17:01:13	203.915	7.894	516.29		2021-04-13 17:07:46	124.553	11.411	715.814
2021-03-23 17:01:14	218.97	8.396	526.639		2021-04-13 17:07:47	125.406	11.383	707.328
2021-03-23 17:01:15	212.279	9.155	553.545		2021-04-13 17:07:48	140.573	11.278	707.328
2021-03-23 17:01:16	186.958	9.873	553.752		2021-04-13 17:07:49	162.056	11.365	728.233
2021-03-23 17:01:17	141.74	10.367	595.768		2021-04-13 17:07:50	168.138	11.519	760.728
2021-03-23 17:01:18	101.561	10.659	599.701		2021-04-13 17:07:51	162.922	11.639	760.935
2021-03-23 17:01:19	71.982	10.556	597.838		2021-04-13 17:07:52	152.695	11.759	760.107
2021-03-23 17:01:20	59.872	10.365	602.392		2021-04-13 17:07:53	149.245	11.886	760.728
2021-03-23 17:01:21	100.656	10.055	633.438		2021-04-13 17:07:54	153.627	11.905	759.279
2021-03-23 17:01:22	155.864	10.019	631.782		2021-04-13 17:07:55	145.001	11.958	713.952
2021-03-23 17:01:23	187.004	10.175	660.138		2021-04-13 17:07:56	130.792	11.966	713.331
2021-03-23 17:01:24	190.048	10.507	659.517		2021-04-13 17:07:57	138.415	11.903	704.845
2021-03-23 17:01:25	172.244	10.854	706.708		2021-04-13 17:07:58	180.674	11.906	705.052
2021-03-23 17:01:26	172.546	11.207	735.063		2021-04-13 17:07:59	222.401	12.228	712.503
2021-03-23 17:01:27	177.216	11.425	734.442		2021-04-13 17:08:00	226.665	12.728	741.686
2021-03-23 17:01:28	188.716	11.741	731.959		2021-04-13 17:08:01	214.26	13.222	741.893
2021-03-23 17:01:29	186.282	12.068	731.131		2021-04-13 17:08:02	173.943	13.544	759.693
2021-03-23 17:01:30	180.503	12.435	728.44		2021-04-13 17:08:03	135.036	13.571	763.419
2021-03-23 17:01:31	184.911	12.735	710.847		2021-04-13 17:08:04	105.051	13.537	763.419
2021-03-23 17:01:32	173.143	12.927	711.054		2021-04-13 17:08:05	83.009	13.222	713.745
2021-03-23 17:01:33	142.396	13.087	707.949		2021-04-13 17:08:06	70.165	12.744	695.738
2021-03-23 17:01:34	109.288	13.069	708.57		2021-04-13 17:08:07	63.375	12.136	693.461
2021-03-23 17:01:35	107.793	12.895	708.984		2021-04-13 17:08:08	53.877	11.562	666.14
2021-03-23 17:01:36	105.707	12.591	710.019		2021-04-13 17:08:09	50.544	10.954	665.312
2021-03-23 17:01:37	123.865	12.398	710.019		2021-04-13 17:08:10	55.084	10.415	644.822
2021-03-23 17:01:38	131.192	12.082	710.226		2021-04-13 17:08:11	86.814	10.001	648.133
2021-03-23 17:01:39	140.153	12.028	710.64		2021-04-13 17:08:12	147.612	9.687	647.926
2021-03-23 17:01:40	153.253	11.913	711.261		2021-04-13 17:08:13	172.415	9.85	643.58
2021-03-23 17:01:41	176.606	11.936	711.261		2021-04-13 17:08:14	164.739	10.045	633.852
2021-03-23 17:01:42	198.503	12.198	711.882		2021-04-13 17:08:15	150.419	10.347	628.678
2021-03-23 17:01:43	226.705	12.563	711.675		2021-04-13 17:08:16	124.803	10.504	615.224
2021-03-23 17:01:44	226.705	13.066	732.58		2021-04-13 17:08:17	105.884	10.509	622.054
2021-03-23 17:01:45	226.698	13.564	756.175		2021-04-13 17:08:18	119.437	10.383	601.15
2021-03-23 17:01:46	226.691	14.078	755.761		2021-04-13 17:08:19	145.02	10.372	580.245
2021-03-23 17:01:47	226.698	14.564	760.935		2021-04-13 17:08:20	147.697	10.518	580.659
2021-03-23 17:01:48	202.767	15.056	761.556		2021-04-13 17:08:21	126.305	10.656	605.703
2021-03-23 17:01:49	202.833	15.351	783.496		2021-04-13 17:08:22	98.753	10.651	637.578
2021-03-23 17:01:50	223.53	15.539	818.061		2021-04-13 17:08:23	75.99	10.409	639.233
2021-03-23 17:01:51	226.691	15.843	819.302		2021-04-13 17:08:24	58.252	10.163	630.54
2021-03-23 17:01:52	220.801	16.055	867.321		2021-04-13 17:08:25	45.316	9.678	629.506
2021-03-23 17:01:53	189.379	16.258	870.011		2021-04-13 17:08:26	38.776	9.177	629.299
2021-03-23 17:01:54	183.849	16.375	870.839		2021-04-13 17:08:27	47.514	8.698	603.427
2021-03-23 17:01:55	156.244	16.259	888.225		2021-04-13 17:08:28	52.342	8.362	604.255
2021-03-23 17:01:56	134.262	16.052	864.423		2021-04-13 17:08:29	48.937	8.039	580.452
2021-03-23 17:01:57	142.305	15.834	864.837		2021-04-13 17:08:30	80.517	7.719	568.655
2021-03-23 17:01:58	141.032	15.516	838.344		2021-04-13 17:08:31	141.629	7.674	567.62
2021-03-23 17:01:59	154.171	15.204	838.965		2021-04-13 17:08:32	211.42	7.99	549.406
2021-03-23 17:02:00	161.184	15.017	810.609		2021-04-13 17:08:33	214.654	8.517	548.992
2021-03-23 17:02:01	156.008	14.715	781.633		2021-04-13 17:08:34	176.803	9.162	580.245
2021-03-23 17:02:02	168.675	14.558	781.219		2021-04-13 17:08:35	155.93	9.615	607.773
2021-03-23 17:02:03	188.585	14.523	762.384		2021-04-13 17:08:36	168.977	10.032	607.98
2021-03-23 17:02:03	197.788	14.54	757.417		2021-04-13 17:08:37	198.7	10.384	629.919
2021-03-23 17:02:04	186.171	14.616	757.417		2021-04-13 17:08:38	224.776	10.882	639.854
2021-03-23 17:02:05	164.831	14.688	736.305		2021-04-13 17:08:39	219.462	11.552	643.787
2021-03-23 17:02:06	128.68	14.569	735.891		2021-04-13 17:08:40	205.155	12.059	688.494
2021-03-23 17:02:07	95.296	14.359	729.268		2021-04-13 17:08:41	198.661	12.573	734.442
2021-03-23 17:02:08	72.684	13.896	702.982		2021-04-13 17:08:42	188.67	12.917	733.614
2021-03-23 17:02:09	89.91	13.526	703.189		2021-04-13 17:08:43	156.69	13.208	743.135
2021-03-23 17:02:10	133.954	13.064	658.275		2021-04-13 17:08:44	127.066	13.216	760.728
2021-03-23 17:02:11	144.036	12.849	659.103		2021-04-13 17:08:45	113.795	13.057	760.728
2021-03-23 17:02:12	119.771	12.612	663.864		2021-04-13 17:08:46	114.458	12.861	759.693
2021-03-23 17:02:13	100.551	12.421	684.975		2021-04-13 17:08:47	111.125	12.561	758.245
2021-03-23 17:02:14	94.87	12.056	684.561		2021-04-13 17:08:48	95.545	12.237	758.245
2021-03-23 17:02:15	97.205	11.734	660.552		2021-04-13 17:08:49	76.987	11.784	756.796
2021-03-23 17:02:16	96.556	11.423	651.445		2021-04-13 17:08:50	70.473	11.381	708.57
2021-03-23 17:02:17	79.27	11.205	650.824		2021-04-13 17:08:51	79.414	10.895	658.689
2021-03-23 17:02:18	59.912	10.827	606.324		2021-04-13 17:08:52	77.591	10.527	658.482
2021-03-23 17:02:19	44.522	10.357	578.176		2021-04-13 17:08:53	73.314	10.188	633.231
2021-03-23 17:02:20	34.715	9.862	578.383		2021-04-13 17:08:54	71.779	9.845	606.324
2021-03-23 17:02:21	32.76	9.223	546.094		2021-04-13 17:08:55	81.468	9.377	606.945
2021-03-23 17:02:22	32.937	8.706	504.078		2021-04-13 17:08:56	91.406	9.166	590.387
2021-03-23 17:02:23	32.747	8.35	504.285		2021-04-13 17:08:57	88.139	8.971	558.72
2021-03-23 17:02:24	37.995	7.879	522.499		2021-04-13 17:08:58	77.611	8.72	555.201
2021-03-23 17:02:25	46.234	7.421	523.741		2021-04-13 17:08:59	66.872	8.537	548.371
2021-03-23 17:02:26	71.648	7.187	525.604		2021-04-13 17:09:00	60.902	8.366	525.397
2021-03-23 17:02:27	104.92	6.907	523.741		2021-04-13 17:09:01	61.119	8.079	526.432
2021-03-23 17:02:28	118.518	7.039	521.671		2021-04-13 17:09:02	59.308	7.872	521.671
2021-03-23 17:02:29	102.263	7.223	518.567		2021-04-13 17:09:03	51.39	7.576	521.257
2021-03-23 17:02:30	78.765	7.275	518.359		2021-04-13 17:09:04	41.557	7.354	505.527
2021-03-23 17:02:31	71.851	7.262	501.594		2021-04-13 17:09:05	34.663	6.888	498.904
2021-03-23 17:02:32	71.982	7.232	495.178		2021-04-13 17:09:06	41.301	6.563	497.455
2021-03-23 17:02:33	73.635	7.194	497.869		2021-04-13 17:09:07	48.852	6.351	495.592
2021-03-23 17:02:34	67.856	7.063	504.285		2021-04-13 17:09:08	47.415	6.06	493.108
2021-03-23 17:02:35	55.897	6.901	520.429		2021-04-13 17:09:09	44.444	5.888	491.453
2021-03-23 17:02:36	44.594	6.741	521.878		2021-04-13 17:09:10	39.491	5.676	472.825
2021-03-23 17:02:37	36.191	6.559	521.257		2021-04-13 17:09:11	35.962	5.497	473.032
2021-03-23 17:02:38	33.921	6.359	520.222		2021-04-13 17:09:12	54.113	5.323	468.064
2021-03-23 17:02:39	35.404	6.053	515.669		2021-04-13 17:09:13	83.862	5.195	446.746
2021-03-23 17:02:40	40.501	5.742	520.843		2021-04-13 17:09:14	99.488	5.336	447.574
2021-03-23 17:02:41	47.927	5.64	517.739		2021-04-13 17:09:15	113.559	5.517	474.895
2021-03-23 17:02:42	41.38	5.484	521.257		2021-04-13 17:09:16	159.642	5.876	523.534
2021-03-23 17:02:43	44.503	5.318	491.66		2021-04-13 17:09:17	201.2	6.403	523.741
2021-03-23 17:02:44	75.282	5.182	475.929		2021-04-13 17:09:18	207.779	7.323	573.415
2021-03-23 17:02:45	106.953	5.204	465.374		2021-04-13 17:09:19	226.665	8.068	572.38
2021-03-23 17:02:46	131.258	5.493	509.874		2021-04-13 17:09:20	226.665	8.979	606.531
2021-03-23 17:02:47	153.233	5.869	505.527		2021-04-13 17:09:21	226.691	10.081	686.631
2021-03-23 17:02:48	143.197	6.27	549.613		2021-04-13 17:09:22	226.678	11.139	689.322
2021-03-23 17:02:49	109.433	6.723	549.613		2021-04-13 17:09:23	226.678	12.063	760.314
2021-03-23 17:02:50	79.224	7.025	545.059		2021-04-13 17:09:24	226.685	13.021	812.472
2021-03-23 17:02:51	56.599	7.083	530.571		2021-04-13 17:09:25	226.698	13.71	812.472
2021-03-23 17:02:52	40.626	6.911	529.329		2021-04-13 17:09:26	226.685	14.53	865.044
2021-03-23 17:02:53	30.405	6.727	530.364		2021-04-13 17:09:27	226.672	15.231	864.837
2021-03-23 17:02:54	23.471	6.414	529.536		2021-04-13 17:09:28	213.9	15.688	895.056
2021-03-23 17:02:55	18.342	6.182	530.364		2021-04-13 17:09:29	195.578	15.879	947.007
2021-03-23 17:02:56	17.666	5.741	526.018		2021-04-13 17:09:30	169.607	16.004	947.42
2021-03-23 17:02:57	64.294	5.513	525.397		2021-04-13 17:09:31	139.89	15.857	920.721
2021-03-23 17:02:58	107.753	5.488	521.05		2021-04-13 17:09:32	109.689	15.528	894.021
2021-03-23 17:02:59	127.289	5.602	551.062		2021-04-13 17:09:33	85.03	15.034	894.435
2021-03-23 17:03:00	162.083	5.918	550.855		2021-04-13 17:09:34	66.806	14.278	819.302
2021-03-23 17:03:01	204.729	6.426	578.383		2021-04-13 17:09:35	55.012	13.569	821.372
2021-03-23 17:03:02	226.711	7.361	605.082		2021-04-13 17:09:36	47.435	12.906	759.072
2021-03-23 17:03:03	226.724	8.328	606.117		2021-04-13 17:09:37	40.56	12.06	694.289
2021-03-23 17:03:04	229.099	9.38	633.438		2021-04-13 17:09:38	35.489	11.292	694.082
2021-03-23 17:03:05	230.975	10.859	633.024		2021-04-13 17:09:39	31.179	10.569	621.02
2021-03-23 17:03:06	230.982	12.382	707.742		2021-04-13 17:09:40	32.308	9.868	559.548
2021-03-23 17:03:07	229.932	13.596	764.661		2021-04-13 17:09:41	58.475	9.188	565.55
2021-03-23 17:03:08	228.699	14.907	766.938		2021-04-13 17:09:42	94.102	8.743	516.497
2021-03-23 17:03:09	229.21	16.043	860.491		2021-04-13 17:09:43	136.558	8.664	507.597
2021-03-23 17:03:10	232.563	17.082	861.319		2021-04-13 17:09:44	141.347	8.702	523.327
2021-03-23 17:03:11	230.949	18.238	949.49		2021-04-13 17:09:45	117.974	8.851	526.225
2021-03-23 17:03:12	228.633	19.063	1032.69		2021-04-13 17:09:46	110.128	8.864	526.225
2021-03-23 17:03:13	226.901	19.784	1033.52		2021-04-13 17:09:47	124.507	8.889	526.846
2021-03-23 17:03:14	226.718	20.412	1142.6		2021-04-13 17:09:48	114.254	9.011	527.466
2021-03-23 17:03:15	226.705	20.757	1147.15		2021-04-13 17:09:49	95.624	9.013	527.052
2021-03-23 17:03:16	226.698	21.026	1147.36		2021-04-13 17:09:50	83.213	8.891	543.404
2021-03-23 17:03:17	211.203	21.056	1168.88		2021-04-13 17:09:51	78.535	8.738	543.818
2021-03-23 17:03:18	157.806	20.875	1082.78		2021-04-13 17:09:52	73.261	8.561	546.922
2021-03-23 17:03:19	115.238	20.385	1083.61		2021-04-13 17:09:53	65.114	8.382	551.062
2021-03-23 17:03:20	83.882	19.549	1005.58		2021-04-13 17:09:54	54.06	8.215	551.269
2021-03-23 17:03:21	63.29	18.722	892.986		2021-04-13 17:09:55	48.091	7.898	553.131
2021-03-23 17:03:22	48.15	17.731	892.158		2021-04-13 17:09:56	45.368	7.604	553.545
2021-03-23 17:03:23	38.658	16.556	790.326		2021-04-13 17:09:57	45.519	7.333	553.959
2021-03-23 17:03:24	31.179	15.499	790.533		2021-04-13 17:09:58	44.975	6.883	552.924
2021-03-23 17:03:25	26.043	14.257	713.538		2021-04-13 17:09:59	40.96	6.589	521.878
2021-03-23 17:03:26	22.573	13.376	658.275		2021-04-13 17:10:00	37.713	6.374	521.878
2021-03-23 17:03:27	19.253	12.393	658.482		2021-04-13 17:10:01	41.4	6.062	468.478
2021-03-23 17:03:28	17.39	11.384	581.28		2021-04-13 17:10:02	83.009	5.892	468.478
2021-03-23 17:03:29	15.698	10.516	581.073		2021-04-13 17:10:03	107.143	5.902	471.583
2021-03-23 17:03:30	14.202	9.664	503.871		2021-04-13 17:10:04	94.909	6.057	494.35
2021-03-23 17:03:31	13.448	8.866	443.848		2021-04-13 17:10:05	75.295	6.196	493.729
2021-03-23 17:03:32	12.543	8.267	444.469		2021-04-13 17:10:06	57.531	6.196	471.997
2021-03-23 17:03:33	11.749	7.702	391.483		2021-04-13 17:10:07	43.952	6.061	472.411
2021-03-23 17:03:34	10.935	7.054	372.028		2021-04-13 17:10:08	37.077	5.895	469.099
2021-03-23 17:03:35	10.614	6.522	369.958		2021-04-13 17:10:09	31.907	5.674	465.788
2021-03-23 17:03:36	9.991	6.04	364.99		2021-04-13 17:10:10	27.886	5.486	462.269
2021-03-23 17:03:37	9.302	5.535	363.956		2021-04-13 17:10:11	25.006	5.184	445.09
2021-03-23 17:03:38	16.583	5.178	364.576		2021-04-13 17:10:12	22.566	4.977	443.434
2021-03-23 17:03:39	29.467	4.853	364.37		2021-04-13 17:10:13	19.968	4.686	443.434
2021-03-23 17:03:40	28.7	4.656	367.474		2021-04-13 17:10:14	18.269	4.348	440.744
2021-03-23 17:03:41	26.01	4.337	367.888		2021-04-13 17:10:15	17.121	4.139	438.674
2021-03-23 17:03:42	59.197	4.18	387.137		2021-04-13 17:10:16	15.534	3.856	438.881
2021-03-23 17:03:43	120.512	4.203	371.821		2021-04-13 17:10:17	14.235	3.673	420.46
2021-03-23 17:03:44	190.166	4.7	422.116		2021-04-13 17:10:18	14.871	3.456	393.76
2021-03-23 17:03:45	226.698	5.488	475.309		2021-04-13 17:10:19	14.288	3.215	393.76
2021-03-23 17:03:46	226.705	6.436	475.309		2021-04-13 17:10:20	13.907	3.175	366.439
2021-03-23 17:03:47	226.711	7.741	554.994		2021-04-13 17:10:21	12.411	3.019	366.646
2021-03-23 17:03:48	226.698	8.831	554.373		2021-04-13 17:10:22	10.896	2.854	366.646
2021-03-23 17:03:49	226.691	9.878	625.78		2021-04-13 17:10:23	9.991	2.692	367.06
2021-03-23 17:03:50	210.502	10.712	660.138		2021-04-13 17:10:24	9.145	2.531	367.474
2021-03-23 17:03:51	161.263	11.392	661.173		2021-04-13 17:10:25	8.725	2.378	367.06
2021-03-23 17:03:52	116.898	11.722	707.742		2021-04-13 17:10:26	8.134	2.232	366.646
2021-03-23 17:03:53	83.213	11.735	708.156		2021-04-13 17:10:27	7.38	2.166	366.025
2021-03-23 17:03:54	60.916	11.549	708.156		2021-04-13 17:10:28	6.606	2.022	365.197
2021-03-23 17:03:55	44.673	11.098	707.949		2021-04-13 17:10:29	6.481	1.86	365.611
2021-03-23 17:03:56	34.787	10.665	707.742		2021-04-13 17:10:30	5.832	1.702	364.576
2021-03-23 17:03:57	27.125	10.042	704.638		2021-04-13 17:10:31	5.733	1.565	364.99
2021-03-23 17:03:58	22.546	9.367	688.08		2021-04-13 17:10:32	5.674	1.533	364.99
2021-03-23 17:03:59	18.597	8.747	688.287		2021-04-13 17:10:33	5.563	1.396	365.197
2021-03-23 17:04:00	15.914	8.239	631.575		2021-04-13 17:10:34	4.999	1.365	363.749
2021-03-23 17:04:01	14.261	7.708	579.831		2021-04-13 17:10:35	4.927	1.233	363.749
2021-03-23 17:04:02	13.953	7.102	578.176		2021-04-13 17:10:36	4.881	1.208	363.749
2021-03-23 17:04:03	13.395	6.549	521.05		2021-04-13 17:10:37	4.828	1.18	363.335
2021-03-23 17:04:04	12.602	6.064	442.813		2021-04-13 17:10:38	4.756	1.064	364.99
2021-03-23 17:04:05	11.729	5.657	443.227		2021-04-13 17:10:39	4.271	1.039	364.783
2021-03-23 17:04:06	10.85	5.2	396.037		2021-04-13 17:10:40	4.133	1.014	364.163
2021-03-23 17:04:07	10.01	4.86	396.244		2021-04-13 17:10:41	4.107	0.9	363.542
2021-03-23 17:04:08	9.19	4.487	366.646		2021-04-13 17:10:42	4.074	0.885	364.163
2021-03-23 17:04:09	8.482	4.157	366.853		2021-04-13 17:10:43	4.041	0.873	364.163
2021-03-23 17:04:10	8.206	3.838	366.439		2021-04-13 17:10:44	4.021	0.862	363.956
2021-03-23 17:04:11	7.518	3.531	366.232		2021-04-13 17:10:45	3.995	0.824	363.749
2021-03-23 17:04:12	14.242	3.334	366.232		2021-04-13 17:10:46	3.956	0.73	364.37
2021-03-23 17:04:13	58.528	3.197	368.509		2021-04-13 17:10:47	3.897	0.72	364.99
2021-03-23 17:04:14	133.383	3.225	386.516		2021-04-13 17:10:48	3.857	0.707	364.99
2021-03-23 17:04:15	174.934	3.713	371.2		2021-04-13 17:10:49	3.378	0.697	364.37
2021-03-23 17:04:16	180.063	4.495	420.874		2021-04-13 17:10:50	3.3	0.691	364.163
2021-03-23 17:04:17	172.657	5.324	472.825		2021-04-13 17:10:51	3.28	0.61	364.783
2021-03-23 17:04:18	135.869	5.95	472.825		2021-04-13 17:10:52	3.254	0.584	365.404
2021-03-23 17:04:19	98.176	6.519	502.422		2021-04-13 17:10:53	3.227	0.56	364.576
2021-03-23 17:04:20	70.211	6.73	526.225		2021-04-13 17:10:54	3.221	0.539	364.576
2021-03-23 17:04:21	69.397	6.854	526.018		2021-04-13 17:10:55	3.201	0.532	364.783
2021-03-23 17:04:22	163.401	6.9	556.029		2021-04-13 17:10:56	3.182	0.52	364.163
2021-03-23 17:04:23	226.718	7.545	604.875		2021-04-13 17:10:57	3.168	0.512	364.37
2021-03-23 17:04:24	230.116	8.529	605.289		2021-04-13 17:10:58	3.142	0.501	364.163
2021-03-23 17:04:25	230.739	10.019	690.356		2021-04-13 17:10:59	3.129	0.501	364.37
2021-03-23 17:04:26	230.306	11.412	702.568		2021-04-13 17:11:00	3.103	0.495	364.99
2021-03-23 17:04:27	228.568	12.895	782.875		2021-04-13 17:11:01	3.083	0.495	364.37
2021-03-23 17:04:28	226.941	14.02	842.691		2021-04-13 17:11:02	3.044	0.492	364.37
2021-03-23 17:04:29	226.718	15.079	841.656		2021-04-13 17:11:03	2.972	0.484	364.783
2021-03-23 17:04:30	226.724	16.014	921.135		2021-04-13 17:11:04	2.709	0.483	365.197
2021-03-23 17:04:31	227.689	16.76	919.065		2021-04-13 17:11:05	2.545	0.481	365.197
2021-03-23 17:04:32	231.67	17.729	950.732		2021-04-13 17:11:06	2.493	0.477	364.163
2021-03-23 17:04:33	232.464	18.593	977.018		2021-04-13 17:11:07	2.48	0.476	364.576
2021-03-23 17:04:34	232.143	19.401	976.397		2021-04-13 17:11:08	2.473	0.471	363.956
2021-03-23 17:04:35	231.139	20.375	1056.29		2021-04-13 17:11:09	2.453	0.463	364.99
2021-03-23 17:04:36	227.636	21.06	1139.7		2021-04-13 17:11:10	2.434	0.464	364.163
2021-03-23 17:04:37	226.705	21.596	1140.12		2021-04-13 17:11:11	2.421	0.468	364.99
2021-03-23 17:04:38	226.691	21.8	1141.98		2021-04-13 17:11:12	2.427	0.455	364.99
2021-03-23 17:04:39	226.691	21.903	1142.18		2021-04-13 17:11:13	2.401	0.454	365.404
2021-03-23 17:04:40	226.685	21.768	1144.26		2021-04-13 17:11:14	2.394	0.462	365.404
2021-03-23 17:04:41	207.976	21.609	1078.64		2021-04-13 17:11:15	2.388	0.448	365.404
2021-03-23 17:04:42	200.439	21.278	1079.26		2021-04-13 17:11:16	2.375	0.457	365.611
2021-03-23 17:04:43	226.691	21.042	1008.48		2021-04-13 17:11:17	2.375	0.446	366.232
2021-03-23 17:04:44	214.831	20.862	979.295		2021-04-13 17:11:18	2.368	0.404	366.232
2021-03-23 17:04:45	166.032	20.551	979.709		2021-04-13 17:11:19	2.362	0.406	365.404
2021-03-23 17:04:46	121.897	19.932	971.637		2021-04-13 17:11:20	2.348	0.439	366.232
2021-03-23 17:04:47	98.038	19.236	864.63		2021-04-13 17:11:21	2.342	0.421	365.404
2021-03-23 17:04:48	77.597	18.541	865.044		2021-04-13 17:11:22	2.335	0.403	366.439
2021-03-23 17:04:49	71.969	17.584	781.426		2021-04-13 17:11:23	2.329	0.444	366.232
2021-03-23 17:04:50	113.684	16.596	783.082		2021-04-13 17:11:24	2.322	0.436	365.818
2021-03-23 17:04:51	132.452	15.993	730.924		2021-04-13 17:11:25	2.316	0.396	365.404
2021-03-23 17:04:52	119.384	15.394	689.529		2021-04-13 17:11:26	2.316	0.386	365.611
2021-03-23 17:04:53	111.814	14.865	687.873		2021-04-13 17:11:27	2.296	0.365	364.99
2021-03-23 17:04:54	90.639	14.343	658.275		2021-04-13 17:11:28	2.289	0.356	364.99
2021-03-23 17:04:55	67.915	13.74	658.689		2021-04-13 17:11:29	2.283	0.348	364.576
2021-03-23 17:04:56	51.292	13.225	631.161		2021-04-13 17:11:30	2.276	0.353	364.37
2021-03-23 17:04:57	39.012	12.553	584.178		2021-04-13 17:11:31	2.263	0.36	364.99
2021-03-23 17:04:58	30.458	11.718	595.148		2021-04-13 17:11:32	2.25	0.348	365.197
2021-03-23 17:04:59	25	10.979	552.097		2021-04-13 17:11:33	2.23	0.359	365.197
2021-03-23 17:05:00	20.703	10.321	503.871		2021-04-13 17:11:34	2.23	0.363	364.783
2021-03-23 17:05:01	17.508	9.502	504.699		2021-04-13 17:11:35	2.211	0.373	364.99
2021-03-23 17:05:02	15.665	8.839	448.195		2021-04-13 17:11:36	2.178	0.353	365.197
2021-03-23 17:05:03	14.137	8.255	446.125		2021-04-13 17:11:37	2.139	0.351	364.99
2021-03-23 17:05:04	13.231	7.715	446.332		2021-04-13 17:11:38	2.139	0.352	365.197
2021-03-23 17:05:05	12.241	7.099	444.883		2021-04-13 17:11:39	2.001	0.348	365.197
2021-03-23 17:05:06	11.067	6.55	417.976		2021-04-13 17:11:40	1.843	0.356	364.783
2021-03-23 17:05:07	10.712	6.067	417.562		2021-04-13 17:11:41	1.804	0.355	365.404
2021-03-23 17:05:08	10.004	5.665	390.241		2021-04-13 17:11:42	1.712	0.378	364.783
2021-03-23 17:05:09	9.295	5.207	390.655		2021-04-13 17:11:43	1.666	0.392	365.404
2021-03-23 17:05:10	10.804	4.862	369.751		2021-04-13 17:11:44	1.66	0.377	365.818
2021-03-23 17:05:11	27.998	4.531	365.197		2021-04-13 17:11:45	1.64	0.405	365.818
2021-03-23 17:05:12	28.805	4.306	364.37		2021-04-13 17:11:46	1.627	0.363	366.232
2021-03-23 17:05:13	24.141	4.139	368.095		2021-04-13 17:11:47	1.62	0.357	365.197
2021-03-23 17:05:14	18.473	3.885	368.095		2021-04-13 17:11:48	1.62	0.341	366.025
2021-03-23 17:05:15	14.937	3.704	369.544		2021-04-13 17:11:49	1.607	0.346	365.404
2021-03-23 17:05:16	16.551	3.531	386.516		2021-04-13 17:11:50	1.588	0.359	365.197
2021-03-23 17:05:17	15.554	3.362	386.723		2021-04-13 17:11:51	1.588	0.361	365.818
2021-03-23 17:05:18	13.402	3.21	387.551		2021-04-13 17:11:52	1.574	0.36	365.611
2021-03-23 17:05:19	11.618	3.169	387.137		2021-04-13 17:11:53	1.574	0.353	365.197
2021-03-23 17:05:20	13.454	3.012	371.614		2021-04-13 17:11:54	1.574	0.355	364.99
2021-03-23 17:05:21	43.669	2.872	386.93		2021-04-13 17:11:55	1.561	0.356	365.404
2021-03-23 17:05:22	105.831	2.9	419.218		2021-04-13 17:11:56	1.561	0.369	366.232
2021-03-23 17:05:22	158.422	3.212	417.769		2021-04-13 17:11:57	1.555	0.359	364.783
2021-03-23 17:05:23	160.207	3.85	465.581		2021-04-13 17:11:58	1.548	0.374	365.197
2021-03-23 17:05:24	180.621	4.642	466.409		2021-04-13 17:11:59	1.542	0.36	366.025
2021-03-23 17:05:25	226.705	5.504	527.052		2021-04-13 17:12:00	1.555	0.359	365.197
2021-03-23 17:05:26	228.2	6.71	581.694		2021-04-13 17:12:01	1.535	0.439	365.197
2021-03-23 17:05:27	226.737	8.201	581.487		2021-04-13 17:12:02	1.528	0.401	365.197
2021-03-23 17:05:28	226.711	9.388	638.819		2021-04-13 17:12:03	1.528	0.366	365.197
2021-03-23 17:05:29	226.691	10.667	639.026		2021-04-13 17:12:04	1.522	0.441	365.404
2021-03-23 17:05:30	173.727	11.41	704.845		2021-04-13 17:12:05	1.535	0.423	364.99
2021-03-23 17:05:31	125.944	11.882	707.121		2021-04-13 17:12:06	1.522	0.359	366.439
2021-03-23 17:05:32	111.204	11.935	707.121		2021-04-13 17:12:07	1.515	0.35	366.025
2021-03-23 17:05:33	126.41	11.908	708.57		2021-04-13 17:12:08	1.515	0.356	366.646
2021-03-23 17:05:34	189.733	11.913	764.04		2021-04-13 17:12:09	1.509	0.386	366.025
2021-03-23 17:05:35	226.705	12.273	763.626		2021-04-13 17:12:10	1.502	0.448	365.404
2021-03-23 17:05:36	228.266	12.939	840.828		2021-04-13 17:12:11	1.496	0.441	364.576
2021-03-23 17:05:37	229.138	13.851	886.57		2021-04-13 17:12:12	1.496	0.421	365.197
2021-03-23 17:05:38	228.246	14.835	875.393		2021-04-13 17:12:13	1.502	0.45	366.232
2021-03-23 17:05:39	228.443	15.845	918.651		2021-04-13 17:19:04	1.456	-0.023	366.439
2021-03-23 17:05:40	226.921	16.72	920.721		2021-04-13 17:19:05	1.443	-0.021	366.232
2021-03-23 17:05:41	226.705	17.459	930.034		2021-04-13 17:19:06	2.06	-0.023	367.267
2021-03-23 17:05:42	208.829	17.962	948.455		2021-04-13 17:19:07	2.394	-0.015	366.439
2021-03-23 17:05:43	159.892	18.091	948.248		2021-04-13 17:19:08	3.123	-0.01	367.267
2021-03-23 17:05:44	142.298	17.923	869.391		2021-04-13 17:19:09	3.188	-0.008	366.025
2021-03-23 17:05:45	111.21	17.573	815.163		2021-04-13 17:19:10	3.136	-0.004	365.611
2021-03-23 17:05:46	83.186	16.902	814.749		2021-04-13 17:19:11	3.195	0	365.818
2021-03-23 17:05:47	62.68	16.217	810.195		2021-04-13 17:19:12	4.008	0.004	366.646
2021-03-23 17:05:48	50.38	15.364	810.609		2021-04-13 17:19:13	4.795	0.013	366.439
2021-03-23 17:05:49	41.078	14.383	791.982		2021-04-13 17:19:14	4.946	0.018	367.681
2021-03-23 17:05:50	33.58	13.553	729.889		2021-04-13 17:19:15	4.927	0.114	368.302
2021-03-23 17:05:51	27.676	12.726	730.924		2021-04-13 17:19:16	4.776	0.114	368.095
2021-03-23 17:05:52	23.288	11.735	664.691		2021-04-13 17:19:17	4.041	0.135	370.372
2021-03-23 17:05:53	19.417	10.879	590.387		2021-04-13 17:19:18	3.293	0.143	368.302
2021-03-23 17:05:54	17.318	10.163	594.527		2021-04-13 17:19:19	3.09	0.147	371.407
2021-03-23 17:05:55	15.068	9.329	520.843		2021-04-13 17:19:20	2.401	0.143	373.476
2021-03-23 17:05:56	14.117	8.588	519.187		2021-04-13 17:19:21	2.289	0.139	369.958
2021-03-23 17:05:57	13.1	8.05	444.676		2021-04-13 17:19:22	2.152	0.137	368.302
2021-03-23 17:05:58	12.149	7.417	391.069		2021-04-13 17:19:23	2.283	0.11	367.267
2021-03-23 17:05:59	11.021	6.849	389.621		2021-04-13 17:19:24	2.493	0.124	367.681
2021-03-23 17:06:00	10.686	6.257	370.165		2021-04-13 17:19:25	3.109	0.11	367.267
2021-03-23 17:06:01	9.991	5.867	365.404		2021-04-13 17:19:26	2.486	0.108	367.681
2021-03-23 17:06:02	9.269	5.38	365.404		2021-04-13 17:19:27	2.368	0.116	367.267
2021-03-23 17:06:03	9.066	5.024	366.232		2021-04-13 17:19:28	2.388	0.103	366.853
2021-03-23 17:06:04	8.449	4.677	365.404		2021-04-13 17:19:29	3.287	0.111	366.853
2021-03-23 17:06:05	8.246	4.226	364.99		2021-04-13 17:19:30	4.953	0.135	366.232
2021-03-23 17:06:06	7.629	3.981	365.404		2021-04-13 17:19:31	6.671	0.138	366.646
2021-03-23 17:06:07	7.347	3.677	364.783		2021-04-13 17:19:32	8.869	0.152	365.611
2021-03-23 17:06:08	6.671	3.478	363.956		2021-04-13 17:19:33	9.171	0.173	366.853
2021-03-23 17:06:09	6.566	3.205	364.37		2021-04-13 17:19:34	9.905	0.186	366.025
2021-03-23 17:06:10	6.475	3.056	363.542		2021-04-13 17:19:35	10.64	0.293	367.06
2021-03-23 17:06:11	5.897	2.873	363.335		2021-04-13 17:19:36	10.857	0.31	366.439
2021-03-23 17:06:12	5.812	2.705	363.956		2021-04-13 17:19:37	11.513	0.324	366.025
2021-03-23 17:06:13	5.746	2.536	363.749		2021-04-13 17:19:38	12.562	0.337	366.646
2021-03-23 17:06:14	5.694	2.379	364.163		2021-04-13 17:19:39	14.209	0.452	367.474
2021-03-23 17:06:15	5.622	2.222	363.335		2021-04-13 17:19:40	14.93	0.48	367.888
2021-03-23 17:06:16	5.091	2.084	362.714		2021-04-13 17:19:41	17.535	0.499	373.062
2021-03-23 17:06:17	5.018	2.007	363.128		2021-04-13 17:19:42	32.97	0.569	385.067
2021-03-23 17:06:18	4.959	1.842	362.3		2021-04-13 17:19:43	36.204	0.731	384.653
2021-03-23 17:06:19	4.907	1.695	364.163		2021-04-13 17:19:44	32.295	0.89	390.034
2021-03-23 17:06:20	4.854	1.561	364.163		2021-04-13 17:19:45	27.886	1.053	390.448
2021-03-23 17:06:21	4.802	1.526	364.783		2021-04-13 17:19:46	24.259	1.17	392.104
2021-03-23 17:06:22	4.763	1.397	364.99		2021-04-13 17:19:47	21.536	1.202	392.518
2021-03-23 17:06:23	4.251	1.362	364.37		2021-04-13 17:19:48	18.302	1.222	392.932
2021-03-23 17:06:24	4.192	1.236	364.163		2021-04-13 17:19:49	15.868	1.218	392.518
2021-03-23 17:06:25	4.166	1.211	365.197		2021-04-13 17:19:50	14.274	1.218	392.518
2021-03-23 17:06:26	4.087	1.067	365.404		2021-04-13 17:19:51	13.225	1.215	392.104
2021-03-23 17:06:27	4.061	1.041	364.163		2021-04-13 17:19:52	10.896	1.202	392.932
2021-03-23 17:06:28	4.034	1.022	365.611		2021-04-13 17:19:53	9.177	1.177	392.932
2021-03-23 17:06:29	4.008	0.906	364.576		2021-04-13 17:19:54	8.167	1.066	392.104
2021-03-23 17:06:30	3.982	0.89	364.783		2021-04-13 17:19:55	7.321	1.037	390.862
2021-03-23 17:06:31	3.969	0.875	364.576		2021-04-13 17:19:56	6.54	0.917	392.104
2021-03-23 17:06:32	3.936	0.863	364.576		2021-04-13 17:19:57	5.871	0.89	391.069
2021-03-23 17:06:33	3.451	0.76	365.197		2021-04-13 17:19:58	5.746	0.871	390.034
2021-03-23 17:06:34	3.418	0.738	364.163		2021-04-13 17:19:59	5.648	0.837	390.655
2021-03-23 17:06:35	3.385	0.725	365.404		2021-04-13 17:20:00	5.786	0.735	385.688
2021-03-23 17:06:36	3.359	0.713	364.576		2021-04-13 17:20:01	7.354	0.716	367.267
2021-03-23 17:06:37	3.346	0.702	363.542		2021-04-13 17:20:02	9.086	0.715	366.853
2021-03-23 17:06:38	3.313	0.691	363.542		2021-04-13 17:20:03	10.634	0.706	366.232
2021-03-23 17:06:39	3.3	0.591	363.335		2021-04-13 17:20:04	10.942	0.701	365.611
2021-03-23 17:06:40	3.273	0.575	363.335		2021-04-13 17:20:05	11.309	0.71	366.439
2021-03-23 17:06:41	3.254	0.56	363.542		2021-04-13 17:20:06	10.883	0.701	365.611
2021-03-23 17:06:42	3.241	0.55	363.956		2021-04-13 17:20:07	10.975	0.704	365.611
2021-03-23 17:06:43	3.214	0.538	363.749		2021-04-13 17:20:08	10.876	0.711	366.232
2021-03-23 17:06:44	3.195	0.525	363.335		2021-04-13 17:20:09	10.725	0.711	365.404
2021-03-23 17:06:45	3.182	0.517	363.749		2021-04-13 17:20:10	10.758	0.708	366.646
2021-03-23 17:06:46	3.149	0.508	363.335		2021-04-13 17:20:11	15.855	0.72	368.095
2021-03-23 17:06:47	3.142	0.506	363.749		2021-04-13 17:20:12	18.302	0.728	368.095
2021-03-23 17:06:48	3.123	0.503	363.335		2021-04-13 17:20:13	16.61	0.75	382.79
2021-03-23 17:06:49	3.109	0.497	363.956		2021-04-13 17:20:14	14.104	0.864	385.895
2021-03-23 17:06:50	3.077	0.49	363.749		2021-04-13 17:20:15	11.65	0.863	385.067
2021-03-23 17:06:51	3.063	0.486	363.749		2021-04-13 17:20:16	9.735	0.854	379.065
2021-03-23 17:06:52	2.578	0.481	363.542		2021-04-13 17:20:17	8.246	0.861	372.442
2021-03-23 17:06:53	2.552	0.479	363.749		2021-04-13 17:20:18	14.832	0.842	385.688
2021-03-23 17:06:54	2.532	0.476	363.749		2021-04-13 17:20:19	29.631	0.864	389.828
2021-03-23 17:06:55	2.519	0.472	363.335		2021-04-13 17:20:20	60.784	1.035	390.034
2021-03-23 17:06:56	2.506	0.468	363.128		2021-04-13 17:20:21	87.372	1.361	394.381
2021-03-23 17:06:57	2.499	0.467	363.128		2021-04-13 17:20:22	93.991	1.856	440.123
2021-03-23 17:06:58	2.48	0.464	363.128		2021-04-13 17:20:23	91.367	2.385	439.709
					2021-04-13 17:20:24	76.082	2.838	470.134
					2021-04-13 17:20:25	61.768	3.131	469.72
					2021-04-13 17:20:26	96.398	3.212	475.929
					2021-04-13 17:20:27	154.394	3.692	499.732
					2021-04-13 17:20:28	173.038	4.509	500.353
					2021-04-13 17:20:29	168.839	5.362	554.787
					2021-04-13 17:20:30	167.96	6.079	627.229
					2021-04-13 17:20:31	183.298	6.838	626.401
					2021-04-13 17:20:32	194.561	7.702	681.456
					2021-04-13 17:20:33	175.367	8.366	716.435
					2021-04-13 17:20:34	143.098	8.848	716.021
					2021-04-13 17:20:35	109.925	9.082	711.261
					2021-04-13 17:20:36	83.475	9.059	709.605
					2021-04-13 17:20:37	64.182	8.944	709.605
					2021-04-13 17:20:38	49.495	8.68	682.698
					2021-04-13 17:20:39	38.868	8.353	682.491
					2021-04-13 17:20:40	31.088	7.885	647.305
					2021-04-13 17:20:41	25.636	7.394	628.264
					2021-04-13 17:20:42	21.392	6.801	628.471
					2021-04-13 17:20:43	17.508	6.373	606.531
					2021-04-13 17:20:44	15.022	5.888	607.359
					2021-04-13 17:20:45	13.933	5.473	550.027
					2021-04-13 17:20:46	12.359	5.011	472.825
					2021-04-13 17:20:47	10.824	4.662	472.825
					2021-04-13 17:20:48	10.05	4.176	433.706
					2021-04-13 17:20:49	35.535	3.864	386.723
					2021-04-13 17:20:50	68.407	3.828	386.723
					2021-04-13 17:20:51	95.847	3.869	415.493
					2021-04-13 17:20:52	122.907	4.21	444.055
					2021-04-13 17:20:53	133.206	4.835	443.641
					2021-04-13 17:20:54	116.957	5.323	470.962
					2021-04-13 17:20:55	92.279	5.667	471.79
					2021-04-13 17:20:56	69.949	5.8	518.567
					2021-04-13 17:20:57	53.149	5.864	517.532
					2021-04-13 17:20:58	40.534	5.71	517.325
					2021-04-13 17:20:59	36.467	5.542	520.429
					2021-04-13 17:21:00	55.858	5.35	541.127
					2021-04-13 17:21:01	78.463	5.338	544.645
					2021-04-13 17:21:02	82.065	5.368	555.615
					2021-04-13 17:21:03	73.661	5.489	554.58
					2021-04-13 17:21:04	64.392	5.507	575.071
					2021-04-13 17:21:05	93.879	5.52	578.589
					2021-04-13 17:21:06	131.146	5.707	579.003
					2021-04-13 17:21:07	149.724	6.194	596.182
					2021-04-13 17:21:08	155.949	6.706	603.841
					2021-04-13 17:21:09	148.405	7.334	603.013
					2021-04-13 17:21:10	130.503	7.719	603.634
					2021-04-13 17:21:11	107.76	8.028	603.22
					2021-04-13 17:21:12	87.004	8.064	603.22
					2021-04-13 17:21:13	98.268	8.057	625.366
					2021-04-13 17:21:14	120.25	8.15	626.815
					2021-04-13 17:21:15	124.521	8.293	651.859
					2021-04-13 17:21:16	135.705	8.374	659.724
					2021-04-13 17:21:17	153.365	8.579	660.966
					2021-04-13 17:21:18	143.8	8.885	682.491
					2021-04-13 17:21:19	138.349	9.174	682.905
					2021-04-13 17:21:20	142.403	9.361	706.501
					2021-04-13 17:21:21	126.915	9.536	711.261
					2021-04-13 17:21:22	103.05	9.618	711.468
					2021-04-13 17:21:23	82.17	9.524	680.836
					2021-04-13 17:21:24	77.597	9.317	629.919
					2021-04-13 17:21:25	88.205	9.04	629.506
					2021-04-13 17:21:26	95.631	8.863	627.229
					2021-04-13 17:21:27	104.277	8.722	628.471
					2021-04-13 17:21:28	115.291	8.711	625.987
					2021-04-13 17:21:29	121.339	8.735	632.196
					2021-04-13 17:21:30	121.234	8.858	632.196
					2021-04-13 17:21:31	109.8	8.886	653.101
					2021-04-13 17:21:32	120.329	8.912	632.817
					2021-04-13 17:21:33	144.004	9.026	633.438
					2021-04-13 17:21:34	158.796	9.228	627.229
					2021-04-13 17:21:35	140.763	9.522	623.089
					2021-04-13 17:21:36	111.958	9.69	620.399
					2021-04-13 17:21:37	88.887	9.659	608.601
					2021-04-13 17:21:38	70.27	9.393	607.773
					2021-04-13 17:21:39	59.092	9.109	606.324
					2021-04-13 17:21:40	51.364	8.724	605.289
					2021-04-13 17:21:41	44.555	8.377	605.703
					2021-04-13 17:21:42	40.258	8.037	592.043
					2021-04-13 17:21:43	38.087	7.572	583.971
					2021-04-13 17:21:44	40.54	7.214	570.31
					2021-04-13 17:21:45	40.98	6.721	541.127
					2021-04-13 17:21:46	38.789	6.383	543.818
					2021-04-13 17:21:47	35.43	6.067	517.739
					2021-04-13 17:21:48	32.012	5.729	471.997
					2021-04-13 17:21:49	28.017	5.497	471.169
					2021-04-13 17:21:50	25.111	5.177	447.367
					2021-04-13 17:21:51	23.288	4.86	422.737
					2021-04-13 17:21:52	21.661	4.629	435.776
					2021-04-13 17:21:53	19.129	4.206	401.418
					2021-04-13 17:21:54	16.734	3.993	405.351
					2021-04-13 17:21:55	14.924	3.699	411.146
					2021-04-13 17:21:56	13.999	3.495	394.795
					2021-04-13 17:21:57	12.477	3.211	395.623
					2021-04-13 17:21:58	28.654	3.162	393.346
					2021-04-13 17:21:59	84.735	3.15	392.104
					2021-04-13 17:22:01	95.827	3.25	392.518
					2021-04-13 17:22:02	82.294	3.557	416.941
					2021-04-13 17:22:03	65.101	3.842	416.941
					2021-04-13 17:22:04	49.737	3.918	440.744
					2021-04-13 17:22:05	38.677	3.957	438.674
					2021-04-13 17:22:06	29.579	3.857	439.088
					2021-04-13 17:22:07	23.668	3.701	424.186
					2021-04-13 17:22:08	19.037	3.535	420.667
					2021-04-13 17:22:09	16.288	3.37	420.46
					2021-04-13 17:22:10	19.037	3.198	419.839
					2021-04-13 17:22:11	80.608	3.184	469.72
					2021-04-13 17:22:12	176.311	3.5	470.134
					2021-04-13 17:22:13	226.678	4.355	536.159
					2021-04-13 17:22:14	226.685	5.723	537.401
					2021-04-13 17:22:15	226.678	7.226	604.461
					2021-04-13 17:22:16	226.672	8.384	682.698
					2021-04-13 17:22:17	226.672	9.4	682.698
					2021-04-13 17:22:18	224.822	10.499	706.501
					2021-04-13 17:22:19	194.449	11.22	710.433
					2021-04-13 17:22:20	163.178	11.681	710.019
					2021-04-13 17:22:21	169.856	11.9	738.582
					2021-04-13 17:22:22	206.402	12.232	738.375
					2021-04-13 17:22:23	226.672	12.73	784.944
					2021-04-13 17:22:24	226.672	13.344	841.863
					2021-04-13 17:22:25	191.032	13.692	842.07
					2021-04-13 17:22:26	147.592	13.861	920.307
					2021-04-13 17:22:27	113.474	13.701	917.823
					2021-04-13 17:22:28	88.001	13.46	843.105
					2021-04-13 17:22:29	77.735	12.913	787.842
					2021-04-13 17:22:30	83.232	12.401	786.807
					2021-04-13 17:22:31	96.529	11.864	729.889
					2021-04-13 17:22:32	107.648	11.426	682.491
					2021-04-13 17:22:33	130.261	11.221	682.905
					2021-04-13 17:22:34	141.681	11.077	678.766
					2021-04-13 17:22:35	123.694	11.064	661.587
					2021-04-13 17:22:36	99.094	10.889	662.829
					2021-04-13 17:22:37	78.503	10.672	631.575
					2021-04-13 17:22:38	63.828	10.336	603.841
					2021-04-13 17:22:39	53.076	9.856	602.599
					2021-04-13 17:22:40	45.552	9.285	550.648
					2021-04-13 17:22:41	47.192	8.766	550.648
					2021-04-13 17:22:42	102.44	8.393	494.557
					2021-04-13 17:22:43	156.815	8.381	555.201
					2021-04-13 17:22:44	226.672	8.731	562.652
					2021-04-13 17:22:45	226.691	9.693	630.333
					2021-04-13 17:22:46	226.691	10.845	630.333
					2021-04-13 17:22:47	226.678	11.873	675.04
					2021-04-13 17:22:48	226.678	12.856	708.57
					2021-04-13 17:22:49	226.672	13.54	708.777
					2021-04-13 17:22:50	226.678	14.056	711.054
					2021-04-13 17:22:51	226.678	14.68	718.091
					2021-04-13 17:22:52	201.856	15.194	714.573
					2021-04-13 17:22:53	163.906	15.35	741.479
					2021-04-13 17:22:54	139.864	15.207	765.075
					2021-04-13 17:22:55	140.002	14.998	766.11
					2021-04-13 17:22:56	151.508	14.587	813.714
					2021-04-13 17:22:57	137.542	14.371	812.886
					2021-04-13 17:22:58	114.956	14.06	846.623
					2021-04-13 17:22:59	93.249	13.684	776.044
					2021-04-13 17:23:00	76.023	13.22	768.8
					2021-04-13 17:23:01	62.28	12.576	708.57
					2021-04-13 17:23:02	52.237	11.877	708.984
					2021-04-13 17:23:03	48.15	11.205	656.619
					2021-04-13 17:23:04	41.564	10.52	601.357
					2021-04-13 17:23:05	43.873	9.867	601.357
					2021-04-13 17:23:06	72.684	9.215	566.585
					2021-04-13 17:23:07	93.859	8.867	527.673
					2021-04-13 17:23:08	106.186	8.702	527.466
					2021-04-13 17:23:09	96.516	8.611	527.466
					2021-04-13 17:23:10	79.5	8.513	529.95
					2021-04-13 17:23:11	64.307	8.366	530.985
					2021-04-13 17:23:12	52.217	8.067	494.35
					2021-04-13 17:23:13	42.272	7.734	496.42
					2021-04-13 17:23:14	35.522	7.387	446.125
					2021-04-13 17:23:15	29.572	6.885	446.539
					2021-04-13 17:23:16	25.748	6.511	446.539
					2021-04-13 17:23:17	36.263	6.067	444.676
					2021-04-13 17:23:18	81.409	5.873	473.86
					2021-04-13 17:23:19	109.853	5.884	472.411
					2021-04-13 17:23:20	114.668	6.057	524.155
					2021-04-13 17:23:21	119.391	6.267	523.741
					2021-04-13 17:23:22	110.351	6.549	526.846
					2021-04-13 17:23:23	92.383	6.723	545.059
					2021-04-13 17:23:24	72.782	6.738	543.818
					2021-04-13 17:23:25	57.006	6.719	521.257
					2021-04-13 17:23:26	46.392	6.55	477.792
					2021-04-13 17:23:27	56.697	6.359	479.034
					2021-04-13 17:23:28	74.731	6.213	520.843
					2021-04-13 17:23:29	83.141	6.187	520.636
					2021-04-13 17:23:30	85.896	6.204	543.197
					2021-04-13 17:23:31	84.774	6.221	554.787
					2021-04-13 17:23:32	85.614	6.239	554.994
					2021-04-13 17:23:33	87.168	6.341	577.969
					2021-04-13 17:23:34	89.576	6.376	562.031
					2021-04-13 17:23:35	86.932	6.392	566.999
					2021-04-13 17:23:36	85.548	6.402	550.441
					2021-04-13 17:23:37	101.462	6.432	550.234
					2021-04-13 17:23:38	99.016	6.567	550.234
					2021-04-13 17:23:39	85.496	6.705	549.82
					2021-04-13 17:23:40	68.361	6.703	549.82
					2021-04-13 17:23:41	53.785	6.563	550.648
					2021-04-13 17:23:42	42.134	6.385	552.924
					2021-04-13 17:23:43	34.44	6.08	553.131
					2021-04-13 17:23:44	27.748	5.845	538.643
					2021-04-13 17:23:45	23.235	5.504	534.504
					2021-04-13 17:23:46	19.148	5.171	501.181
					2021-04-13 17:23:47	16.603	4.837	471.376
					2021-04-13 17:23:48	14.629	4.383	471.376
					2021-04-13 17:23:49	13.402	4.144	447.367
					2021-04-13 17:23:50	14.373	3.837	441.571
					2021-04-13 17:23:51	35.004	3.539	441.158
					2021-04-13 17:23:52	82.996	3.517	418.597
					2021-04-13 17:23:53	134.092	3.801	447.367
					2021-04-13 17:23:54	170.545	4.336	447.988
					2021-04-13 17:23:55	196.47	5.175	499.525
					2021-04-13 17:23:56	214.11	6.061	499.525
					2021-04-13 17:23:57	226.501	7.061	553.338
					2021-04-13 17:23:58	226.665	8.066	613.982
					2021-04-13 17:23:59	226.672	9.01	610.464
					2021-04-13 17:24:00	214.018	10.001	672.764
					2021-04-13 17:24:01	172.205	10.658	663.864
					2021-04-13 17:24:02	132.366	10.909	710.433
					2021-04-13 17:24:03	101.462	11.028	710.226
					2021-04-13 17:24:04	78.175	10.845	709.812
					2021-04-13 17:24:05	76.909	10.512	710.226
					2021-04-13 17:24:06	114.595	10.201	739.203
					2021-04-13 17:24:07	146.667	10.127	739.41
					2021-04-13 17:24:08	149.101	10.205	782.254
					2021-04-13 17:24:09	128.686	10.344	733.407
					2021-04-13 17:24:10	103.404	10.335	733.2
					2021-04-13 17:24:11	82.97	10.17	704.017
					2021-04-13 17:24:12	68.774	9.854	641.717
					2021-04-13 17:24:13	58.711	9.375	643.787
					2021-04-13 17:24:14	50.518	9.01	579.831
					2021-04-13 17:24:15	43.788	8.539	579.417
					2021-04-13 17:24:16	39.629	8.205	542.783
					2021-04-13 17:24:17	37.877	7.72	470.962
					2021-04-13 17:24:18	38.9	7.359	471.376
					2021-04-13 17:24:19	51.331	6.874	497.041
					2021-04-13 17:24:20	91.445	6.63	495.592
					2021-04-13 17:24:21	166.176	6.715	520.222
					2021-04-13 17:24:22	219.961	7.354	550.648
					2021-04-13 17:24:23	226.665	8.138	551.062
					2021-04-13 17:24:24	202.728	8.857	599.494
					2021-04-13 17:24:25	163.592	9.499	598.045
					2021-04-13 17:24:26	131.251	9.903	598.459
					2021-04-13 17:24:27	103.857	10.024	594.941
					2021-04-13 17:24:28	83.095	9.997	600.322
					2021-04-13 17:24:29	94.863	9.713	599.494
					2021-04-13 17:24:30	122.769	9.536	600.943
					2021-04-13 17:24:31	138.31	9.548	652.48
					2021-04-13 17:24:32	158.553	9.831	653.929
					2021-04-13 17:24:33	183.934	10.031	706.294
					2021-04-13 17:24:34	224.041	10.5	705.88
					2021-04-13 17:24:35	226.672	11.074	742.1
					2021-04-13 17:24:36	219.922	11.725	810.402
					2021-04-13 17:24:37	184.905	12.265	811.023
					2021-04-13 17:24:38	149.35	12.562	734.442
					2021-04-13 17:24:39	129.178	12.576	734.856
					2021-04-13 17:24:40	114.077	12.517	682.698
					2021-04-13 17:24:41	99.593	12.135	680.422
					2021-04-13 17:24:42	84.656	11.798	679.594
					2021-04-13 17:24:43	69.443	11.396	676.489
					2021-04-13 17:24:44	57.347	10.87	658.068
					2021-04-13 17:24:45	47.317	10.354	659.103
					2021-04-13 17:24:46	40.239	9.824	655.998
					2021-04-13 17:24:47	40.422	9.063	611.706
					2021-04-13 17:24:48	45.414	8.557	605.496
					2021-04-13 17:24:49	43.44	8.217	573.622
					2021-04-13 17:24:50	54.034	7.837	572.587
					2021-04-13 17:24:51	59.951	7.515	522.499
					2021-04-13 17:24:52	53.45	7.214	452.127
					2021-04-13 17:24:53	44.588	6.854	449.851
					2021-04-13 17:24:54	37.083	6.543	443.848
					2021-04-13 17:24:55	30.189	6.217	443.848
					2021-04-13 17:24:56	25.781	5.885	438.053
					2021-04-13 17:24:57	23.406	5.507	417.355
					2021-04-13 17:24:58	24.961	5.186	416.941
					2021-04-13 17:24:59	32.176	4.964	410.318
					2021-04-13 17:25:00	44.529	4.696	419.839
					2021-04-13 17:25:01	58.705	4.646	419.011
					2021-04-13 17:25:02	73.589	4.608	441.985
					2021-04-13 17:25:03	103.142	4.695	459.578
					2021-04-13 17:25:04	141.478	5.019	470.962
					2021-04-13 17:25:05	143.42	5.506	522.499
					2021-04-13 17:25:06	128.863	5.996	522.499
					2021-04-13 17:25:07	111.138	6.364	524.362
					2021-04-13 17:25:08	95.782	6.563	539.885
					2021-04-13 17:25:09	88.933	6.716	528.708
					2021-04-13 17:25:10	85.509	6.747	550.027
					2021-04-13 17:25:11	84.971	6.853	568.034
					2021-04-13 17:25:12	80.536	6.861	558.927
					2021-04-13 17:25:13	67.587	6.763	576.52
					2021-04-13 17:25:14	54.375	6.705	575.899
					2021-04-13 17:25:15	43.066	6.518	585.006
					2021-04-13 17:25:16	35.384	6.229	565.55
					2021-04-13 17:25:17	28.641	5.906	568.448
					2021-04-13 17:25:18	24.081	5.648	547.957
					2021-04-13 17:25:19	19.975	5.326	528.294
					2021-04-13 17:25:20	17.423	4.997	491.66
					2021-04-13 17:25:21	15.094	4.673	444.055
					2021-04-13 17:25:22	14.064	4.246	444.055
					2021-04-13 17:25:23	12.595	3.985	421.288
					2021-04-13 17:25:24	11.65	3.679	414.872
					2021-04-13 17:25:25	10.844	3.416	414.044
					2021-04-13 17:25:26	24.311	3.197	393.76
					2021-04-13 17:25:27	62.523	3.178	390.241
					2021-04-13 17:25:28	110.961	3.215	390.034
					2021-04-13 17:25:29	137.371	3.681	420.874
					2021-04-13 17:25:30	166.425	4.319	468.064
					2021-04-13 17:25:31	172.06	5.153	468.064
					2021-04-13 17:25:32	160.712	5.864	522.292
					2021-04-13 17:25:33	150.767	6.432	521.464
					2021-04-13 17:25:34	143.708	7.063	552.511
					2021-04-13 17:25:35	122.894	7.537	577.555
					2021-04-13 17:25:36	97.52	7.733	576.934
					2021-04-13 17:25:37	76.01	7.835	602.806
					2021-04-13 17:25:38	58.528	7.717	602.392
					2021-04-13 17:25:39	45.618	7.536	601.978
					2021-04-13 17:25:40	37.116	7.225	601.357
					2021-04-13 17:25:41	29.913	6.746	602.599
					2021-04-13 17:25:42	25.033	6.396	598.873
					2021-04-13 17:25:43	24.036	6.051	593.699
					2021-04-13 17:25:44	23.393	5.67	589.973
					2021-04-13 17:25:45	22.422	5.336	545.266
					2021-04-13 17:25:46	19.686	5.011	471.79
					2021-04-13 17:25:47	17.423	4.678	471.79
					2021-04-13 17:25:48	32.111	4.332	445.297
					2021-04-13 17:25:49	90.658	4.192	445.297
					2021-04-13 17:25:50	121.05	4.424	419.632
					2021-04-13 17:25:51	141.511	4.951	450.057
					2021-04-13 17:25:52	160.456	5.492	447.574
					2021-04-13 17:25:53	166.924	6.07	496.42
					2021-04-13 17:25:54	174.697	6.723	494.143
					2021-04-13 17:25:55	175.458	7.502	549.199
					2021-04-13 17:25:56	158.875	8.053	601.15
					2021-04-13 17:25:57	130.654	8.384	601.15
					2021-04-13 17:25:58	102.263	8.661	605.703
					2021-04-13 17:25:59	78.962	8.682	627.85
					2021-04-13 17:26:00	61.84	8.529	627.229
					2021-04-13 17:26:01	48.911	8.36	626.815
					2021-04-13 17:26:02	54.119	8.041	622.054
					2021-04-13 17:26:03	95.434	7.785	614.396
					2021-04-13 17:26:04	129.775	7.778	654.964
					2021-04-13 17:26:05	134.472	8.012	688.701
					2021-04-13 17:26:06	125.583	8.2	695.117
					2021-04-13 17:26:07	120.355	8.353	656.412
					2021-04-13 17:26:08	119.791	8.384	656.826
					2021-04-13 17:26:09	119.456	8.525	627.643
					2021-04-13 17:26:10	110.286	8.644	600.736
					2021-04-13 17:26:11	109.643	8.685	601.15
					2021-04-13 17:26:12	117.895	8.707	576.934
					2021-04-13 17:26:13	117.823	8.746	575.485
					2021-04-13 17:26:14	105.654	8.844	588.11
					2021-04-13 17:26:15	93.282	8.828	603.427
					2021-04-13 17:26:16	98.012	8.712	603.013
					2021-04-13 17:26:17	105.864	8.685	628.885
					2021-04-13 17:26:18	106.953	8.684	653.929
					2021-04-13 17:26:19	104.073	8.685	652.894
					2021-04-13 17:26:20	118.066	8.685	632.61
					2021-04-13 17:26:21	140.724	8.72	627.022
					2021-04-13 17:26:22	172.034	9.013	626.815
					2021-04-13 17:26:23	187.942	9.367	654.964
					2021-04-13 17:26:24	184.15	9.987	654.964
					2021-04-13 17:26:25	173.753	10.36	684.768
					2021-04-13 17:26:26	167.737	10.694	699.67
					2021-04-13 17:26:27	165.94	10.914	701.326
					2021-04-13 17:26:28	185.784	11.237	706.915
					2021-04-13 17:26:29	199.619	11.575	716.021
					2021-04-13 17:26:30	194.705	12.02	715.401
					2021-04-13 17:26:31	181.454	12.411	752.656
					2021-04-13 17:26:32	165.737	12.678	741.479
					2021-04-13 17:26:33	145.499	12.736	741.686
					2021-04-13 17:26:34	119.568	12.717	756.589
					2021-04-13 17:26:35	96.326	12.527	756.382
					2021-04-13 17:26:36	77.998	12.051	713.124
					2021-04-13 17:26:37	64.399	11.559	704.638
					2021-04-13 17:26:38	54.985	11.06	704.224
					2021-04-13 17:26:39	47.35	10.514	651.445
					2021-04-13 17:26:40	40.553	9.973	651.652
					2021-04-13 17:26:41	35.574	9.266	601.15
					2021-04-13 17:26:42	31.055	8.703	568.034
					2021-04-13 17:26:43	29.703	8.232	560.169
					2021-04-13 17:26:44	40.475	7.729	526.018
					2021-04-13 17:26:45	47.92	7.376	473.446
					2021-04-13 17:26:46	50.603	6.902	473.239
					2021-04-13 17:26:47	57.596	6.687	442.606
					2021-04-13 17:26:48	64.989	6.422	443.02
					2021-04-13 17:26:49	61.02	6.367	439.709
					2021-04-13 17:26:50	58.515	6.212	421.081
					2021-04-13 17:26:51	58.318	6.064	419.632
					2021-04-13 17:26:52	62.582	5.931	437.639
					2021-04-13 17:26:53	70.257	5.889	442.399
					2021-04-13 17:26:54	93.099	5.893	442.192
					2021-04-13 17:26:55	100.367	6.047	468.892
					2021-04-13 17:26:56	93.007	6.194	468.685
					2021-04-13 17:26:57	79.519	6.233	497.455
					2021-04-13 17:26:58	68.315	6.261	508.632
					2021-04-13 17:26:59	57.924	6.23	514.013
					2021-04-13 17:27:00	48.793	6.167	521.671
					2021-04-13 17:27:01	42.167	6.008	498.49
					2021-04-13 17:27:02	38.75	5.737	498.697
					2021-04-13 17:27:03	34.63	5.524	473.653
					2021-04-13 17:27:04	29.579	5.333	467.857
					2021-04-13 17:27:05	27.027	5.136	468.064
					2021-04-13 17:27:06	27.086	4.843	445.711
					2021-04-13 17:27:07	37.884	4.651	446.332
					2021-04-13 17:27:08	64.379	4.398	460.82
					2021-04-13 17:27:09	85.653	4.518	468.271
					2021-04-13 17:27:10	93.4	4.705	469.513
					2021-04-13 17:27:11	92.174	4.973	468.685
					2021-04-13 17:27:12	91.504	5.171	468.685
					2021-04-13 17:27:13	85.082	5.342	468.478
					2021-04-13 17:27:14	75.938	5.498	471.583
					2021-04-13 17:27:15	72.015	5.526	470.548
					2021-04-13 17:27:16	67.58	5.643	473.653
					2021-04-13 17:27:17	56.98	5.586	492.488
					2021-04-13 17:27:18	45.664	5.511	493.522
					2021-04-13 17:27:19	39.786	5.376	503.457
					2021-04-13 17:27:20	65.927	5.309	523.741
					2021-04-13 17:27:21	74.304	5.306	525.19
					2021-04-13 17:27:22	71.142	5.329	548.578
					2021-04-13 17:27:23	61.04	5.337	526.225
					2021-04-13 17:27:24	48.885	5.328	525.604
					2021-04-13 17:27:25	38.913	5.181	514.22
					2021-04-13 17:27:26	31.114	5.024	517.118
					2021-04-13 17:27:27	25.184	4.835	469.927
					2021-04-13 17:27:28	20.998	4.641	444.055
					2021-04-13 17:27:29	17.528	4.306	444.262
					2021-04-13 17:27:30	15.134	4.028	439.916
					2021-04-13 17:27:31	14.025	3.829	439.709
					2021-04-13 17:27:32	12.457	3.536	417.976
					2021-04-13 17:27:33	11.552	3.347	414.044
					2021-04-13 17:27:34	11.067	3.188	415.286
					2021-04-13 17:27:35	10.693	3.028	395.416
					2021-04-13 17:27:36	13.428	2.856	390.448
					2021-04-13 17:27:37	35.561	2.703	390.655
					2021-04-13 17:27:38	76.043	2.756	376.788
					2021-04-13 17:27:39	114.458	3.038	417.976
					2021-04-13 17:27:40	136.866	3.482	417.976
					2021-04-13 17:27:41	140.645	4.032	465.581
					2021-04-13 17:27:42	135.771	4.791	466.409
					2021-04-13 17:27:43	132.189	5.326	501.801
					2021-04-13 17:27:44	128.017	5.745	546.715
					2021-04-13 17:27:45	129.454	6.231	545.68
					2021-04-13 17:27:46	128.076	6.639	576.106
					2021-04-13 17:27:47	113.113	6.916	575.692
					2021-04-13 17:27:48	101.535	7.333	605.289
					2021-04-13 17:27:49	98.786	7.403	626.608
					2021-04-13 17:27:50	90.553	7.542	625.78
					2021-04-13 17:27:51	74.278	7.546	649.996
					2021-04-13 17:27:52	58.442	7.407	632.403
					2021-04-13 17:27:53	45.71	7.231	633.024
					2021-04-13 17:27:54	37.11	6.883	630.126
					2021-04-13 17:27:55	29.585	6.556	577.762
					2021-04-13 17:27:56	24.377	6.223	577.141
					2021-04-13 17:27:57	20.191	5.878	525.19
					2021-04-13 17:27:58	17.449	5.505	513.392
					2021-04-13 17:27:59	15.055	5.175	476.55
					2021-04-13 17:28:00	14.051	4.843	445.09
					2021-04-13 17:28:01	12.529	4.473	445.297
					2021-04-13 17:28:02	11.598	4.158	417.976
					2021-04-13 17:28:03	10.739	3.843	390.862
					2021-04-13 17:28:04	9.945	3.539	390.862
					2021-04-13 17:28:05	9.164	3.339	369.13
					2021-04-13 17:28:06	8.915	3.181	382.169
					2021-04-13 17:28:07	8.272	3	363.542
					2021-04-13 17:28:08	7.892	2.824	363.128
					2021-04-13 17:28:09	7.019	2.646	362.921
					2021-04-13 17:28:10	6.586	2.492	363.128
					2021-04-13 17:28:11	6.455	2.342	362.714
					2021-04-13 17:28:12	5.832	2.191	362.921
					2021-04-13 17:28:13	5.74	2.033	361.886
					2021-04-13 17:28:14	5.681	1.878	362.714
					2021-04-13 17:28:15	5.609	1.704	362.714
					2021-04-13 17:28:16	5.701	1.565	361.472
					2021-04-13 17:28:17	8.069	1.527	361.472
					2021-04-13 17:28:18	9.873	1.451	363.128
					2021-04-13 17:28:19	11.467	1.383	363.749
					2021-04-13 17:28:20	12.831	1.373	364.37
					2021-04-13 17:28:21	13.533	1.364	365.611
					2021-04-13 17:28:22	13.284	1.358	367.474
					2021-04-13 17:28:23	11.788	1.351	368.095
					2021-04-13 17:28:24	10.621	1.257	368.095
					2021-04-13 17:28:25	9.204	1.226	366.646
					2021-04-13 17:28:26	15.698	1.217	367.267
					2021-04-13 17:28:27	37.93	1.226	390.655
					2021-04-13 17:28:28	63.316	1.397	390.655
					2021-04-13 17:28:29	93.013	1.733	413.837
					2021-04-13 17:28:30	100.059	2.351	413.423
					2021-04-13 17:28:31	93.203	2.847	441.571
					2021-04-13 17:28:32	81.382	3.192	469.927
					2021-04-13 17:28:33	66.872	3.496	469.927
					2021-04-13 17:28:34	54.92	3.676	471.169
					2021-04-13 17:28:35	43.748	3.824	472.618
					2021-04-13 17:28:36	39.55	3.833	474.274
					2021-04-13 17:28:37	59.269	3.83	495.592
					2021-04-13 17:28:38	83.823	3.958	518.567
					2021-04-13 17:28:39	89.707	4.177	519.601
					2021-04-13 17:28:40	129.644	4.58	553.338
					2021-04-13 17:28:41	163.723	5.159	553.752
					2021-04-13 17:28:42	185.941	5.861	603.841
					2021-04-13 17:28:43	184.078	6.583	630.126
					2021-04-13 17:28:44	153.437	7.405	629.713
					2021-04-13 17:28:45	119.41	7.892	655.998
					2021-04-13 17:28:46	91.275	8.16	655.998
					2021-04-13 17:28:47	69.994	8.179	625.573
					2021-04-13 17:28:48	63.448	8.04	595.562
					2021-04-13 17:28:49	64.228	7.87	595.355
					2021-04-13 17:28:50	74.422	7.705	600.115
					2021-04-13 17:28:51	91.445	7.568	604.047
					2021-04-13 17:28:52	106.067	7.582	604.461
					2021-04-13 17:28:53	108.652	7.706	626.815
					2021-04-13 17:28:54	104.762	7.8	647.099
					2021-04-13 17:28:55	97.513	7.874	650.41
					2021-04-13 17:28:56	90.796	7.889	609.429
					2021-04-13 17:28:57	85.581	7.883	589.352
					2021-04-13 17:28:58	81.159	7.865	592.664
					2021-04-13 17:28:59	71.916	7.737	553.131
					2021-04-13 17:29:00	65.842	7.677	552.924
					2021-04-13 17:29:01	62.66	7.519	526.225
					2021-04-13 17:29:02	59.426	7.351	546.301
					2021-04-13 17:29:03	56.868	7.075	546.715
					2021-04-13 17:29:04	50.702	6.862	551.683
					2021-04-13 17:29:05	46.451	6.589	551.476
					2021-04-13 17:29:06	46.307	6.391	548.785
					2021-04-13 17:29:07	45.644	6.202	542.162
					2021-04-13 17:29:08	42.344	6.026	541.955
					2021-04-13 17:29:09	42.449	5.741	516.497
					2021-04-13 17:29:10	46.234	5.651	471.376
					2021-04-13 17:29:11	47.199	5.495	471.169
					2021-04-13 17:29:12	58.383	5.344	473.239
					2021-04-13 17:29:13	88.126	5.341	472.825
					2021-04-13 17:29:14	107.806	5.502	473.239
					2021-04-13 17:29:15	115.258	5.716	519.187
					2021-04-13 17:29:16	124.566	6.065	537.401
					2021-04-13 17:29:17	112.772	6.395	543.611
					2021-04-13 17:29:18	93.079	6.698	543.818
					2021-04-13 17:29:19	99.567	6.836	542.576
					2021-04-13 17:29:20	122.867	7.053	545.059
					2021-04-13 17:29:21	135.745	7.383	578.383
					2021-04-13 17:29:22	134.938	7.715	578.797
					2021-04-13 17:29:23	116.078	8.034	622.675
					2021-04-13 17:29:24	92.331	8.188	622.054
					2021-04-13 17:29:25	71.916	8.193	621.227
					2021-04-13 17:29:26	56.645	8.041	619.571
					2021-04-13 17:29:27	44.667	7.739	608.394
					2021-04-13 17:29:28	36.946	7.515	599.494
					2021-04-13 17:29:29	30.327	7.16	575.485
					2021-04-13 17:29:30	26.535	6.697	577.141
					2021-04-13 17:29:31	24.127	6.285	543.404
					2021-04-13 17:29:32	21.681	5.906	494.971
					2021-04-13 17:29:33	19.148	5.585	494.557
					2021-04-13 17:29:34	17.423	5.212	469.927
					2021-04-13 17:29:35	15.691	4.896	470.341
					2021-04-13 17:29:36	14.215	4.648	450.264
					2021-04-13 17:29:37	14.064	4.198	415.906
					2021-04-13 17:29:38	13.258	3.986	415.079
					2021-04-13 17:29:39	12.47	3.696	366.646
					2021-04-13 17:29:40	12.136	3.508	367.888
					2021-04-13 17:29:41	11.29	3.261	365.818
					2021-04-13 17:29:42	10.443	3.176	363.335
					2021-04-13 17:29:43	9.341	3.005	363.956
					2021-04-13 17:29:44	8.928	2.842	364.99
					2021-04-13 17:29:45	15.862	2.673	363.542
					2021-04-13 17:29:46	66.97	2.629	362.921
					2021-04-13 17:29:47	123.635	2.878	404.73
					2021-04-13 17:29:48	134.4	3.356	445.918
					2021-04-13 17:29:49	129.552	4.006	446.953
					2021-04-13 17:29:50	126.902	4.677	471.376
					2021-04-13 17:29:51	127.814	5.181	471.169
					2021-04-13 17:29:52	120.276	5.675	518.359
					2021-04-13 17:29:53	104.808	6.062	535.125
					2021-04-13 17:29:54	85.555	6.363	540.299
					2021-04-13 17:29:55	66.846	6.405	551.062
					2021-04-13 17:29:56	52.184	6.399	551.89
					2021-04-13 17:29:57	40.508	6.24	551.269
					2021-04-13 17:29:58	32.117	6.058	550.648
					2021-04-13 17:29:59	28.857	5.776	551.062
					2021-04-13 17:30:00	34.486	5.518	552.924
					2021-04-13 17:30:01	40.606	5.34	568.862
					2021-04-13 17:30:02	42.968	5.173	566.378
					2021-04-13 17:30:03	51.233	5.024	528.501
					2021-04-13 17:30:04	61.152	4.995	493.315
					2021-04-13 17:30:05	68.394	4.994	485.036
					2021-04-13 17:30:06	96.457	5.031	497.455
					2021-04-13 17:30:07	122.887	5.32	498.697
					2021-04-13 17:30:08	128.627	5.68	518.98
					2021-04-13 17:30:09	110.148	6.064	519.601
					2021-04-13 17:30:10	88.093	6.368	517.325
					2021-04-13 17:30:11	67.725	6.412	520.636
					2021-04-13 17:30:12	52.578	6.396	519.808
					2021-04-13 17:30:13	42.102	6.256	520.015
					2021-04-13 17:30:14	54.946	6.076	521.257
					2021-04-13 17:30:15	89.615	6.052	550.027
					2021-04-13 17:30:16	103.22	6.089	550.441
					2021-04-13 17:30:17	101.725	6.327	586.455
					2021-04-13 17:30:18	112.194	6.519	581.28
					2021-04-13 17:30:19	134.242	6.73	600.736
					2021-04-13 17:30:20	162.175	7.232	605.082
					2021-04-13 17:30:21	161.263	7.73	605.289
					2021-04-13 17:30:22	133.291	8.206	605.289
					2021-04-13 17:30:23	107.865	8.378	605.91
					2021-04-13 17:30:24	99.055	8.486	605.289
					2021-04-13 17:30:25	93.223	8.508	602.599
					2021-04-13 17:30:26	82.681	8.414	603.427
					2021-04-13 17:30:27	80.569	8.374	601.978
					2021-04-13 17:30:28	101.443	8.357	629.713
					2021-04-13 17:30:29	114.294	8.361	629.506
					2021-04-13 17:30:30	119.542	8.377	655.792
					2021-04-13 17:30:31	122.264	8.495	650.203
					2021-04-13 17:30:32	120.388	8.627	651.859
					2021-04-13 17:30:33	117.685	8.71	639.233
					2021-04-13 17:30:34	124.304	8.853	633.438
					2021-04-13 17:30:35	139.818	9.011	645.857
					2021-04-13 17:30:36	140.048	9.189	652.066
					2021-04-13 17:30:37	118.623	9.357	650.617
					2021-04-13 17:30:38	93.171	9.374	627.85
					2021-04-13 17:30:39	71.792	9.298	628.471
					2021-04-13 17:30:40	55.832	9.032	604.875
					2021-04-13 17:30:41	43.722	8.694	586.248
					2021-04-13 17:30:42	35.476	8.364	590.801
					2021-04-13 17:30:43	28.713	7.907	573.415
					2021-04-13 17:30:44	24.186	7.506	541.748
					2021-04-13 17:30:45	22.409	6.902	542.576
					2021-04-13 17:30:46	25.026	6.523	509.253
					2021-04-13 17:30:47	43.84	6.078	497.248
					2021-04-13 17:30:48	71.785	5.9	497.662
					2021-04-13 17:30:49	91.36	5.893	481.311
					2021-04-13 17:30:50	105.739	6.043	494.143
					2021-04-13 17:30:51	117.049	6.222	493.936
					2021-04-13 17:30:52	127.899	6.532	490.418
					2021-04-13 17:30:53	126.725	6.867	475.516
					2021-04-13 17:30:54	111.007	7.225	517.325
					2021-04-13 17:30:55	101.502	7.405	525.811
					2021-04-13 17:30:56	88.92	7.554	525.604
					2021-04-13 17:30:57	73.694	7.546	541.334
					2021-04-13 17:30:58	64.255	7.507	542.369
					2021-04-13 17:30:59	96.72	7.386	549.613
					2021-04-13 17:31:00	124.022	7.485	595.355
					2021-04-13 17:31:01	147.605	7.716	592.043
					2021-04-13 17:31:02	157.629	8.064	630.747
					2021-04-13 17:31:03	159.537	8.387	654.136
					2021-04-13 17:31:04	164.576	8.839	654.55
					2021-04-13 17:31:05	153.273	9.208	678.145
					2021-04-13 17:31:06	127.046	9.515	654.964
					2021-04-13 17:31:07	100.656	9.582	655.584
					2021-04-13 17:31:08	78.529	9.52	631.368
					2021-04-13 17:31:09	62.444	9.316	631.161
					2021-04-13 17:31:10	49.79	9.013	606.531
					2021-04-13 17:31:11	40.567	8.633	591.215
					2021-04-13 17:31:12	34.413	8.315	593.906
					2021-04-13 17:31:13	28.66	7.863	575.485
					2021-04-13 17:31:14	24.842	7.387	555.408
					2021-04-13 17:31:15	21.654	6.858	554.787
					2021-04-13 17:31:16	18.447	6.389	524.776
					2021-04-13 17:31:17	16.603	6.016	524.155
					2021-04-13 17:31:18	14.911	5.533	470.341
					2021-04-13 17:31:19	14.058	5.18	436.604
					2021-04-13 17:31:20	13.205	4.848	438.26
					2021-04-13 17:31:21	12.372	4.462	391.276
					2021-04-13 17:31:22	11.526	4.155	374.097
					2021-04-13 17:31:23	10.725	3.837	380.514
					2021-04-13 17:31:24	9.919	3.53	363.956
					2021-04-13 17:31:25	9.164	3.344	364.37
					2021-04-13 17:31:26	8.941	3.184	363.956
					2021-04-13 17:31:27	8.259	3.009	362.093
					2021-04-13 17:31:28	7.865	2.836	363.128
					2021-04-13 17:31:29	7.183	2.65	361.886
					2021-04-13 17:31:30	6.58	2.496	363.128
					2021-04-13 17:31:31	6.475	2.331	362.921
					2021-04-13 17:31:32	5.871	2.189	362.3
					2021-04-13 17:31:33	5.753	2.038	361.679
					2021-04-13 17:31:34	5.694	1.872	361.679
					2021-04-13 17:31:35	5.628	1.706	362.714
					2021-04-13 17:31:36	5.195	1.565	362.507
					2021-04-13 17:31:37	4.953	1.525	362.3
					2021-04-13 17:31:38	4.907	1.393	362.714
					2021-04-13 17:31:39	4.867	1.358	362.093
					2021-04-13 17:31:40	4.808	1.227	361.265
					2021-04-13 17:31:41	4.749	1.206	361.679
					2021-04-13 17:31:42	4.225	1.16	361.058
					2021-04-13 17:31:43	4.133	1.057	362.507
					2021-04-13 17:31:44	4.107	1.032	362.093
					2021-04-13 17:31:45	4.074	0.916	362.507
					2021-04-13 17:31:46	4.041	0.903	362.921
					2021-04-13 17:31:47	4.028	0.877	362.921
					2021-04-13 17:31:48	3.988	0.863	361.472
					2021-04-13 17:31:49	3.956	0.858	363.128
					2021-04-13 17:31:50	3.936	0.73	363.335
					2021-04-13 17:31:51	3.838	0.72	363.128
					2021-04-13 17:31:52	3.352	0.715	363.128
					2021-04-13 17:31:53	3.326	0.702	363.128
					2021-04-13 17:31:54	3.287	0.679	363.956
					2021-04-13 17:31:55	3.254	0.659	363.335
					2021-04-13 17:31:56	3.234	0.557	363.749
					2021-04-13 17:31:57	3.214	0.53	362.714
					2021-04-13 17:31:58	3.195	0.534	363.749
					2021-04-13 17:31:59	3.182	0.512	364.163
					2021-04-13 17:32:00	3.162	0.504	364.163
					2021-04-13 17:32:01	3.136	0.507	362.3
					2021-04-13 17:32:02	3.123	0.494	363.335
					2021-04-13 17:32:03	3.096	0.49	363.335
					2021-04-13 17:32:04	3.07	0.492	363.128
					2021-04-13 17:32:05	3.037	0.481	362.093
					2021-04-13 17:32:06	2.906	0.473	361.886
					2021-04-13 17:32:07	2.598	0.475	363.128
					2021-04-13 17:32:08	2.519	0.464	362.3
					2021-04-13 17:32:09	2.486	0.452	362.093
					2021-04-13 17:32:10	2.473	0.47	363.128
					2021-04-13 17:32:11	2.46	0.435	361.886
					2021-04-13 17:32:12	2.44	0.441	363.335
					2021-04-13 17:32:13	2.434	0.453	362.3
					2021-04-13 17:32:14	2.421	0.404	362.3
					2021-04-13 17:32:15	2.401	0.372	363.128
					2021-04-13 17:32:16	2.388	0.449	363.749
					2021-04-13 17:32:17	2.394	0.348	363.749
					2021-04-13 17:32:18	2.368	0.355	364.99
					2021-04-13 17:32:19	2.368	0.353	364.576
					2021-04-13 17:32:20	2.355	0.341	364.783
					2021-04-13 17:32:21	2.348	0.347	364.576
					2021-04-13 17:32:22	2.342	0.344	364.163
					2021-04-13 17:32:23	2.335	0.339	364.37
					2021-04-13 17:32:24	2.322	0.341	364.163
					2021-04-13 17:32:25	2.309	0.338	364.576
					2021-04-13 17:32:26	2.303	0.342	364.576
					2021-04-13 17:32:27	2.289	0.338	363.749
					2021-04-13 17:32:28	2.289	0.333	364.163
					2021-04-13 17:32:29	2.283	0.332	364.37
					2021-04-13 17:32:30	2.257	0.338	364.163
					2021-04-13 17:32:31	2.243	0.337	363.128
					2021-04-13 17:32:32	2.243	0.33	362.507
					2021-04-13 17:38:55	0.538	-0.031	362.3
					2021-04-13 17:38:56	0.623	-0.125	362.3
					2021-04-13 17:38:57	0.525	-0.035	361.472
					2021-04-13 17:38:58	0.525	-0.039	361.679
					2021-04-13 17:38:59	0.525	-0.018	361.886
					2021-04-13 17:39:00	0.531	-0.009	362.921
					2021-04-13 17:39:01	0.531	-0.004	363.335
					2021-04-13 17:39:02	0.544	-0.005	364.37
					2021-04-13 17:39:03	0.525	-0.006	363.128
					2021-04-13 17:39:04	0.525	-0.008	363.542
					2021-04-13 17:39:05	0.531	-0.008	363.542
					2021-04-13 17:39:06	0.505	-0.045	363.542
					2021-04-13 17:39:07	0.518	-0.031	363.749
					2021-04-13 17:39:08	0.525	-0.015	363.542
					2021-04-13 17:39:09	0.518	-0.003	362.507
					2021-04-13 17:39:10	0.518	-0.003	362.714
					2021-04-13 17:39:11	0.518	-0.006	363.335
					2021-04-13 17:39:12	0.518	-0.005	363.128
					2021-04-13 17:39:13	0.512	-0.005	363.749
					2021-04-13 17:39:14	0.512	-0.006	363.749
					2021-04-13 17:39:15	0.512	-0.008	364.783
					2021-04-13 17:39:16	0.518	-0.008	363.749
					2021-04-13 17:39:17	0.512	-0.014	363.749
					2021-04-13 17:39:18	0.505	-0.012	364.37
					2021-04-13 17:39:19	0.492	-0.008	364.163
					2021-04-13 17:39:20	0.512	-0.01	362.921
					2021-04-13 17:39:21	0.505	-0.009	363.956
					2021-04-13 17:39:22	0.492	-0.01	364.37
					2021-04-13 17:39:23	0.499	-0.01	363.749
					2021-04-13 17:39:24	0.505	-0.013	363.956
					2021-04-13 17:39:25	0.492	-0.015	364.163
					2021-04-13 17:39:26	0.525	-0.019	364.163
					2021-04-13 17:39:27	0.499	-0.018	363.749
					2021-04-13 17:39:28	0.499	-0.009	363.335
					2021-04-13 17:39:29	0.505	-0.012	363.956
					2021-04-13 17:39:30	0.499	-0.014	363.542
					2021-04-13 17:39:31	0.505	-0.012	365.818
					2021-04-13 17:39:32	0.499	-0.045	364.37
					2021-04-13 17:39:33	0.499	-0.017	364.37
					2021-04-13 17:39:34	0.505	-0.012	365.404
					2021-04-13 17:39:35	0.505	-0.009	363.956
					2021-04-13 17:39:36	0.505	-0.006	364.37
					2021-04-13 17:39:37	0.505	-0.013	363.749
					2021-04-13 17:39:38	0.512	-0.01	364.783
					2021-04-13 17:39:39	0.505	-0.012	364.783
					2021-04-13 17:39:40	0.499	-0.009	363.956
					2021-04-13 17:39:41	0.505	-0.012	364.576
					2021-04-13 17:39:42	0.499	-0.012	364.99
					2021-04-13 17:39:43	0.512	-0.01	364.576
					2021-04-13 17:39:44	0.505	-0.013	364.576
					2021-04-13 17:39:45	0.505	-0.013	366.439
					2021-04-13 17:39:46	0.505	-0.018	365.197
					2021-04-13 17:39:47	0.499	-0.018	364.576
					2021-04-13 17:39:48	0.512	-0.017	364.163
					2021-04-13 17:39:49	0.499	-0.017	364.99
					2021-04-13 17:39:50	0.499	-0.014	364.37
					2021-04-13 17:39:51	0.492	-0.015	363.749
					2021-04-13 17:39:52	0.485	-0.014	364.783
					2021-04-13 17:39:53	0.505	-0.019	363.956
					2021-04-13 17:39:54	0.505	-0.021	364.37
					2021-04-13 17:39:55	0.505	-0.018	364.163
					2021-04-13 17:39:56	0.512	-0.021	364.783
					2021-04-13 17:39:57	0.531	-0.023	364.576
					2021-04-13 17:39:58	0.597	-0.022	364.99
					2021-04-13 17:39:59	0.663	-0.018	364.37
					2021-04-13 17:40:00	0.689	-0.015	364.99
					2021-04-13 17:40:01	0.702	-0.015	364.99
					2021-04-13 17:40:02	0.708	-0.015	364.783
					2021-04-13 17:40:03	0.715	-0.014	364.576
					2021-04-13 17:40:04	0.735	-0.012	365.611
					2021-04-13 17:40:05	0.768	-0.012	365.611
					2021-04-13 17:40:06	0.761	-0.012	365.197
					2021-04-13 17:40:07	0.754	-0.015	365.818
					2021-04-13 17:40:08	0.728	-0.014	364.99
					2021-04-13 17:40:09	0.715	-0.013	364.99
					2021-04-13 17:40:10	0.741	-0.01	364.783
					2021-04-13 17:40:11	1.299	-0.012	365.818
					2021-04-13 17:40:12	1.397	-0.013	364.37
					2021-04-13 17:40:13	1.358	-0.013	365.197
					2021-04-13 17:40:14	1.305	-0.012	364.783
					2021-04-13 17:40:15	0.82	-0.013	364.99
					2021-04-13 17:40:16	0.768	-0.015	365.404
					2021-04-13 17:40:17	0.735	-0.019	365.404
					2021-04-13 17:40:18	0.754	-0.01	365.818
					2021-04-13 17:40:19	0.768	-0.013	364.99
					2021-04-13 17:40:20	1.496	-0.014	364.783
					2021-04-13 17:40:21	2.283	-0.006	364.99
					2021-04-13 17:40:22	3.05	-0.004	365.611
					2021-04-13 17:40:23	3.241	-0.001	365.197
					2021-04-13 17:40:24	3.227	0.005	365.404
					2021-04-13 17:40:25	3.195	0.01	365.818
					2021-04-13 17:40:26	3.214	0.015	366.025
					2021-04-13 17:40:27	3.555	0.017	366.853
					2021-04-13 17:40:28	4.041	0.023	365.818
					2021-04-13 17:40:29	4.198	0.049	365.818
					2021-04-13 17:40:30	4.69	0.125	366.646
					2021-04-13 17:40:31	4.074	0.138	366.232
					2021-04-13 17:40:32	3.811	0.141	367.267
					2021-04-13 17:40:33	3.168	0.146	366.646
					2021-04-13 17:40:34	3.031	0.146	365.404
					2021-04-13 17:40:35	3.254	0.141	365.197
					2021-04-13 17:40:36	3.254	0.143	366.025
					2021-04-13 17:40:37	3.221	0.138	365.818
					2021-04-13 17:40:38	3.365	0.141	366.232
					2021-04-13 17:40:39	3.293	0.144	367.474
					2021-04-13 17:40:40	3.214	0.144	368.095
					2021-04-13 17:40:41	4.054	0.143	366.232
					2021-04-13 17:40:42	4.94	0.155	366.232
					2021-04-13 17:40:43	5.72	0.154	368.302
					2021-04-13 17:40:44	6.553	0.157	368.716
					2021-04-13 17:40:45	9.486	0.177	368.302
					2021-04-13 17:40:46	13.218	0.232	369.544
					2021-04-13 17:40:47	14.137	0.315	385.895
					2021-04-13 17:40:48	14.097	0.343	385.481
					2021-04-13 17:40:49	13.31	0.459	386.93
					2021-04-13 17:40:50	12.372	0.485	388.379
					2021-04-13 17:40:51	10.765	0.495	387.137
					2021-04-13 17:40:52	9.676	0.502	386.516
					2021-04-13 17:40:53	8.915	0.507	387.758
					2021-04-13 17:40:54	8.462	0.507	387.965
					2021-04-13 17:40:55	9.059	0.503	387.551
					2021-04-13 17:40:56	11.257	0.507	386.93
					2021-04-13 17:40:57	12.516	0.513	388.379
					2021-04-13 17:40:58	12.392	0.534	389
					2021-04-13 17:40:59	11.414	0.557	388.586
					2021-04-13 17:41:00	10.68	0.568	388.379
					2021-04-13 17:41:01	14.064	0.572	388.793
					2021-04-13 17:41:02	21.53	0.685	389.414
					2021-04-13 17:41:03	26.561	0.73	389.621
					2021-04-13 17:41:04	26.548	0.873	389.621
					2021-04-13 17:41:05	23.386	0.907	390.241
					2021-04-13 17:41:06	19.293	1.042	391.483
					2021-04-13 17:41:07	16.538	1.049	392.104
					2021-04-13 17:41:08	14.156	1.06	392.518
					2021-04-13 17:41:09	12.536	1.058	392.311
					2021-04-13 17:41:10	11.421	1.044	391.897
					2021-04-13 17:41:11	10.647	1.039	391.897
					2021-04-13 17:41:12	9.991	1.026	391.276
					2021-04-13 17:41:13	9.781	0.928	392.311
					2021-04-13 17:41:14	9.092	0.894	390.862
					2021-04-13 17:41:15	8.915	0.884	391.069
					2021-04-13 17:41:16	8.311	0.867	390.241
					2021-04-13 17:41:17	7.878	0.854	388.586
					2021-04-13 17:41:18	7.406	0.836	388.793
					2021-04-13 17:41:19	8.062	0.737	378.444
					2021-04-13 17:41:20	8.272	0.725	379.893
					2021-04-13 17:41:21	8.705	0.716	367.06
					2021-04-13 17:41:22	8.908	0.708	365.611
					2021-04-13 17:41:23	8.83	0.702	365.611
					2021-04-13 17:41:24	8.889	0.699	364.99
					2021-04-13 17:41:25	9.105	0.691	365.197
					2021-04-13 17:41:26	9.61	0.685	364.576
					2021-04-13 17:41:27	9.82	0.676	364.576
					2021-04-13 17:41:28	9.905	0.679	364.783
					2021-04-13 17:41:29	10.575	0.685	363.749
					2021-04-13 17:41:30	11.539	0.694	366.439
					2021-04-13 17:41:31	11.46	0.698	366.232
					2021-04-13 17:41:32	10.653	0.707	365.818
					2021-04-13 17:41:33	9.84	0.707	366.025
					2021-04-13 17:41:34	8.954	0.699	365.818
					2021-04-13 17:41:35	7.472	0.698	365.611
					2021-04-13 17:41:36	6.376	0.689	366.025
					2021-04-13 17:41:37	5.589	0.57	364.99
					2021-04-13 17:41:38	4.828	0.561	366.025
					2021-04-13 17:41:39	4.08	0.539	365.197
					2021-04-13 17:41:40	4.002	0.513	365.404
					2021-04-13 17:41:41	3.89	0.501	365.404
					2021-04-13 17:41:42	4.12	0.49	365.197
					2021-04-13 17:41:43	5.655	0.48	365.404
					2021-04-13 17:41:44	6.599	0.476	365.611
					2021-04-13 17:41:45	13.395	0.479	365.611
					2021-04-13 17:41:46	18.322	0.497	369.13
					2021-04-13 17:41:47	18.355	0.538	385.895
					2021-04-13 17:41:48	16.577	0.688	386.309
					2021-04-13 17:41:49	14.156	0.713	385.895
					2021-04-13 17:41:50	12.333	0.728	384.86
					2021-04-13 17:41:51	10.227	0.737	386.309
					2021-04-13 17:41:52	8.994	0.729	387.551
					2021-04-13 17:41:53	7.406	0.721	387.137
					2021-04-13 17:41:54	5.851	0.713	386.516
					2021-04-13 17:41:55	6.435	0.702	387.137
					2021-04-13 17:41:56	5.806	0.691	386.93
					2021-04-13 17:41:57	5.589	0.572	388.586
					2021-04-13 17:41:58	4.841	0.559	388.172
					2021-04-13 17:41:59	4.087	0.539	388.379
					2021-04-13 17:42:00	3.943	0.513	387.344
					2021-04-13 17:42:01	3.267	0.501	386.93
					2021-04-13 17:42:02	3.162	0.489	367.267
					2021-04-13 17:42:03	2.86	0.48	364.783
					2021-04-13 17:42:04	2.44	0.461	365.611
					2021-04-13 17:42:05	2.394	0.391	365.404
					2021-04-13 17:42:06	2.362	0.341	364.576
					2021-04-13 17:42:07	3.057	0.332	364.99
					2021-04-13 17:42:08	3.838	0.325	364.576
					2021-04-13 17:42:09	4.067	0.323	364.99
					2021-04-13 17:42:10	4.146	0.32	365.611
					2021-04-13 17:42:11	4.986	0.321	364.783
					2021-04-13 17:42:12	37.884	0.337	365.611
					2021-04-13 17:42:13	91.393	0.68	364.99
					2021-04-13 17:42:14	160.613	1.353	365.818
					2021-04-13 17:42:15	226.678	2.647	449.023
					2021-04-13 17:42:16	226.685	4.148	560.169
					2021-04-13 17:42:17	226.698	5.902	567.62
					2021-04-13 17:42:18	226.685	7.684	629.506
					2021-04-13 17:42:19	226.672	8.907	700.084
					2021-04-13 17:42:20	193.328	10.04	704.017
					2021-04-13 17:42:21	149.448	10.673	707.535
					2021-04-13 17:42:22	115.993	10.859	707.535
					2021-04-13 17:42:23	90.514	10.83	709.812
					2021-04-13 17:42:24	70.906	10.521	709.605
					2021-04-13 17:42:25	56.881	10.154	710.226
					2021-04-13 17:42:26	46.418	9.53	709.398
					2021-04-13 17:42:27	39.34	9.014	709.398
					2021-04-13 17:42:28	32.885	8.413	709.191
					2021-04-13 17:42:29	28.057	8.031	709.191
					2021-04-13 17:42:30	24.226	7.43	609.015
					2021-04-13 17:42:31	20.815	6.86	608.394
					2021-04-13 17:42:32	17.804	6.368	518.567
					2021-04-13 17:42:33	15.77	5.875	519.187
					2021-04-13 17:42:34	14.15	5.466	441.985
					2021-04-13 17:42:35	14.143	5.009	386.309
					2021-04-13 17:42:36	14.084	4.659	386.102
					2021-04-13 17:42:37	13.185	4.183	368.095
					2021-04-13 17:42:38	11.736	3.859	367.681
					2021-04-13 17:42:39	10.771	3.565	364.163
					2021-04-13 17:42:40	9.886	3.336	362.921
					2021-04-13 17:42:41	9.066	3.18	363.542
					2021-04-13 17:42:42	8.298	2.972	364.163
					2021-04-13 17:42:43	7.695	2.714	363.956
					2021-04-13 17:42:44	6.626	2.536	363.956
					2021-04-13 17:42:45	6.462	2.357	362.921
					2021-04-13 17:42:46	5.792	2.194	363.956
					2021-04-13 17:42:47	5.681	2.028	363.542
					2021-04-13 17:42:48	5.464	1.784	363.335
					2021-04-13 17:42:49	5.786	1.675	367.267
					2021-04-13 17:42:50	18.302	1.538	367.267
					2021-04-13 17:42:51	49.639	1.548	378.651
					2021-04-13 17:42:52	72.579	1.851	383.411
					2021-04-13 17:42:53	71.844	2.218	399.555
					2021-04-13 17:42:54	61.657	2.538	422.737
					2021-04-13 17:42:55	51.305	2.805	422.53
					2021-04-13 17:42:56	42.777	2.88	439.916
					2021-04-13 17:42:57	37.155	2.98	438.26
					2021-04-13 17:42:58	31.199	3	440.951
					2021-04-13 17:42:59	25.938	2.913	441.571
					2021-04-13 17:43:00	21.726	2.864	441.158
					2021-04-13 17:43:01	17.587	2.792	441.985
					2021-04-13 17:43:02	14.924	2.673	442.813
					2021-04-13 17:43:03	13.271	2.525	442.399
					2021-04-13 17:43:04	11.736	2.373	443.02
[truncated: 1,582 more rows]

## Sheet: 9 MultiGAS 2022
Sheet S9: Raw MultiGAS data for samples from 2022 in ppmv.
Sample ME-1					Sample ME-2					Sample ME-17
Time	SO2	H2S	CO2		Time	SO2	H2S	CO2		Time	SO2	H2S	CO2
2022-08-16 12:37:37	0.174	-0.147	435.31		2022-08-16 14:04:18	4.649	1.568	414.273		2022-08-21 15:23:44	0.114	0.018	436.312
2022-08-16 12:37:38	0.18	-0.146	435.453		2022-08-16 14:04:19	4.535	1.561	414.559		2022-08-21 15:23:45	0.114	0.016	437.743
2022-08-16 12:37:39	0.18	-0.149	435.31		2022-08-16 14:04:20	3.934	1.558	414.559		2022-08-21 15:23:46	0.107	0.016	437.743
2022-08-16 12:37:40	0.187	-0.149	434.738		2022-08-16 14:04:21	3.894	1.551	413.987		2022-08-21 15:23:47	0.107	0.015	437.743
2022-08-16 12:37:41	0.194	-0.15	435.167		2022-08-16 14:04:22	3.874	1.548	414.13		2022-08-21 15:23:48	0.114	0.016	440.176
2022-08-16 12:37:42	0.194	-0.153	435.024		2022-08-16 14:04:23	3.86	1.54	413.701		2022-08-21 15:23:49	0.107	0.016	440.749
2022-08-16 12:37:43	0.194	-0.154	434.738		2022-08-16 14:04:24	3.854	1.533	413.557		2022-08-21 15:23:50	0.107	0.015	454.058
2022-08-16 12:37:44	0.194	-0.151	435.167		2022-08-16 14:04:25	3.86	1.521	413.128		2022-08-21 15:23:51	0.114	0.016	454.773
2022-08-16 12:37:45	0.214	-0.151	435.453		2022-08-16 14:04:26	3.921	1.51	413.128		2022-08-21 15:23:52	0.114	0.015	454.201
2022-08-16 12:37:46	0.287	-0.143	434.738		2022-08-16 14:04:27	4.014	1.499	413.128		2022-08-21 15:23:53	0.114	0.016	455.775
2022-08-16 12:37:47	0.361	-0.146	434.881		2022-08-16 14:04:28	3.894	1.484	413.128		2022-08-21 15:23:54	0.107	0.015	456.061
2022-08-16 12:37:48	0.321	-0.144	434.881		2022-08-16 14:04:29	3.827	1.478	413.844		2022-08-21 15:23:55	0.107	0.012	456.061
2022-08-16 12:37:49	0.361	-0.141	435.167		2022-08-16 14:04:30	3.747	1.444	413.557		2022-08-21 15:23:56	0.107	0.016	456.204
2022-08-16 12:37:50	1.342	-0.135	434.738		2022-08-16 14:04:31	3.052	1.399	413.844		2022-08-21 15:23:57	0.107	0.015	456.204
2022-08-16 12:37:51	2.865	-0.125	435.167		2022-08-16 14:04:32	2.945	1.384	413.701		2022-08-21 15:23:58	0.114	0.015	456.348
2022-08-16 12:37:52	3.794	-0.007	435.167		2022-08-16 14:04:33	2.785	1.375	413.557		2022-08-21 15:23:59	0.114	0.012	457.349
2022-08-16 12:37:53	3.881	0.018	435.597		2022-08-16 14:04:34	2.231	1.365	412.413		2022-08-21 15:24:00	0.114	0.015	457.349
2022-08-16 12:37:54	3.727	0.025	435.597		2022-08-16 14:04:35	2.184	1.355	413.271		2022-08-21 15:24:01	0.114	0.015	457.349
2022-08-16 12:37:55	2.972	0.031	435.883		2022-08-16 14:04:36	2.157	1.349	412.842		2022-08-21 15:24:02	0.107	0.013	457.349
2022-08-16 12:37:56	3.647	0.036	436.885		2022-08-16 14:04:37	2.144	1.271	412.985		2022-08-21 15:24:03	0.107	0.015	457.779
2022-08-16 12:37:57	3.901	0.037	437.028		2022-08-16 14:04:38	2.157	1.206	413.128		2022-08-21 15:24:04	0.114	0.013	459.21
2022-08-16 12:37:58	4.675	0.042	436.885		2022-08-16 14:04:39	2.164	1.202	412.27		2022-08-21 15:24:05	0.114	0.01	459.353
2022-08-16 12:37:59	4.695	0.048	437.886		2022-08-16 14:04:40	2.164	1.193	412.413		2022-08-21 15:24:06	0.114	0.009	472.948
2022-08-16 12:38:00	4.689	0.055	438.316		2022-08-16 14:04:41	2.164	1.191	412.699		2022-08-21 15:24:07	0.114	-0.111	472.948
2022-08-16 12:38:01	4.695	0.071	439.317		2022-08-16 14:04:42	2.164	1.187	411.268		2022-08-21 15:24:08	0.114	0.012	473.807
2022-08-16 12:38:02	4.702	0.186	440.892		2022-08-16 14:04:43	2.151	1.187	412.413		2022-08-21 15:24:09	0.114	-0.11	472.948
2022-08-16 12:38:03	4.669	0.203	441.178		2022-08-16 14:04:44	2.137	1.182	411.268		2022-08-21 15:24:10	0.114	-0.11	472.376
2022-08-16 12:38:04	3.914	0.211	440.749		2022-08-16 14:04:45	2.124	1.181	400.678		2022-08-21 15:24:11	0.114	0.012	472.09
2022-08-16 12:38:05	3.734	0.215	441.178		2022-08-16 14:04:46	2.111	1.176	411.697		2022-08-21 15:24:12	0.107	0.009	459.925
2022-08-16 12:38:06	2.986	0.212	441.607		2022-08-16 14:04:47	2.104	1.178	409.407		2022-08-21 15:24:13	0.114	-0.108	473.092
2022-08-16 12:38:07	2.845	0.215	440.605		2022-08-16 14:04:48	2.104	1.175	410.409		2022-08-21 15:24:14	0.114	-0.117	472.376
2022-08-16 12:38:08	2.211	0.214	442.323		2022-08-16 14:04:49	2.104	1.175	410.838		2022-08-21 15:24:15	0.107	-0.116	472.805
2022-08-16 12:38:09	2.144	0.211	439.317		2022-08-16 14:04:50	2.097	1.175	411.125		2022-08-21 15:24:16	0.107	-0.114	472.805
2022-08-16 12:38:10	2.084	0.206	440.462		2022-08-16 14:04:51	2.111	1.172	411.554		2022-08-21 15:24:17	0.107	-0.113	472.233
2022-08-16 12:38:11	2.024	0.202	440.605		2022-08-16 14:04:52	2.104	1.169	410.982		2022-08-21 15:24:18	0.114	-0.117	472.376
2022-08-16 12:38:12	1.91	0.201	439.89		2022-08-16 14:04:53	2.097	1.167	399.962		2022-08-21 15:24:19	0.114	-0.116	459.782
2022-08-16 12:38:13	1.93	0.195	439.461		2022-08-16 14:04:54	2.097	1.169	400.534		2022-08-21 15:24:20	0.107	-0.12	458.065
2022-08-16 12:38:14	1.944	0.178	437.886		2022-08-16 14:04:55	2.077	1.167	410.409		2022-08-21 15:24:21	0.114	-0.119	458.065
2022-08-16 12:38:15	1.383	0.1	437.886		2022-08-16 14:04:56	2.071	1.166	411.411		2022-08-21 15:24:22	0.114	-0.113	455.918
2022-08-16 12:38:16	1.316	0.07	438.459		2022-08-16 14:04:57	2.05	1.166	399.676		2022-08-21 15:24:23	0.114	-0.116	455.632
2022-08-16 12:38:17	1.296	0.068	437.743		2022-08-16 14:04:58	2.05	1.163	409.55		2022-08-21 15:24:24	0.107	-0.113	455.632
2022-08-16 12:38:18	1.302	0.062	438.029		2022-08-16 14:04:59	2.03	1.163	412.556		2022-08-21 15:24:25	0.114	-0.116	455.632
2022-08-16 12:38:19	1.336	0.056	437.171		2022-08-16 14:05:00	2.03	1.161	411.554		2022-08-21 15:24:26	0.114	-0.116	456.634
2022-08-16 12:38:20	2.024	0.056	436.741		2022-08-16 14:05:01	2.017	1.16	412.556		2022-08-21 15:24:27	0.107	-0.114	456.634
2022-08-16 12:38:21	2.204	0.055	436.885		2022-08-16 14:05:02	1.984	1.156	412.413		2022-08-21 15:24:28	0.107	0.012	455.775
2022-08-16 12:38:22	3.066	0.055	436.026		2022-08-16 14:05:03	1.957	1.156	413.128		2022-08-21 15:24:29	0.107	-0.11	455.632
2022-08-16 12:38:23	3.84	0.061	436.741		2022-08-16 14:05:04	1.937	1.151	413.128		2022-08-21 15:24:30	0.107	0.01	454.773
2022-08-16 12:38:24	4.001	0.064	436.885		2022-08-16 14:05:05	1.89	1.145	412.842		2022-08-21 15:24:31	0.114	-0.114	454.917
2022-08-16 12:38:25	4.635	0.076	436.885		2022-08-16 14:05:06	1.95	1.142	413.271		2022-08-21 15:24:32	0.114	0.009	455.632
2022-08-16 12:38:26	4.649	0.19	437.171		2022-08-16 14:05:07	1.95	1.142	412.985		2022-08-21 15:24:33	0.107	0.015	455.632
2022-08-16 12:38:27	4.722	0.202	436.741		2022-08-16 14:05:08	1.944	1.141	413.557		2022-08-21 15:24:34	0.107	0.015	455.632
2022-08-16 12:38:28	5.437	0.208	437.028		2022-08-16 14:05:09	1.93	1.133	413.987		2022-08-21 15:24:35	0.107	0.012	456.204
2022-08-16 12:38:29	5.51	0.212	437.6		2022-08-16 14:05:10	1.87	1.124	414.13		2022-08-21 15:24:36	0.114	0.013	455.203
2022-08-16 12:38:30	5.477	0.217	438.029		2022-08-16 14:05:11	1.85	1.047	413.987		2022-08-21 15:24:37	0.114	0.015	454.487
2022-08-16 12:38:31	4.755	0.223	438.602		2022-08-16 14:05:12	1.723	1.028	414.13		2022-08-21 15:24:38	0.107	0.013	454.917
2022-08-16 12:38:32	4.735	0.224	437.028		2022-08-16 14:05:13	1.476	1.037	414.273		2022-08-21 15:24:39	0.114	0.015	455.06
2022-08-16 12:38:33	5.677	0.226	437.6		2022-08-16 14:05:14	1.536	1.023	413.987		2022-08-21 15:24:40	0.114	-0.113	455.06
2022-08-16 12:38:34	8.022	0.23	437.886		2022-08-16 14:05:15	1.403	1.029	413.987		2022-08-21 15:24:41	0.114	0.013	454.201
2022-08-16 12:38:35	8.977	0.235	437.6		2022-08-16 14:05:16	1.376	1.014	414.13		2022-08-21 15:24:42	0.114	0.015	454.917
2022-08-16 12:38:36	9.003	0.242	440.892		2022-08-16 14:05:17	1.363	1.013	414.845		2022-08-21 15:24:43	0.107	0.015	454.487
2022-08-16 12:38:37	8.709	0.254	442.037		2022-08-16 14:05:18	1.363	1.014	414.845		2022-08-21 15:24:44	0.107	0.015	454.487
2022-08-16 12:38:38	8.128	0.38	441.178		2022-08-16 14:05:19	1.356	1.01	415.132		2022-08-21 15:24:45	0.114	0.016	455.06
2022-08-16 12:38:39	6.432	0.394	441.893		2022-08-16 14:05:20	1.349	1.007	416.42		2022-08-21 15:24:46	0.107	0.013	454.773
2022-08-16 12:38:40	4.689	0.398	452.484		2022-08-16 14:05:21	1.336	1.006	416.42		2022-08-21 15:24:47	0.114	0.009	456.204
2022-08-16 12:38:41	3.046	0.398	445.901		2022-08-16 14:05:22	1.322	1.007	418.137		2022-08-21 15:24:48	0.114	-0.111	455.775
2022-08-16 12:38:42	2.151	0.392	442.037		2022-08-16 14:05:23	1.322	1.006	418.566		2022-08-21 15:24:49	0.114	0.012	455.632
2022-08-16 12:38:43	1.603	0.278	442.752		2022-08-16 14:05:24	1.309	1	418.996		2022-08-21 15:24:50	0.114	0.015	455.632
2022-08-16 12:38:44	1.276	0.248	442.609		2022-08-16 14:05:25	1.309	1.001	419.711		2022-08-21 15:24:51	0.107	0.015	454.917
2022-08-16 12:38:45	1.209	0.241	441.035		2022-08-16 14:05:26	1.302	1	421.858		2022-08-21 15:24:52	0.107	0.016	455.632
2022-08-16 12:38:46	1.115	0.23	442.18		2022-08-16 14:05:27	1.296	0.998	418.423		2022-08-21 15:24:53	0.107	0.018	454.917
2022-08-16 12:38:47	0.554	0.224	440.892		2022-08-16 14:05:28	1.296	0.997	418.996		2022-08-21 15:24:54	0.107	0.016	455.346
2022-08-16 12:38:48	0.468	0.212	439.747		2022-08-16 14:05:29	1.289	0.997	419.425		2022-08-21 15:24:55	0.1	0.015	455.203
2022-08-16 12:38:49	0.421	0.212	439.461		2022-08-16 14:05:30	1.296	0.994	419.425		2022-08-21 15:24:56	0.114	0.015	454.63
2022-08-16 12:38:50	0.387	0.208	439.317		2022-08-16 14:05:31	1.296	0.995	431.017		2022-08-21 15:24:57	0.107	0.016	454.773
2022-08-16 12:38:51	0.374	0.199	437.457		2022-08-16 14:05:32	1.309	0.994	430.731		2022-08-21 15:24:58	0.114	0.018	453.772
2022-08-16 12:38:52	0.354	0.166	437.028		2022-08-16 14:05:33	1.309	0.992	418.709		2022-08-21 15:24:59	0.107	0.013	453.342
2022-08-16 12:38:53	0.361	0.064	436.741		2022-08-16 14:05:34	1.322	0.989	416.992		2022-08-21 15:25:00	0.114	0.013	440.033
2022-08-16 12:38:54	0.341	0.058	435.883		2022-08-16 14:05:35	1.336	0.994	416.277		2022-08-21 15:25:01	0.114	0.015	439.461
2022-08-16 12:38:55	0.327	0.05	434.738		2022-08-16 14:05:36	1.342	0.991	416.277		2022-08-21 15:25:02	0.114	0.016	438.602
2022-08-16 12:38:56	0.321	0.046	434.738		2022-08-16 14:05:37	1.363	0.991	416.706		2022-08-21 15:25:03	0.107	0.016	437.028
2022-08-16 12:38:57	0.341	0.042	434.452		2022-08-16 14:05:38	1.356	0.991	415.275		2022-08-21 15:25:04	0.107	0.015	437.028
2022-08-16 12:38:58	0.354	0.037	434.595		2022-08-16 14:05:39	1.336	0.991	415.561		2022-08-21 15:25:05	0.114	0.018	436.885
2022-08-16 12:38:59	0.354	0.034	435.167		2022-08-16 14:05:40	1.349	0.992	415.704		2022-08-21 15:25:06	0.114	0.015	437.028
2022-08-16 12:39:00	0.361	0.033	435.31		2022-08-16 14:05:41	1.342	0.992	416.277		2022-08-21 15:25:07	0.114	0.012	436.455
2022-08-16 12:39:01	0.307	0.033	435.453		2022-08-16 14:05:42	1.363	0.989	416.42		2022-08-21 15:25:08	0.107	0.015	437.171
2022-08-16 12:39:02	0.267	0.028	434.881		2022-08-16 14:05:43	1.396	0.991	416.849		2022-08-21 15:25:09	0.107	0.018	436.312
2022-08-16 12:39:03	0.234	0.025	435.167		2022-08-16 14:05:44	1.777	0.991	416.992		2022-08-21 15:25:10	0.114	0.018	436.312
2022-08-16 12:39:04	0.22	0.021	435.024		2022-08-16 14:05:45	1.83	0.991	416.992		2022-08-21 15:25:11	0.114	0.012	436.312
2022-08-16 12:39:05	2.211	0.024	435.024		2022-08-16 14:05:46	1.483	0.988	416.563		2022-08-21 15:25:12	0.107	0.013	436.598
2022-08-16 12:39:06	14.086	0.021	435.024		2022-08-16 14:05:47	1.456	0.989	418.137		2022-08-21 15:25:13	0.114	0.013	437.314
2022-08-16 12:39:07	39.346	0.058	439.031		2022-08-16 14:05:48	1.429	0.988	418.566		2022-08-21 15:25:14	0.114	0.015	436.598
2022-08-16 12:39:08	48.577	0.244	439.89		2022-08-16 14:05:49	1.409	0.988	418.423		2022-08-21 15:25:15	0.114	0.013	437.314
2022-08-16 12:39:09	46.179	0.593	456.204		2022-08-16 14:05:50	1.403	0.988	417.278		2022-08-21 15:25:16	0.107	0.016	437.028
2022-08-16 12:39:10	53.012	0.805	456.634		2022-08-16 14:05:51	1.456	0.988	417.135		2022-08-21 15:25:17	0.114	0.018	436.885
2022-08-16 12:39:11	63.003	1.156	458.637		2022-08-16 14:05:52	1.97	0.988	416.42		2022-08-21 15:25:18	0.107	0.018	436.455
2022-08-16 12:39:12	67.752	1.56	473.95		2022-08-16 14:05:53	2.057	0.988	416.563		2022-08-21 15:25:19	0.107	0.019	437.886
2022-08-16 12:39:13	70.143	1.922	473.95		2022-08-16 14:05:54	2.151	0.986	416.133		2022-08-21 15:25:20	0.107	0.021	437.171
2022-08-16 12:39:14	66.79	2.179	476.812		2022-08-16 14:05:55	2.832	0.986	415.132		2022-08-21 15:25:21	0.114	0.022	437.743
2022-08-16 12:39:15	88.15	2.517	481.249		2022-08-16 14:05:56	2.959	0.986	415.132		2022-08-21 15:25:22	0.107	0.021	437.171
2022-08-16 12:39:16	109.383	2.889	481.249		2022-08-16 14:05:57	3.026	0.986	414.416		2022-08-21 15:25:23	0.114	0.021	436.741
2022-08-16 12:39:17	118.045	3.285	511.875		2022-08-16 14:05:58	3.072	0.988	414.416		2022-08-21 15:25:24	0.114	0.019	436.598
2022-08-16 12:39:18	121.425	3.848	530.193		2022-08-16 14:05:59	3.767	0.989	414.559		2022-08-21 15:25:25	0.114	0.019	436.885
2022-08-16 12:39:19	134.142	4.572	529.907		2022-08-16 14:06:00	4.081	0.991	414.416		2022-08-21 15:25:26	0.114	0.018	436.885
2022-08-16 12:39:20	148.088	5.163	550.228		2022-08-16 14:06:01	4.702	0.995	414.989		2022-08-21 15:25:27	0.107	0.016	436.885
2022-08-16 12:39:21	135.21	5.743	570.55		2022-08-16 14:06:02	4.715	0.997	414.702		2022-08-21 15:25:28	0.114	0.019	437.886
2022-08-16 12:39:22	112.595	6.211	570.979		2022-08-16 14:06:03	4.642	1	414.702		2022-08-21 15:25:29	0.107	0.019	436.885
2022-08-16 12:39:23	96.96	6.586	585.577		2022-08-16 14:06:04	3.921	1.004	414.845		2022-08-21 15:25:30	0.114	0.021	436.885
2022-08-16 12:39:24	79.153	6.89	585.72		2022-08-16 14:06:05	3.794	1.007	415.275		2022-08-21 15:25:31	0.107	0.022	437.171
2022-08-16 12:39:25	66.022	6.945	589.011		2022-08-16 14:06:06	3.066	1.01	415.847		2022-08-21 15:25:32	0.114	0.021	436.598
2022-08-16 12:39:26	82.606	6.941	602.893		2022-08-16 14:06:07	2.905	1.008	415.704		2022-08-21 15:25:33	0.107	0.018	436.598
2022-08-16 12:39:27	108.561	6.949	602.464		2022-08-16 14:06:08	2.177	1.006	418.28		2022-08-21 15:25:34	0.107	0.019	436.741
2022-08-16 12:39:28	123.823	7.128	605.469		2022-08-16 14:06:09	2.111	1.004	418.423		2022-08-21 15:25:35	0.114	0.022	436.455
2022-08-16 12:39:29	121.465	7.454	605.183		2022-08-16 14:06:10	2.044	1	431.446		2022-08-21 15:25:36	0.114	0.022	437.314
2022-08-16 12:39:30	107.573	7.692	615.344		2022-08-16 14:06:11	1.97	0.995	431.876		2022-08-21 15:25:38	0.107	0.021	436.455
2022-08-16 12:39:31	115.26	7.844	623.501		2022-08-16 14:06:12	1.396	0.994	432.162		2022-08-21 15:25:39	0.107	0.021	435.883
2022-08-16 12:39:32	113.143	8.029	623.501		2022-08-16 14:06:13	1.356	0.991	432.591		2022-08-21 15:25:40	0.114	0.021	436.169
2022-08-16 12:39:33	111.012	8.111	616.202		2022-08-16 14:06:14	1.322	0.989	433.307		2022-08-21 15:25:41	0.114	0.019	435.597
2022-08-16 12:39:34	107.312	8.282	606.042		2022-08-16 14:06:15	1.316	0.985	433.307		2022-08-21 15:25:42	0.114	0.019	435.597
2022-08-16 12:39:35	107.479	8.337	606.185		2022-08-16 14:06:16	1.302	0.983	433.736		2022-08-21 15:25:43	0.114	0.021	435.74
2022-08-16 12:39:36	116.235	8.47	603.179		2022-08-16 14:06:17	1.289	0.98	433.021		2022-08-21 15:25:44	0.114	0.019	435.883
2022-08-16 12:39:37	120.51	8.509	588.582		2022-08-16 14:06:18	1.269	0.977	433.45		2022-08-21 15:25:45	0.114	0.019	435.597
2022-08-16 12:39:38	122.547	8.678	588.153		2022-08-16 14:06:19	1.256	0.974	433.45		2022-08-21 15:25:46	0.107	0.019	435.883
2022-08-16 12:39:39	110.565	8.837	603.322		2022-08-16 14:06:20	1.249	0.971	433.879		2022-08-21 15:25:47	0.114	0.018	435.74
2022-08-16 12:39:40	91.015	8.846	603.036		2022-08-16 14:06:21	1.249	0.973	433.736		2022-08-21 15:25:48	0.114	0.018	435.74
2022-08-16 12:39:41	67.572	8.836	604.897		2022-08-16 14:06:22	1.236	0.967	434.022		2022-08-21 15:25:49	0.114	0.016	436.598
2022-08-16 12:39:42	44.583	8.649	585.863		2022-08-16 14:06:23	1.242	0.959	434.165		2022-08-21 15:25:50	0.12	0.018	436.455
2022-08-16 12:39:43	29.855	8.289	587.008		2022-08-16 14:06:24	1.236	0.956	434.165		2022-08-21 15:25:51	0.114	0.018	436.169
2022-08-16 12:39:44	30.844	7.897	568.69		2022-08-16 14:06:25	1.249	0.954	433.879		2022-08-21 15:25:52	0.114	0.019	436.312
2022-08-16 12:39:45	94.475	7.529	568.833		2022-08-16 14:06:26	1.236	0.94	434.022		2022-08-21 15:25:53	0.114	0.018	436.312
2022-08-16 12:39:46	132.519	7.495	568.833		2022-08-16 14:06:27	1.242	0.916	435.453		2022-08-21 15:25:54	0.107	0.021	437.028
2022-08-16 12:39:47	106.644	7.541	568.69		2022-08-16 14:06:28	1.236	0.824	435.167		2022-08-21 15:25:55	0.114	0.019	436.598
2022-08-16 12:39:48	106.47	7.694	569.119		2022-08-16 14:06:29	1.242	0.823	437.743		2022-08-21 15:25:56	0.114	0.016	436.455
2022-08-16 12:39:49	116.983	7.732	570.407		2022-08-16 14:06:30	1.236	0.817	439.031		2022-08-21 15:25:57	0.114	0.016	437.028
2022-08-16 12:39:50	111.967	7.906	570.693		2022-08-16 14:06:31	1.236	0.812	439.461		2022-08-21 15:25:58	0.107	0.018	436.885
2022-08-16 12:39:51	136.112	8.086	571.122		2022-08-16 14:06:32	1.236	0.815	442.323		2022-08-21 15:25:59	0.107	0.016	436.312
2022-08-16 12:39:52	149.858	8.3	586.578		2022-08-16 14:06:33	1.236	0.811	455.346		2022-08-21 15:26:00	0.12	0.018	436.885
2022-08-16 12:39:53	123.849	8.638	589.154		2022-08-16 14:06:34	1.229	0.811	454.917		2022-08-21 15:26:01	0.107	0.016	436.598
2022-08-16 12:39:54	98.001	8.821	600.46		2022-08-16 14:06:35	1.289	0.809	456.92		2022-08-21 15:26:02	0.114	0.016	436.169
2022-08-16 12:39:55	84.376	8.839	584.861		2022-08-16 14:06:36	1.977	0.812	457.779		2022-08-21 15:26:03	0.114	0.013	436.741
2022-08-16 12:39:56	81.598	8.818	568.26		2022-08-16 14:06:37	2.097	0.815	457.349		2022-08-21 15:26:04	0.114	0.016	436.741
2022-08-16 12:39:57	79.647	8.666	567.831		2022-08-16 14:06:38	2.117	0.812	458.494		2022-08-21 15:26:05	0.114	0.016	436.885
2022-08-16 12:39:58	80.876	8.491	585.577		2022-08-16 14:06:39	2.104	0.814	458.351		2022-08-21 15:26:06	0.114	0.019	436.598
2022-08-16 12:39:59	78.746	8.441	585.72		2022-08-16 14:06:40	2.037	0.812	457.779		2022-08-21 15:26:07	0.114	0.016	436.169
2022-08-16 12:40:00	66.844	8.265	604.324		2022-08-16 14:06:41	1.403	0.811	456.92		2022-08-21 15:26:08	0.114	0.018	436.885
2022-08-16 12:40:01	50.22	8.066	584.575		2022-08-16 14:06:42	1.316	0.811	457.349		2022-08-21 15:26:09	0.114	0.016	436.741
2022-08-16 12:40:02	34.998	7.719	584.718		2022-08-16 14:06:43	1.269	0.814	446.33		2022-08-21 15:26:10	0.107	0.016	437.171
2022-08-16 12:40:03	25.227	7.313	567.258		2022-08-16 14:06:44	1.256	0.812	455.489		2022-08-21 15:26:11	0.107	0.018	436.885
2022-08-16 12:40:04	18.387	6.788	567.115		2022-08-16 14:06:45	1.236	0.812	442.466		2022-08-21 15:26:12	0.107	0.018	436.598
2022-08-16 12:40:05	15.148	6.382	549.513		2022-08-16 14:06:46	1.216	0.809	437.028		2022-08-21 15:26:13	0.12	0.015	436.598
2022-08-16 12:40:06	14.119	5.986	531.624		2022-08-16 14:06:47	1.209	0.805	438.029		2022-08-21 15:26:14	0.114	0.018	436.312
2022-08-16 12:40:07	14.053	5.547	532.196		2022-08-16 14:06:48	1.196	0.804	434.452		2022-08-21 15:26:15	0.114	0.013	436.169
2022-08-16 12:40:08	13.325	5.163	513.163		2022-08-16 14:06:49	1.202	0.801	433.736		2022-08-21 15:26:16	0.114	0.016	435.597
2022-08-16 12:40:09	13.832	4.782	493.127		2022-08-16 14:06:50	1.182	0.801	433.593		2022-08-21 15:26:17	0.107	0.013	436.169
2022-08-16 12:40:10	20.091	4.364	493.843		2022-08-16 14:06:51	1.196	0.798	432.877		2022-08-21 15:26:18	0.114	0.013	435.74
2022-08-16 12:40:11	64.847	4.034	480.247		2022-08-16 14:06:52	1.189	0.798	431.589		2022-08-21 15:26:19	0.114	0.01	435.74
2022-08-16 12:40:12	140.347	4.041	477.528		2022-08-16 14:06:53	1.196	0.796	431.303		2022-08-21 15:26:20	0.12	0.015	435.597
2022-08-16 12:40:13	204.766	4.61	477.814		2022-08-16 14:06:54	1.189	0.795	419.997		2022-08-21 15:26:21	0.114	0.013	435.74
2022-08-16 12:40:14	200.278	5.363	511.588		2022-08-16 14:06:55	1.189	0.792	418.28		2022-08-21 15:26:22	0.114	0.01	435.597
2022-08-16 12:40:15	203.771	6.19	511.588		2022-08-16 14:06:56	1.182	0.793	427.439		2022-08-21 15:26:23	0.107	0.013	435.597
2022-08-16 12:40:16	188.229	6.97	531.91		2022-08-16 14:06:57	1.189	0.792	417.278		2022-08-21 15:26:24	0.114	0.012	435.167
2022-08-16 12:40:17	188.589	7.904	551.946		2022-08-16 14:06:58	1.196	0.793	417.278		2022-08-21 15:26:25	0.114	0.012	434.595
2022-08-16 12:40:18	190.065	8.646	551.946		2022-08-16 14:06:59	1.182	0.792	417.278		2022-08-21 15:26:26	0.114	0.007	434.881
2022-08-16 12:40:19	175.031	9.192	586.578		2022-08-16 14:07:00	1.182	0.789	415.418		2022-08-21 15:26:27	0.107	0.013	435.024
2022-08-16 12:40:20	165.847	9.629	608.331		2022-08-16 14:07:01	1.169	0.79	415.847		2022-08-21 15:26:28	0.114	0.013	434.881
2022-08-16 12:40:21	141.93	10.03	614.342		2022-08-16 14:07:02	1.169	0.789	415.847		2022-08-21 15:26:29	0.114	0.015	434.881
2022-08-16 12:40:22	111.981	10.357	639.529		2022-08-16 14:07:03	1.169	0.787	415.99		2022-08-21 15:26:30	0.114	-0.107	434.595
2022-08-16 12:40:23	86.26	10.377	639.529		2022-08-16 14:07:04	1.162	0.79	415.99		2022-08-21 15:26:31	0.107	0.009	434.595
2022-08-16 12:40:24	60.672	10.172	641.247		2022-08-16 14:07:05	1.149	0.787	416.42		2022-08-21 15:26:32	0.114	0.009	435.31
2022-08-16 12:40:25	51.262	9.82	642.678		2022-08-16 14:07:06	1.149	0.784	416.42		2022-08-21 15:26:33	0.114	-0.114	435.024
2022-08-16 12:40:26	48.65	9.428	642.535		2022-08-16 14:07:07	1.149	0.783	416.563		2022-08-21 15:26:34	0.114	0.013	435.167
2022-08-16 12:40:27	53.74	9.027	643.68		2022-08-16 14:07:08	1.129	0.783	416.277		2022-08-21 15:26:35	0.12	-0.114	434.881
2022-08-16 12:40:28	62.709	8.69	657.561		2022-08-16 14:07:09	1.142	0.783	415.847		2022-08-21 15:26:36	0.114	0.015	434.881
2022-08-16 12:40:29	67.973	8.433	657.275		2022-08-16 14:07:10	1.142	0.778	415.99		2022-08-21 15:26:37	0.107	0.015	434.452
2022-08-16 12:40:30	73.069	8.096	623.501		2022-08-16 14:07:11	1.142	0.775	415.132		2022-08-21 15:26:38	0.114	0.015	435.597
2022-08-16 12:40:31	68.38	7.89	587.151		2022-08-16 14:07:12	1.122	0.775	415.418		2022-08-21 15:26:39	0.114	0.015	435.024
2022-08-16 12:40:32	62.629	7.68	588.296		2022-08-16 14:07:13	1.109	0.771	415.418		2022-08-21 15:26:40	0.114	0.018	435.597
2022-08-16 12:40:33	52.771	7.34	564.682		2022-08-16 14:07:14	1.102	0.775	415.704		2022-08-21 15:26:41	0.114	0.01	435.597
2022-08-16 12:40:34	46.165	6.976	563.824		2022-08-16 14:07:15	1.082	0.774	415.275		2022-08-21 15:26:42	0.114	0.015	435.597
2022-08-16 12:40:35	42.292	6.756	533.484		2022-08-16 14:07:16	1.082	0.772	415.418		2022-08-21 15:26:43	0.114	0.013	435.74
2022-08-16 12:40:36	35.906	6.415	515.882		2022-08-16 14:07:17	1.069	0.774	415.561		2022-08-21 15:26:44	0.107	0.015	435.597
2022-08-16 12:40:37	35.713	6.18	515.882		2022-08-16 14:07:18	1.069	0.76	415.418		2022-08-21 15:26:45	0.114	0.016	435.74
2022-08-16 12:40:38	35.967	5.801	499.853		2022-08-16 14:07:19	1.042	0.648	416.133		2022-08-21 15:26:46	0.114	0.012	435.597
2022-08-16 12:40:39	27.21	5.556	496.276		2022-08-16 14:07:20	1.042	0.637	416.133		2022-08-21 15:26:47	0.114	-0.114	435.453
2022-08-16 12:40:40	19.322	5.323	496.562		2022-08-16 14:07:21	1.009	0.631	415.704		2022-08-21 15:26:48	0.114	0.013	435.74
2022-08-16 12:40:41	29.915	4.983	496.132		2022-08-16 14:07:22	1.029	0.627	415.275		2022-08-21 15:26:49	0.114	0.013	435.597
2022-08-16 12:40:42	38.304	4.772	495.989		2022-08-16 14:07:23	1.055	0.628	414.845		2022-08-21 15:26:50	0.114	0.013	435.597
2022-08-16 12:40:43	49.619	4.582	495.56		2022-08-16 14:07:24	1.009	0.628	414.845		2022-08-21 15:26:51	0.114	0.01	436.169
2022-08-16 12:40:44	63.437	4.398	498.708		2022-08-16 14:07:25	1.029	0.627	414.989		2022-08-21 15:26:52	0.107	0.015	436.169
2022-08-16 12:40:45	65.221	4.355	498.565		2022-08-16 14:07:26	1.049	0.63	414.845		2022-08-21 15:26:53	0.114	0.015	436.169
2022-08-16 12:40:46	55.737	4.381	497.134		2022-08-16 14:07:27	1.075	0.625	415.132		2022-08-21 15:26:54	0.107	0.01	435.74
2022-08-16 12:40:47	46.833	4.282	496.419		2022-08-16 14:07:28	1.042	0.625	415.561		2022-08-21 15:26:55	0.114	0.015	435.883
2022-08-16 12:40:48	41.003	4.231	497.42		2022-08-16 14:07:29	1.082	0.625	415.132		2022-08-21 15:26:56	0.12	0.012	435.31
2022-08-16 12:40:49	39.233	4.202	495.274		2022-08-16 14:07:30	1.042	0.622	415.418		2022-08-21 15:26:57	0.114	0.01	435.883
2022-08-16 12:40:50	36.494	4.046	495.417		2022-08-16 14:07:31	1.042	0.624	415.704		2022-08-21 15:26:58	0.114	0.012	435.453
2022-08-16 12:40:51	30.683	4.009	494.129		2022-08-16 14:07:32	1.129	0.621	415.418		2022-08-21 15:26:59	0.114	-0.111	435.31
2022-08-16 12:40:52	27.19	3.835	494.558		2022-08-16 14:07:33	1.176	0.622	415.418		2022-08-21 15:27:00	0.127	0.01	435.883
2022-08-16 12:40:53	26.175	3.658	494.272		2022-08-16 14:07:34	1.182	0.621	415.275		2022-08-21 15:27:01	0.14	0.015	435.597
2022-08-16 12:40:54	30.65	3.529	494.558		2022-08-16 14:07:35	1.182	0.619	415.418		2022-08-21 15:27:02	0.127	0.01	435.883
2022-08-16 12:40:55	36.628	3.444	494.129		2022-08-16 14:07:36	1.169	0.618	415.418		2022-08-21 15:27:03	0.134	0.012	436.026
2022-08-16 12:40:56	38.338	3.288	494.272		2022-08-16 14:07:37	1.135	0.621	415.418		2022-08-21 15:27:04	0.12	0.013	436.169
2022-08-16 12:40:57	35.866	3.266	494.701		2022-08-16 14:07:38	1.122	0.618	415.561		2022-08-21 15:27:05	0.114	0.015	436.455
2022-08-16 12:40:58	31.351	3.242	493.27		2022-08-16 14:07:39	1.189	0.619	415.561		2022-08-21 15:27:06	0.114	0.016	436.026
2022-08-16 12:40:59	27.204	3.086	493.27		2022-08-16 14:07:40	1.256	0.621	415.99		2022-08-21 15:27:07	0.114	0.015	435.74
2022-08-16 12:41:00	104.594	3.079	479.245		2022-08-16 14:07:41	1.302	0.618	415.704		2022-08-21 15:27:08	0.114	0.013	435.74
2022-08-16 12:41:01	201.366	3.45	513.449		2022-08-16 14:07:42	1.276	0.619	415.561		2022-08-21 15:27:09	0.114	0.015	436.455
2022-08-16 12:41:02	230.487	4.223	513.735		2022-08-16 14:07:43	1.262	0.622	415.275		2022-08-21 15:27:10	0.12	0.015	436.455
2022-08-16 12:41:03	230.527	5.552	548.511		2022-08-16 14:07:44	1.249	0.621	415.418		2022-08-21 15:27:11	0.114	0.016	436.312
2022-08-16 12:41:04	230.487	6.944	548.654		2022-08-16 14:07:45	1.236	0.621	415.132		2022-08-21 15:27:12	0.114	0.01	436.312
2022-08-16 12:41:05	199.57	8.27	584.718		2022-08-16 14:07:46	1.236	0.621	415.132		2022-08-21 15:27:13	0.114	-0.113	436.169
2022-08-16 12:41:06	157.926	9.018	623.358		2022-08-16 14:07:47	1.242	0.619	414.989		2022-08-21 15:27:14	0.107	0.007	436.312
2022-08-16 12:41:07	126.608	9.546	623.358		2022-08-16 14:07:48	1.262	0.618	414.989		2022-08-21 15:27:15	0.114	0.01	435.883
2022-08-16 12:41:08	96.332	9.794	625.075		2022-08-16 14:07:49	1.289	0.618	414.989		2022-08-21 15:27:16	0.114	-0.117	436.169
2022-08-16 12:41:09	67.739	9.798	625.218		2022-08-16 14:07:50	1.302	0.619	415.132		2022-08-21 15:27:17	0.12	0.01	436.312
2022-08-16 12:41:10	53.953	9.608	638.814		2022-08-16 14:07:51	1.269	0.618	415.132		2022-08-21 15:27:18	0.12	0.009	435.74
2022-08-16 12:41:11	53.793	9.252	639.529		2022-08-16 14:07:52	1.249	0.616	414.989		2022-08-21 15:27:19	0.134	0.007	435.597
2022-08-16 12:41:12	59.991	8.888	640.102		2022-08-16 14:07:53	1.236	0.615	414.559		2022-08-21 15:27:20	0.14	0.015	435.74
2022-08-16 12:41:13	57.046	8.675	639.386		2022-08-16 14:07:54	1.202	0.615	414.702		2022-08-21 15:27:21	0.134	0.018	435.74
2022-08-16 12:41:14	45.985	8.3	641.247		2022-08-16 14:07:55	1.202	0.613	414.416		2022-08-21 15:27:22	0.127	0.013	435.597
2022-08-16 12:41:15	64.366	7.931	641.104		2022-08-16 14:07:56	1.182	0.613	414.559		2022-08-21 15:27:23	0.127	0.013	435.74
2022-08-16 12:41:16	117.291	7.716	641.247		2022-08-16 14:07:57	1.182	0.61	414.702		2022-08-21 15:27:24	0.127	0.01	435.74
2022-08-16 12:41:17	175.004	7.728	625.361		2022-08-16 14:07:58	1.162	0.61	414.416		2022-08-21 15:27:25	0.14	0.013	435.74
2022-08-16 12:41:18	163.202	8.066	625.361		2022-08-16 14:07:59	1.149	0.61	414.416		2022-08-21 15:27:26	0.147	-0.11	435.74
2022-08-16 12:41:19	153.471	8.32	621.784		2022-08-16 14:08:00	1.149	0.609	414.559		2022-08-21 15:27:27	0.16	0.015	435.74
2022-08-16 12:41:20	161.072	8.674	621.497		2022-08-16 14:08:01	1.129	0.609	414.702		2022-08-21 15:27:28	0.154	0.015	435.74
2022-08-16 12:41:21	169.314	8.876	604.61		2022-08-16 14:08:02	1.129	0.607	414.702		2022-08-21 15:27:29	0.154	0.01	435.597
2022-08-16 12:41:22	156.83	9.243	571.409		2022-08-16 14:08:03	1.109	0.606	414.845		2022-08-21 15:27:30	0.14	0.013	435.883
2022-08-16 12:41:23	134.182	9.596	576.561		2022-08-16 14:08:04	1.109	0.604	414.559		2022-08-21 15:27:31	0.127	0.01	435.883
2022-08-16 12:41:24	109.376	9.764	587.437		2022-08-16 14:08:05	1.109	0.603	414.559		2022-08-21 15:27:32	0.134	0.015	435.883
2022-08-16 12:41:25	88.537	9.773	587.151		2022-08-16 14:08:06	1.129	0.602	414.559		2022-08-21 15:27:33	0.14	0.009	435.883
2022-08-16 12:41:26	84.216	9.615	603.036		2022-08-16 14:08:07	1.102	0.602	415.275		2022-08-21 15:27:34	0.134	0.007	435.883
2022-08-16 12:41:27	93.727	9.436	606.471		2022-08-16 14:08:08	1.095	0.6	415.561		2022-08-21 15:27:35	0.134	0.013	435.883
2022-08-16 12:41:28	85.091	9.255	606.471		2022-08-16 14:08:09	1.069	0.599	415.132		2022-08-21 15:27:36	0.127	0.01	435.883
2022-08-16 12:41:29	78.118	9.063	610.049		2022-08-16 14:08:10	1.009	0.597	415.132		2022-08-21 15:27:37	0.14	0.012	435.74
2022-08-16 12:41:30	111.941	8.88	623.215		2022-08-16 14:08:11	1.035	0.597	414.989		2022-08-21 15:27:38	0.18	0.01	435.883
2022-08-16 12:41:31	130.742	8.864	623.072		2022-08-16 14:08:12	0.988	0.596	414.845		2022-08-21 15:27:39	0.22	0.015	435.883
2022-08-16 12:41:32	127.53	8.876	625.075		2022-08-16 14:08:13	0.808	0.596	415.132		2022-08-21 15:27:40	0.2	0.016	435.883
2022-08-16 12:41:33	105.569	8.932	614.199		2022-08-16 14:08:14	0.655	0.593	414.989		2022-08-21 15:27:41	0.194	0.018	436.312
2022-08-16 12:41:34	98.776	8.898	615.916		2022-08-16 14:08:15	0.995	0.59	415.132		2022-08-21 15:27:42	0.194	0.016	436.312
2022-08-16 12:41:35	89.613	8.867	601.605		2022-08-16 14:08:16	1.055	0.588	415.132		2022-08-21 15:27:43	0.187	0.016	436.026
2022-08-16 12:41:36	94.488	8.851	582.142		2022-08-16 14:08:17	1.055	0.588	415.275		2022-08-21 15:27:44	0.187	0.018	436.169
2022-08-16 12:41:37	88.557	8.825	581.57		2022-08-16 14:08:18	1.089	0.587	414.989		2022-08-21 15:27:45	0.167	0.016	436.598
2022-08-16 12:41:38	88.905	8.662	568.403		2022-08-16 14:08:19	1.095	0.585	415.418		2022-08-21 15:27:46	0.14	0.018	435.883
2022-08-16 12:41:39	122.24	8.507	568.26		2022-08-16 14:08:20	1.135	0.584	415.275		2022-08-21 15:27:47	0.134	0.019	435.597
2022-08-16 12:41:40	143.239	8.628	569.548		2022-08-16 14:08:21	1.162	0.581	414.845		2022-08-21 15:27:48	0.127	0.019	436.598
2022-08-16 12:41:41	182.899	8.821	571.981		2022-08-16 14:08:22	1.169	0.581	415.132		2022-08-21 15:27:49	0.127	0.013	436.741
2022-08-16 12:41:42	158.841	9.021	570.979		2022-08-16 14:08:23	1.169	0.585	414.845		2022-08-21 15:27:50	0.12	-0.113	436.169
2022-08-16 12:41:43	142.998	9.237	603.036		2022-08-16 14:08:24	1.196	0.584	414.845		2022-08-21 15:27:51	0.127	-0.116	435.883
2022-08-16 12:41:44	108.501	9.421	603.322		2022-08-16 14:08:25	1.229	0.579	414.845		2022-08-21 15:27:52	0.14	0.007	435.597
2022-08-16 12:41:45	80.75	9.427	606.757		2022-08-16 14:08:26	1.282	0.584	414.845		2022-08-21 15:27:53	0.134	-0.114	435.883
2022-08-16 12:41:46	90.454	9.274	606.185		2022-08-16 14:08:27	1.329	0.581	415.275		2022-08-21 15:27:54	0.127	0.013	436.026
2022-08-16 12:41:47	109.67	9.22	606.757		2022-08-16 14:08:28	1.389	0.579	415.275		2022-08-21 15:27:55	0.16	0.01	435.883
2022-08-16 12:41:48	111.313	9.159	604.897		2022-08-16 14:08:29	1.823	0.581	415.132		2022-08-21 15:27:56	0.207	0.015	435.31
2022-08-16 12:41:49	107.833	9.051	605.183		2022-08-16 14:08:30	2.044	0.585	414.989		2022-08-21 15:27:57	0.2	0.015	435.74
2022-08-16 12:41:50	97.16	9.027	604.897		2022-08-16 14:08:31	2.111	0.582	415.275		2022-08-21 15:27:58	0.167	0.013	435.74
2022-08-16 12:41:51	69.542	8.87	605.612		2022-08-16 14:08:32	2.131	0.587	415.132		2022-08-21 15:27:59	0.154	0.015	436.026
2022-08-16 12:41:52	46.86	8.819	589.727		2022-08-16 14:08:33	2.044	0.587	415.132		2022-08-21 15:28:00	0.14	0.018	435.74
2022-08-16 12:41:53	33.889	8.461	588.868		2022-08-16 14:08:34	1.396	0.593	414.989		2022-08-21 15:28:01	0.127	0.016	435.883
2022-08-16 12:41:54	51.95	8.081	569.548		2022-08-16 14:08:35	1.336	0.591	414.845		2022-08-21 15:28:02	0.127	0.016	435.74
2022-08-16 12:41:55	94.528	7.723	569.119		2022-08-16 14:08:36	1.316	0.594	414.989		2022-08-21 15:28:03	0.127	0.018	435.883
2022-08-16 12:41:56	116.102	7.662	569.548		2022-08-16 14:08:37	1.282	0.591	415.561		2022-08-21 15:28:04	0.127	0.019	436.312
2022-08-16 12:41:57	109.269	7.627	569.691		2022-08-16 14:08:38	1.269	0.59	415.418		2022-08-21 15:28:05	0.12	0.012	436.312
2022-08-16 12:41:58	90.274	7.661	569.978		2022-08-16 14:08:39	1.242	0.59	415.275		2022-08-21 15:28:06	0.14	0.013	436.026
2022-08-16 12:41:59	129.84	7.67	551.946		2022-08-16 14:08:40	1.222	0.585	415.704		2022-08-21 15:28:07	0.207	0.009	436.026
2022-08-16 12:42:00	169.033	7.751	548.368		2022-08-16 14:08:41	1.196	0.576	415.561		2022-08-21 15:28:08	0.24	0.016	435.597
2022-08-16 12:42:01	175.365	8.105	547.938		2022-08-16 14:08:42	1.149	0.569	415.704		2022-08-21 15:28:09	0.24	0.01	436.026
2022-08-16 12:42:02	183.734	8.496	567.258		2022-08-16 14:08:43	1.089	0.554	415.561		2022-08-21 15:28:10	0.207	0.018	435.597
2022-08-16 12:42:03	189.277	8.865	567.258		2022-08-16 14:08:44	1.042	0.505	415.704		2022-08-21 15:28:11	0.174	0.015	435.883
2022-08-16 12:42:04	186.278	9.39	598.457		2022-08-16 14:08:45	0.942	0.447	415.847		2022-08-21 15:28:12	0.167	0.016	436.026
2022-08-16 12:42:05	165.059	9.798	605.183		2022-08-16 14:08:46	1.022	0.446	415.847		2022-08-21 15:28:13	0.2	0.018	436.312
2022-08-16 12:42:06	135.344	10.149	604.897		2022-08-16 14:08:47	1.082	0.446	415.418		2022-08-21 15:28:14	0.24	0.018	435.597
2022-08-16 12:42:07	145.69	10.357	608.188		2022-08-16 14:08:48	1.162	0.446	415.132		2022-08-21 15:28:15	0.24	0.021	436.169
2022-08-16 12:42:08	175.104	10.569	636.81		2022-08-16 14:08:49	1.189	0.443	415.704		2022-08-21 15:28:16	0.287	0.021	435.74
2022-08-16 12:42:09	197.766	10.786	637.24		2022-08-16 14:08:50	1.209	0.438	415.275		2022-08-21 15:28:17	0.287	0.022	435.74
2022-08-16 12:42:10	182.364	11.145	659.136		2022-08-16 14:08:51	1.209	0.434	415.275		2022-08-21 15:28:18	0.24	0.022	436.026
2022-08-16 12:42:11	198.447	11.505	658.992		2022-08-16 14:08:52	1.209	0.435	415.275		2022-08-21 15:28:19	0.214	0.024	436.741
2022-08-16 12:42:12	230.467	11.781	663		2022-08-16 14:08:53	1.276	0.434	415.275		2022-08-21 15:28:20	0.18	0.024	436.312
2022-08-16 12:42:13	230.467	12.336	679.171		2022-08-16 14:08:54	1.329	0.434	415.275		2022-08-21 15:28:21	0.18	0.022	436.885
2022-08-16 12:42:14	216.421	12.754	679.6		2022-08-16 14:08:55	1.363	0.437	415.275		2022-08-21 15:28:22	0.254	0.022	436.885
2022-08-16 12:42:15	198.868	13.159	697.489		2022-08-16 14:08:56	1.383	0.437	415.275		2022-08-21 15:28:23	0.334	0.027	437.171
2022-08-16 12:42:16	201.092	13.643	715.951		2022-08-16 14:08:57	1.369	0.44	415.275		2022-08-21 15:28:24	0.321	0.028	436.885
2022-08-16 12:42:17	230.473	13.881	715.807		2022-08-16 14:08:58	1.356	0.44	415.99		2022-08-21 15:28:25	0.374	0.027	436.312
2022-08-16 12:42:18	230.473	14.339	718.097		2022-08-16 14:08:59	1.349	0.438	417.278		2022-08-21 15:28:26	0.461	0.031	436.885
2022-08-16 12:42:19	203.958	14.772	729.975		2022-08-16 14:09:00	1.329	0.438	417.135		2022-08-21 15:28:27	0.381	0.03	436.455
2022-08-16 12:42:20	154.98	14.824	730.548		2022-08-16 14:09:01	1.322	0.44	429.586		2022-08-21 15:28:28	0.314	0.034	436.312
2022-08-16 12:42:21	121.251	14.815	698.777		2022-08-16 14:09:02	1.316	0.443	418.423		2022-08-21 15:28:29	0.307	0.034	436.741
2022-08-16 12:42:22	109.429	14.627	680.459		2022-08-16 14:09:03	1.322	0.441	429.3		2022-08-21 15:28:30	0.254	0.034	436.598
2022-08-16 12:42:23	102.977	14.251	687.185		2022-08-16 14:09:04	1.329	0.443	430.445		2022-08-21 15:28:31	0.207	0.031	435.74
2022-08-16 12:42:24	104.814	13.854	678.312		2022-08-16 14:09:05	1.356	0.44	430.445		2022-08-21 15:28:32	0.18	0.031	435.74
2022-08-16 12:42:25	120.396	13.43	678.312		2022-08-16 14:09:06	1.984	0.435	431.733		2022-08-21 15:28:33	0.187	0.033	436.169
2022-08-16 12:42:26	118.292	12.914	675.593		2022-08-16 14:09:07	2.03	0.438	431.733		2022-08-21 15:28:34	0.187	0.03	435.597
2022-08-16 12:42:27	116.195	12.543	657.704		2022-08-16 14:09:08	1.944	0.441	432.019		2022-08-21 15:28:35	0.194	0.03	436.026
2022-08-16 12:42:28	167.403	12.332	657.132		2022-08-16 14:09:09	1.376	0.443	433.307		2022-08-21 15:28:36	0.194	0.03	435.597
2022-08-16 12:42:29	213.121	12.296	641.104		2022-08-16 14:09:10	1.336	0.44	433.164		2022-08-21 15:28:37	0.194	0.031	436.312
2022-08-16 12:42:30	224.943	12.507	640.531		2022-08-16 14:09:11	1.302	0.438	434.022		2022-08-21 15:28:38	0.207	0.03	435.74
2022-08-16 12:42:31	191.054	12.721	643.393		2022-08-16 14:09:12	1.276	0.438	433.45		2022-08-21 15:28:39	0.26	0.027	435.74
2022-08-16 12:42:32	144.908	12.905	655.558		2022-08-16 14:09:13	1.249	0.437	433.45		2022-08-21 15:28:40	0.381	0.028	435.74
2022-08-16 12:42:33	100.573	12.89	657.132		2022-08-16 14:09:14	1.236	0.435	433.021		2022-08-21 15:28:41	0.374	0.03	435.74
2022-08-16 12:42:34	85.899	12.555	623.358		2022-08-16 14:09:15	1.256	0.435	432.734		2022-08-21 15:28:42	0.401	0.031	435.883
2022-08-16 12:42:35	64.232	12.176	586.435		2022-08-16 14:09:16	1.296	0.437	432.305		2022-08-21 15:28:43	0.461	0.031	435.883
2022-08-16 12:42:36	59.15	11.708	586.149		2022-08-16 14:09:17	1.296	0.432	432.162		2022-08-21 15:28:44	0.481	0.033	435.597
2022-08-16 12:42:37	103.158	11.257	599.458		2022-08-16 14:09:18	1.249	0.429	432.591		2022-08-21 15:28:45	0.421	0.036	436.169
2022-08-16 12:42:38	134.182	10.936	604.038		2022-08-16 14:09:19	1.216	0.429	432.734		2022-08-21 15:28:46	0.387	0.036	435.883
2022-08-16 12:42:39	148.328	10.755	604.181		2022-08-16 14:09:20	1.176	0.425	433.593		2022-08-21 15:28:47	0.314	0.036	435.597
2022-08-16 12:42:40	162.882	10.744	618.921		2022-08-16 14:09:21	1.135	0.425	433.593		2022-08-21 15:28:48	0.281	0.039	437.028
2022-08-16 12:42:41	124.764	10.75	623.787		2022-08-16 14:09:22	1.082	0.422	433.021		2022-08-21 15:28:49	0.267	0.039	436.741
2022-08-16 12:42:42	84.082	10.599	623.644		2022-08-16 14:09:23	0.995	0.42	433.021		2022-08-21 15:28:50	0.247	0.039	436.312
2022-08-16 12:42:43	55.69	10.27	605.898		2022-08-16 14:09:24	1.015	0.419	432.877		2022-08-21 15:28:51	0.281	0.04	436.026
2022-08-16 12:42:44	38.264	9.84	606.471		2022-08-16 14:09:25	0.928	0.417	433.307		2022-08-21 15:28:52	0.254	0.037	436.598
2022-08-16 12:42:45	27.337	9.387	587.008		2022-08-16 14:09:26	1.009	0.414	433.164		2022-08-21 15:28:53	0.26	0.039	436.312
2022-08-16 12:42:46	50.38	8.858	585.72		2022-08-16 14:09:27	1.115	0.414	433.45		2022-08-21 15:28:54	0.24	0.04	437.743
2022-08-16 12:42:47	86.14	8.49	549.656		2022-08-16 14:09:28	1.162	0.416	433.736		2022-08-21 15:28:55	0.214	0.037	436.885
2022-08-16 12:42:48	95.771	8.274	519.03		2022-08-16 14:09:29	1.209	0.414	433.736		2022-08-21 15:28:56	0.234	0.039	437.743
2022-08-16 12:42:49	101.555	8.092	528.332		2022-08-16 14:09:30	1.276	0.414	433.736		2022-08-21 15:28:57	0.414	0.039	436.885
2022-08-16 12:42:50	98.97	7.946	531.91		2022-08-16 14:09:31	1.289	0.414	433.736		2022-08-21 15:28:58	0.548	0.039	437.028
2022-08-16 12:42:51	81.718	7.899	546.794		2022-08-16 14:09:32	1.296	0.416	433.879		2022-08-21 15:28:59	0.461	0.039	437.171
2022-08-16 12:42:52	59.156	7.723	546.794		2022-08-16 14:09:33	1.289	0.417	433.736		2022-08-21 15:29:00	0.314	0.039	437.028
2022-08-16 12:42:53	50.52	7.524	532.912		2022-08-16 14:09:34	1.276	0.416	433.45		2022-08-21 15:29:01	0.227	0.039	437.028
2022-08-16 12:42:54	38.338	7.135	530.765		2022-08-16 14:09:35	1.249	0.416	433.593		2022-08-21 15:29:02	0.2	0.04	437.886
2022-08-16 12:42:55	29.902	6.773	530.336		2022-08-16 14:09:36	1.236	0.414	433.593		2022-08-21 15:29:03	0.174	0.039	437.171
2022-08-16 12:42:56	29.835	6.403	511.445		2022-08-16 14:09:37	1.222	0.414	433.736		2022-08-21 15:29:04	0.167	0.037	436.741
2022-08-16 12:42:57	39.954	6.161	479.388		2022-08-16 14:09:38	1.236	0.417	433.307		2022-08-21 15:29:05	0.16	0.037	436.455
2022-08-16 12:42:58	44.656	5.761	479.675		2022-08-16 14:09:39	1.202	0.414	432.877		2022-08-21 15:29:06	0.2	0.037	437.171
2022-08-16 12:42:59	52.05	5.552	494.844		2022-08-16 14:09:40	1.155	0.411	432.877		2022-08-21 15:29:07	0.301	0.036	436.455
2022-08-16 12:43:00	55.91	5.36	494.415		2022-08-16 14:09:41	1.062	0.41	431.733		2022-08-21 15:29:08	0.347	0.036	437.314
2022-08-16 12:43:01	51.168	5.175	499.138		2022-08-16 14:09:42	0.594	0.41	429.443		2022-08-21 15:29:09	0.301	0.039	437.457
2022-08-16 12:43:02	37.55	4.995	496.419		2022-08-16 14:09:43	0.635	0.407	430.874		2022-08-21 15:29:10	0.254	0.039	436.885
2022-08-16 12:43:03	26.876	4.8	496.132		2022-08-16 14:09:44	1.102	0.407	428.298		2022-08-21 15:29:11	0.227	0.04	437.314
2022-08-16 12:43:04	22.869	4.601	495.274		2022-08-16 14:09:45	1.162	0.407	431.16		2022-08-21 15:29:12	0.281	0.04	438.029
2022-08-16 12:43:05	21.834	4.223	495.274		2022-08-16 14:09:46	1.176	0.404	431.16		2022-08-21 15:29:13	0.301	0.039	437.028
2022-08-16 12:43:06	22.515	4.016	477.671		2022-08-16 14:09:47	1.182	0.405	431.589		2022-08-21 15:29:14	0.26	0.04	437.6
2022-08-16 12:43:07	24.171	3.793	473.378		2022-08-16 14:09:48	1.209	0.403	431.589		2022-08-21 15:29:15	0.281	0.04	437.314
2022-08-16 12:43:08	19.149	3.529	462.644		2022-08-16 14:09:49	1.222	0.404	432.162		2022-08-21 15:29:16	0.381	0.043	437.314
2022-08-16 12:43:09	14.26	3.282	460.927		2022-08-16 14:09:50	1.222	0.403	429.013		2022-08-21 15:29:17	0.581	0.043	436.598
2022-08-16 12:43:10	11.622	3.08	459.353		2022-08-16 14:09:51	1.209	0.404	430.731		2022-08-21 15:29:18	1.222	0.046	437.028
2022-08-16 12:43:11	9.751	2.893	459.639		2022-08-16 14:09:52	1.196	0.404	420.141		2022-08-21 15:29:19	1.216	0.045	437.028
2022-08-16 12:43:12	8.148	2.727	459.353		2022-08-16 14:09:53	1.176	0.405	419.568		2022-08-21 15:29:20	0.581	0.049	437.6
2022-08-16 12:43:13	6.552	2.52	458.065		2022-08-16 14:09:54	1.149	0.401	416.992		2022-08-21 15:29:21	0.454	0.05	437.743
2022-08-16 12:43:14	6.232	2.327	458.208		2022-08-16 14:09:55	1.102	0.403	417.135		2022-08-21 15:29:22	1.222	0.052	438.173
2022-08-16 12:43:15	5.544	2.133	454.058		2022-08-16 14:09:56	1.042	0.404	417.421		2022-08-21 15:29:23	1.262	0.053	437.886
2022-08-16 12:43:16	5.383	1.946	436.026		2022-08-16 14:09:57	0.968	0.405	417.135		2022-08-21 15:29:24	0.574	0.053	438.029
2022-08-16 12:43:17	4.762	1.759	436.598		2022-08-16 14:09:58	0.721	0.407	416.849		2022-08-21 15:29:25	0.501	0.056	438.029
2022-08-16 12:43:18	26.022	1.653	436.885		2022-08-16 14:09:59	0.568	0.405	418.423		2022-08-21 15:29:26	0.521	0.059	437.457
2022-08-16 12:43:19	60.672	1.579	436.026		2022-08-16 14:10:00	0.521	0.405	416.992		2022-08-21 15:29:27	0.534	0.059	437.886
2022-08-16 12:43:20	98.015	1.744	436.026		2022-08-16 14:10:01	0.501	0.405	416.42		2022-08-21 15:29:28	1.135	0.061	437.171
2022-08-16 12:43:21	136.433	2.109	458.924		2022-08-16 14:10:02	0.508	0.407	416.706		2022-08-21 15:29:29	1.196	0.061	437.743
2022-08-16 12:43:22	164.825	2.647	459.353		2022-08-16 14:10:03	0.508	0.407	416.133		2022-08-21 15:29:30	1.249	0.061	437.743
2022-08-16 12:43:23	174.236	3.238	477.671		2022-08-16 14:10:04	0.494	0.405	415.561		2022-08-21 15:29:31	1.196	0.061	437.743
2022-08-16 12:43:24	190.793	3.995	478.244		2022-08-16 14:10:05	0.488	0.408	415.561		2022-08-21 15:29:32	0.528	0.061	437.886
2022-08-16 12:43:25	228.931	4.913	512.161		2022-08-16 14:10:06	0.481	0.405	415.561		2022-08-21 15:29:33	0.407	0.062	437.171
2022-08-16 12:43:26	224.075	5.8	533.055		2022-08-16 14:10:07	0.481	0.407	415.275		2022-08-21 15:29:34	0.307	0.062	437.171
2022-08-16 12:43:27	215.292	6.761	533.627		2022-08-16 14:10:08	0.461	0.405	415.418		2022-08-21 15:29:35	0.301	0.064	438.316
2022-08-16 12:43:28	208.393	7.719	568.26		2022-08-16 14:10:09	0.468	0.405	415.275		2022-08-21 15:29:36	0.334	0.062	437.171
2022-08-16 12:43:29	169.427	8.47	607.616		2022-08-16 14:10:10	0.468	0.403	415.275		2022-08-21 15:29:37	0.454	0.062	437.6
2022-08-16 12:43:30	130.001	8.859	607.043		2022-08-16 14:10:11	0.468	0.403	415.275		2022-08-21 15:29:38	1.196	0.062	437.028
2022-08-16 12:43:31	121.452	9.082	623.787		2022-08-16 14:10:12	0.461	0.403	415.275		2022-08-21 15:29:39	1.329	0.062	437.314
2022-08-16 12:43:32	112.862	9.243	639.386		2022-08-16 14:10:13	0.454	0.401	415.132		2022-08-21 15:29:40	1.256	0.062	437.028
2022-08-16 12:43:33	94.495	9.26	639.959		2022-08-16 14:10:14	0.461	0.398	415.132		2022-08-21 15:29:41	0.528	0.062	437.6
2022-08-16 12:43:34	112.849	9.234	648.259		2022-08-16 14:10:15	0.481	0.397	415.418		2022-08-21 15:29:42	0.354	0.062	437.457
2022-08-16 12:43:35	157.305	9.235	645.254		2022-08-16 14:10:16	0.501	0.395	415.275		2022-08-21 15:29:43	0.26	0.061	437.6
2022-08-16 12:43:36	144.688	9.394	660.424		2022-08-16 14:10:17	0.548	0.395	415.132		2022-08-21 15:29:44	0.227	0.061	437.314
2022-08-16 12:43:37	123.308	9.433	659.279		2022-08-16 14:10:18	0.541	0.394	415.132		2022-08-21 15:29:45	0.207	0.061	437.886
2022-08-16 12:43:38	111.032	9.449	659.565		2022-08-16 14:10:19	0.915	0.394	415.275		2022-08-21 15:29:46	0.2	0.062	437.028
2022-08-16 12:43:39	116.456	9.433	658.42		2022-08-16 14:10:20	1.075	0.392	415.275		2022-08-21 15:29:47	0.24	0.062	436.598
2022-08-16 12:43:40	127.189	9.422	641.533		2022-08-16 14:10:21	1.142	0.394	415.275		2022-08-21 15:29:48	0.447	0.059	437.028
2022-08-16 12:43:41	139.679	9.427	641.533		2022-08-16 14:10:22	1.182	0.391	415.132		2022-08-21 15:29:49	1.256	0.061	437.6
2022-08-16 12:43:42	157.725	9.568	625.791		2022-08-16 14:10:23	1.182	0.392	415.561		2022-08-21 15:29:50	1.236	0.062	436.598
2022-08-16 12:43:43	161.178	9.632	624.646		2022-08-16 14:10:24	1.189	0.385	415.704		2022-08-21 15:29:51	0.521	0.064	436.312
2022-08-16 12:43:44	149.911	9.82	622.785		2022-08-16 14:10:25	1.349	0.385	415.418		2022-08-21 15:29:52	0.521	0.064	436.455
2022-08-16 12:43:45	128.318	9.985	607.902		2022-08-16 14:10:26	2.331	0.392	415.275		2022-08-21 15:29:53	0.601	0.064	435.883
2022-08-16 12:43:46	98.703	9.994	607.759		2022-08-16 14:10:27	3.714	0.398	415.132		2022-08-21 15:29:54	1.269	0.064	435.883
2022-08-16 12:43:47	69.482	9.853	606.9		2022-08-16 14:10:28	3.747	0.404	415.418		2022-08-21 15:29:55	1.376	0.065	435.883
2022-08-16 12:43:48	48.55	9.607	604.897		2022-08-16 14:10:29	3.159	0.407	415.561		2022-08-21 15:29:56	1.376	0.068	436.312
2022-08-16 12:43:49	34.985	9.222	605.183		2022-08-16 14:10:30	2.972	0.413	415.704		2022-08-21 15:29:57	1.269	0.07	436.598
2022-08-16 12:43:50	63.631	8.848	585.147		2022-08-16 14:10:31	2.812	0.417	415.704		2022-08-21 15:29:58	0.554	0.074	436.598
2022-08-16 12:43:51	124.751	8.512	584.861		2022-08-16 14:10:32	2.197	0.42	415.99		2022-08-21 15:29:59	0.381	0.073	436.455
2022-08-16 12:43:52	186.492	8.5	566.4		2022-08-16 14:10:33	2.197	0.42	416.133		2022-08-21 15:30:00	0.334	0.074	436.598
2022-08-16 12:43:53	230.467	8.84	604.181		2022-08-16 14:10:34	2.217	0.42	416.133		2022-08-21 15:30:01	0.361	0.073	436.598
2022-08-16 12:43:54	230.473	9.244	604.181		2022-08-16 14:10:35	2.264	0.423	416.133		2022-08-21 15:30:02	0.387	0.076	436.741
2022-08-16 12:43:55	230.467	9.979	624.073		2022-08-16 14:10:36	2.778	0.425	416.277		2022-08-21 15:30:03	0.508	0.073	436.455
2022-08-16 12:43:56	216.882	10.731	638.814		2022-08-16 14:10:37	2.905	0.426	416.133		2022-08-21 15:30:04	1.216	0.073	436.312
2022-08-16 12:43:57	191.655	11.16	638.957		2022-08-16 14:10:38	2.892	0.428	416.133		2022-08-21 15:30:05	1.236	0.074	436.312
2022-08-16 12:43:58	172.66	11.557	642.535		2022-08-16 14:10:39	2.979	0.426	416.277		2022-08-21 15:30:06	0.548	0.079	437.6
2022-08-16 12:43:59	163.369	11.8	640.674		2022-08-16 14:10:40	2.952	0.428	416.563		2022-08-21 15:30:07	0.387	0.077	437.171
2022-08-16 12:44:00	147.473	11.98	641.247		2022-08-16 14:10:41	2.952	0.428	416.563		2022-08-21 15:30:08	0.367	0.073	436.885
2022-08-16 12:44:01	120.904	12.01	640.245		2022-08-16 14:10:42	2.972	0.431	416.563		2022-08-21 15:30:09	0.347	0.076	437.886
2022-08-16 12:44:02	89.466	11.947	636.095		2022-08-16 14:10:43	2.872	0.429	416.277		2022-08-21 15:30:10	1.162	0.077	437.028
2022-08-16 12:44:03	62.502	11.673	635.665		2022-08-16 14:10:44	2.258	0.429	415.99		2022-08-21 15:30:11	0.588	0.076	436.885
2022-08-16 12:44:04	42.606	11.147	626.649		2022-08-16 14:10:45	2.197	0.429	416.706		2022-08-21 15:30:12	0.441	0.076	437.028
2022-08-16 12:44:05	35.038	10.591	635.522		2022-08-16 14:10:46	2.197	0.429	415.99		2022-08-21 15:30:13	0.307	0.193	436.741
2022-08-16 12:44:06	81.878	9.985	640.674		2022-08-16 14:10:47	2.778	0.431	416.133		2022-08-21 15:30:14	0.254	0.071	437.314
2022-08-16 12:44:07	121.752	9.607	643.25		2022-08-16 14:10:48	2.812	0.431	416.133		2022-08-21 15:30:15	0.22	0.071	437.314
2022-08-16 12:44:08	134.189	9.418	642.821		2022-08-16 14:10:49	2.231	0.431	416.563		2022-08-21 15:30:16	0.267	0.071	436.885
2022-08-16 12:44:09	138.69	9.399	623.501		2022-08-16 14:10:50	2.177	0.431	416.992		2022-08-21 15:30:17	0.441	0.068	437.314
2022-08-16 12:44:10	133.574	9.403	623.501		2022-08-16 14:10:51	2.231	0.428	416.563		2022-08-21 15:30:18	0.401	0.07	436.455
2022-08-16 12:44:11	104.741	9.406	602.177		2022-08-16 14:10:52	2.986	0.426	417.565		2022-08-21 15:30:19	0.321	0.068	436.455
2022-08-16 12:44:12	72.755	9.25	568.69		2022-08-16 14:10:53	3.707	0.429	417.565		2022-08-21 15:30:20	0.274	0.068	437.314
2022-08-16 12:44:13	49.585	9.042	568.69		2022-08-16 14:10:54	3.8	0.428	417.421		2022-08-21 15:30:21	0.247	0.067	437.171
2022-08-16 12:44:14	74.004	8.842	550.228		2022-08-16 14:10:55	3.714	0.431	416.706		2022-08-21 15:30:22	0.394	0.068	439.031
2022-08-16 12:44:15	162.294	8.668	550.658		2022-08-16 14:10:56	2.965	0.432	417.421		2022-08-21 15:30:23	0.548	0.071	437.457
2022-08-16 12:44:16	230.46	8.839	550.658		2022-08-16 14:10:57	2.331	0.437	416.706		2022-08-21 15:30:24	1.202	0.073	437.171
2022-08-16 12:44:17	230.48	9.226	555.38		2022-08-16 14:10:58	2.104	0.44	417.278		2022-08-21 15:30:25	1.302	0.074	439.317
2022-08-16 12:44:18	230.473	9.964	602.464		2022-08-16 14:10:59	2.091	0.438	417.278		2022-08-21 15:30:26	1.222	0.077	438.173
2022-08-16 12:44:19	206.583	10.744	602.607		2022-08-16 14:11:00	5.41	0.434	417.135		2022-08-21 15:30:27	0.501	0.077	439.174
2022-08-16 12:44:20	163.95	11.159	625.505		2022-08-16 14:11:01	12.403	0.447	419.425		2022-08-21 15:30:28	0.347	0.08	437.886
2022-08-16 12:44:21	135.063	11.506	625.075		2022-08-16 14:11:02	12.43	0.587	417.278		2022-08-21 15:30:29	0.314	0.203	437.171
2022-08-16 12:44:22	122.2	11.527	638.098		2022-08-16 14:11:03	9.731	0.603	429.586		2022-08-21 15:30:30	0.287	0.083	437.314
2022-08-16 12:44:23	117.03	11.514	641.104		2022-08-16 14:11:04	6.392	0.609	429.872		2022-08-21 15:30:31	0.247	0.08	437.028
2022-08-16 12:44:24	94.876	11.341	640.817		2022-08-16 14:11:05	4.629	0.615	431.017		2022-08-21 15:30:32	0.207	0.077	436.455
2022-08-16 12:44:25	67.712	11.13	624.073		2022-08-16 14:11:06	4.642	0.616	431.303		2022-08-21 15:30:33	0.234	0.079	436.455
2022-08-16 12:44:26	47.775	10.747	623.644		2022-08-16 14:11:07	6.345	0.618	431.303		2022-08-21 15:30:34	0.494	0.082	436.598
2022-08-16 12:44:27	34.905	10.113	606.185		2022-08-16 14:11:08	12.189	0.625	431.017		2022-08-21 15:30:35	1.249	0.079	437.314
2022-08-16 12:44:28	25.881	9.583	604.753		2022-08-16 14:11:09	17.466	0.668	431.017		2022-08-21 15:30:36	1.329	0.076	436.312
2022-08-16 12:44:29	19.336	8.897	604.753		2022-08-16 14:11:10	26.917	0.792	432.162		2022-08-21 15:30:37	1.409	0.079	437.028
2022-08-16 12:44:30	15.783	8.464	597.884		2022-08-16 14:11:11	37.095	0.948	433.164		2022-08-21 15:30:38	1.363	0.203	436.885
2022-08-16 12:44:31	59.29	7.882	566.829		2022-08-16 14:11:12	42.813	1.008	433.307		2022-08-21 15:30:39	1.309	0.206	437.171
2022-08-16 12:44:32	92.825	7.505	566.829		2022-08-16 14:11:13	35.613	1.196	435.883		2022-08-21 15:30:40	1.282	0.209	437.171
2022-08-16 12:44:33	100.466	7.15	548.511		2022-08-16 14:11:14	25.16	1.521	435.31		2022-08-21 15:30:41	1.256	0.209	435.883
2022-08-16 12:44:34	130.001	7.134	529.907		2022-08-16 14:11:15	17.506	1.57	441.321		2022-08-21 15:30:42	1.269	0.212	435.74
2022-08-16 12:44:35	198.434	7.322	529.907		2022-08-16 14:11:16	13.238	1.622	440.033		2022-08-21 15:30:43	1.216	0.214	436.455
2022-08-16 12:44:36	230.48	7.882	511.302		2022-08-16 14:11:17	9.818	1.656	440.749		2022-08-21 15:30:44	0.574	0.214	436.455
2022-08-16 12:44:37	224.91	8.614	528.332		2022-08-16 14:11:18	8.188	1.582	440.033		2022-08-21 15:30:45	0.454	0.214	436.026
2022-08-16 12:44:38	230.473	9.219	528.475		2022-08-16 14:11:19	7.481	1.565	437.314		2022-08-21 15:30:46	0.501	0.212	436.169
2022-08-16 12:44:39	230.48	9.99	547.366		2022-08-16 14:11:20	8.102	1.548	437.314		2022-08-21 15:30:47	0.427	0.212	435.883
2022-08-16 12:44:40	230.487	10.955	547.509		2022-08-16 14:11:21	9.397	1.515	435.453		2022-08-21 15:30:48	0.354	0.212	436.598
2022-08-16 12:44:41	234.601	11.952	587.723		2022-08-16 14:11:22	8.943	1.402	435.024		2022-08-21 15:30:49	0.321	0.212	436.741
2022-08-16 12:44:42	232.905	12.923	639.816		2022-08-16 14:11:23	6.472	1.368	434.738		2022-08-21 15:30:50	0.301	0.214	436.455
2022-08-16 12:44:43	234.935	14.059	639.672		2022-08-16 14:11:24	5.597	1.216	435.31		2022-08-21 15:30:51	0.287	0.211	436.455
2022-08-16 12:44:44	245.328	15.002	694.341		2022-08-16 14:11:25	8.97	1.19	434.738		2022-08-21 15:30:52	0.314	0.209	436.026
2022-08-16 12:44:45	246.55	16.329	695.056		2022-08-16 14:11:26	11.508	1.182	435.167		2022-08-21 15:30:53	0.287	0.209	435.883
2022-08-16 12:44:46	251.893	17.679	734.555		2022-08-16 14:11:27	13.879	1.181	433.879		2022-08-21 15:30:54	0.24	0.208	436.741
2022-08-16 12:44:47	253.029	19.075	794.805		2022-08-16 14:11:28	19.142	1.179	433.879		2022-08-21 15:30:55	0.214	0.203	436.312
2022-08-16 12:44:48	234.16	20.416	800.386		2022-08-16 14:11:29	41.884	1.208	433.45		2022-08-21 15:30:56	0.247	0.206	435.883
2022-08-16 12:44:49	218.331	21.01	860.063		2022-08-16 14:11:30	62.215	1.549	433.45		2022-08-21 15:30:57	0.468	0.206	436.026
2022-08-16 12:44:50	150.913	21.151	841.602		2022-08-16 14:11:31	104.694	1.784	433.021		2022-08-21 15:30:58	0.501	0.082	435.883
2022-08-16 12:44:51	126.588	20.792	841.745		2022-08-16 14:11:32	127.509	2.304	457.063		2022-08-21 15:30:59	0.381	0.203	436.026
2022-08-16 12:44:52	200.398	20.391	822.854		2022-08-16 14:11:33	140.226	2.872	457.063		2022-08-21 15:31:00	0.294	0.202	436.455
2022-08-16 12:44:53	232.33	20.026	844.75		2022-08-16 14:11:34	146.351	3.429	476.24		2022-08-21 15:31:01	0.234	0.201	436.741
2022-08-16 12:44:54	238.582	20.173	844.464		2022-08-16 14:11:35	148.154	4.029	495.417		2022-08-21 15:31:02	0.207	0.086	436.312
2022-08-16 12:44:55	230.487	20.41	880.528		2022-08-16 14:11:36	159.609	4.79	495.417		2022-08-21 15:31:03	0.207	0.08	436.169
2022-08-16 12:44:56	230.467	20.596	880.671		2022-08-16 14:11:37	189.177	5.507	513.878		2022-08-21 15:31:04	0.227	0.079	435.74
2022-08-16 12:44:57	190.406	20.563	843.462		2022-08-16 14:11:38	230.42	6.219	549.513		2022-08-21 15:31:05	0.321	0.076	436.312
2022-08-16 12:44:58	133.207	20.202	812.407		2022-08-16 14:11:39	230.453	7.16	549.656		2022-08-21 15:31:06	0.474	0.077	437.028
2022-08-16 12:44:59	90.274	19.616	812.121		2022-08-16 14:11:40	230.447	8.27	601.891		2022-08-21 15:31:07	0.508	0.079	436.455
2022-08-16 12:45:00	62.569	18.551	752.444		2022-08-16 14:11:41	228.997	9.035	623.93		2022-08-21 15:31:08	1.189	0.08	436.598
2022-08-16 12:45:01	105.789	17.664	713.088		2022-08-16 14:11:42	207.204	9.798	623.644		2022-08-21 15:31:09	0.548	0.201	436.169
2022-08-16 12:45:02	204.599	16.911	712.087		2022-08-16 14:11:43	174.269	10.536	656.989		2022-08-21 15:31:10	0.434	0.203	436.312
2022-08-16 12:45:03	230.5	16.556	695.629		2022-08-16 14:11:44	170.856	10.931	657.275		2022-08-21 15:31:11	0.481	0.206	436.455
2022-08-16 12:45:04	238.255	16.728	680.745		2022-08-16 14:11:45	155.468	11.151	661.712		2022-08-21 15:31:12	0.401	0.206	436.455
2022-08-16 12:45:05	241.741	17.282	677.74		2022-08-16 14:11:46	124.15	11.329	678.885		2022-08-21 15:31:13	0.294	0.205	436.455
2022-08-16 12:45:06	253.189	18.104	732.838		2022-08-16 14:11:47	94.535	11.315	678.885		2022-08-21 15:31:14	0.294	0.208	436.312
2022-08-16 12:45:07	268.591	19.275	732.981		2022-08-16 14:11:48	74.485	11.12	659.994		2022-08-21 15:31:15	0.568	0.206	436.455
2022-08-16 12:45:08	277.601	20.779	789.796		2022-08-16 14:11:49	69.676	10.755	641.533		2022-08-21 15:31:16	1.142	0.208	436.455
2022-08-16 12:45:09	273.446	22.49	805.967		2022-08-16 14:11:50	68.721	10.303	641.247		2022-08-21 15:31:17	1.196	0.209	436.312
2022-08-16 12:45:10	246.289	23.945	805.824		2022-08-16 14:11:51	57.446	9.85	624.789		2022-08-21 15:31:18	1.242	0.211	436.455
2022-08-16 12:45:11	230.493	24.885	822.139		2022-08-16 14:11:52	49.552	9.427	624.646		2022-08-21 15:31:19	0.554	0.211	436.598
2022-08-16 12:45:12	208.393	25.396	817.416		2022-08-16 14:11:53	48.643	9.02	618.206		2022-08-21 15:31:20	0.401	0.211	437.028
2022-08-16 12:45:13	140.006	24.916	803.677		2022-08-16 14:11:54	63.578	8.674	586.006		2022-08-21 15:31:21	0.301	0.211	436.598
2022-08-16 12:45:14	95.009	24.217	780.35		2022-08-16 14:11:55	78.839	8.387	585.147		2022-08-21 15:31:22	0.414	0.211	436.455
2022-08-16 12:45:15	69.475	23.109	779.349		2022-08-16 14:11:56	78.779	8.105	551.516		2022-08-21 15:31:23	0.354	0.209	435.883
2022-08-16 12:45:16	90.321	21.78	785.073		2022-08-16 14:11:57	70.417	7.91	533.198		2022-08-21 15:31:24	0.294	0.209	436.026
2022-08-16 12:45:17	116.349	20.765	786.79		2022-08-16 14:11:58	59.216	7.708	533.198		2022-08-21 15:31:25	0.494	0.209	436.455
2022-08-16 12:45:18	122.313	19.657	786.504		2022-08-16 14:11:59	51.95	7.431	514.594		2022-08-21 15:31:26	2.024	0.208	436.455
2022-08-16 12:45:19	133.187	18.652	767.184		2022-08-16 14:12:00	45.678	6.991	514.737		2022-08-21 15:31:27	2.164	0.212	436.026
2022-08-16 12:45:20	147.593	17.741	736.129		2022-08-16 14:12:01	53.826	6.761	508.726		2022-08-21 15:31:28	2.064	0.215	436.598
2022-08-16 12:45:21	137.047	17.097	735.414		2022-08-16 14:12:02	66.049	6.563	487.403		2022-08-21 15:31:29	1.289	0.217	436.455
2022-08-16 12:45:22	148.128	16.504	714.376		2022-08-16 14:12:03	60.853	6.379	490.551		2022-08-21 15:31:30	0.561	0.218	437.314
2022-08-16 12:45:23	165.874	15.791	676.738		2022-08-16 14:12:04	55.837	6.195	495.131		2022-08-21 15:31:31	0.414	0.218	437.171
2022-08-16 12:45:24	143.699	15.383	675.736		2022-08-16 14:12:05	50.24	6.011	505.578		2022-08-21 15:31:32	0.488	0.218	436.455
2022-08-16 12:45:25	102.243	14.873	622.356		2022-08-16 14:12:06	46.987	5.798	503.145		2022-08-21 15:31:33	0.528	0.22	436.598
2022-08-16 12:45:26	69.749	14.444	622.499		2022-08-16 14:12:07	42.559	5.706	495.989		2022-08-21 15:31:34	0.447	0.218	437.171
2022-08-16 12:45:27	60.953	13.706	551.659		2022-08-16 14:12:08	35.913	5.513	494.558		2022-08-21 15:31:35	0.354	0.218	436.455
2022-08-16 12:45:28	85.098	12.922	551.946		2022-08-16 14:12:09	32.32	5.186	494.844		2022-08-21 15:31:36	0.341	0.217	436.598
2022-08-16 12:45:29	119.608	12.35	553.09		2022-08-16 14:12:10	39.112	4.992	484.827		2022-08-21 15:31:37	0.367	0.217	436.455
2022-08-16 12:45:30	137.675	11.956	564.969		2022-08-16 14:12:11	34.531	4.797	484.111		2022-08-21 15:31:38	0.474	0.217	436.885
2022-08-16 12:45:31	156.049	11.693	564.969		2022-08-16 14:12:12	53.886	4.618	478.1		2022-08-21 15:31:39	1.189	0.215	437.171
2022-08-16 12:45:32	176.921	11.518	588.582		2022-08-16 14:12:13	71.105	4.595	477.957		2022-08-21 15:31:40	1.202	0.217	437.314
2022-08-16 12:45:33	187.975	11.521	620.353		2022-08-16 14:12:14	66.016	4.595	477.671		2022-08-21 15:31:41	0.508	0.217	436.598
2022-08-16 12:45:34	189.999	11.557	620.353		2022-08-16 14:12:15	59.357	4.589	478.673		2022-08-21 15:31:42	0.367	0.218	436.885
2022-08-16 12:45:35	185.45	11.717	622.07		2022-08-16 14:12:16	59.089	4.578	480.676		2022-08-21 15:31:43	0.281	0.215	437.028
2022-08-16 12:45:36	192.637	11.811	623.072		2022-08-16 14:12:17	61.768	4.564	482.823		2022-08-21 15:31:44	0.234	0.217	436.598
2022-08-16 12:45:37	193.712	11.99	622.785		2022-08-16 14:12:18	64.359	4.564	491.982		2022-08-21 15:31:45	0.214	0.214	436.455
2022-08-16 12:45:38	183.727	12.163	623.93		2022-08-16 14:12:19	80.456	4.588	491.696		2022-08-21 15:31:46	0.227	0.214	436.455
2022-08-16 12:45:39	191.768	12.338	625.505		2022-08-16 14:12:20	83.662	4.619	482.394		2022-08-21 15:31:47	0.327	0.211	436.455
2022-08-16 12:45:40	201.854	12.516	625.075		2022-08-16 14:12:21	105.075	4.794	478.959		2022-08-21 15:31:48	0.401	0.212	436.455
2022-08-16 12:45:41	222.833	12.697	644.252		2022-08-16 14:12:22	122.44	5.004	479.388		2022-08-21 15:31:49	0.354	0.211	436.455
2022-08-16 12:45:42	229.525	12.913	662.141		2022-08-16 14:12:23	123.943	5.357	495.989		2022-08-21 15:31:50	0.327	0.211	436.312
2022-08-16 12:45:43	227.034	13.182	662.57		2022-08-16 14:12:24	116.389	5.596	513.449		2022-08-21 15:31:51	0.387	0.212	436.598
2022-08-16 12:45:44	187.247	13.513	679.028		2022-08-16 14:12:25	106.584	5.849	513.735		2022-08-21 15:31:52	0.534	0.212	436.455
2022-08-16 12:45:45	138.256	13.655	678.885		2022-08-16 14:12:26	108.414	6.165	516.025		2022-08-21 15:31:53	0.508	0.211	435.597
2022-08-16 12:45:46	113.777	13.485	695.629		2022-08-16 14:12:27	123.849	6.361	530.479		2022-08-21 15:31:54	0.374	0.212	436.169
2022-08-16 12:45:47	94.408	13.085	695.056		2022-08-16 14:12:28	123.976	6.569	530.622		2022-08-21 15:31:55	0.374	0.212	435.883
2022-08-16 12:45:48	98.249	12.632	675.88		2022-08-16 14:12:29	129.206	6.776	546.794		2022-08-21 15:31:56	0.354	0.214	435.74
2022-08-16 12:45:49	139.625	12.287	658.134		2022-08-16 14:12:30	129.179	6.998	547.366		2022-08-21 15:31:57	0.394	0.212	435.883
2022-08-16 12:45:50	130.675	11.968	657.704		2022-08-16 14:12:31	124.23	7.339	550.515		2022-08-21 15:31:58	0.421	0.214	435.883
2022-08-16 12:45:51	96.646	11.702	642.392		2022-08-16 14:12:32	120.503	7.549	553.377		2022-08-21 15:31:59	0.361	0.211	435.74
2022-08-16 12:45:52	75.433	11.321	638.671		2022-08-16 14:12:33	122.22	7.722	552.518		2022-08-21 15:32:00	0.314	0.211	436.026
2022-08-16 12:45:53	115.133	10.931	637.812		2022-08-16 14:12:34	140.64	7.91	566.686		2022-08-21 15:32:01	0.294	0.211	435.597
2022-08-16 12:45:54	191.194	10.72	625.075		2022-08-16 14:12:35	175.158	8.136	567.115		2022-08-21 15:32:02	0.301	0.209	435.74
2022-08-16 12:45:55	230.48	10.758	623.072		2022-08-16 14:12:36	188.302	8.522	587.151		2022-08-21 15:32:03	0.274	0.211	435.74
2022-08-16 12:45:56	237.6	11.303	622.785		2022-08-16 14:12:37	183.7	8.864	607.043		2022-08-21 15:32:04	0.247	0.209	435.74
2022-08-16 12:45:57	238.141	12.14	641.39		2022-08-16 14:12:38	230.44	9.391	607.043		2022-08-21 15:32:05	0.247	0.209	435.31
2022-08-16 12:45:58	233.913	13.082	660.996		2022-08-16 14:12:39	230.487	10.022	626.077		2022-08-21 15:32:06	0.22	0.208	435.453
2022-08-16 12:45:59	238.161	14.062	660.996		2022-08-16 14:12:40	231.776	11.139	658.277		2022-08-21 15:32:07	0.2	0.208	435.167
2022-08-16 12:46:00	239.797	14.848	680.03		2022-08-16 14:12:41	230.473	12.154	658.277		2022-08-21 15:32:08	0.194	0.209	435.453
2022-08-16 12:46:01	230.48	15.769	679.887		2022-08-16 14:12:42	230.447	12.963	680.459		2022-08-21 15:32:09	0.214	0.209	434.738
2022-08-16 12:46:02	217.363	16.526	699.636		2022-08-16 14:12:43	217.59	13.798	714.519		2022-08-21 15:32:10	0.207	0.206	434.881
2022-08-16 12:46:03	145.636	16.716	698.062		2022-08-16 14:12:44	168.212	14.079	714.949		2022-08-21 15:32:11	0.194	0.206	434.881
2022-08-16 12:46:04	96.278	16.526	697.775		2022-08-16 14:12:45	159.348	14.227	698.634		2022-08-21 15:32:12	0.194	0.206	435.024
2022-08-16 12:46:05	73.603	15.937	696.201		2022-08-16 14:12:46	167.624	14.205	695.772		2022-08-21 15:32:13	0.214	0.203	434.595
2022-08-16 12:46:06	102.537	15.222	696.201		2022-08-16 14:12:47	181.142	14.09	695.486		2022-08-21 15:32:14	0.22	0.199	434.881
2022-08-16 12:46:07	144.715	14.8	692.623		2022-08-16 14:12:48	173.354	14.076	697.919		2022-08-21 15:32:15	0.214	0.206	434.738
2022-08-16 12:46:08	171.003	14.411	680.316		2022-08-16 14:12:49	189.19	14.064	697.775		2022-08-21 15:32:16	0.234	0.205	435.31
2022-08-16 12:46:09	161.826	14.061	681.318		2022-08-16 14:12:50	227.314	14.08	711.8		2022-08-21 15:32:17	0.334	0.208	435.167
2022-08-16 12:46:10	156.71	13.841	693.339		2022-08-16 14:12:51	230.467	14.405	732.408		2022-08-21 15:32:18	0.374	0.206	435.31
2022-08-16 12:46:11	156.663	13.522	696.058		2022-08-16 14:12:52	230.587	14.814	732.408		2022-08-21 15:32:19	0.374	0.205	434.738
2022-08-16 12:46:12	156.764	13.297	696.201		2022-08-16 14:12:53	230.48	15.371	750.583		2022-08-21 15:32:20	0.347	0.206	435.31
2022-08-16 12:46:13	151.093	13.081	660.28		2022-08-16 14:12:54	230.467	15.949	750.154		2022-08-21 15:32:21	0.287	0.209	435.31
2022-08-16 12:46:14	148.976	12.889	624.789		2022-08-16 14:12:55	230.453	16.534	748.866		2022-08-21 15:32:22	0.267	0.211	435.453
2022-08-16 12:46:15	230.46	12.729	625.075		2022-08-16 14:12:56	220.495	16.886	737.99		2022-08-21 15:32:23	0.287	0.209	435.453
2022-08-16 12:46:16	230.467	12.916	623.93		2022-08-16 14:12:57	172.119	16.906	737.417		2022-08-21 15:32:24	0.347	0.212	435.31
2022-08-16 12:46:17	230.473	13.474	623.787		2022-08-16 14:12:58	122.814	16.706	718.956		2022-08-21 15:32:25	0.501	0.211	435.74
2022-08-16 12:46:18	233.305	14.012	623.501		2022-08-16 14:12:59	117.13	16.133	694.913		2022-08-21 15:32:26	0.554	0.211	435.883
2022-08-16 12:46:19	242.91	14.658	675.45		2022-08-16 14:13:00	129.146	15.588	694.913		2022-08-21 15:32:27	0.421	0.211	435.167
2022-08-16 12:46:20	247.211	15.568	676.023		2022-08-16 14:13:01	138.443	15.178	697.346		2022-08-21 15:32:28	0.307	0.214	435.453
2022-08-16 12:46:21	247.124	16.742	721.818		2022-08-16 14:13:02	137.835	14.811	712.373		2022-08-21 15:32:29	0.267	0.212	435.31
2022-08-16 12:46:22	243.271	17.925	750.154		2022-08-16 14:13:03	134.275	14.437	709.94		2022-08-21 15:32:30	0.381	0.211	435.883
2022-08-16 12:46:23	230.514	18.864	750.726		2022-08-16 14:13:04	118.753	14.049	698.491		2022-08-21 15:32:31	0.374	0.209	435.74
2022-08-16 12:46:24	230.453	19.472	787.935		2022-08-16 14:13:05	93.513	13.513	698.348		2022-08-21 15:32:32	0.294	0.209	434.738
2022-08-16 12:46:25	165.854	19.641	770.905		2022-08-16 14:13:06	98.823	12.917	696.774		2022-08-21 15:32:33	0.24	0.211	435.167
2022-08-16 12:46:26	111.226	19.281	770.333		2022-08-16 14:13:07	144.842	12.522	661.282		2022-08-21 15:32:34	0.26	0.212	435.453
2022-08-16 12:46:27	99.478	18.658	754.161		2022-08-16 14:13:08	173.401	12.319	661.282		2022-08-21 15:32:35	0.488	0.212	435.31
2022-08-16 12:46:28	134.168	17.925	753.589		2022-08-16 14:13:09	137.034	12.155	632.517		2022-08-21 15:32:36	0.541	0.212	435.31
2022-08-16 12:46:29	187.988	17.297	760.458		2022-08-16 14:13:10	96.352	11.95	602.321		2022-08-21 15:32:37	0.561	0.211	435.167
2022-08-16 12:46:30	203.637	16.906	767.47		2022-08-16 14:13:11	71.012	11.521	602.177		2022-08-21 15:32:38	0.514	0.212	435.167
2022-08-16 12:46:31	216.982	16.626	767.47		2022-08-16 14:13:12	67.732	11.119	551.516		2022-08-21 15:32:39	0.421	0.214	435.31
2022-08-16 12:46:32	230.447	16.498	752.158		2022-08-16 14:13:13	67.705	10.569	551.659		2022-08-21 15:32:40	0.367	0.215	435.31
2022-08-16 12:46:33	230.453	16.336	750.011		2022-08-16 14:13:14	67.725	9.99	550.658		2022-08-21 15:32:41	0.427	0.214	435.167
2022-08-16 12:46:34	210.563	16.318	750.44		2022-08-16 14:13:15	69.682	9.575	550.085		2022-08-21 15:32:42	0.561	0.217	435.31
2022-08-16 12:46:35	150.312	16.143	731.12		2022-08-16 14:13:16	77.904	9.079	549.656		2022-08-21 15:32:43	0.501	0.217	435.167
2022-08-16 12:46:36	102.163	15.779	731.263		2022-08-16 14:13:17	95.33	8.851	547.795		2022-08-21 15:32:44	0.401	0.217	436.455
2022-08-16 12:46:37	77.938	15.215	696.917		2022-08-16 14:13:18	112.141	8.669	533.484		2022-08-21 15:32:45	0.327	0.215	436.026
2022-08-16 12:46:38	78.893	14.655	658.134		2022-08-16 14:13:19	111.881	8.497	533.627		2022-08-21 15:32:46	0.434	0.217	436.026
2022-08-16 12:46:39	94.662	14.052	658.134		2022-08-16 14:13:20	92.732	8.461	533.771		2022-08-21 15:32:47	1.176	0.215	435.74
2022-08-16 12:46:40	94.502	13.431	607.902		2022-08-16 14:13:21	66.804	8.268	533.484		2022-08-21 15:32:48	1.149	0.218	435.74
2022-08-16 12:46:41	90.989	12.712	620.925		2022-08-16 14:13:22	70.27	7.97	533.914		2022-08-21 15:32:49	0.461	0.218	435.74
2022-08-16 12:46:42	82.319	12.145	620.639		2022-08-16 14:13:23	75.466	7.722	529.477		2022-08-21 15:32:50	0.414	0.218	435.74
2022-08-16 12:46:43	80.516	11.537	621.927		2022-08-16 14:13:24	84.256	7.526	529.334		2022-08-21 15:32:51	0.481	0.218	435.74
2022-08-16 12:46:44	78.011	11.108	604.61		2022-08-16 14:13:25	129.159	7.356	514.594		2022-08-21 15:32:52	0.414	0.217	435.597
2022-08-16 12:46:45	77.063	10.562	603.895		2022-08-16 14:13:26	142.531	7.511	531.481		2022-08-21 15:32:53	0.307	0.215	435.024
2022-08-16 12:46:46	165.6	10.011	584.289		2022-08-16 14:13:27	121.371	7.65	531.338		2022-08-21 15:32:54	0.454	0.217	435.597
2022-08-16 12:46:47	223.581	9.993	584.575		2022-08-16 14:13:28	135.571	7.713	547.652		2022-08-21 15:32:55	0.574	0.218	435.883
2022-08-16 12:46:48	186.292	10.183	587.866		2022-08-16 14:13:29	160.15	7.894	552.947		2022-08-21 15:32:56	1.229	0.218	435.883
2022-08-16 12:46:49	127.403	10.374	602.321		2022-08-16 14:13:30	149.924	8.103	553.09		2022-08-21 15:32:57	1.242	0.22	435.883
2022-08-16 12:46:50	84.704	10.302	602.321		2022-08-16 14:13:31	148.381	8.302	571.838		2022-08-21 15:32:58	0.568	0.22	435.883
2022-08-16 12:46:51	65.288	10.009	567.258		2022-08-16 14:13:32	175.218	8.542	603.179		2022-08-21 15:32:59	0.414	0.221	435.597
2022-08-16 12:46:52	123.248	9.78	567.115		2022-08-16 14:13:33	184.602	8.849	601.319		2022-08-21 15:33:00	0.307	0.22	436.312
2022-08-16 12:46:53	179.138	9.618	548.511		2022-08-16 14:13:34	155.929	9.051	607.473		2022-08-21 15:33:01	0.267	0.22	435.74
2022-08-16 12:46:54	207.337	9.78	571.695		2022-08-16 14:13:35	117.431	9.234	607.616		2022-08-21 15:33:02	0.234	0.22	435.597
2022-08-16 12:46:55	196.597	9.994	573.842		2022-08-16 14:13:36	86.193	9.228	604.324		2022-08-21 15:33:03	0.22	0.218	435.453
2022-08-16 12:46:56	183.012	10.233	621.641		2022-08-16 14:13:37	63.551	9.041	587.723		2022-08-21 15:33:04	0.2	0.217	435.597
2022-08-16 12:46:57	200.304	10.59	626.077		2022-08-16 14:13:38	46.9	8.843	587.58		2022-08-21 15:33:05	0.2	0.217	435.167
2022-08-16 12:46:58	207.658	10.937	625.791		2022-08-16 14:13:39	36.708	8.466	570.264		2022-08-21 15:33:06	0.187	0.215	435.31
2022-08-16 12:46:59	200.258	11.163	641.247		2022-08-16 14:13:40	29.121	7.937	570.264		2022-08-21 15:33:07	0.194	0.212	435.167
2022-08-16 12:47:00	188.142	11.509	658.992		2022-08-16 14:13:41	30.603	7.515	566.686		2022-08-21 15:33:08	0.194	0.211	434.738
2022-08-16 12:47:01	193.432	11.705	659.136		2022-08-16 14:13:42	59.136	6.946	550.228		2022-08-21 15:33:09	0.2	0.212	435.024
2022-08-16 12:47:02	204.171	11.947	675.164		2022-08-16 14:13:43	143.92	6.75	550.085		2022-08-21 15:33:10	0.287	0.211	435.024
2022-08-16 12:47:03	206.429	12.154	661.568		2022-08-16 14:13:44	193.358	6.929	532.912		2022-08-21 15:33:11	0.314	0.212	434.881
2022-08-16 12:47:04	203.711	12.354	661.855		2022-08-16 14:13:45	230.433	7.434	564.969		2022-08-21 15:33:12	0.26	0.212	435.024
2022-08-16 12:47:05	207.063	12.547	659.422		2022-08-16 14:13:46	230.607	8.118	559.387		2022-08-21 15:33:13	0.227	0.214	434.738
2022-08-16 12:47:06	224.462	12.758	659.279		2022-08-16 14:13:47	230.607	9.038	596.167		2022-08-21 15:33:14	0.214	0.212	434.881
2022-08-16 12:47:07	228.864	13.091	691.765		2022-08-16 14:13:48	230.48	10.037	609.047		2022-08-21 15:33:15	0.24	0.214	435.31
2022-08-16 12:47:08	230.46	13.482	717.525		2022-08-16 14:13:49	230.453	11.135	607.473		2022-08-21 15:33:16	0.234	0.214	435.883
2022-08-16 12:47:09	212.814	13.698	717.239		2022-08-16 14:13:50	198.675	11.723	624.503		2022-08-21 15:33:17	0.22	0.214	435.74
2022-08-16 12:47:10	186.171	13.89	713.518		2022-08-16 14:13:51	194.54	12.152	624.646		2022-08-21 15:33:18	0.207	0.212	434.595
2022-08-16 12:47:11	161.793	14.021	714.376		2022-08-16 14:13:52	165.86	12.362	639.529		2022-08-21 15:33:19	0.194	0.212	434.022
2022-08-16 12:47:12	154.145	13.881	697.203		2022-08-16 14:13:53	120.49	12.488	642.249		2022-08-21 15:33:20	0.194	0.211	434.309
2022-08-16 12:47:13	130.862	13.698	680.316		2022-08-16 14:13:54	118.125	12.296	642.821		2022-08-21 15:33:21	0.187	0.211	434.738
2022-08-16 12:47:14	95.851	13.482	680.888		2022-08-16 14:13:55	187.053	12.143	659.994		2022-08-21 15:33:22	0.18	0.212	434.309
2022-08-16 12:47:15	105.796	12.917	676.881		2022-08-16 14:13:56	220.141	12.169	660.137		2022-08-21 15:33:23	0.187	0.209	434.595
2022-08-16 12:47:16	165.694	12.546	675.88		2022-08-16 14:13:57	227.882	12.467	674.878		2022-08-21 15:33:24	0.301	0.209	434.309
2022-08-16 12:47:17	176.681	12.366	675.164		2022-08-16 14:13:58	230.433	12.724	697.346		2022-08-21 15:33:25	0.447	0.208	434.595
2022-08-16 12:47:18	160.15	12.332	675.021		2022-08-16 14:13:59	230.46	13.112	697.489		2022-08-21 15:33:26	0.394	0.211	434.165
2022-08-16 12:47:19	151.901	12.169	660.424		2022-08-16 14:14:00	230.44	13.7	731.12		2022-08-21 15:33:27	0.307	0.211	434.738
2022-08-16 12:47:20	155.815	12.143	660.137		2022-08-16 14:14:01	221.083	14.191	699.779		2022-08-21 15:33:28	0.307	0.214	434.309
2022-08-16 12:47:21	156.684	11.984	645.826		2022-08-16 14:14:02	187.173	14.416	709.511		2022-08-21 15:33:29	0.381	0.214	434.881
2022-08-16 12:47:22	160.043	11.959	646.256		2022-08-16 14:14:03	171.137	14.432	681.175		2022-08-21 15:33:30	0.468	0.215	434.881
2022-08-16 12:47:23	149.938	11.925	642.535		2022-08-16 14:14:04	163.102	14.336	662.141		2022-08-21 15:33:31	0.514	0.215	435.024
2022-08-16 12:47:24	141.529	11.745	640.388		2022-08-16 14:14:05	187.4	14.245	661.998		2022-08-21 15:33:32	0.574	0.218	435.31
2022-08-16 12:47:25	137.955	11.702	640.817		2022-08-16 14:14:06	221.497	14.243	643.68		2022-08-21 15:33:33	1.142	0.218	435.453
2022-08-16 12:47:26	166.589	11.536	625.791		2022-08-16 14:14:07	228.75	14.377	643.68		2022-08-21 15:33:34	1.176	0.218	435.453
2022-08-16 12:47:27	203.023	11.539	625.934		2022-08-16 14:14:08	230.433	14.462	671.872		2022-08-21 15:33:35	0.548	0.22	436.026
2022-08-16 12:47:28	230.447	11.722	622.929		2022-08-16 14:14:09	230.447	14.757	694.913		2022-08-21 15:33:36	0.494	0.221	435.883
2022-08-16 12:47:29	230.467	12.117	645.254		2022-08-16 14:14:10	230.453	14.839	695.056		2022-08-21 15:33:37	0.434	0.223	435.74
2022-08-16 12:47:30	230.447	12.519	644.109		2022-08-16 14:14:11	231.362	15.212	716.523		2022-08-21 15:33:38	0.354	0.22	435.883
2022-08-16 12:47:31	230.453	12.908	678.169		2022-08-16 14:14:12	241.561	15.849	735.557		2022-08-21 15:33:39	0.294	0.22	435.883
2022-08-16 12:47:32	230.467	13.419	692.48		2022-08-16 14:14:13	230.928	16.715	735.271		2022-08-21 15:33:40	0.26	0.218	437.314
2022-08-16 12:47:33	230.46	13.856	690.477		2022-08-16 14:14:14	230.453	17.261	738.562		2022-08-21 15:33:41	0.247	0.218	436.455
2022-08-16 12:47:34	230.46	14.263	697.203		2022-08-16 14:14:15	210.082	17.478	739.278		2022-08-21 15:33:42	0.22	0.217	436.312
2022-08-16 12:47:35	230.3	14.649	710.369		2022-08-16 14:14:16	161.512	17.46	750.583		2022-08-21 15:33:43	0.207	0.217	436.312
2022-08-16 12:47:36	190.239	14.824	710.226		2022-08-16 14:14:17	133.273	17.101	733.124		2022-08-21 15:33:44	0.2	0.215	435.74
2022-08-16 12:47:37	134.195	14.832	716.523		2022-08-16 14:14:18	109.957	16.602	732.838		2022-08-21 15:33:45	0.207	0.215	435.74
2022-08-16 12:47:38	91.289	14.783	716.38		2022-08-16 14:14:19	90.207	15.856	714.09		2022-08-21 15:33:46	0.24	0.212	436.026
2022-08-16 12:47:39	63.404	14.252	696.631		2022-08-16 14:14:20	71.92	15.169	696.058		2022-08-21 15:33:47	0.26	0.212	435.883
2022-08-16 12:47:40	44.896	13.664	677.454		2022-08-16 14:14:21	69.549	14.444	696.058		2022-08-21 15:33:48	0.227	0.215	435.453
2022-08-16 12:47:41	79.086	12.752	677.311		2022-08-16 14:14:22	73.636	13.684	679.171		2022-08-21 15:33:49	0.207	0.215	435.74
2022-08-16 12:47:42	198.701	12.329	677.024		2022-08-16 14:14:23	85.298	12.898	659.422		2022-08-21 15:33:50	0.194	0.215	436.169
2022-08-16 12:47:43	185.443	12.151	678.599		2022-08-16 14:14:24	112.689	12.246	658.706		2022-08-21 15:33:51	0.194	0.215	436.169
2022-08-16 12:47:44	152.689	12.118	678.456		2022-08-16 14:14:25	142.223	11.772	640.817		2022-08-21 15:33:52	0.207	0.212	436.169
2022-08-16 12:47:45	151.861	11.967	657.704		2022-08-16 14:14:26	151.661	11.531	640.245		2022-08-21 15:33:53	0.227	0.214	436.312
2022-08-16 12:47:46	149.39	11.82	625.648		2022-08-16 14:14:27	149.944	11.41	622.785		2022-08-21 15:33:54	0.301	0.215	436.885
2022-08-16 12:47:47	136.413	11.73	625.648		2022-08-16 14:14:28	119.181	11.3	604.61		2022-08-21 15:33:55	0.441	0.214	436.312
2022-08-16 12:47:48	123.442	11.675	606.9		2022-08-16 14:14:29	84.022	10.958	604.467		2022-08-21 15:33:56	0.508	0.214	435.883
2022-08-16 12:47:49	116.409	11.494	607.473		2022-08-16 14:14:30	58.108	10.569	551.659		2022-08-21 15:33:57	0.468	0.215	436.312
2022-08-16 12:47:50	129.092	11.176	583.144		2022-08-16 14:14:31	50.313	9.981	516.597		2022-08-21 15:33:58	0.414	0.215	435.883
2022-08-16 12:47:51	146.391	11.117	567.545		2022-08-16 14:14:32	107.406	9.479	516.454		2022-08-21 15:33:59	0.381	0.214	436.026
2022-08-16 12:47:52	164.778	10.964	568.117		2022-08-16 14:14:33	149.811	9.249	533.771		2022-08-21 15:34:00	0.361	0.217	436.169
2022-08-16 12:47:53	171.671	10.969	552.518		2022-08-16 14:14:34	159.268	9.238	549.942		2022-08-21 15:34:01	0.294	0.218	435.883
2022-08-16 12:47:54	184.622	11.121	587.151		2022-08-16 14:14:35	144.982	9.26	550.944		2022-08-21 15:34:02	0.26	0.217	435.883
2022-08-16 12:47:55	184.555	11.16	587.008		2022-08-16 14:14:36	120.47	9.259	565.255		2022-08-21 15:34:03	0.274	0.218	436.455
2022-08-16 12:47:56	164.859	11.332	618.921		2022-08-16 14:14:37	129.306	9.237	565.541		2022-08-21 15:34:04	0.421	0.218	435.453
2022-08-16 12:47:57	118.954	11.347	619.208		2022-08-16 14:14:38	148.468	9.237	568.69		2022-08-21 15:34:05	0.367	0.215	435.167
2022-08-16 12:47:58	80.723	11.3	605.326		2022-08-16 14:14:39	157.017	9.289	583.716		2022-08-21 15:34:06	0.381	0.215	435.024
2022-08-16 12:47:59	61.674	10.943	590.156		2022-08-16 14:14:40	136.319	9.418	584.575		2022-08-21 15:34:07	0.341	0.217	435.453
2022-08-16 12:48:00	66.924	10.551	588.296		2022-08-16 14:14:41	117.958	9.421	603.609		2022-08-21 15:34:08	0.267	0.215	435.453
2022-08-16 12:48:01	86.841	9.991	569.405		2022-08-16 14:14:42	123.936	9.402	603.179		2022-08-21 15:34:09	0.24	0.215	435.167
2022-08-16 12:48:02	94.568	9.623	566.686		2022-08-16 14:14:43	127.737	9.293	587.151		2022-08-21 15:34:10	0.227	0.217	435.31
2022-08-16 12:48:03	96.272	9.387	566.543		2022-08-16 14:14:44	126.528	9.255	573.698		2022-08-21 15:34:11	0.207	0.215	435.74
2022-08-16 12:48:04	101.668	9.07	566.543		2022-08-16 14:14:45	112.635	9.235	573.985		2022-08-21 15:34:12	0.2	0.215	435.883
2022-08-16 12:48:05	120.637	8.877	566.829		2022-08-16 14:14:46	96.732	9.124	602.321		2022-08-21 15:34:13	0.194	0.215	436.455
2022-08-16 12:48:06	177.081	8.861	567.258		2022-08-16 14:14:47	79.674	8.904	606.614		2022-08-21 15:34:14	0.194	0.214	436.455
2022-08-16 12:48:07	201.947	9.033	571.266		2022-08-16 14:14:48	73.75	8.834	606.614		2022-08-21 15:34:15	0.227	0.214	435.597
2022-08-16 12:48:08	189.13	9.256	570.407		2022-08-16 14:14:49	79.641	8.493	587.723		2022-08-21 15:34:16	0.22	0.211	435.31
2022-08-16 12:48:09	185.584	9.611	599.172		2022-08-16 14:14:50	81.137	8.286	567.831		2022-08-21 15:34:17	0.207	0.214	435.453
2022-08-16 12:48:10	183.627	9.967	585.863		2022-08-16 14:14:51	80.623	8.08	567.831		2022-08-21 15:34:18	0.194	0.212	435.453
2022-08-16 12:48:11	170.148	10.184	586.149		2022-08-16 14:14:52	75.486	7.841	566.829		2022-08-21 15:34:19	0.247	0.212	435.167
2022-08-16 12:48:12	126.114	10.413	569.262		2022-08-16 14:14:53	67.692	7.545	565.398		2022-08-21 15:34:20	0.26	0.211	435.31
2022-08-16 12:48:13	119.682	10.535	569.548		2022-08-16 14:14:54	80.596	7.303	564.539		2022-08-21 15:34:21	0.287	0.211	436.741
2022-08-16 12:48:14	106.036	10.368	578.135		2022-08-16 14:14:55	98.035	7.114	550.085		2022-08-21 15:34:22	0.514	0.212	435.883
2022-08-16 12:48:15	87.909	10.168	586.292		2022-08-16 14:14:56	134.242	6.982	550.085		2022-08-21 15:34:23	0.561	0.214	436.169
2022-08-16 12:48:16	92.905	9.966	586.149		2022-08-16 14:14:57	156.61	7.15	537.491		2022-08-21 15:34:24	1.162	0.215	435.74
2022-08-16 12:48:17	97.915	9.636	586.722		2022-08-16 14:14:58	158.534	7.526	545.792		2022-08-21 15:34:25	0.514	0.22	435.74
2022-08-16 12:48:18	95.33	9.43	585.863		2022-08-16 14:14:59	143.686	7.732	550.371		2022-08-21 15:34:26	0.381	0.22	435.31
2022-08-16 12:48:19	75.44	9.225	586.006		2022-08-16 14:15:00	135.838	8.008	566.257		2022-08-21 15:34:27	0.307	0.22	435.167
2022-08-16 12:48:20	63.478	8.876	569.405		2022-08-16 14:15:01	112.201	8.103	565.398		2022-08-21 15:34:28	0.26	0.221	436.312
2022-08-16 12:48:21	84.163	8.68	567.258		2022-08-16 14:15:02	99.952	8.114	552.089		2022-08-21 15:34:29	0.234	0.218	435.74
2022-08-16 12:48:22	132.392	8.479	567.545		2022-08-16 14:15:03	109.536	8.109	550.944		2022-08-21 15:34:30	0.267	0.22	435.883
2022-08-16 12:48:23	213.642	8.499	584.289		2022-08-16 14:15:04	149.984	8.194	550.658		2022-08-21 15:34:31	0.341	0.218	435.453
2022-08-16 12:48:24	225.184	8.848	603.465		2022-08-16 14:15:05	183.8	8.436	569.834		2022-08-21 15:34:32	0.287	0.218	435.883
2022-08-16 12:48:25	230.46	9.228	603.752		2022-08-16 14:15:06	204.405	8.785	605.326		2022-08-21 15:34:33	0.234	0.22	435.31
2022-08-16 12:48:26	230.48	9.798	618.492		2022-08-16 14:15:07	202.214	9.047	605.612		2022-08-21 15:34:34	0.207	0.22	435.74
2022-08-16 12:48:27	233.412	10.738	619.78		2022-08-16 14:15:08	184.568	9.44	623.644		2022-08-21 15:34:35	0.194	0.217	436.026
2022-08-16 12:48:28	230.48	11.634	624.932		2022-08-16 14:15:09	166.749	9.801	641.819		2022-08-21 15:34:36	0.194	0.217	435.31
2022-08-16 12:48:29	230.46	12.522	625.218		2022-08-16 14:15:10	175.178	10.013	641.962		2022-08-21 15:34:37	0.18	0.212	435.31
2022-08-16 12:48:30	230.433	13.137	656.989		2022-08-16 14:15:11	185.49	10.373	654.699		2022-08-21 15:34:38	0.187	0.214	434.738
2022-08-16 12:48:31	186.726	13.713	678.312		2022-08-16 14:15:12	170.209	10.731	654.699		2022-08-21 15:34:39	0.187	0.212	434.738
2022-08-16 12:48:32	132.712	13.995	678.456		2022-08-16 14:15:13	147.52	10.784	660.28		2022-08-21 15:34:40	0.187	0.212	434.881
2022-08-16 12:48:33	124.751	13.872	679.744		2022-08-16 14:15:14	143.866	10.928	644.538		2022-08-21 15:34:41	0.207	0.211	434.738
2022-08-16 12:48:34	121.285	13.681	681.031		2022-08-16 14:15:15	142.724	10.934	644.968		2022-08-21 15:34:42	0.22	0.212	434.881
2022-08-16 12:48:35	98.83	13.315	681.318		2022-08-16 14:15:16	129.967	10.921	639.959		2022-08-21 15:34:43	0.247	0.212	435.167
2022-08-16 12:48:36	109.396	12.904	695.343		2022-08-16 14:15:17	133.487	10.771	640.96		2022-08-21 15:34:44	0.254	0.211	435.453
2022-08-16 12:48:37	169.868	12.541	696.631		2022-08-16 14:15:18	133.36	10.752	642.678		2022-08-21 15:34:45	0.227	0.214	434.881
2022-08-16 12:48:38	158.327	12.371	696.487		2022-08-16 14:15:19	109.596	10.591	656.703		2022-08-21 15:34:46	0.287	0.212	435.167
2022-08-16 12:48:39	140.707	12.323	680.459		2022-08-16 14:15:20	125.666	10.437	657.704		2022-08-21 15:34:47	0.347	0.214	435.883
2022-08-16 12:48:40	184.401	12.163	673.304		2022-08-16 14:15:21	131.831	10.235	639.1		2022-08-21 15:34:48	0.301	0.214	435.31
2022-08-16 12:48:41	230.447	12.185	663.143		2022-08-16 14:15:22	131.657	10.18	623.787		2022-08-21 15:34:49	0.327	0.215	435.31
2022-08-16 12:48:42	230.447	12.527	677.74		2022-08-16 14:15:23	142.163	10.152	623.215		2022-08-21 15:34:50	0.414	0.215	435.31
2022-08-16 12:48:43	230.453	12.907	678.026		2022-08-16 14:15:24	146.431	10.144	620.209		2022-08-21 15:34:51	0.394	0.217	435.597
2022-08-16 12:48:44	230.453	13.385	680.459		2022-08-16 14:15:25	123.048	10.092	608.188		2022-08-21 15:34:52	0.347	0.217	436.455
2022-08-16 12:48:45	182.805	13.688	662.284		2022-08-16 14:15:26	92.712	9.994	615.344		2022-08-21 15:34:53	0.327	0.22	436.026
2022-08-16 12:48:46	139.879	13.851	662.427		2022-08-16 14:15:27	71.993	9.782	586.006		2022-08-21 15:34:54	0.321	0.218	435.883
2022-08-16 12:48:47	105.529	13.686	655.128		2022-08-16 14:15:28	77.918	9.431	585.863		2022-08-21 15:34:55	0.314	0.218	435.883
2022-08-16 12:48:48	91.102	13.43	652.266		2022-08-16 14:15:29	79.681	9.197	566.257		2022-08-21 15:34:56	0.294	0.22	436.598
2022-08-16 12:48:49	97.921	12.904	643.107		2022-08-16 14:15:30	91.055	8.864	553.377		2022-08-21 15:34:57	0.441	0.218	436.169
2022-08-16 12:48:50	104.64	12.518	641.676		2022-08-16 14:15:31	119.648	8.822	553.949		2022-08-21 15:34:58	0.508	0.218	435.024
2022-08-16 12:48:51	95.397	12.13	641.962		2022-08-16 14:15:32	166.709	8.816	551.659		2022-08-21 15:34:59	0.468	0.22	435.31
2022-08-16 12:48:52	106.537	11.702	642.249		2022-08-16 14:15:33	172.513	8.858	566.4		2022-08-21 15:35:00	0.474	0.22	435.31
2022-08-16 12:48:53	123.061	11.334	642.964		2022-08-16 14:15:34	177.014	9.044	566.257		2022-08-21 15:35:01	0.481	0.221	435.883
2022-08-16 12:48:54	136.566	11.132	643.107		2022-08-16 14:15:35	158.727	9.259	568.976		2022-08-21 15:35:02	0.434	0.221	435.167
2022-08-16 12:48:55	133.36	10.952	641.39		2022-08-16 14:15:36	143.78	9.446	569.978		2022-08-21 15:35:03	0.374	0.223	435.453
2022-08-16 12:48:56	111.092	10.772	639.1		2022-08-16 14:15:37	135.464	9.607	572.124		2022-08-21 15:35:04	0.374	0.224	435.597
2022-08-16 12:48:57	103.078	10.582	639.243		2022-08-16 14:15:38	129.34	9.624	586.722		2022-08-21 15:35:05	0.314	0.223	435.31
2022-08-16 12:48:58	145.409	10.373	606.9		2022-08-16 14:15:39	121.278	9.626	586.865		2022-08-21 15:35:06	0.254	0.221	435.167
2022-08-16 12:48:59	174.216	10.354	607.329		2022-08-16 14:15:40	109.396	9.611	569.548		2022-08-21 15:35:07	0.22	0.221	434.738
2022-08-16 12:49:00	147.974	10.401	570.693		2022-08-16 14:15:41	95.504	9.476	566.972		2022-08-21 15:35:08	0.2	0.22	435.453
2022-08-16 12:49:01	115.307	10.464	568.833		2022-08-16 14:15:42	86.347	9.296	567.115		2022-08-21 15:35:09	0.194	0.22	435.024
2022-08-16 12:49:02	86.113	10.226	568.833		2022-08-16 14:15:43	80.536	9.067	569.978		2022-08-21 15:35:10	0.187	0.218	434.738
2022-08-16 12:49:03	70.237	10.002	567.258		2022-08-16 14:15:44	67.752	8.862	584.575		2022-08-21 15:35:11	0.187	0.217	435.31
2022-08-16 12:49:04	62.656	9.664	566.4		2022-08-16 14:15:45	71.993	8.668	584.718		2022-08-21 15:35:12	0.214	0.215	435.453
2022-08-16 12:49:05	76.963	9.382	566.543		2022-08-16 14:15:46	130.762	8.473	586.006		2022-08-21 15:35:13	0.234	0.215	434.738
2022-08-16 12:49:06	122.453	9.05	554.092		2022-08-16 14:15:47	171.718	8.484	584.861		2022-08-21 15:35:14	0.26	0.215	435.31
2022-08-16 12:49:07	149.744	9.014	567.831		2022-08-16 14:15:48	174.744	8.695	586.578		2022-08-21 15:35:15	0.267	0.217	435.167
2022-08-16 12:49:08	145.676	9.027	567.688		2022-08-16 14:15:49	136.519	8.858	569.262		2022-08-21 15:35:16	0.281	0.215	435.31
2022-08-16 12:49:09	138.136	9.048	577.849		2022-08-16 14:15:50	98.135	8.882	569.119		2022-08-21 15:35:17	0.294	0.215	436.026
2022-08-16 12:49:10	143.893	9.197	572.697		2022-08-16 14:15:51	74.558	8.859	566.829		2022-08-21 15:35:18	0.294	0.214	434.738
2022-08-16 12:49:11	165.82	9.241	571.838		2022-08-16 14:15:52	53.813	8.717	548.797		2022-08-21 15:35:19	0.267	0.214	435.024
2022-08-16 12:49:12	155.201	9.428	582.714		2022-08-16 14:15:53	42.712	8.46	548.368		2022-08-21 15:35:20	0.254	0.215	434.738
2022-08-16 12:49:13	143.005	9.61	579.423		2022-08-16 14:15:54	48.537	8.081	530.193		2022-08-21 15:35:21	0.301	0.215	435.024
2022-08-16 12:49:14	116.148	9.635	572.983		2022-08-16 14:15:55	89.359	7.725	531.624		2022-08-21 15:35:22	0.341	0.214	435.31
2022-08-16 12:49:15	128.999	9.636	584.289		2022-08-16 14:15:56	117.892	7.665	531.338		2022-08-21 15:35:23	0.367	0.214	435.31
2022-08-16 12:49:16	155.976	9.679	583.716		2022-08-16 14:15:57	101.902	7.621	531.91		2022-08-21 15:35:24	0.307	0.215	435.883
2022-08-16 12:49:17	162.294	9.804	601.605		2022-08-16 14:15:58	76.221	7.53	531.91		2022-08-21 15:35:25	0.247	0.217	435.883
2022-08-16 12:49:18	166.722	9.984	599.745		2022-08-16 14:15:59	66.917	7.34	531.051		2022-08-21 15:35:26	0.214	0.217	435.597
2022-08-16 12:49:19	158.547	10.161	605.04		2022-08-16 14:16:00	68.527	7.128	530.336		2022-08-21 15:35:27	0.2	0.215	435.74
2022-08-16 12:49:20	163.115	10.343	623.644		2022-08-16 14:16:01	103.926	6.957	530.336		2022-08-21 15:35:28	0.194	0.214	435.74
2022-08-16 12:49:21	176.099	10.56	623.215		2022-08-16 14:16:02	148.435	6.973	533.055		2022-08-21 15:35:29	0.194	0.214	435.167
2022-08-16 12:49:22	199.596	10.756	641.819		2022-08-16 14:16:03	153.337	7.3	532.912		2022-08-21 15:35:30	0.18	0.212	434.738
2022-08-16 12:49:23	201.927	11.081	643.966		2022-08-16 14:16:04	144.888	7.648	548.94		2022-08-21 15:35:31	0.174	0.214	435.31
2022-08-16 12:49:24	161.432	11.319	643.68		2022-08-16 14:16:05	150.232	7.887	548.94		2022-08-21 15:35:32	0.18	0.215	434.881
2022-08-16 12:49:25	115.521	11.462	656.703		2022-08-16 14:16:06	155.735	8.106	548.797		2022-08-21 15:35:33	0.194	0.212	434.881
2022-08-16 12:49:26	88.604	11.328	625.075		2022-08-16 14:16:07	147.44	8.441	549.37		2022-08-21 15:35:34	0.214	0.214	434.738
2022-08-16 12:49:27	76.368	11.124	625.218		2022-08-16 14:16:08	114.191	8.628	565.255		2022-08-21 15:35:35	0.24	0.214	434.738
2022-08-16 12:49:28	88.671	10.759	605.326		2022-08-16 14:16:09	101.942	8.662	565.112		2022-08-21 15:35:36	0.347	0.214	434.881
2022-08-16 12:49:29	82.519	10.385	605.04		2022-08-16 14:16:10	90.194	8.652	568.976		2022-08-21 15:35:37	0.501	0.214	435.167
2022-08-16 12:49:30	65.187	9.993	603.895		2022-08-16 14:16:11	73.71	8.485	566.114		2022-08-21 15:35:38	0.588	0.215	434.738
2022-08-16 12:49:31	47.788	9.605	602.034		2022-08-16 14:16:12	109.383	8.32	566.114		2022-08-21 15:35:39	0.461	0.218	435.31
2022-08-16 12:49:32	35.719	9.113	601.033		2022-08-16 14:16:13	190.94	8.453	550.801		2022-08-21 15:35:40	0.321	0.22	435.31
2022-08-16 12:49:33	52.858	8.809	566.114		2022-08-16 14:16:14	199.363	8.807	550.944		2022-08-21 15:35:41	0.314	0.217	435.31
2022-08-16 12:49:34	76.328	8.372	565.255		2022-08-16 14:16:15	181.99	9.042	585.434		2022-08-21 15:35:42	0.394	0.22	434.165
2022-08-16 12:49:35	61.734	8.081	532.626		2022-08-16 14:16:16	176.253	9.416	620.496		2022-08-21 15:35:43	0.427	0.22	434.738
2022-08-16 12:49:36	75.426	7.725	530.336		2022-08-16 14:16:17	172.613	9.709	621.641		2022-08-21 15:35:44	0.541	0.22	434.595
2022-08-16 12:49:37	96.278	7.523	530.336		2022-08-16 14:16:18	183.112	10.002	622.213		2022-08-21 15:35:45	0.434	0.221	435.024
2022-08-16 12:49:38	130.007	7.474	517.313		2022-08-16 14:16:19	179.806	10.379	622.213		2022-08-21 15:35:46	0.314	0.218	434.309
2022-08-16 12:49:39	130.415	7.517	513.163		2022-08-16 14:16:20	159.742	10.735	622.642		2022-08-21 15:35:47	0.247	0.221	434.881
2022-08-16 12:49:40	122.193	7.65	513.592		2022-08-16 14:16:21	128.999	10.769	621.641		2022-08-21 15:35:48	0.227	0.221	434.881
2022-08-16 12:49:41	144.628	7.719	509.871		2022-08-16 14:16:22	229.766	10.942	621.927		2022-08-21 15:35:49	0.394	0.221	434.595
2022-08-16 12:49:42	151.107	7.915	529.191		2022-08-16 14:16:23	235.242	11.476	617.92		2022-08-21 15:35:50	0.501	0.221	434.881
2022-08-16 12:49:43	123.181	8.108	529.048		2022-08-16 14:16:24	237.466	12.338	660.853		2022-08-21 15:35:51	0.488	0.221	434.738
2022-08-16 12:49:44	91.817	8.273	548.797		2022-08-16 14:16:25	233.833	13.336	660.71		2022-08-21 15:35:52	0.447	0.224	434.881
2022-08-16 12:49:45	85.946	8.273	548.797		2022-08-16 14:16:26	230.46	14.248	714.949		2022-08-21 15:35:53	0.361	0.223	434.738
2022-08-16 12:49:46	87.749	8.121	548.654		2022-08-16 14:16:27	230.467	14.826	734.698		2022-08-21 15:35:54	0.307	0.221	435.024
2022-08-16 12:49:47	80.596	8.093	549.227		2022-08-16 14:16:28	230.447	15.412	734.555		2022-08-21 15:35:55	0.314	0.22	434.738
2022-08-16 12:49:48	78.793	7.928	549.227		2022-08-16 14:16:29	230.44	15.943	768.758		2022-08-21 15:35:56	0.281	0.221	434.881
2022-08-16 12:49:49	82.533	7.855	550.658		2022-08-16 14:16:30	230.44	16.26	768.329		2022-08-21 15:35:57	0.234	0.221	435.024
2022-08-16 12:49:50	79.02	7.71	566.114		2022-08-16 14:16:31	207.237	16.54	768.329		2022-08-21 15:35:58	0.24	0.221	434.881
2022-08-16 12:49:51	68.58	7.535	566.686		2022-08-16 14:16:32	150.666	16.531	768.758		2022-08-21 15:35:59	0.307	0.22	434.881
2022-08-16 12:49:52	52.878	7.322	551.087		2022-08-16 14:16:33	106.724	16.136	768.472		2022-08-21 15:36:00	0.321	0.22	434.738
2022-08-16 12:49:53	40.034	6.969	550.801		2022-08-16 14:16:34	82.626	15.585	733.839		2022-08-21 15:36:01	0.301	0.22	435.024
2022-08-16 12:49:54	44.295	6.755	548.654		2022-08-16 14:16:35	63.478	14.916	715.807		2022-08-21 15:36:02	0.354	0.218	435.31
2022-08-16 12:49:55	58.575	6.532	531.767		2022-08-16 14:16:36	46.079	14.263	715.807		2022-08-21 15:36:03	0.367	0.218	435.453
2022-08-16 12:49:56	86.213	6.284	531.624		2022-08-16 14:16:37	40.141	13.482	697.775		2022-08-21 15:36:04	0.367	0.221	435.453
2022-08-16 12:49:57	94.475	6.198	514.88		2022-08-16 14:16:38	82.653	12.54	696.344		2022-08-21 15:36:05	0.381	0.221	435.167
2022-08-16 12:49:58	128.251	6.204	514.594		2022-08-16 14:16:39	118.666	11.971	681.461		2022-08-21 15:36:06	0.307	0.22	435.167
2022-08-16 12:49:59	122.246	6.384	515.595		2022-08-16 14:16:40	156.87	11.689	655.415		2022-08-21 15:36:07	0.361	0.22	434.881
2022-08-16 12:50:00	104.821	6.566	517.027		2022-08-16 14:16:41	150.793	11.512	656.273		2022-08-21 15:36:08	0.521	0.22	435.453
2022-08-16 12:50:01	83.428	6.597	513.735		2022-08-16 14:16:42	158.493	11.356	621.784		2022-08-21 15:36:09	0.554	0.22	435.597
2022-08-16 12:50:02	58.969	6.611	513.449		2022-08-16 14:16:43	224.476	11.499	607.329		2022-08-21 15:36:10	0.541	0.221	434.595
2022-08-16 12:50:03	48.563	6.569	511.875		2022-08-16 14:16:44	230.453	11.753	607.759		2022-08-21 15:36:11	0.468	0.224	435.167
2022-08-16 12:50:04	46.079	6.388	512.018		2022-08-16 14:16:45	230.453	12.356	605.183		2022-08-21 15:36:12	0.381	0.223	435.167
2022-08-16 12:50:05	39.974	6.192	507.438		2022-08-16 14:16:46	230.42	12.917	605.183		2022-08-21 15:36:13	0.301	0.224	434.738
2022-08-16 12:50:06	37.456	5.996	496.132		2022-08-16 14:16:47	197.913	13.433	605.183		2022-08-21 15:36:14	0.254	0.223	435.453
2022-08-16 12:50:07	34.971	5.743	496.132		2022-08-16 14:16:48	167.624	13.648	605.326		2022-08-21 15:36:15	0.274	0.224	434.595
2022-08-16 12:50:08	30.69	5.537	494.415		2022-08-16 14:16:49	148.181	13.661	605.469		2022-08-21 15:36:16	0.254	0.223	435.167
2022-08-16 12:50:09	26.85	5.191	494.415		2022-08-16 14:16:50	124.37	13.493	621.641		2022-08-21 15:36:17	0.234	0.221	434.738
2022-08-16 12:50:10	25.207	4.983	492.841		2022-08-16 14:16:51	91.356	13.107	626.22		2022-08-21 15:36:18	0.294	0.221	434.881
2022-08-16 12:50:11	46.974	4.784	491.41		2022-08-16 14:16:52	64.353	12.709	631.515		2022-08-21 15:36:19	0.354	0.22	434.595
2022-08-16 12:50:12	68.547	4.607	491.839		2022-08-16 14:16:53	69.509	12.149	625.361		2022-08-21 15:36:20	0.414	0.217	434.881
2022-08-16 12:50:13	74.498	4.597	480.533		2022-08-16 14:16:54	110.424	11.692	624.646		2022-08-21 15:36:21	0.474	0.217	434.022
2022-08-16 12:50:14	66.77	4.604	476.24		2022-08-16 14:16:55	139.719	11.332	625.075		2022-08-21 15:36:22	0.521	0.22	435.167
2022-08-16 12:50:15	57.353	4.607	476.24		2022-08-16 14:16:56	147.273	11.151	624.646		2022-08-21 15:36:23	1.169	0.22	434.452
2022-08-16 12:50:16	47.728	4.604	459.496		2022-08-16 14:16:57	143.112	11.126	624.36		2022-08-21 15:36:24	1.182	0.22	434.165
2022-08-16 12:50:17	41.016	4.585	458.781		2022-08-16 14:16:58	142.243	10.977	624.073		2022-08-21 15:36:25	0.561	0.221	434.309
2022-08-16 12:50:18	36.608	4.411	458.924		2022-08-16 14:16:59	155.869	10.964	619.494		2022-08-21 15:36:26	0.548	0.22	434.881
2022-08-16 12:50:19	33.996	4.231	458.494		2022-08-16 14:17:00	148.235	10.964	619.494		2022-08-21 15:36:27	1.176	0.221	434.738
2022-08-16 12:50:20	40.068	4.176	458.781		2022-08-16 14:17:01	149.103	10.96	604.61		2022-08-21 15:36:28	1.236	0.226	434.595
2022-08-16 12:50:21	57.313	4.034	459.353		2022-08-16 14:17:02	162.347	10.974	587.151		2022-08-21 15:36:29	1.242	0.226	434.595
2022-08-16 12:50:22	51.081	4.025	464.076		2022-08-16 14:17:03	158.654	11.12	587.151		2022-08-21 15:36:30	1.249	0.227	435.31
2022-08-16 12:50:23	51.168	4.019	463.503		2022-08-16 14:17:04	155.929	11.136	578.421		2022-08-21 15:36:31	1.249	0.229	434.881
2022-08-16 12:50:24	50.373	4.012	475.095		2022-08-16 14:17:05	148.341	11.148	571.838		2022-08-21 15:36:32	1.142	0.23	435.74
2022-08-16 12:50:25	73.503	4.015	476.812		2022-08-16 14:17:06	130.822	11.147	587.151		2022-08-21 15:36:33	0.468	0.23	435.883
2022-08-16 12:50:26	80.616	4.038	476.526		2022-08-16 14:17:07	106.47	11.12	602.321		2022-08-21 15:36:34	0.394	0.227	436.169
2022-08-16 12:50:27	84.984	4.209	477.671		2022-08-16 14:17:08	114.565	10.931	602.464		2022-08-21 15:36:35	0.387	0.227	436.169
2022-08-16 12:50:28	89.365	4.413	481.678		2022-08-16 14:17:09	143.145	10.758	615.916		2022-08-21 15:36:36	0.494	0.229	436.026
2022-08-16 12:50:29	102.249	4.618	481.964		2022-08-16 14:17:10	161.005	10.755	624.073		2022-08-21 15:36:37	0.548	0.229	436.455
2022-08-16 12:50:30	130.328	4.888	495.274		2022-08-16 14:17:11	175.452	10.777	624.36		2022-08-21 15:36:38	0.541	0.229	435.167
2022-08-16 12:50:31	151.501	5.2	495.417		2022-08-16 14:17:12	181.91	10.957	624.217		2022-08-21 15:36:39	0.541	0.227	435.883
2022-08-16 12:50:32	163.109	5.73	511.445		2022-08-16 14:17:13	183.62	11.147	623.358		2022-08-21 15:36:40	0.541	0.227	436.169
2022-08-16 12:50:33	166.709	6.193	530.765		2022-08-16 14:17:14	169.107	11.335	623.644		2022-08-21 15:36:41	0.528	0.227	436.169
2022-08-16 12:50:34	181.917	6.749	530.765		2022-08-16 14:17:15	138.062	11.503	622.929		2022-08-21 15:36:42	0.514	0.227	436.455
2022-08-16 12:50:35	206.436	7.431	550.515		2022-08-16 14:17:16	100.526	11.426	622.785		2022-08-21 15:36:43	0.468	0.224	435.597
2022-08-16 12:50:36	206.342	8.081	570.836		2022-08-16 14:17:17	70.23	11.144	622.213		2022-08-21 15:36:44	0.401	0.226	436.312
2022-08-16 12:50:37	207.083	8.678	570.979		2022-08-16 14:17:18	55.837	10.762	588.725		2022-08-21 15:36:45	0.314	0.227	436.455
2022-08-16 12:50:38	202.856	9.219	606.614		2022-08-16 14:17:19	53.8	10.201	588.153		2022-08-21 15:36:46	0.26	0.224	435.74
2022-08-16 12:50:39	182.191	9.771	606.471		2022-08-16 14:17:20	55.503	9.78	563.824		2022-08-21 15:36:47	0.227	0.223	435.31
2022-08-16 12:50:40	161.032	10.172	622.356		2022-08-16 14:17:21	59.19	9.258	550.801		2022-08-21 15:36:48	0.214	0.224	435.883
2022-08-16 12:50:41	201.994	10.579	637.526		2022-08-16 14:17:22	70.317	8.871	551.23		2022-08-21 15:36:49	0.301	0.224	435.453
2022-08-16 12:50:42	230.44	11.064	637.383		2022-08-16 14:17:23	76.235	8.669	548.797		2022-08-21 15:36:50	0.347	0.223	435.31
2022-08-16 12:50:43	230.453	11.546	661.568		2022-08-16 14:17:24	80.456	8.445	548.225		2022-08-21 15:36:51	0.321	0.221	435.31
2022-08-16 12:50:44	227.121	12.17	697.203		2022-08-16 14:17:25	82.473	8.12	548.368		2022-08-21 15:36:52	0.327	0.221	435.453
2022-08-16 12:50:45	187.928	12.708	697.489		2022-08-16 14:17:26	82.526	8.011	548.225		2022-08-21 15:36:53	0.361	0.223	435.31
2022-08-16 12:50:46	187.06	12.931	695.772		2022-08-16 14:17:27	82.466	7.844	548.368		2022-08-21 15:36:54	0.427	0.221	435.74
2022-08-16 12:50:47	204.899	13.281	689.475		2022-08-16 14:17:28	112.842	7.719	531.767		2022-08-21 15:36:55	0.574	0.223	435.024
2022-08-16 12:50:48	197.579	13.575	681.89		2022-08-16 14:17:29	152.209	7.74	515.452		2022-08-21 15:36:56	1.229	0.223	435.453
2022-08-16 12:50:49	165.653	13.695	683.464		2022-08-16 14:17:30	164.959	8.049	516.311		2022-08-21 15:36:57	1.176	0.224	435.31
2022-08-16 12:50:50	130.395	13.704	690.334		2022-08-16 14:17:31	172.519	8.298	531.481		2022-08-21 15:36:58	0.521	0.224	435.024
2022-08-16 12:50:51	92.264	13.643	680.316		2022-08-16 14:17:32	162.401	8.663	539.638		2022-08-21 15:36:59	0.514	0.226	434.738
2022-08-16 12:50:52	63.678	13.109	658.706		2022-08-16 14:17:33	140.794	8.855	541.069		2022-08-21 15:37:00	1.182	0.223	434.452
2022-08-16 12:50:53	44.389	12.564	658.563		2022-08-16 14:17:34	124.023	9.023	550.801		2022-08-21 15:37:01	0.554	0.224	434.452
2022-08-16 12:50:54	33.068	11.974	624.217		2022-08-16 14:17:35	113.737	9.051	550.371		2022-08-21 15:37:02	0.501	0.227	435.024
2022-08-16 12:50:55	25.3	11.325	624.073		2022-08-16 14:17:36	92.685	9.05	566.114		2022-08-21 15:37:03	0.381	0.226	434.738
2022-08-16 12:50:56	20.164	10.587	605.469		2022-08-16 14:17:37	88.617	9.009	566.829		2022-08-21 15:37:04	0.447	0.227	435.31
2022-08-16 12:50:57	19.977	9.809	569.405		2022-08-16 14:17:38	78.926	8.858	566.829		2022-08-21 15:37:05	1.169	0.224	434.881
2022-08-16 12:50:58	40.755	9.21	569.834		2022-08-16 14:17:39	66.87	8.699	567.402		2022-08-21 15:37:06	1.242	0.227	434.881
2022-08-16 12:50:59	84.517	8.813	535.345		2022-08-16 14:17:40	60.886	8.479	567.258		2022-08-21 15:37:07	1.202	0.224	435.167
2022-08-16 12:51:00	131.61	8.476	510.873		2022-08-16 14:17:41	49.438	8.239	552.947		2022-08-21 15:37:08	0.514	0.224	435.024
2022-08-16 12:51:01	164.999	8.464	511.016		2022-08-16 14:17:42	49.231	7.894	549.942		2022-08-21 15:37:09	0.394	0.224	435.167
2022-08-16 12:51:02	178.01	8.632	514.737		2022-08-16 14:17:43	67.705	7.545	550.085		2022-08-21 15:37:10	0.321	0.224	435.31
2022-08-16 12:51:03	182.785	8.852	532.769		2022-08-16 14:17:44	66.757	7.31	550.085		2022-08-21 15:37:11	0.267	0.227	435.453
2022-08-16 12:51:04	152.529	9.063	532.626		2022-08-16 14:17:45	52.07	6.975	550.085		2022-08-21 15:37:12	0.247	0.226	434.595
2022-08-16 12:51:05	118.386	9.307	529.763		2022-08-16 14:17:46	79.668	6.777	550.228		2022-08-21 15:37:13	0.234	0.227	435.453
2022-08-16 12:51:06	94.602	9.416	514.021		2022-08-16 14:17:47	143.967	6.768	535.774		2022-08-21 15:37:14	0.394	0.226	435.024
2022-08-16 12:51:07	70.237	9.376	513.592		2022-08-16 14:17:48	215.947	7.11	529.907		2022-08-21 15:37:15	0.581	0.224	435.024
2022-08-16 12:51:08	90.287	9.22	517.885		2022-08-16 14:17:49	228.684	7.792	529.62		2022-08-21 15:37:16	0.574	0.224	435.024
2022-08-16 12:51:09	130.829	9.051	516.311		2022-08-16 14:17:50	178.551	8.45	547.08		2022-08-21 15:37:17	0.514	0.226	435.31
2022-08-16 12:51:10	125.679	9.051	530.908		2022-08-16 14:17:51	126.314	8.842	551.946		2022-08-21 15:37:18	0.394	0.227	434.738
2022-08-16 12:51:11	107.279	9.053	530.479		2022-08-16 14:17:52	148.194	8.894	551.946		2022-08-21 15:37:19	0.314	0.227	435.74
2022-08-16 12:51:12	92.819	9.036	549.227		2022-08-16 14:17:53	175.104	9.228	567.258		2022-08-21 15:37:20	0.267	0.227	435.74
2022-08-16 12:51:13	66.87	8.876	567.402		2022-08-16 14:17:54	190.119	9.598	567.258		2022-08-21 15:37:21	0.234	0.226	434.738
2022-08-16 12:51:14	46.065	8.83	567.688		2022-08-16 14:17:55	183.046	9.982	570.264		2022-08-21 15:37:22	0.227	0.224	434.452
2022-08-16 12:51:15	33.175	8.475	556.811		2022-08-16 14:17:56	156.269	10.345	602.893		2022-08-21 15:37:23	0.214	0.224	434.738
2022-08-16 12:51:16	31.552	8.09	550.801		2022-08-16 14:17:57	141.262	10.57	603.752		2022-08-21 15:37:24	0.214	0.223	435.31
2022-08-16 12:51:17	58.068	7.713	550.801		2022-08-16 14:17:58	135.504	10.732	620.925		2022-08-21 15:37:25	0.227	0.223	435.453
2022-08-16 12:51:18	80.609	7.359	530.908		2022-08-16 14:17:59	151.734	10.755	620.782		2022-08-21 15:37:26	0.214	0.223	434.738
2022-08-16 12:51:19	127.576	7.148	511.588		2022-08-16 14:18:00	194.574	10.915	623.072		2022-08-21 15:37:27	0.207	0.223	435.167
2022-08-16 12:51:20	176.006	7.334	511.588		2022-08-16 14:18:01	223.694	11.157	624.503		2022-08-21 15:37:28	0.194	0.223	435.31
2022-08-16 12:51:21	198.481	7.714	529.334		2022-08-16 14:18:02	230.427	11.656	624.36		2022-08-21 15:37:29	0.194	0.22	434.738
2022-08-16 12:51:22	200.251	8.124	549.083		2022-08-16 14:18:03	230.44	12.157	657.561		2022-08-21 15:37:30	0.187	0.217	434.738
2022-08-16 12:51:23	196.143	8.677	549.227		2022-08-16 14:18:04	230.44	12.73	679.457		2022-08-21 15:37:31	0.18	0.218	434.309
2022-08-16 12:51:24	149.163	9.041	555.81		2022-08-16 14:18:05	218.939	13.369	679.314		2022-08-21 15:37:32	0.187	0.218	434.165
2022-08-16 12:51:25	113.016	9.272	556.668		2022-08-16 14:18:06	158.086	13.685	660.853		2022-08-21 15:37:33	0.187	0.218	434.165
2022-08-16 12:51:26	102.997	9.424	568.833		2022-08-16 14:18:07	113.343	13.684	642.821		2022-08-21 15:37:34	0.174	0.22	434.309
2022-08-16 12:51:27	78.813	9.415	554.522		2022-08-16 14:18:08	98.115	13.483	642.249		2022-08-21 15:37:35	0.18	0.218	434.309
2022-08-16 12:51:28	56.705	9.238	563.108		2022-08-16 14:18:09	107.379	13.02	637.812		2022-08-21 15:37:36	0.174	0.218	434.309
2022-08-16 12:51:29	58.248	9.02	549.942		2022-08-16 14:18:10	98.816	12.714	639.1		2022-08-21 15:37:37	0.174	0.217	434.309
2022-08-16 12:51:30	106.577	8.845	567.258		2022-08-16 14:18:11	81.765	12.332	623.501		2022-08-21 15:37:38	0.18	0.217	434.738
2022-08-16 12:51:31	175.071	8.827	567.115		2022-08-16 14:18:12	91.91	11.915	620.639		2022-08-21 15:37:39	0.207	0.215	434.738
2022-08-16 12:51:32	210.496	8.87	586.578		2022-08-16 14:18:13	99.023	11.517	621.068		2022-08-21 15:37:40	0.22	0.215	434.165
2022-08-16 12:51:33	217.85	9.252	587.294		2022-08-16 14:18:14	84.176	11.144	605.326		2022-08-21 15:37:41	0.207	0.217	434.165
2022-08-16 12:51:34	223.761	9.798	623.358		2022-08-16 14:18:15	77.998	10.764	598.457		2022-08-21 15:37:42	0.194	0.215	434.022
2022-08-16 12:51:35	217.743	10.377	657.704		2022-08-16 14:18:16	119.682	10.444	599.029		2022-08-21 15:37:43	0.187	0.217	434.309
2022-08-16 12:51:36	197.74	10.945	657.704		2022-08-16 14:18:17	144.822	10.199	583.859		2022-08-21 15:37:44	0.18	0.215	434.309
2022-08-16 12:51:37	160.998	11.326	642.535		2022-08-16 14:18:18	171.611	10.204	566.4		2022-08-21 15:37:45	0.18	0.214	434.165
2022-08-16 12:51:38	124.243	11.52	625.791		2022-08-16 14:18:19	209.715	10.557	565.112		2022-08-21 15:37:46	0.274	0.217	434.309
2022-08-16 12:51:39	109.703	11.522	626.22		2022-08-16 14:18:20	216.154	10.933	548.797		2022-08-21 15:37:47	0.541	0.217	434.165
2022-08-16 12:51:40	113.597	11.497	623.358		2022-08-16 14:18:21	207.297	11.325	549.227		2022-08-21 15:37:48	1.249	0.218	434.165
2022-08-16 12:51:41	119.568	11.323	623.215		2022-08-16 14:18:22	183.734	11.699	568.69		2022-08-21 15:37:49	1.276	0.223	434.452
2022-08-16 12:51:42	138.944	11.153	617.061		2022-08-16 14:18:23	184.595	11.95	605.755		2022-08-21 15:37:50	1.209	0.224	434.881
2022-08-16 12:51:43	133.434	11.136	623.215		2022-08-16 14:18:24	230.42	12.179	605.898		2022-08-21 15:37:51	0.501	0.226	435.883
2022-08-16 12:51:44	111.313	11.107	623.358		2022-08-16 14:18:25	230.433	12.729	629.082		2022-08-21 15:37:52	1.149	0.226	435.31
2022-08-16 12:51:45	85.959	10.925	626.649		2022-08-16 14:18:26	230.44	13.427	635.236		2022-08-21 15:37:53	0.494	0.226	435.31
2022-08-16 12:51:46	65.922	10.579	622.499		2022-08-16 14:18:27	228.062	13.886	660.567		2022-08-21 15:37:54	0.347	0.226	434.738
2022-08-16 12:51:47	51.903	10.161	622.785		2022-08-16 14:18:28	171.638	14.239	662.713		2022-08-21 15:37:55	0.281	0.226	434.452
2022-08-16 12:51:48	43.026	9.664	606.471		2022-08-16 14:18:29	119.06	14.246	662.713		2022-08-21 15:37:56	0.234	0.224	435.453
2022-08-16 12:51:49	36.695	9.229	556.668		2022-08-16 14:18:30	87.455	14.03	676.881		2022-08-21 15:37:57	0.207	0.221	435.167
2022-08-16 12:51:50	33.155	8.845	557.527		2022-08-16 14:18:31	115.394	13.646	676.881		2022-08-21 15:37:58	0.194	0.224	435.453
2022-08-16 12:51:51	31.452	8.396	529.334		2022-08-16 14:18:32	165.867	13.285	676.309		2022-08-21 15:37:59	0.207	0.22	435.883
2022-08-16 12:51:52	28.58	7.903	529.191		2022-08-16 14:18:33	199.276	13.125	676.023		2022-08-21 15:38:00	0.341	0.221	435.167
2022-08-16 12:51:53	26.863	7.435	511.016		2022-08-16 14:18:34	190.125	13.302	663.286		2022-08-21 15:38:01	0.574	0.221	435.883
2022-08-16 12:51:54	35.633	6.935	478.816		2022-08-16 14:18:35	144.04	13.333	663.715		2022-08-21 15:38:02	0.588	0.223	435.883
2022-08-16 12:51:55	35.84	6.556	478.673		2022-08-16 14:18:36	103.111	13.11	661.998		2022-08-21 15:38:03	0.427	0.224	436.026
2022-08-16 12:51:56	36.594	6.19	476.812		2022-08-16 14:18:37	129.921	12.893	653.411		2022-08-21 15:38:04	0.314	0.224	435.31
2022-08-16 12:51:57	46.192	5.828	475.954		2022-08-16 14:18:38	178.591	12.717	652.839		2022-08-21 15:38:05	0.247	0.224	436.026
2022-08-16 12:51:58	49.492	5.711	475.811		2022-08-16 14:18:39	207.117	12.733	632.231		2022-08-21 15:38:06	0.22	0.224	435.597
2022-08-16 12:51:59	54.882	5.528	459.353		2022-08-16 14:18:40	214.444	12.922	633.662		2022-08-21 15:38:07	0.207	0.223	435.31
2022-08-16 12:52:00	93.627	5.366	459.353		2022-08-16 14:18:41	209.762	13.162	626.936		2022-08-21 15:38:08	0.194	0.221	435.453
2022-08-16 12:52:01	118.767	5.387	450.623		2022-08-16 14:18:42	212.534	13.519	626.363		2022-08-21 15:38:09	0.187	0.22	434.738
2022-08-16 12:52:02	109.363	5.567	460.355		2022-08-16 14:18:43	230.413	13.856	624.646		2022-08-21 15:38:10	0.18	0.215	434.881
2022-08-16 12:52:03	86.126	5.752	460.498		2022-08-16 14:18:44	208.62	14.08	637.096		2022-08-21 15:38:11	0.207	0.215	435.167
2022-08-16 12:52:04	102.777	5.833	476.956		2022-08-16 14:18:45	164.919	14.264	637.812		2022-08-21 15:38:12	0.227	0.217	434.165
2022-08-16 12:52:05	181.222	6.174	496.276		2022-08-16 14:18:46	124.738	14.249	641.676		2022-08-21 15:38:13	0.24	0.217	435.31
2022-08-16 12:52:06	230.46	6.597	496.419		2022-08-16 14:18:47	118.994	14.047	641.39		2022-08-21 15:38:14	0.227	0.217	435.31
2022-08-16 12:52:07	234	7.682	517.313		2022-08-16 14:18:48	125.072	13.691	641.247		2022-08-21 15:38:15	0.214	0.217	435.167
2022-08-16 12:52:08	238.455	8.828	567.974		2022-08-16 14:18:49	153.264	13.485	642.105		2022-08-21 15:38:16	0.194	0.217	433.736
2022-08-16 12:52:09	237.967	9.99	568.403		2022-08-16 14:18:50	205.307	13.329	642.964		2022-08-21 15:38:17	0.194	0.217	434.452
2022-08-16 12:52:10	234.134	11.341	625.218		2022-08-16 14:18:51	230.427	13.507	642.678		2022-08-21 15:38:18	0.18	0.214	434.309
2022-08-16 12:52:11	230.473	12.535	625.791		2022-08-16 14:18:52	219.44	13.842	649.404		2022-08-21 15:38:19	0.18	0.215	433.879
2022-08-16 12:52:12	230.453	13.67	660.424		2022-08-16 14:18:53	189.905	14.047	658.706		2022-08-21 15:38:20	0.254	0.215	433.736
2022-08-16 12:52:13	229.084	14.428	694.913		2022-08-16 14:18:54	163.937	14.07	658.563		2022-08-21 15:38:21	0.447	0.215	434.165
2022-08-16 12:52:14	174.971	14.815	693.911		2022-08-16 14:18:55	151.327	14.061	660.137		2022-08-21 15:38:22	0.401	0.214	434.595
2022-08-16 12:52:15	130.141	14.848	697.489		2022-08-16 14:18:56	138.65	13.893	659.851		2022-08-21 15:38:23	0.307	0.215	434.595
2022-08-16 12:52:16	119.568	14.82	697.203		2022-08-16 14:18:57	152.803	13.706	641.104		2022-08-21 15:38:24	0.254	0.215	434.595
2022-08-16 12:52:17	102.977	14.625	710.083		2022-08-16 14:18:58	172.586	13.67	622.929		2022-08-21 15:38:25	0.214	0.215	434.165
2022-08-16 12:52:18	127.964	14.251	698.348		2022-08-16 14:18:59	172.499	13.64	622.642		2022-08-21 15:38:26	0.2	0.214	434.022
2022-08-16 12:52:19	184.729	14.024	698.348		2022-08-16 14:19:00	167.45	13.522	623.358		2022-08-21 15:38:27	0.267	0.214	434.022
2022-08-16 12:52:20	230.453	13.897	697.632		2022-08-16 14:19:01	159.889	13.498	622.785		2022-08-21 15:38:28	0.294	0.212	433.879
2022-08-16 12:52:21	230.467	14.203	728.974		2022-08-16 14:19:02	136.386	13.452	623.93		2022-08-21 15:38:29	0.24	0.212	434.452
2022-08-16 12:52:22	230.467	14.627	730.405		2022-08-16 14:19:03	99.711	13.095	623.787		2022-08-21 15:38:30	0.227	0.212	434.165
2022-08-16 12:52:23	230.467	15.014	736.272		2022-08-16 14:19:04	69.549	12.715	623.644		2022-08-21 15:38:31	0.207	0.211	434.595
2022-08-16 12:52:24	230.447	15.576	728.544		2022-08-16 14:19:05	49.458	12.158	623.358		2022-08-21 15:38:32	0.274	0.212	435.31
2022-08-16 12:52:25	174.463	15.937	729.546		2022-08-16 14:19:06	51.188	11.531	588.582		2022-08-21 15:38:33	0.441	0.212	434.738
2022-08-16 12:52:26	116.188	15.935	696.917		2022-08-16 14:19:07	84.396	11.065	588.296		2022-08-21 15:38:34	0.514	0.212	434.452
2022-08-16 12:52:27	77.904	15.576	697.06		2022-08-16 14:19:08	121.271	10.706	551.23		2022-08-21 15:38:35	0.401	0.212	435.167
2022-08-16 12:52:28	53.793	15.013	659.994		2022-08-16 14:19:09	145.837	10.486	566.686		2022-08-21 15:38:36	0.341	0.215	435.167
2022-08-16 12:52:29	39.286	14.438	623.787		2022-08-16 14:19:10	192.61	10.529	566.686		2022-08-21 15:38:37	0.521	0.217	434.738
2022-08-16 12:52:30	29.795	13.672	623.787		2022-08-16 14:19:11	230.413	10.762	568.69		2022-08-21 15:38:38	0.561	0.22	434.165
2022-08-16 12:52:31	24.151	12.712	606.471		2022-08-16 14:19:12	227.034	11.166	567.974		2022-08-21 15:38:39	0.474	0.218	434.165
2022-08-16 12:52:32	19.256	11.79	604.467		2022-08-16 14:19:13	219.286	11.701	603.465		2022-08-21 15:38:40	0.381	0.218	435.31
2022-08-16 12:52:33	21.787	10.976	587.437		2022-08-16 14:19:14	187.107	12.118	623.072		2022-08-21 15:38:41	0.481	0.221	435.024
2022-08-16 12:52:34	104.4	10.189	585.863		2022-08-16 14:19:15	202.301	12.348	622.929		2022-08-21 15:38:42	1.162	0.221	435.024
2022-08-16 12:52:35	177.776	9.819	585.434		2022-08-16 14:19:16	230.48	12.715	624.073		2022-08-21 15:38:43	1.202	0.223	435.167
2022-08-16 12:52:36	190.386	9.816	583.573		2022-08-16 14:19:17	230.407	13.106	625.075		2022-08-21 15:38:44	0.548	0.223	434.595
2022-08-16 12:52:37	174.784	9.993	566.114		2022-08-16 14:19:18	207.424	13.667	624.503		2022-08-21 15:38:45	0.521	0.223	435.31
2022-08-16 12:52:38	161.145	10.177	565.255		2022-08-16 14:19:19	181.176	13.874	641.247		2022-08-21 15:38:46	1.202	0.224	435.167
2022-08-16 12:52:39	157.398	10.38	548.225		2022-08-16 14:19:20	169.18	14.033	658.134		2022-08-21 15:38:47	1.222	0.224	435.597
2022-08-16 12:52:40	175.926	10.576	546.794		2022-08-16 14:19:21	162.301	14.037	658.706		2022-08-21 15:38:48	1.202	0.224	435.453
2022-08-16 12:52:41	209.688	10.781	544.647		2022-08-16 14:19:22	175.385	14.021	676.881		2022-08-21 15:38:49	1.216	0.224	435.31
2022-08-16 12:52:42	220.448	11.15	534.915		2022-08-16 14:19:23	186.385	14.036	675.736		2022-08-21 15:38:50	0.568	0.224	435.453
2022-08-16 12:52:43	185.57	11.528	565.112		2022-08-16 14:19:24	150.078	14.036	696.631		2022-08-21 15:38:51	0.494	0.224	435.167
2022-08-16 12:52:44	157.799	11.76	566.257		2022-08-16 14:19:25	107.392	13.857	675.88		2022-08-21 15:38:52	0.508	0.226	435.167
2022-08-16 12:52:45	156.663	11.955	601.605		2022-08-16 14:19:26	74.258	13.482	676.595		2022-08-21 15:38:53	0.554	0.224	434.738
2022-08-16 12:52:46	230.453	12.146	601.605		2022-08-16 14:19:27	52.751	12.831	655.844		2022-08-21 15:38:54	0.481	0.224	434.595
2022-08-16 12:52:47	230.46	12.54	637.096		2022-08-16 14:19:28	65.207	12.175	623.072		2022-08-21 15:38:55	0.361	0.223	434.452
2022-08-16 12:52:48	230.46	13.119	676.166		2022-08-16 14:19:29	74.625	11.696	622.929		2022-08-21 15:38:56	0.347	0.224	434.738
2022-08-16 12:52:49	230.46	13.888	674.735		2022-08-16 14:19:30	76.261	11.15	586.722		2022-08-21 15:38:57	0.307	0.221	434.452
2022-08-16 12:52:50	218.171	14.454	681.461		2022-08-16 14:19:31	94.535	10.755	586.292		2022-08-21 15:38:58	0.307	0.221	434.452
2022-08-16 12:52:51	148.014	14.8	697.775		2022-08-16 14:19:32	160.297	10.541	568.403		2022-08-21 15:38:59	0.341	0.223	434.738
2022-08-16 12:52:52	97.574	14.789	697.775		2022-08-16 14:19:33	230.4	10.582	553.949		2022-08-21 15:39:00	0.327	0.223	434.165
2022-08-16 12:52:53	89.392	14.44	662.57		2022-08-16 14:19:34	230.44	11.11	554.378		2022-08-21 15:39:01	0.301	0.22	435.024
2022-08-16 12:52:54	111.032	14.05	662.141		2022-08-16 14:19:35	230.427	11.726	590.299		2022-08-21 15:39:02	0.287	0.218	435.31
2022-08-16 12:52:55	121.478	13.666	640.388		2022-08-16 14:19:36	224.643	12.423	623.93		2022-08-21 15:39:03	0.474	0.22	435.31
2022-08-16 12:52:56	125.679	13.128	628.653		2022-08-16 14:19:37	162.16	12.887	623.787		2022-08-21 15:39:04	0.588	0.22	435.74
2022-08-16 12:52:57	120.463	12.895	629.798		2022-08-16 14:19:38	140.848	12.922	605.183		2022-08-21 15:39:05	0.481	0.22	435.167
2022-08-16 12:52:58	115.307	12.535	625.505		2022-08-16 14:19:39	170.77	12.926	569.834		2022-08-21 15:39:06	0.341	0.221	435.167
2022-08-16 12:52:59	116.402	12.179	623.215		2022-08-16 14:19:40	184.495	13.081	569.691		2022-08-21 15:39:07	0.287	0.22	435.167
2022-08-16 12:53:00	116.329	11.958	623.358		2022-08-16 14:19:41	178.27	13.119	607.043		2022-08-21 15:39:08	0.254	0.22	435.167
2022-08-16 12:53:01	112.068	11.696	621.068		2022-08-16 14:19:42	161.018	13.266	606.614		2022-08-21 15:39:09	0.307	0.218	435.167
2022-08-16 12:53:02	109.944	11.475	620.496		2022-08-16 14:19:43	202.856	13.303	627.651		2022-08-21 15:39:10	0.294	0.217	435.024
2022-08-16 12:53:03	106.41	11.141	588.725		2022-08-16 14:19:45	210.289	13.874	658.277		2022-08-21 15:39:11	0.307	0.218	435.024
2022-08-16 12:53:04	94.448	10.931	555.237		2022-08-16 14:19:46	183.767	14.058	678.885		2022-08-21 15:39:12	0.401	0.217	436.598
2022-08-16 12:53:05	80.536	10.578	563.538		2022-08-16 14:19:47	182.819	14.085	679.171		2022-08-21 15:39:13	0.481	0.217	435.883
2022-08-16 12:53:06	68.594	10.172	547.938		2022-08-16 14:19:48	173.448	14.232	679.314		2022-08-21 15:39:14	0.541	0.217	435.74
2022-08-16 12:53:07	64.506	9.795	515.595		2022-08-16 14:19:49	139.866	14.187	679.887		2022-08-21 15:39:15	1.149	0.217	435.74
2022-08-16 12:53:08	67.953	9.413	516.454		2022-08-16 14:19:50	121.311	14.021	679.887		2022-08-21 15:39:16	1.155	0.218	435.597
2022-08-16 12:53:09	72.26	9.045	530.765		2022-08-16 14:19:51	147.613	13.692	642.105		2022-08-21 15:39:17	0.474	0.221	435.74
2022-08-16 12:53:10	71.245	8.845	534.2		2022-08-16 14:19:52	159.422	13.566	605.04		2022-08-21 15:39:18	0.381	0.221	435.167
2022-08-16 12:53:11	70.384	8.506	534.057		2022-08-16 14:19:53	143.886	13.473	604.753		2022-08-21 15:39:19	0.427	0.22	436.026
2022-08-16 12:53:12	65.882	8.286	529.907		2022-08-16 14:19:54	132.205	13.124	622.07		2022-08-21 15:39:20	0.468	0.22	435.024
2022-08-16 12:53:13	62.603	8.051	529.62		2022-08-16 14:19:55	127.483	12.925	637.526		2022-08-21 15:39:21	0.414	0.221	435.597
2022-08-16 12:53:14	67.779	7.723	516.025		2022-08-16 14:19:56	120.583	12.723	638.385		2022-08-21 15:39:22	0.394	0.22	435.167
2022-08-16 12:53:15	109.383	7.536	517.027		2022-08-16 14:19:57	102.964	12.51	618.349		2022-08-21 15:39:23	0.441	0.22	435.883
2022-08-16 12:53:16	150.833	7.529	516.74		2022-08-16 14:19:58	78.592	12.14	616.202		2022-08-21 15:39:24	0.468	0.221	435.74
2022-08-16 12:53:17	158.34	7.711	520.175		2022-08-16 14:19:59	77.103	11.701	588.868		2022-08-21 15:39:25	0.374	0.22	435.453
2022-08-16 12:53:18	148.983	7.924	521.606		2022-08-16 14:20:00	128.939	11.326	568.69		2022-08-21 15:39:26	0.294	0.22	435.31
2022-08-16 12:53:19	127.73	8.13	531.767		2022-08-16 14:20:01	185.517	11.165	568.69		2022-08-21 15:39:27	0.254	0.217	435.597
2022-08-16 12:53:20	112.816	8.305	533.484		2022-08-16 14:20:02	208.059	11.347	552.518		2022-08-21 15:39:28	0.267	0.22	435.74
2022-08-16 12:53:21	145.703	8.47	533.627		2022-08-16 14:20:03	169.307	11.662	552.804		2022-08-21 15:39:29	0.247	0.22	435.883
2022-08-16 12:53:22	205.167	8.683	551.373		2022-08-16 14:20:04	120.029	11.707	551.802		2022-08-21 15:39:30	0.22	0.215	435.31
2022-08-16 12:53:23	203.036	9.027	568.69		2022-08-16 14:20:05	81.785	11.533	553.09		2022-08-21 15:39:31	0.207	0.214	435.31
2022-08-16 12:53:24	230.447	9.445	569.262		2022-08-16 14:20:06	56.057	11.304	550.371		2022-08-21 15:39:32	0.207	0.215	435.597
2022-08-16 12:53:25	230.447	10.162	606.471		2022-08-16 14:20:07	40.983	10.765	548.654		2022-08-21 15:39:33	0.2	0.214	435.453
2022-08-16 12:53:26	230.467	10.977	637.24		2022-08-16 14:20:08	34.811	10.177	532.626		2022-08-21 15:39:34	0.194	0.214	435.597
2022-08-16 12:53:27	230.447	11.744	638.241		2022-08-16 14:20:09	30.563	9.61	532.626		2022-08-21 15:39:35	0.187	0.214	435.597
2022-08-16 12:53:28	186.165	12.356	644.681		2022-08-16 14:20:10	53.82	9.05	514.594		2022-08-21 15:39:36	0.187	0.211	435.024
2022-08-16 12:53:29	125.319	12.712	661.568		2022-08-16 14:20:11	92.859	8.836	498.279		2022-08-21 15:39:37	0.18	0.211	435.024
2022-08-16 12:53:30	83.615	12.708	660.996		2022-08-16 14:20:12	112.041	8.65	499.138		2022-08-21 15:39:38	0.174	0.212	435.167
2022-08-16 12:53:31	57.219	12.366	642.105		2022-08-16 14:20:13	113.884	8.509	514.451		2022-08-21 15:39:39	0.174	0.209	434.881
2022-08-16 12:53:32	40.862	11.956	642.249		2022-08-16 14:20:14	93.653	8.488	531.91		2022-08-21 15:39:40	0.18	0.212	435.167
2022-08-16 12:53:33	30.363	11.337	623.644		2022-08-16 14:20:15	80.509	8.463	531.624		2022-08-21 15:39:41	0.194	0.211	434.595
2022-08-16 12:53:34	40.054	10.747	604.467		2022-08-16 14:20:16	79.621	8.297	520.891		2022-08-21 15:39:42	0.354	0.209	435.31
2022-08-16 12:53:35	69.429	10.008	604.61		2022-08-16 14:20:17	86.647	8.19	521.463		2022-08-21 15:39:43	0.401	0.211	435.31
2022-08-16 12:53:36	112.916	9.604	569.262		2022-08-16 14:20:18	140.32	8.115	513.449		2022-08-21 15:39:44	0.474	0.211	435.024
2022-08-16 12:53:37	169.18	9.41	569.691		2022-08-16 14:20:19	175.211	8.426	530.622		2022-08-21 15:39:45	0.447	0.211	435.024
2022-08-16 12:53:38	176.447	9.427	585.147		2022-08-16 14:20:20	160.117	8.704	530.908		2022-08-21 15:39:46	0.387	0.212	435.167
2022-08-16 12:53:39	162.842	9.608	594.306		2022-08-16 14:20:21	164.959	8.904	548.225		2022-08-21 15:39:47	0.314	0.214	435.597
2022-08-16 12:53:40	142.945	9.788	596.882		2022-08-16 14:20:22	174.229	9.255	566.114		2022-08-21 15:39:48	0.267	0.215	434.595
2022-08-16 12:53:41	120.904	9.825	566.114		2022-08-16 14:20:23	179.185	9.636	565.684		2022-08-21 15:39:49	0.314	0.215	434.738
2022-08-16 12:53:42	111.881	9.832	546.794		2022-08-16 14:20:24	152.589	10.006	586.722		2022-08-21 15:39:50	0.427	0.215	434.881
2022-08-16 12:53:43	98.001	9.8	546.794		2022-08-16 14:20:25	119.835	10.207	605.183		2022-08-21 15:39:51	0.347	0.215	434.595
2022-08-16 12:53:44	90.26	9.63	531.481		2022-08-16 14:20:26	105.482	10.343	604.753		2022-08-21 15:39:52	0.274	0.215	434.452
2022-08-16 12:53:45	78.839	9.443	520.175		2022-08-16 14:20:27	104.747	10.205	616.345		2022-08-21 15:39:53	0.234	0.214	434.595
2022-08-16 12:53:46	61.781	9.231	526.758		2022-08-16 14:20:28	98.91	10.165	616.775		2022-08-21 15:39:54	0.281	0.217	434.595
2022-08-16 12:53:47	44.382	8.879	529.907		2022-08-16 14:20:29	120.496	10.006	603.179		2022-08-21 15:39:55	0.427	0.215	434.881
2022-08-16 12:53:48	32.373	8.659	529.907		2022-08-16 14:20:30	204.719	10.165	570.264		2022-08-21 15:39:56	0.401	0.215	434.738
2022-08-16 12:53:49	24.385	8.215	530.765		2022-08-16 14:20:31	195.876	10.579	570.264		2022-08-21 15:39:57	0.447	0.215	434.595
2022-08-16 12:53:50	22.602	7.72	530.622		2022-08-16 14:20:32	180.434	10.949	605.755		2022-08-21 15:39:58	0.568	0.217	434.738
2022-08-16 12:53:51	34.417	7.141	530.908		2022-08-16 14:20:33	177.128	11.304	605.755		2022-08-21 15:39:59	0.581	0.215	435.167
2022-08-16 12:53:52	131.19	6.782	530.193		2022-08-16 14:20:34	166.575	11.517	624.503		2022-08-21 15:40:00	1.196	0.215	435.167
2022-08-16 12:53:53	230.453	6.945	546.507		2022-08-16 14:20:35	156.57	11.707	621.641		2022-08-21 15:40:01	1.222	0.22	435.453
2022-08-16 12:53:54	230.453	7.653	546.794		2022-08-16 14:20:36	137.768	11.765	621.927		2022-08-21 15:40:02	1.162	0.22	435.167
2022-08-16 12:53:55	230.433	8.444	551.23		2022-08-16 14:20:37	116.583	11.76	606.9		2022-08-21 15:40:03	0.574	0.221	435.31
2022-08-16 12:53:56	204.519	9.03	551.087		2022-08-16 14:20:38	98.182	11.701	604.61		2022-08-21 15:40:04	1.189	0.223	434.881
2022-08-16 12:53:57	204.766	9.61	557.384		2022-08-16 14:20:39	91.803	11.506	604.897		2022-08-21 15:40:05	1.249	0.223	435.597
2022-08-16 12:53:58	228.637	10.183	567.258		2022-08-16 14:20:40	113.797	11.298	590.872		2022-08-21 15:40:06	1.189	0.221	435.31
2022-08-16 12:53:59	230.433	10.927	567.831		2022-08-16 14:20:41	129.827	11.129	605.183		2022-08-21 15:40:07	0.481	0.223	435.453
2022-08-16 12:54:00	227.902	11.514	603.895		2022-08-16 14:20:42	142.377	11.105	605.326		2022-08-21 15:40:08	0.341	0.224	435.167
2022-08-16 12:54:01	212.2	11.984	623.644		2022-08-16 14:20:43	156.643	11.12	608.045		2022-08-21 15:40:09	0.267	0.223	435.74
2022-08-16 12:54:02	206.396	12.515	623.787		2022-08-16 14:20:44	150.031	11.142	621.211		2022-08-21 15:40:10	0.227	0.226	435.167
2022-08-16 12:54:03	178.911	12.757	641.962		2022-08-16 14:20:45	119.889	11.159	621.354		2022-08-21 15:40:11	0.22	0.221	435.167
2022-08-16 12:54:04	146.264	12.935	660.71		2022-08-16 14:20:46	85.478	11.13	624.217		2022-08-21 15:40:12	0.22	0.221	435.31
2022-08-16 12:54:05	125.693	12.933	660.71		2022-08-16 14:20:47	70.223	10.912	624.217		2022-08-21 15:40:13	0.227	0.22	435.453
2022-08-16 12:54:06	118.74	12.892	677.167		2022-08-16 14:20:48	125.733	10.585	606.614		2022-08-21 15:40:14	0.26	0.218	434.881
2022-08-16 12:54:07	109.322	12.58	677.167		2022-08-16 14:20:49	161.606	10.576	606.185		2022-08-21 15:40:15	0.534	0.217	435.31
2022-08-16 12:54:08	97.988	12.344	691.049		2022-08-16 14:20:50	151.16	10.743	587.437		2022-08-21 15:40:16	1.256	0.217	435.31
2022-08-16 12:54:09	90.928	11.984	657.275		2022-08-16 14:20:51	146.478	10.774	586.435		2022-08-21 15:40:17	1.309	0.22	435.453
2022-08-16 12:54:10	81.825	11.692	656.56		2022-08-16 14:20:52	157.505	10.943	586.435		2022-08-21 15:40:18	1.302	0.22	434.881
2022-08-16 12:54:11	108.361	11.313	622.785		2022-08-16 14:20:53	181.556	11.13	584.146		2022-08-21 15:40:19	1.202	0.221	434.881
2022-08-16 12:54:12	118.954	10.963	618.921		2022-08-16 14:20:54	223.881	11.482	620.066		2022-08-21 15:40:20	0.481	0.223	435.167
2022-08-16 12:54:13	127.59	10.767	618.206		2022-08-16 14:20:55	202.268	11.793	620.209		2022-08-21 15:40:21	0.354	0.221	435.167
2022-08-16 12:54:14	103.298	10.587	608.331		2022-08-16 14:20:56	157.245	12.161	642.964		2022-08-21 15:40:22	0.381	0.221	435.167
2022-08-16 12:54:15	74.538	10.355	608.045		2022-08-16 14:20:57	118.94	12.32	624.217		2022-08-21 15:40:23	0.541	0.22	435.31
2022-08-16 12:54:16	52.758	9.982	568.69		2022-08-16 14:20:58	99.738	12.16	623.93		2022-08-21 15:40:24	0.501	0.221	434.881
2022-08-16 12:54:17	37.563	9.589	547.223		2022-08-16 14:20:59	139.806	11.987	605.469		2022-08-21 15:40:25	0.381	0.22	434.595
2022-08-16 12:54:18	49.305	9.051	546.794		2022-08-16 14:21:00	124.19	11.962	602.893		2022-08-21 15:40:26	0.327	0.221	435.167
2022-08-16 12:54:19	61.908	8.815	529.334		2022-08-16 14:21:01	115.454	11.76	602.464		2022-08-21 15:40:27	0.334	0.221	435.31
2022-08-16 12:54:20	145.363	8.476	512.59		2022-08-16 14:21:02	209.728	11.745	586.722		2022-08-21 15:40:28	0.327	0.22	435.453
2022-08-16 12:54:21	230.44	8.513	512.59		2022-08-16 14:21:03	230.453	12.157	586.722		2022-08-21 15:40:29	0.367	0.22	435.31
2022-08-16 12:54:22	230.487	8.892	547.223		2022-08-16 14:21:04	247.745	12.954	627.365		2022-08-21 15:40:30	0.401	0.217	434.881
2022-08-16 12:54:23	234.214	9.804	545.219		2022-08-16 14:21:05	255.607	14.438	677.311		2022-08-21 15:40:31	0.461	0.218	435.167
2022-08-16 12:54:24	237.393	10.946	568.833		2022-08-16 14:21:06	256.682	15.932	676.881		2022-08-21 15:40:32	0.454	0.218	435.31
2022-08-16 12:54:25	230.48	11.983	603.179		2022-08-16 14:21:07	247.084	17.49	697.489		2022-08-21 15:40:33	0.354	0.217	435.167
2022-08-16 12:54:26	230.46	12.932	603.036		2022-08-16 14:21:08	230.44	18.64	697.632		2022-08-21 15:40:34	0.281	0.217	434.595
2022-08-16 12:54:27	241.507	14.04	622.499		2022-08-16 14:21:09	230.393	19.244	730.977		2022-08-21 15:40:35	0.321	0.217	434.881
2022-08-16 12:54:28	245.722	14.982	659.994		2022-08-16 14:21:10	230.4	19.515	700.781		2022-08-21 15:40:36	0.427	0.217	435.31
2022-08-16 12:54:29	244.506	16.042	659.994		2022-08-16 14:21:11	230.413	19.647	699.063		2022-08-21 15:40:37	0.347	0.217	435.024
2022-08-16 12:54:30	243.725	17.275	696.917		2022-08-16 14:21:12	230.407	19.801	680.459		2022-08-21 15:40:38	0.281	0.218	434.738
2022-08-16 12:54:31	243.01	18.273	732.981		2022-08-16 14:21:13	230.407	19.826	713.947		2022-08-21 15:40:39	0.307	0.217	435.167
2022-08-16 12:54:32	230.48	19.073	733.267		2022-08-16 14:21:14	230.4	19.835	713.804		2022-08-21 15:40:40	0.321	0.217	434.738
2022-08-16 12:54:33	229.966	19.684	769.045		2022-08-16 14:21:15	230.427	19.849	733.41		2022-08-21 15:40:41	0.274	0.214	435.024
2022-08-16 12:54:34	163.883	19.841	768.901		2022-08-16 14:21:16	224.609	19.856	748.294		2022-08-21 15:40:42	0.374	0.217	434.738
2022-08-16 12:54:35	111.086	19.629	769.045		2022-08-16 14:21:17	196.818	19.815	747.578		2022-08-21 15:40:43	0.381	0.215	434.738
2022-08-16 12:54:36	76.221	18.882	768.615		2022-08-16 14:21:18	185.637	19.479	754.877		2022-08-21 15:40:44	0.394	0.214	435.31
2022-08-16 12:54:37	75.567	18.108	768.758		2022-08-16 14:21:19	165.219	19.073	754.447		2022-08-21 15:40:45	1.276	0.214	434.595
2022-08-16 12:54:38	113.898	17.278	732.838		2022-08-16 14:21:20	122.38	18.65	732.265		2022-08-21 15:40:46	1.236	0.217	435.167
2022-08-16 12:54:39	173.274	16.55	732.694		2022-08-16 14:21:21	93.767	17.949	697.06		2022-08-21 15:40:47	0.534	0.217	435.31
2022-08-16 12:54:40	175.245	15.983	695.486		2022-08-16 14:21:22	120.71	17.281	697.346		2022-08-21 15:40:48	1.162	0.22	435.024
2022-08-16 12:54:41	155.127	15.608	685.611		2022-08-16 14:21:23	146.685	16.71	661.712		2022-08-21 15:40:49	1.256	0.221	435.167
2022-08-16 12:54:42	152.609	15.252	685.897		2022-08-16 14:21:24	170.783	16.143	637.955		2022-08-21 15:40:50	1.282	0.221	435.31
2022-08-16 12:54:43	147.266	14.983	678.885		2022-08-16 14:21:25	201.901	15.931	636.81		2022-08-21 15:40:51	1.276	0.223	434.738
2022-08-16 12:54:44	133.227	14.783	641.676		2022-08-16 14:21:26	224.863	15.799	644.681		2022-08-21 15:40:52	1.269	0.224	435.167
2022-08-16 12:54:45	125.806	14.419	641.962		2022-08-16 14:21:27	230.427	15.946	645.254		2022-08-21 15:40:53	1.336	0.226	435.597
2022-08-16 12:54:46	126.655	14.041	604.61		2022-08-16 14:21:28	231.769	16.243	659.994		2022-08-21 15:40:54	1.403	0.226	435.024
2022-08-16 12:54:47	127.322	13.673	566.829		2022-08-16 14:21:29	239.003	16.921	678.742		2022-08-21 15:40:55	1.282	0.226	435.883
2022-08-16 12:54:48	121.732	13.269	567.402		2022-08-16 14:21:30	240.145	17.674	678.742		2022-08-21 15:40:56	1.155	0.224	436.455
2022-08-16 12:54:49	111.046	12.901	547.08		2022-08-16 14:21:31	233.987	18.482	696.917		2022-08-21 15:40:57	0.474	0.226	435.597
2022-08-16 12:54:50	99.785	12.528	547.509		2022-08-16 14:21:32	230.427	19.054	697.775		2022-08-21 15:40:58	0.347	0.227	435.883
2022-08-16 12:54:51	75.653	12.143	546.937		2022-08-16 14:21:33	228.704	19.446	697.919		2022-08-21 15:40:59	0.307	0.226	436.312
2022-08-16 12:54:52	53.686	11.683	547.938		2022-08-16 14:21:34	230.407	19.477	698.491		2022-08-21 15:41:00	0.354	0.226	435.31
2022-08-16 12:54:53	40.762	11.12	548.082		2022-08-16 14:21:35	230.44	19.645	732.122		2022-08-21 15:41:01	0.574	0.223	435.883
2022-08-16 12:54:54	36.621	10.511	541.785		2022-08-16 14:21:36	242.122	20.02	731.979		2022-08-21 15:41:02	1.249	0.224	435.453
2022-08-16 12:54:55	39.279	9.777	532.053		2022-08-16 14:21:37	242.028	20.597	750.297		2022-08-21 15:41:03	1.169	0.224	436.169
2022-08-16 12:54:56	55.042	9.217	531.91		2022-08-16 14:21:38	232.157	20.994	750.154		2022-08-21 15:41:04	0.461	0.224	435.74
2022-08-16 12:54:57	65.141	8.84	514.88		2022-08-16 14:21:39	230.447	21.355	769.474		2022-08-21 15:41:05	0.374	0.223	435.597
2022-08-16 12:54:58	66.002	8.463	515.595		2022-08-16 14:21:40	230.387	21.48	787.506		2022-08-21 15:41:06	0.327	0.221	435.883
2022-08-16 12:54:59	65.929	8.093	511.731		2022-08-16 14:21:41	230.413	21.373	787.363		2022-08-21 15:41:07	0.281	0.221	435.167
2022-08-16 12:55:00	67.712	7.74	496.419		2022-08-16 14:21:42	230.4	21.335	787.792		2022-08-21 15:41:08	0.247	0.221	435.31
2022-08-16 12:55:01	60.806	7.527	496.705		2022-08-16 14:21:43	230.413	21.236	789.509		2022-08-21 15:41:09	0.234	0.218	435.31
2022-08-16 12:55:02	53.686	7.143	493.986		2022-08-16 14:21:44	230.407	21.178	789.223		2022-08-21 15:41:10	0.247	0.218	435.31
2022-08-16 12:55:03	52.931	6.93	477.528		2022-08-16 14:21:45	230.407	21.147	770.19		2022-08-21 15:41:11	0.254	0.218	435.31
2022-08-16 12:55:04	49.412	6.587	477.385		2022-08-16 14:21:46	185.043	20.833	752.158		2022-08-21 15:41:12	0.254	0.215	435.31
2022-08-16 12:55:05	50.393	6.384	474.666		2022-08-16 14:21:47	171.798	20.584	751.585		2022-08-21 15:41:13	0.26	0.214	435.31
2022-08-16 12:55:06	59.236	6.183	475.238		2022-08-16 14:21:48	184.061	20.043	734.698		2022-08-21 15:41:14	0.414	0.217	435.024
2022-08-16 12:55:07	65.234	5.997	475.095		2022-08-16 14:21:49	205.354	19.651	734.412		2022-08-21 15:41:15	0.468	0.217	434.595
2022-08-16 12:55:08	67.712	5.807	475.524		2022-08-16 14:21:50	230.44	19.457	731.836		2022-08-21 15:41:16	0.387	0.217	434.738
2022-08-16 12:55:09	77.964	5.751	475.811		2022-08-16 14:21:51	238.228	19.651	733.124		2022-08-21 15:41:17	0.387	0.22	434.595
2022-08-16 12:55:10	86.968	5.745	478.53		2022-08-16 14:21:52	230.44	20.027	733.41		2022-08-21 15:41:18	0.441	0.22	434.595
2022-08-16 12:55:11	94.735	5.748	495.417		2022-08-16 14:21:53	219.734	20.214	734.412		2022-08-21 15:41:19	0.541	0.218	434.738
2022-08-16 12:55:12	116.209	5.8	495.131		2022-08-16 14:21:54	153.538	20.023	734.555		2022-08-21 15:41:20	1.162	0.22	434.738
2022-08-16 12:55:13	142.25	6.008	509.442		2022-08-16 14:21:55	105.836	19.469	714.519		2022-08-21 15:41:21	1.249	0.22	434.738
2022-08-16 12:55:14	138.85	6.351	512.733		2022-08-16 14:21:56	74.411	18.606	679.314		2022-08-21 15:41:22	1.289	0.22	435.597
2022-08-16 12:55:15	106.664	6.577	512.59		2022-08-16 14:21:57	59.089	17.679	680.316		2022-08-21 15:41:23	1.236	0.221	435.453
2022-08-16 12:55:16	75.947	6.758	513.163		2022-08-16 14:21:58	47.555	16.713	643.68		2022-08-21 15:41:24	1.236	0.223	435.31
2022-08-16 12:55:17	53.987	6.759	513.449		2022-08-16 14:21:59	50.333	15.577	616.489		2022-08-21 15:41:25	1.302	0.224	435.74
2022-08-16 12:55:18	42.552	6.597	513.449		2022-08-16 14:22:00	45.277	14.778	616.775		2022-08-21 15:41:26	1.363	0.226	435.31
2022-08-16 12:55:19	38.177	6.415	512.733		2022-08-16 14:22:01	36.614	13.834	570.693		2022-08-21 15:41:27	1.322	0.227	434.165
2022-08-16 12:55:20	36.541	6.198	513.019		2022-08-16 14:22:02	49.358	12.74	549.083		2022-08-21 15:41:28	1.222	0.227	434.595
2022-08-16 12:55:21	55.777	5.997	512.876		2022-08-16 14:22:03	86.306	11.989	549.083		2022-08-21 15:41:29	0.568	0.227	434.595
2022-08-16 12:55:22	78.098	5.784	512.876		2022-08-16 14:22:04	118.947	11.52	550.658		2022-08-21 15:41:30	0.447	0.229	434.738
2022-08-16 12:55:23	120.403	5.767	512.876		2022-08-16 14:22:05	136.219	11.271	555.38		2022-08-21 15:41:31	0.347	0.227	434.595
2022-08-16 12:55:24	130.001	5.983	512.733		2022-08-16 14:22:06	124.464	11.116	553.949		2022-08-21 15:41:32	0.314	0.227	434.309
2022-08-16 12:55:25	149.056	6.19	513.163		2022-08-16 14:22:07	117.805	10.931	518.171		2022-08-21 15:41:33	0.361	0.226	434.881
2022-08-16 12:55:26	166.174	6.559	531.338		2022-08-16 14:22:08	158.527	10.768	524.468		2022-08-21 15:41:34	0.314	0.224	434.595
2022-08-16 12:55:27	160.01	6.951	549.942		2022-08-16 14:22:09	211.532	10.943	481.106		2022-08-21 15:41:35	0.26	0.224	435.74
2022-08-16 12:55:28	149.797	7.486	550.085		2022-08-16 14:22:10	230.453	11.34	491.839		2022-08-21 15:41:36	0.24	0.22	434.595
2022-08-16 12:55:29	139.558	7.821	550.085		2022-08-16 14:22:11	245.368	12.179	532.626		2022-08-21 15:41:37	0.234	0.22	434.738
2022-08-16 12:55:30	123.849	8.093	549.942		2022-08-16 14:22:12	237.293	13.504	597.312		2022-08-21 15:41:38	0.22	0.221	434.738
2022-08-16 12:55:31	122.24	8.286	549.942		2022-08-16 14:22:13	245.421	14.628	599.315		2022-08-21 15:41:39	0.214	0.22	435.167
2022-08-16 12:55:32	125.693	8.467	555.094		2022-08-16 14:22:14	257.363	15.773	642.678		2022-08-21 15:41:40	0.207	0.218	435.167
2022-08-16 12:55:33	124.183	8.603	567.115		2022-08-16 14:22:15	264.443	17.483	696.631		2022-08-21 15:41:41	0.214	0.218	434.595
2022-08-16 12:55:34	111.166	8.674	567.688		2022-08-16 14:22:16	260.502	19.215	696.774		2022-08-21 15:41:42	0.227	0.215	435.167
2022-08-16 12:55:35	100.787	8.689	586.149		2022-08-16 14:22:17	255.406	20.776	736.415		2022-08-21 15:41:43	0.281	0.214	434.452
2022-08-16 12:55:36	89.386	8.681	596.596		2022-08-16 14:22:18	243.778	21.913	804.393		2022-08-21 15:41:44	0.327	0.215	434.309
2022-08-16 12:55:37	80.609	8.649	604.61		2022-08-16 14:22:19	230.44	22.697	804.822		2022-08-21 15:41:45	0.447	0.217	434.165
2022-08-16 12:55:38	67.886	8.476	592.303		2022-08-16 14:22:20	230.4	23.042	788.365		2022-08-21 15:41:46	0.534	0.215	434.022
2022-08-16 12:55:39	66.917	8.285	593.877		2022-08-16 14:22:21	230.407	22.914	776.63		2022-08-21 15:41:47	0.468	0.217	434.595
2022-08-16 12:55:40	73.93	8.093	586.435		2022-08-16 14:22:22	235.449	22.889	773.481		2022-08-21 15:41:48	0.494	0.218	434.022
2022-08-16 12:55:41	75.72	7.901	565.112		2022-08-16 14:22:23	249.876	23.246	826.575		2022-08-21 15:41:49	0.554	0.217	434.452
2022-08-16 12:55:42	94.882	7.723	564.969		2022-08-16 14:22:24	239.143	23.663	826.432		2022-08-21 15:41:50	0.641	0.217	434.165
2022-08-16 12:55:43	111.68	7.705	546.651		2022-08-16 14:22:25	230.44	23.947	896.556		2022-08-21 15:41:51	0.554	0.218	434.738
2022-08-16 12:55:44	89.225	7.705	536.347		2022-08-16 14:22:26	228.937	23.887	839.884		2022-08-21 15:41:52	0.454	0.221	433.879
2022-08-16 12:55:45	61.768	7.648	531.767		2022-08-16 14:22:27	196.838	23.548	839.741		2022-08-21 15:41:53	0.347	0.221	434.165
2022-08-16 12:55:46	41.771	7.48	529.763		2022-08-16 14:22:28	201.086	23.058	787.935		2022-08-21 15:41:54	0.361	0.223	434.738
2022-08-16 12:55:47	29.748	7.119	529.62		2022-08-16 14:22:29	192.59	22.5	787.363		2022-08-21 15:41:55	0.514	0.22	434.738
2022-08-16 12:55:48	35.332	6.761	512.59		2022-08-16 14:22:30	171.184	21.796	760.029		2022-08-21 15:41:56	0.501	0.221	434.738
2022-08-16 12:55:49	100.66	6.557	494.988		2022-08-16 14:22:31	192.543	21.18	733.839		2022-08-21 15:41:57	0.421	0.221	434.452
2022-08-16 12:55:50	161.052	6.565	494.988		2022-08-16 14:22:32	224.175	20.786	733.982		2022-08-21 15:41:58	0.314	0.221	435.883
2022-08-16 12:55:51	176.079	6.774	513.735		2022-08-16 14:22:33	222.913	20.574	716.237		2022-08-21 15:41:59	0.267	0.22	435.74
2022-08-16 12:55:52	159.522	7.154	532.483		2022-08-16 14:22:34	219.319	20.223	696.344		2022-08-21 15:42:00	0.267	0.218	435.883
2022-08-16 12:55:53	177.622	7.717	532.053		2022-08-16 14:22:35	230.413	20.02	696.201		2022-08-21 15:42:01	0.367	0.22	435.74
2022-08-16 12:55:54	196.784	8.158	549.799		2022-08-16 14:22:36	230.387	19.849	715.807		2022-08-21 15:42:02	0.434	0.22	435.597
2022-08-16 12:55:55	224.322	8.753	550.085		2022-08-16 14:22:37	230.4	19.812	733.696		2022-08-21 15:42:03	0.454	0.22	435.024
2022-08-16 12:55:56	212.333	9.231	567.688		2022-08-16 14:22:38	218.772	19.645	733.839		2022-08-21 15:42:04	0.541	0.217	435.74
2022-08-16 12:55:57	194.567	9.803	593.877		2022-08-16 14:22:39	208.025	19.458	711.943		2022-08-21 15:42:05	0.548	0.22	435.453
2022-08-16 12:55:58	178.704	10.358	593.734		2022-08-16 14:22:40	220.735	19.118	711.371		2022-08-21 15:42:06	0.488	0.22	435.31
2022-08-16 12:55:59	170.182	10.762	616.059		2022-08-16 14:22:41	230.4	19.057	678.169		2022-08-21 15:42:07	0.381	0.221	435.167
2022-08-16 12:56:00	176.861	11.119	608.188		2022-08-16 14:22:42	230.38	19.062	697.489		2022-08-21 15:42:08	0.341	0.22	434.595
2022-08-16 12:56:01	170.082	11.331	622.929		2022-08-16 14:22:43	230.393	19.068	698.062		2022-08-21 15:42:09	0.374	0.22	434.738
2022-08-16 12:56:02	159.549	11.521	627.365		2022-08-16 14:22:44	227.221	19.066	717.811		2022-08-21 15:42:10	0.434	0.22	434.452
2022-08-16 12:56:03	159.943	11.701	630.943		2022-08-16 14:22:45	208.119	18.929	728.974		2022-08-21 15:42:11	1.249	0.22	434.022
2022-08-16 12:56:04	143.372	11.732	656.846		2022-08-16 14:22:46	196.718	18.851	730.119		2022-08-21 15:42:12	1.376	0.22	434.452
2022-08-16 12:56:05	107.472	11.729	677.167		2022-08-16 14:22:47	157.973	18.508	730.834		2022-08-21 15:42:13	2.164	0.224	434.452
2022-08-16 12:56:06	89.472	11.567	677.454		2022-08-16 14:22:48	134.329	18.108	730.691		2022-08-21 15:42:14	2.251	0.227	434.738
2022-08-16 12:56:07	131.036	11.355	653.84		2022-08-16 14:22:49	166.849	17.651	712.802		2022-08-21 15:42:15	2.097	0.23	434.738
2022-08-16 12:56:08	159.168	11.319	624.073		2022-08-16 14:22:50	163.082	17.273	695.199		2022-08-21 15:42:16	1.309	0.23	435.453
2022-08-16 12:56:09	141.415	11.313	624.073		2022-08-16 14:22:51	165.019	16.898	695.343		2022-08-21 15:42:17	1.155	0.232	435.167
2022-08-16 12:56:10	109.356	11.168	618.349		2022-08-16 14:22:52	166.769	16.538	682.606		2022-08-21 15:42:18	0.447	0.233	435.167
2022-08-16 12:56:11	86.173	11.114	604.181		2022-08-16 14:22:53	156.85	16.146	678.742		2022-08-21 15:42:19	0.341	0.23	435.167
2022-08-16 12:56:12	94.595	10.768	604.181		2022-08-16 14:22:54	135.604	15.787	679.028		2022-08-21 15:42:20	0.314	0.23	435.31
2022-08-16 12:56:13	133.407	10.576	602.464		2022-08-16 14:22:55	116.863	15.387	660.567		2022-08-21 15:42:21	0.474	0.23	435.167
2022-08-16 12:56:14	120.517	10.535	602.034		2022-08-16 14:22:56	106.457	14.866	642.678		2022-08-21 15:42:22	0.514	0.229	435.883
2022-08-16 12:56:15	98.496	10.232	586.865		2022-08-16 14:22:57	90.314	14.459	643.25		2022-08-21 15:42:23	0.574	0.229	435.31
2022-08-16 12:56:16	84.203	10.036	582.858		2022-08-16 14:22:58	71.105	13.888	620.353		2022-08-21 15:42:24	1.262	0.229	435.597
2022-08-16 12:56:17	67.732	9.807	566.543		2022-08-16 14:22:59	59.17	13.13	620.066		2022-08-21 15:42:25	1.262	0.232	435.024
2022-08-16 12:56:18	72.862	9.574	549.083		2022-08-16 14:23:00	59.083	12.525	572.554		2022-08-21 15:42:26	1.269	0.23	435.453
2022-08-16 12:56:19	81.758	9.232	549.083		2022-08-16 14:23:01	70.217	11.825	564.682		2022-08-21 15:42:27	1.256	0.232	435.883
2022-08-16 12:56:20	81.624	9.015	533.198		2022-08-16 14:23:02	81.204	11.334	565.255		2022-08-21 15:42:28	1.189	0.23	435.883
2022-08-16 12:56:21	82.479	8.848	529.62		2022-08-16 14:23:03	96.151	10.943	548.225		2022-08-21 15:42:29	1.155	0.232	435.167
2022-08-16 12:56:22	98.349	8.668	529.907		2022-08-16 14:23:04	130.642	10.707	549.227		2022-08-21 15:42:30	0.554	0.23	435.31
2022-08-16 12:56:23	98.536	8.497	530.336		2022-08-16 14:23:05	135.217	10.559	549.083		2022-08-21 15:42:31	0.514	0.229	435.31
2022-08-16 12:56:24	91.883	8.466	530.479		2022-08-16 14:23:06	163.984	10.563	549.227		2022-08-21 15:42:32	0.481	0.227	434.452
2022-08-16 12:56:25	73.717	8.3	531.051		2022-08-16 14:23:07	191.648	10.749	549.37		2022-08-21 15:42:33	0.514	0.227	434.738
2022-08-16 12:56:26	90.421	8.126	530.479		2022-08-16 14:23:08	201.82	11.07	549.799		2022-08-21 15:42:34	0.454	0.227	434.595
2022-08-16 12:56:27	97.16	8.09	530.479		2022-08-16 14:23:09	203.49	11.438	550.085		2022-08-21 15:42:35	0.374	0.227	434.738
2022-08-16 12:56:28	111.881	8.069	530.336		2022-08-16 14:23:10	193.051	11.747	549.942		2022-08-21 15:42:36	0.367	0.227	434.595
2022-08-16 12:56:29	132.485	8.083	529.763		2022-08-16 14:23:11	166.749	12.139	551.516		2022-08-21 15:42:37	0.327	0.226	434.595
2022-08-16 12:56:30	136.206	8.126	530.336		2022-08-16 14:23:12	175.044	12.327	567.115		2022-08-21 15:42:38	0.294	0.224	434.022
2022-08-16 12:56:31	127.449	8.3	527.044		2022-08-16 14:23:13	191.768	12.529	567.115		2022-08-21 15:42:39	0.281	0.226	434.738
2022-08-16 12:56:32	135.551	8.475	544.79		2022-08-16 14:23:14	215.873	12.758	604.61		2022-08-21 15:42:40	0.341	0.224	434.165
2022-08-16 12:56:33	136.58	8.657	543.645		2022-08-16 14:23:15	216.775	13.131	604.897		2022-08-21 15:42:41	0.427	0.224	435.167
2022-08-16 12:56:34	130.729	8.831	552.232		2022-08-16 14:23:16	208.813	13.67	626.363		2022-08-21 15:42:42	0.554	0.224	434.881
2022-08-16 12:56:35	118.753	8.856	556.668		2022-08-16 14:23:17	191.795	13.899	642.392		2022-08-21 15:42:43	1.182	0.226	434.165
2022-08-16 12:56:36	102.183	8.867	554.665		2022-08-16 14:23:18	188.028	14.092	642.392		2022-08-21 15:42:44	1.256	0.226	434.738
2022-08-16 12:56:37	83.394	8.864	566.829		2022-08-16 14:23:19	198.888	14.281	658.992		2022-08-21 15:42:45	1.256	0.227	434.165
2022-08-16 12:56:38	67.739	8.846	566.257		2022-08-16 14:23:20	217.196	14.567	661.712		2022-08-21 15:42:46	1.256	0.224	435.024
2022-08-16 12:56:39	51.996	8.662	552.947		2022-08-16 14:23:21	207.444	14.805	662.57		2022-08-21 15:42:47	1.302	0.226	434.165
2022-08-16 12:56:40	40.108	8.399	549.37		2022-08-16 14:23:22	196.11	14.846	678.599		2022-08-21 15:42:48	1.262	0.227	434.452
2022-08-16 12:56:41	32.367	8.06	549.37		2022-08-16 14:23:23	178.938	15.004	673.16		2022-08-21 15:42:49	1.276	0.227	434.881
2022-08-16 12:56:42	29	7.667	533.198		2022-08-16 14:23:24	213.188	15.054	673.59		2022-08-21 15:42:50	1.222	0.23	435.453
2022-08-16 12:56:43	42.639	7.131	529.907		2022-08-16 14:23:25	230.393	15.341	660.28		2022-08-21 15:42:51	1.142	0.23	435.167
2022-08-16 12:56:44	107.573	6.811	529.048		2022-08-16 14:23:26	228.864	15.58	660.424		2022-08-21 15:42:52	1.189	0.232	435.453
2022-08-16 12:56:45	162.568	6.892	529.191		2022-08-16 14:23:27	230.42	15.943	679.887		2022-08-21 15:42:53	1.182	0.232	434.738
2022-08-16 12:56:46	174.984	7.134	529.477		2022-08-16 14:23:28	234.728	16.538	697.775		2022-08-21 15:42:54	1.222	0.232	434.881
2022-08-16 12:56:47	136.994	7.536	530.479		2022-08-16 14:23:29	253.149	17.458	697.632		2022-08-21 15:42:55	0.601	0.232	435.31
2022-08-16 12:56:48	95.33	7.744	514.307		2022-08-16 14:23:30	251.492	18.516	731.693		2022-08-21 15:42:56	1.189	0.23	435.167
2022-08-16 12:56:49	64.339	7.884	514.451		2022-08-16 14:23:31	231.355	19.656	731.979		2022-08-21 15:42:57	1.176	0.23	434.595
2022-08-16 12:56:50	45.304	7.728	511.588		2022-08-16 14:23:32	220.014	20.219	750.87		2022-08-21 15:42:58	0.534	0.23	434.022
2022-08-16 12:56:51	57.493	7.544	494.272		2022-08-16 14:23:33	156.864	20.22	732.981		2022-08-21 15:42:59	0.414	0.23	434.595
2022-08-16 12:56:52	95.477	7.349	494.272		2022-08-16 14:23:34	121.899	19.846	732.838		2022-08-21 15:43:00	0.327	0.23	434.309
2022-08-16 12:56:53	138.51	7.336	477.385		2022-08-16 14:23:35	105.288	19.206	715.235		2022-08-21 15:43:01	0.281	0.229	434.595
2022-08-16 12:56:54	156.69	7.538	511.016		2022-08-16 14:23:36	104.734	18.485	695.343		2022-08-21 15:43:02	0.287	0.229	434.452
2022-08-16 12:56:55	162.822	7.864	510.014		2022-08-16 14:23:37	106.557	17.689	695.772		2022-08-21 15:43:03	0.287	0.229	434.022
2022-08-16 12:56:56	155.869	8.118	531.051		2022-08-16 14:23:38	112.889	17.083	675.736		2022-08-21 15:43:04	0.274	0.226	434.022
2022-08-16 12:56:57	120.283	8.466	532.053		2022-08-16 14:23:39	118.706	16.357	662.57		2022-08-21 15:43:05	0.247	0.224	434.022
2022-08-16 12:56:58	120.39	8.646	547.366		2022-08-16 14:23:40	120.43	15.755	662.284		2022-08-21 15:43:06	0.247	0.223	434.165
2022-08-16 12:56:59	131.65	8.785	552.518		2022-08-16 14:23:41	118.179	15.209	660.28		2022-08-21 15:43:07	0.361	0.223	434.022
2022-08-16 12:57:00	141.315	8.852	552.518		2022-08-16 14:23:42	99.07	14.814	660.28		2022-08-21 15:43:08	0.554	0.221	434.165
2022-08-16 12:57:01	163.155	9.02	552.232		2022-08-16 14:23:43	82.506	14.275	626.936		2022-08-21 15:43:09	1.209	0.223	433.593
2022-08-16 12:57:02	174.991	9.235	552.089		2022-08-16 14:23:44	88.691	13.701	603.895		2022-08-21 15:43:10	1.162	0.224	434.022
2022-08-16 12:57:03	188.489	9.599	552.518		2022-08-16 14:23:45	124.965	13.143	604.61		2022-08-21 15:43:11	0.494	0.223	434.165
2022-08-16 12:57:04	196.945	9.978	584.861		2022-08-16 14:23:46	181.209	12.922	548.511		2022-08-21 15:43:12	0.407	0.223	434.165
2022-08-16 12:57:05	190.286	10.382	584.861		2022-08-16 14:23:47	230.487	13.083	496.276		2022-08-21 15:43:13	0.461	0.224	434.165
2022-08-16 12:57:06	181.596	10.774	607.329		2022-08-16 14:23:48	230.393	13.49	496.419		2022-08-21 15:43:14	0.447	0.226	434.165
2022-08-16 12:57:07	182.905	11.136	640.388		2022-08-16 14:23:49	230.393	13.88	532.339		2022-08-21 15:43:15	0.461	0.227	434.022
2022-08-16 12:57:08	162.434	11.356	640.531		2022-08-16 14:23:50	230.407	14.313	532.196		2022-08-21 15:43:16	0.534	0.227	434.881
2022-08-16 12:57:09	157.525	11.53	660.71		2022-08-16 14:23:51	230.4	14.794	569.834		2022-08-21 15:43:17	0.574	0.224	434.452
2022-08-16 12:57:10	207.978	11.719	659.851		2022-08-16 14:23:52	198.027	15.004	587.437		2022-08-21 15:43:18	0.534	0.224	434.165
2022-08-16 12:57:11	193.712	11.98	659.708		2022-08-16 14:23:53	150.612	15.182	587.58		2022-08-21 15:43:19	0.427	0.224	434.165
2022-08-16 12:57:12	201.046	12.319	659.136		2022-08-16 14:23:54	118.86	15.025	605.469		2022-08-21 15:43:20	0.327	0.224	434.452
2022-08-16 12:57:13	192.623	12.538	659.994		2022-08-16 14:23:55	88.491	14.814	587.151		2022-08-21 15:43:21	0.367	0.226	434.309
2022-08-16 12:57:14	139.752	12.726	659.994		2022-08-16 14:23:56	63.384	14.419	587.008		2022-08-21 15:43:22	0.501	0.223	434.595
2022-08-16 12:57:15	94.482	12.714	661.568		2022-08-16 14:23:57	46.219	13.695	568.26		2022-08-21 15:43:23	1.169	0.224	434.309
2022-08-16 12:57:16	64.119	12.433	661.425		2022-08-16 14:23:58	41.737	12.92	564.826		2022-08-21 15:43:24	1.216	0.224	434.165
2022-08-16 12:57:17	43.881	11.973	641.39		2022-08-16 14:23:59	41.811	12.206	566.257		2022-08-21 15:43:25	1.242	0.226	434.738
2022-08-16 12:57:18	32.28	11.494	620.925		2022-08-16 14:24:00	40.148	11.536	551.087		2022-08-21 15:43:26	1.229	0.224	434.452
2022-08-16 12:57:19	24.425	10.771	621.641		2022-08-16 14:24:01	40.168	10.942	551.087		2022-08-21 15:43:27	1.222	0.224	434.165
2022-08-16 12:57:20	19.222	10.012	570.836		2022-08-16 14:24:02	41.958	10.208	548.082		2022-08-21 15:43:28	0.554	0.226	434.309
2022-08-16 12:57:21	15.856	9.402	570.693		2022-08-16 14:24:03	44.469	9.651	532.053		2022-08-21 15:43:29	0.434	0.226	434.881
2022-08-16 12:57:22	14.066	8.839	548.797		2022-08-16 14:24:04	47.682	9.226	531.91		2022-08-21 15:43:30	0.374	0.227	435.31
2022-08-16 12:57:23	13.138	8.212	514.451		2022-08-16 14:24:05	49.391	8.854	499.71		2022-08-21 15:43:31	0.407	0.224	434.165
2022-08-16 12:57:24	17.499	7.59	514.88		2022-08-16 14:24:06	46.119	8.488	475.524		2022-08-21 15:43:32	0.354	0.226	434.595
2022-08-16 12:57:25	33.208	6.954	494.988		2022-08-16 14:24:07	40.942	8.114	475.668		2022-08-21 15:43:33	0.321	0.226	434.165
2022-08-16 12:57:26	45.999	6.565	476.526		2022-08-16 14:24:08	36.561	7.826	457.206		2022-08-21 15:43:34	0.347	0.224	434.595
2022-08-16 12:57:27	50.246	6.199	476.669		2022-08-16 14:24:09	30.817	7.506	456.777		2022-08-21 15:43:35	0.407	0.227	434.309
2022-08-16 12:57:28	45.371	5.991	458.494		2022-08-16 14:24:10	27.017	6.969	434.165		2022-08-21 15:43:36	0.514	0.226	434.595
2022-08-16 12:57:29	38.485	5.74	439.604		2022-08-16 14:24:11	23.59	6.719	433.736		2022-08-21 15:43:37	0.588	0.226	434.738
2022-08-16 12:57:30	29.742	5.537	439.317		2022-08-16 14:24:12	19.924	6.37	433.736		2022-08-21 15:43:38	0.488	0.224	434.881
2022-08-16 12:57:31	29.708	5.198	432.591		2022-08-16 14:24:13	16.577	6.005	433.021		2022-08-21 15:43:39	0.474	0.226	434.595
2022-08-16 12:57:32	44.342	4.998	433.021		2022-08-16 14:24:14	14.099	5.732	432.305		2022-08-21 15:43:40	0.401	0.227	434.738
2022-08-16 12:57:33	60.018	4.824	435.167		2022-08-16 14:24:15	12.456	5.371	432.162		2022-08-21 15:43:41	0.387	0.224	434.881
2022-08-16 12:57:34	61.654	4.796	440.605		2022-08-16 14:24:16	11.448	5.151	430.874		2022-08-21 15:43:42	0.361	0.227	435.31
2022-08-16 12:57:35	63.391	4.788	439.174		2022-08-16 14:24:17	11.595	4.8	430.445		2022-08-21 15:43:43	0.334	0.226	435.167
2022-08-16 12:57:36	60.893	4.788	456.634		2022-08-16 14:24:18	12.356	4.595	417.135		2022-08-21 15:43:44	0.387	0.226	435.024
2022-08-16 12:57:37	46.987	4.781	459.496		2022-08-16 14:24:19	13.245	4.226	416.133		2022-08-21 15:43:45	0.414	0.224	435.167
2022-08-16 12:57:38	35.653	4.726	459.353		2022-08-16 14:24:20	14.073	4.031	415.704		2022-08-21 15:43:46	0.581	0.226	435.024
2022-08-16 12:57:39	26.115	4.597	459.496		2022-08-16 14:24:21	14.086	3.844	415.132		2022-08-21 15:43:47	1.302	0.223	435.024
2022-08-16 12:57:40	20.177	4.387	459.496		2022-08-16 14:24:22	13.251	3.664	413.557		2022-08-21 15:43:48	1.236	0.224	435.024
2022-08-16 12:57:41	18.254	4.129	460.068		2022-08-16 14:24:23	11.408	3.611	413.701		2022-08-21 15:43:49	1.169	0.227	435.167
2022-08-16 12:57:42	19.917	4	458.065		2022-08-16 14:24:24	9.685	3.443	412.413		2022-08-21 15:43:50	1.282	0.227	434.452
2022-08-16 12:57:43	18.174	3.722	457.779		2022-08-16 14:24:25	8.195	3.269	398.245		2022-08-21 15:43:51	1.222	0.226	434.595
2022-08-16 12:57:44	14.854	3.623	452.341		2022-08-16 14:24:26	7.207	3.109	397.958		2022-08-21 15:43:52	0.541	0.229	434.595
2022-08-16 12:57:45	12.41	3.419	443.181		2022-08-16 14:24:27	6.358	3.057	397.815		2022-08-21 15:43:53	0.421	0.227	434.452
2022-08-16 12:57:46	10.646	3.239	441.607		2022-08-16 14:24:28	5.61	2.898	397.672		2022-08-21 15:43:54	0.367	0.227	434.595
2022-08-16 12:57:47	9.023	3.037	438.459		2022-08-16 14:24:29	5.524	2.883	397.386		2022-08-21 15:43:55	0.314	0.224	434.595
2022-08-16 12:57:48	8.122	2.887	435.024		2022-08-16 14:24:30	5.457	2.85	397.386		2022-08-21 15:43:56	1.256	0.224	434.452
2022-08-16 12:57:49	7.2	2.722	434.309		2022-08-16 14:24:31	5.276	2.709	397.243		2022-08-21 15:43:57	1.336	0.226	435.167
2022-08-16 12:57:50	6.358	2.534	432.734		2022-08-16 14:24:32	4.762	2.676	396.67		2022-08-21 15:43:58	1.249	0.226	434.881
2022-08-16 12:57:51	5.59	2.474	432.305		2022-08-16 14:24:33	4.715	2.532	396.957		2022-08-21 15:43:59	1.262	0.226	435.167
2022-08-16 12:57:52	5.504	2.308	417.278		2022-08-16 14:24:34	4.689	2.51	396.957		2022-08-21 15:44:00	1.436	0.227	434.738
2022-08-16 12:57:53	5.296	2.136	414.989		2022-08-16 14:24:35	4.662	2.482	397.243		2022-08-21 15:44:01	1.383	0.229	434.595
2022-08-16 12:57:54	4.769	2.064	414.845		2022-08-16 14:24:36	4.629	2.353	397.1		2022-08-21 15:44:02	1.242	0.23	435.024
2022-08-16 12:57:55	4.735	1.928	414.702		2022-08-16 14:24:37	4.582	2.329	396.814		2022-08-21 15:44:03	0.528	0.23	434.738
2022-08-16 12:57:56	4.755	1.764	414.273		2022-08-16 14:24:38	4.488	2.313	396.241		2022-08-21 15:44:04	0.421	0.23	435.31
2022-08-16 12:57:57	5.343	1.732	414.273		2022-08-16 14:24:39	3.967	2.292	396.527		2022-08-21 15:44:05	0.374	0.229	435.167
2022-08-16 12:57:58	5.497	1.585	414.273		2022-08-16 14:24:40	3.927	2.261	396.098		2022-08-21 15:44:06	0.367	0.229	435.024
2022-08-16 12:57:59	5.584	1.552	414.416		2022-08-16 14:24:41	3.907	2.157	395.955		2022-08-21 15:44:07	0.401	0.226	434.595
2022-08-16 12:58:00	6.312	1.494	413.557		2022-08-16 14:24:42	3.894	2.146	396.241		2022-08-21 15:44:08	1.209	0.227	434.595
2022-08-16 12:58:01	6.358	1.363	413.844		2022-08-16 14:24:43	3.874	2.14	396.527		2022-08-21 15:44:09	1.322	0.226	434.595
2022-08-16 12:58:02	6.232	1.203	413.271		2022-08-16 14:24:44	3.867	2.136	396.67		2022-08-21 15:44:10	1.296	0.226	435.597
2022-08-16 12:58:03	5.477	1.184	413.557		2022-08-16 14:24:45	3.847	2.131	396.527		2022-08-21 15:44:11	1.276	0.227	435.597
2022-08-16 12:58:04	4.709	1.17	413.557		2022-08-16 14:24:46	3.84	2.128	396.957		2022-08-21 15:44:12	1.276	0.229	434.881
2022-08-16 12:58:05	4.555	1.153	413.271		2022-08-16 14:24:47	3.82	2.125	396.957		2022-08-21 15:44:13	1.229	0.227	434.738
2022-08-16 12:58:06	3.901	1.014	413.414		2022-08-16 14:24:48	3.82	2.124	396.814		2022-08-21 15:44:14	1.169	0.23	435.167
2022-08-16 12:58:07	3.914	0.997	413.844		2022-08-16 14:24:49	3.807	2.121	396.814		2022-08-21 15:44:15	0.541	0.232	434.881
2022-08-16 12:58:08	4.562	0.989	413.701		2022-08-16 14:24:50	3.787	2.116	396.814		2022-08-21 15:44:16	0.534	0.23	435.167
2022-08-16 12:58:09	3.981	0.98	413.128		2022-08-16 14:24:51	3.787	2.118	396.957		2022-08-21 15:44:17	0.468	0.229	434.738
2022-08-16 12:58:10	3.847	0.974	413.414		2022-08-16 14:24:52	3.767	2.116	396.814		2022-08-21 15:44:18	0.381	0.23	434.595
2022-08-16 12:58:11	3.767	0.962	413.557		2022-08-16 14:24:53	3.754	2.115	396.241		2022-08-21 15:44:19	0.307	0.227	434.738
2022-08-16 12:58:12	3.587	0.863	413.557		2022-08-16 14:24:54	3.74	2.115	396.527		2022-08-21 15:44:20	0.274	0.227	435.31
2022-08-16 12:58:13	3.039	0.814	413.414		2022-08-16 14:24:55	3.72	2.116	396.814		2022-08-21 15:44:21	0.548	0.227	434.738
2022-08-16 12:58:14	2.992	0.808	413.557		2022-08-16 14:24:56	3.694	2.116	396.814		2022-08-21 15:44:22	1.282	0.226	434.881
2022-08-16 12:58:15	2.965	0.802	413.557		2022-08-16 14:24:57	3.62	2.119	396.384		2022-08-21 15:44:23	1.276	0.229	434.452
2022-08-16 12:58:16	2.945	0.798	413.414		2022-08-16 14:24:58	3.493	2.119	396.814		2022-08-21 15:44:24	1.182	0.227	435.597
2022-08-16 12:58:17	2.919	0.792	413.701		2022-08-16 14:24:59	3.106	2.121	396.384		2022-08-21 15:44:25	1.162	0.227	435.74
2022-08-16 12:58:18	2.892	0.787	413.701		2022-08-16 14:25:00	3.086	2.124	396.527		2022-08-21 15:44:26	0.561	0.229	435.31
2022-08-16 12:58:19	2.859	0.784	413.987		2022-08-16 14:25:01	3.072	2.125	396.67		2022-08-21 15:44:27	0.468	0.229	435.597
2022-08-16 12:58:20	2.805	0.777	413.557		2022-08-16 14:25:02	3.052	2.125	396.67		2022-08-21 15:44:28	1.196	0.229	435.024
2022-08-16 12:58:21	2.371	0.766	413.557		2022-08-16 14:25:03	3.039	2.127	396.527		2022-08-21 15:44:29	1.189	0.23	435.024
2022-08-16 12:58:22	2.244	0.744	413.701		2022-08-16 14:25:04	3.026	2.13	396.241		2022-08-21 15:44:30	1.169	0.229	435.74
2022-08-16 12:58:23	2.217	0.649	413.271		2022-08-16 14:25:05	3.019	2.13	396.957		2022-08-21 15:44:31	0.528	0.23	435.74
2022-08-16 12:58:24	2.204	0.652	413.414		2022-08-16 14:25:06	3.006	2.133	396.957		2022-08-21 15:44:32	1.149	0.229	435.597
2022-08-16 12:58:25	2.184	0.643	413.844		2022-08-16 14:25:07	2.999	2.134	397.386		2022-08-21 15:44:33	1.329	0.229	435.597
2022-08-16 12:58:26	2.171	0.633	413.414		2022-08-16 14:25:08	2.999	2.137	398.388		2022-08-21 15:44:34	1.369	0.229	435.883
2022-08-16 12:58:27	2.164	0.633	412.985		2022-08-16 14:25:09	2.992	2.137	398.531		2022-08-21 15:44:35	1.269	0.23	435.167
2022-08-16 12:58:28	2.151	0.627	413.128		2022-08-16 14:25:10	2.979	2.137	399.676		2022-08-21 15:44:36	0.588	0.23	435.883
2022-08-16 12:58:29	2.151	0.622	413.414		2022-08-16 14:25:11	2.979	2.14	400.105		2022-08-21 15:44:37	0.574	0.23	435.883
2022-08-16 12:58:30	2.137	0.618	413.414		2022-08-16 14:25:12	2.979	2.14	401.25		2022-08-21 15:44:38	0.554	0.23	435.31
2022-08-16 12:58:31	2.131	0.621	413.271		2022-08-16 14:25:13	3.012	2.143	400.391		2022-08-21 15:44:39	1.222	0.23	434.881
2022-08-16 12:58:32	2.124	0.619	413.557		2022-08-16 14:25:14	3.567	2.145	399.246		2022-08-21 15:44:40	1.182	0.23	434.452
2022-08-16 12:58:33	2.117	0.619	413.271		2022-08-16 14:25:15	3.747	2.148	403.826		2022-08-21 15:44:41	1.162	0.23	434.452
2022-08-16 12:58:34	2.111	0.619	413.414		2022-08-16 14:25:16	3.734	2.157	398.817		2022-08-21 15:44:42	1.236	0.233	434.595
2022-08-16 12:58:35	2.111	0.618	413.271		2022-08-16 14:25:17	3.647	2.16	399.246		2022-08-21 15:44:43	1.276	0.232	434.595
2022-08-16 12:58:36	2.104	0.618	413.701		2022-08-16 14:25:18	3.066	2.163	398.817		2022-08-21 15:44:44	1.256	0.232	434.165
2022-08-16 12:58:37	2.104	0.616	413.128		2022-08-16 14:25:19	3.026	2.21	400.678		2022-08-21 15:44:45	1.216	0.233	434.452
2022-08-16 12:58:38	2.091	0.618	413.557		2022-08-16 14:25:20	2.992	2.253	399.103		2022-08-21 15:44:46	1.216	0.232	434.738
2022-08-16 12:58:39	2.084	0.618	413.271		2022-08-16 14:25:21	2.972	2.258	398.388		2022-08-21 15:44:47	1.229	0.232	434.452
2022-08-16 12:58:40	2.084	0.619	413.557		2022-08-16 14:25:22	2.965	2.281	399.246		2022-08-21 15:44:48	1.196	0.232	434.165
2022-08-16 12:58:41	2.084	0.619	413.701		2022-08-16 14:25:23	2.965	2.283	398.245		2022-08-21 15:44:49	0.541	0.235	434.165
2022-08-16 12:58:42	2.077	0.618	413.701		2022-08-16 14:25:24	2.952	2.286	397.243		2022-08-21 15:44:50	0.608	0.232	434.309
2022-08-16 12:58:43	2.064	0.621	414.416		2022-08-16 14:25:25	2.945	2.295	397.243		2022-08-21 15:44:51	1.182	0.233	434.165
2022-08-16 12:58:44	2.064	0.619	413.844		2022-08-16 14:25:26	2.945	2.299	396.67		2022-08-21 15:44:52	0.574	0.233	434.309
2022-08-16 12:58:45	2.05	0.619	413.701		2022-08-16 14:25:27	2.952	2.299	396.957		2022-08-21 15:44:53	1.229	0.233	434.452
2022-08-16 12:58:46	2.05	0.622	413.987		2022-08-16 14:25:28	2.979	2.304	397.1		2022-08-21 15:44:54	1.289	0.233	434.595
2022-08-16 12:58:47	2.037	0.624	413.987		2022-08-16 14:25:29	3.019	2.302	396.957		2022-08-21 15:44:55	1.249	0.232	434.452
2022-08-16 12:58:48	2.037	0.622	414.13		2022-08-16 14:25:30	3.039	2.308	396.957		2022-08-21 15:44:56	0.561	0.232	434.881
2022-08-16 12:58:49	2.03	0.622	413.701		2022-08-16 14:25:31	3.092	2.311	396.957		2022-08-21 15:44:57	0.427	0.23	435.024
2022-08-16 12:58:50	2.01	0.624	413.987		2022-08-16 14:25:32	3.74	2.314	396.957		2022-08-21 15:44:58	0.341	0.229	434.595
2022-08-16 12:58:51	2.01	0.625	413.701		2022-08-16 14:25:33	3.807	2.317	396.527		2022-08-21 15:44:59	0.301	0.23	435.167
2022-08-16 12:58:52	2.004	0.624	414.416		2022-08-16 14:25:34	3.82	2.321	396.527		2022-08-21 15:45:00	0.287	0.229	434.595
2022-08-16 12:58:53	1.99	0.627	414.13		2022-08-16 14:25:35	3.827	2.324	396.527		2022-08-21 15:45:01	0.327	0.23	435.167
2022-08-16 12:58:54	1.977	0.628	413.701		2022-08-16 14:25:36	3.854	2.326	396.527		2022-08-21 15:45:02	0.454	0.229	434.738
2022-08-16 12:58:55	1.957	0.625	414.13		2022-08-16 14:25:37	4.475	2.327	396.957		2022-08-21 15:45:03	0.434	0.229	435.024
2022-08-16 12:58:56	1.964	0.627	414.273		2022-08-16 14:25:38	4.755	2.329	396.814		2022-08-21 15:45:04	0.367	0.229	435.167
2022-08-16 12:58:57	1.917	0.627	414.559		2022-08-16 14:25:39	5.57	2.336	396.814		2022-08-21 15:45:05	0.341	0.227	434.452
2022-08-16 12:58:58	1.897	0.625	414.559		2022-08-16 14:25:40	6.399	2.345	397.386		2022-08-21 15:45:06	0.494	0.224	435.024
2022-08-16 12:58:59	1.81	0.625	414.559		2022-08-16 14:25:41	8.015	2.428	397.243		2022-08-21 15:45:07	1.216	0.224	435.167
2022-08-16 12:59:00	1.456	0.627	414.416		2022-08-16 14:25:42	8.796	2.471	398.245		2022-08-21 15:45:08	1.236	0.226	435.31
2022-08-16 12:59:01	1.416	0.624	414.559		2022-08-16 14:25:43	9.003	2.492	398.388		2022-08-21 15:45:09	0.561	0.227	435.024
2022-08-16 12:59:02	1.389	0.625	414.845		2022-08-16 14:25:44	9.832	2.506	397.958		2022-08-21 15:45:10	0.548	0.226	435.024
2022-08-16 12:59:03	1.409	0.627	415.275		2022-08-16 14:25:45	10.473	2.515	398.245		2022-08-21 15:45:11	1.229	0.227	435.167
2022-08-16 12:59:04	1.383	0.624	415.132		2022-08-16 14:25:46	10.226	2.525	399.533		2022-08-21 15:45:12	1.282	0.227	435.024
2022-08-16 12:59:05	1.383	0.625	414.845		2022-08-16 14:25:47	9.892	2.538	399.39		2022-08-21 15:45:13	1.302	0.229	435.024
2022-08-16 12:59:06	1.369	0.624	414.416		2022-08-16 14:25:48	9.798	2.623	408.835		2022-08-21 15:45:14	1.309	0.23	434.595
2022-08-16 12:59:07	1.369	0.622	414.845		2022-08-16 14:25:49	8.917	2.67	404.398		2022-08-21 15:45:15	1.296	0.23	435.167
2022-08-16 12:59:08	1.369	0.624	415.132		2022-08-16 14:25:50	7.935	2.681	411.983		2022-08-21 15:45:16	1.296	0.232	434.309
2022-08-16 12:59:09	1.356	0.624	414.989		2022-08-16 14:25:51	6.432	2.687	411.697		2022-08-21 15:45:17	1.316	0.233	435.024
2022-08-16 12:59:10	1.356	0.625	414.845		2022-08-16 14:25:52	6.258	2.685	411.697		2022-08-21 15:45:18	1.363	0.232	433.879
2022-08-16 12:59:11	1.356	0.627	414.845		2022-08-16 14:25:53	5.544	2.685	411.84		2022-08-21 15:45:19	1.416	0.236	434.452
2022-08-16 12:59:12	1.342	0.627	414.845		2022-08-16 14:25:54	5.337	2.682	411.983		2022-08-21 15:45:20	1.336	0.236	434.452
2022-08-16 12:59:13	1.342	0.624	414.845		2022-08-16 14:25:55	4.689	2.676	412.126		2022-08-21 15:45:21	1.209	0.236	434.595
2022-08-16 12:59:14	1.349	0.625	415.275		2022-08-16 14:25:56	3.994	2.659	407.976		2022-08-21 15:45:22	0.501	0.239	434.452
2022-08-16 12:59:15	1.336	0.625	415.275		2022-08-16 14:25:57	3.827	2.608	412.556		2022-08-21 15:45:23	0.394	0.238	434.595
2022-08-16 12:59:16	1.336	0.625	415.275		2022-08-16 14:25:58	3.7	2.54	402.681		2022-08-21 15:45:24	0.341	0.235	434.452
2022-08-16 12:59:17	1.322	0.627	415.275		2022-08-16 14:25:59	3.039	2.531	401.107		2022-08-21 15:45:25	0.347	0.233	434.309
2022-08-16 12:59:18	1.329	0.631	415.275		2022-08-16 14:26:00	2.992	2.523	405.543		2022-08-21 15:45:26	0.441	0.233	434.452
2022-08-16 12:59:19	1.322	0.628	414.845		2022-08-16 14:26:01	2.965	2.519	409.837		2022-08-21 15:45:27	0.534	0.233	434.309
2022-08-16 12:59:20	1.322	0.63	414.702		2022-08-16 14:26:02	2.932	2.513	398.817		2022-08-21 15:45:28	1.189	0.233	435.024
2022-08-16 12:59:21	1.322	0.63	414.989		2022-08-16 14:26:03	2.892	2.51	405.83		2022-08-21 15:45:29	1.403	0.233	435.883
2022-08-16 12:59:22	1.316	0.63	414.845		2022-08-16 14:26:04	2.832	2.507	398.245		2022-08-21 15:45:30	1.329	0.233	435.597
2022-08-16 12:59:23	1.309	0.624	415.132		2022-08-16 14:26:05	2.318	2.5	397.672		2022-08-21 15:45:31	1.302	0.232	435.024
2022-08-16 12:59:24	1.302	0.625	414.845		2022-08-16 14:26:06	2.237	2.492	397.815		2022-08-21 15:45:32	1.282	0.235	434.881
2022-08-16 12:59:25	1.302	0.627	415.132		2022-08-16 14:26:07	2.204	2.48	397.815		2022-08-21 15:45:33	1.316	0.232	435.167
2022-08-16 12:59:26	1.302	0.628	414.845		2022-08-16 14:26:08	2.191	2.463	397.672		2022-08-21 15:45:34	1.276	0.235	435.597
2022-08-16 12:59:27	1.296	0.627	415.704		2022-08-16 14:26:09	2.171	2.446	398.245		2022-08-21 15:45:35	1.196	0.235	435.167
2022-08-16 12:59:28	1.282	0.63	415.561		2022-08-16 14:26:10	2.171	2.357	397.815		2022-08-21 15:45:36	0.508	0.236	435.167
2022-08-16 12:59:29	1.289	0.628	416.133		2022-08-16 14:26:11	2.164	2.344	397.958		2022-08-21 15:45:37	0.374	0.236	435.31
2022-08-16 12:59:30	1.289	0.628	416.133		2022-08-16 14:26:12	2.164	2.336	397.243		2022-08-21 15:45:38	0.427	0.233	435.167
2022-08-16 12:59:31	1.289	0.625	416.849		2022-08-16 14:26:13	2.157	2.333	397.243		2022-08-21 15:45:39	0.528	0.233	435.597
2022-08-16 12:59:32	1.289	0.625	416.42		2022-08-16 14:26:14	2.151	2.33	397.815		2022-08-21 15:45:40	0.474	0.232	435.74
2022-08-16 12:59:33	1.282	0.627	417.421		2022-08-16 14:26:15	2.151	2.326	397.386		2022-08-21 15:45:41	0.381	0.232	434.881
2022-08-16 12:59:34	1.276	0.625	416.706		2022-08-16 14:26:16	2.137	2.326	397.243		2022-08-21 15:45:42	0.407	0.23	435.024
2022-08-16 12:59:35	1.276	0.625	417.994		2022-08-16 14:26:17	2.137	2.321	397.243		2022-08-21 15:45:43	0.494	0.23	435.024
2022-08-16 12:59:36	1.276	0.622	418.423		2022-08-16 14:26:18	2.131	2.317	397.386		2022-08-21 15:45:44	0.521	0.23	434.881
2022-08-16 12:59:37	1.269	0.622	419.997		2022-08-16 14:26:19	2.124	2.315	397.243		2022-08-21 15:45:45	0.528	0.23	434.595
2022-08-16 12:59:38	1.269	0.624	430.445		2022-08-16 14:26:20	2.124	2.31	397.386		2022-08-21 15:45:46	0.421	0.229	434.595
2022-08-16 12:59:39	1.262	0.625	430.015		2022-08-16 14:26:21	2.117	2.307	397.243		2022-08-21 15:45:47	0.334	0.229	434.595
2022-08-16 12:59:40	1.269	0.624	431.017		2022-08-16 14:26:22	2.111	2.302	397.1		2022-08-21 15:45:48	0.287	0.23	434.165
2022-08-16 12:59:41	1.269	0.622	431.017		2022-08-16 14:26:23	2.104	2.293	397.815		2022-08-21 15:45:49	0.26	0.23	433.879
2022-08-16 12:59:42	1.262	0.622	431.303		2022-08-16 14:26:24	2.104	2.28	397.672		2022-08-21 15:45:50	0.254	0.229	434.165
2022-08-16 12:59:43	1.262	0.622	432.162		2022-08-16 14:26:25	2.097	2.278	397.529		2022-08-21 15:45:51	0.334	0.227	434.022
2022-08-16 12:59:44	1.269	0.624	432.019		2022-08-16 14:26:26	2.097	2.266	397.815		2022-08-21 15:45:52	0.327	0.227	433.879
2022-08-16 12:59:45	1.262	0.622	432.448		2022-08-16 14:26:27	2.111	2.262	397.386		2022-08-21 15:45:53	0.281	0.226	433.879
2022-08-16 12:59:46	1.262	0.619	432.734		2022-08-16 14:26:28	2.244	2.261	397.243		2022-08-21 15:45:54	0.26	0.227	434.165
2022-08-16 12:59:47	1.256	0.622	432.734		2022-08-16 14:26:29	3.547	2.264	397.1		2022-08-21 15:45:55	0.24	0.224	434.165
2022-08-16 12:59:48	1.262	0.619	432.162							2022-08-21 15:45:56	0.274	0.224	434.022
2022-08-16 12:59:49	1.256	0.621	432.448							2022-08-21 15:45:57	0.501	0.223	433.593
2022-08-16 12:59:50	1.256	0.618	432.591							2022-08-21 15:45:58	1.236	0.224	434.022
2022-08-16 12:59:51	1.256	0.618	433.164							2022-08-21 15:45:59	1.202	0.224	433.736
2022-08-16 12:59:52	1.249	0.616	433.45							2022-08-21 15:46:00	0.508	0.227	434.309
2022-08-16 12:59:53	1.249	0.616	433.879							2022-08-21 15:46:01	0.367	0.226	434.022
2022-08-16 12:59:54	1.249	0.618	433.879							2022-08-21 15:46:02	0.301	0.227	434.022
2022-08-16 12:59:55	1.242	0.618	433.879							2022-08-21 15:46:03	0.26	0.227	434.165
2022-08-16 12:59:56	1.249	0.615	434.165							2022-08-21 15:46:04	0.24	0.226	434.165
2022-08-16 12:59:57	1.236	0.616	433.879							2022-08-21 15:46:05	0.22	0.226	433.879
2022-08-16 12:59:58	1.242	0.616	433.879							2022-08-21 15:46:06	0.214	0.226	433.45
2022-08-16 12:59:59	1.242	0.613	432.591							2022-08-21 15:46:07	0.207	0.223	434.165
2022-08-16 13:00:00	1.236	0.613	432.162							2022-08-21 15:46:08	0.214	0.226	433.45
2022-08-16 13:00:01	1.229	0.615	431.876							2022-08-21 15:46:09	0.347	0.224	433.593
2022-08-16 13:00:02	1.236	0.613	432.305							2022-08-21 15:46:10	0.434	0.223	433.593
2022-08-16 13:00:03	1.236	0.615	432.734							2022-08-21 15:46:11	0.367	0.224	433.736
2022-08-16 13:00:04	1.229	0.613	432.019							2022-08-21 15:46:12	0.508	0.226	433.736
2022-08-16 13:00:05	1.229	0.613	434.452							2022-08-21 15:46:13	0.574	0.226	434.165
2022-08-16 13:00:06	1.222	0.613	434.738							2022-08-21 15:46:14	1.149	0.224	433.593
2022-08-16 13:00:07	1.216	0.615	437.886							2022-08-21 15:46:15	1.155	0.224	433.879
2022-08-16 13:00:08	1.222	0.613	435.024							2022-08-21 15:46:16	1.169	0.226	433.879
2022-08-16 13:00:09	1.222	0.612	435.31							2022-08-21 15:46:17	0.541	0.229	434.022
2022-08-16 13:00:10	1.222	0.612	433.879							2022-08-21 15:46:18	0.447	0.227	433.736
2022-08-16 13:00:11	1.216	0.61	435.31							2022-08-21 15:46:19	1.189	0.227	433.593
2022-08-16 13:00:12	1.209	0.609	435.167							2022-08-21 15:46:20	1.229	0.227	434.022
2022-08-16 13:00:13	1.216	0.61	439.031							2022-08-21 15:46:21	0.574	0.229	434.022
2022-08-16 13:00:14	1.209	0.607	439.604							2022-08-21 15:46:22	0.554	0.229	434.022
2022-08-16 13:00:15	1.202	0.607	441.321							2022-08-21 15:46:23	0.508	0.227	434.022
2022-08-16 13:00:16	1.216	0.609	442.752							2022-08-21 15:46:24	0.488	0.226	434.165
2022-08-16 13:00:17	1.202	0.61	446.473							2022-08-21 15:46:25	0.421	0.229	434.452
2022-08-16 13:00:18	1.209	0.609	445.185							2022-08-21 15:46:26	0.327	0.227	434.452
2022-08-16 13:00:19	1.202	0.609	444.899							2022-08-21 15:46:27	0.281	0.227	434.309
2022-08-16 13:00:20	1.202	0.609	455.203							2022-08-21 15:46:28	0.247	0.227	434.452
2022-08-16 13:00:21	1.202	0.607	438.029							2022-08-21 15:46:29	0.234	0.224	434.309
2022-08-16 13:00:22	1.202	0.606	438.173							2022-08-21 15:46:30	0.247	0.221	434.022
2022-08-16 13:00:23	1.202	0.606	434.309							2022-08-21 15:46:31	0.294	0.221	434.452
2022-08-16 13:00:24	1.209	0.604	434.595							2022-08-21 15:46:32	0.307	0.221	434.309
2022-08-16 13:00:25	1.196	0.603	434.595							2022-08-21 15:46:33	0.301	0.223	434.309
2022-08-16 13:00:26	1.196	0.602	435.31							2022-08-21 15:46:34	0.281	0.221	434.595
2022-08-16 13:00:27	1.196	0.599	433.307							2022-08-21 15:46:35	0.247	0.221	434.165
2022-08-16 13:00:28	1.196	0.6	433.45							2022-08-21 15:46:36	0.227	0.218	433.879
2022-08-16 13:00:29	1.189	0.602	432.162							2022-08-21 15:46:37	0.214	0.217	433.879
2022-08-16 13:00:30	1.196	0.6	431.876							2022-08-21 15:46:38	0.207	0.217	434.022
2022-08-16 13:00:31	1.182	0.603	430.301							2022-08-21 15:46:39	0.214	0.217	433.879
2022-08-16 13:00:32	1.189	0.603	418.28							2022-08-21 15:46:40	0.207	0.214	434.165
2022-08-16 13:00:33	1.189	0.604	418.709							2022-08-21 15:46:41	0.2	0.212	433.879
2022-08-16 13:00:34	1.176	0.604	415.99							2022-08-21 15:46:42	0.254	0.215	434.165
2022-08-16 13:00:35	1.176	0.604	415.704							2022-08-21 15:46:43	0.327	0.214	434.595
2022-08-16 13:00:36	1.176	0.603	415.275							2022-08-21 15:46:44	0.314	0.214	433.593
2022-08-16 13:00:37	1.176	0.604	414.845							2022-08-21 15:46:45	0.274	0.214	433.593
2022-08-16 13:00:38	1.169	0.604	414.13							2022-08-21 15:46:46	0.247	0.214	433.593
2022-08-16 13:00:39	1.155	0.604	414.13							2022-08-21 15:46:47	0.414	0.211	433.593
2022-08-16 13:00:40	1.149	0.604	414.13							2022-08-21 15:46:48	0.501	0.215	433.736
2022-08-16 13:00:41	1.149	0.603	414.13							2022-08-21 15:46:49	0.561	0.217	434.022
2022-08-16 13:00:42	1.149	0.603	414.273							2022-08-21 15:46:50	0.514	0.217	433.45
2022-08-16 13:00:43	1.149	0.602	413.987							2022-08-21 15:46:51	0.414	0.218	433.307
2022-08-16 13:00:44	1.155	0.603	414.273							2022-08-21 15:46:52	0.334	0.217	433.593
2022-08-16 13:00:45	1.142	0.602	414.13							2022-08-21 15:46:53	0.281	0.218	433.736
2022-08-16 13:00:46	1.155	0.603	414.273							2022-08-21 15:46:54	0.281	0.218	433.593
2022-08-16 13:00:47	1.135	0.602	414.13							2022-08-21 15:46:55	0.441	0.217	433.593
2022-08-16 13:00:48	1.142	0.603	414.13							2022-08-21 15:46:56	0.528	0.22	433.593
2022-08-16 13:00:49	1.155	0.603	414.13							2022-08-21 15:46:57	0.508	0.218	434.022
2022-08-16 13:00:50	1.135	0.602	414.13							2022-08-21 15:46:58	0.407	0.218	434.165
2022-08-16 13:00:51	1.135	0.602	413.844							2022-08-21 15:46:59	0.461	0.217	433.879
2022-08-16 13:00:52	1.155	0.602	414.273							2022-08-21 15:47:00	1.155	0.217	433.879
2022-08-16 13:00:53	1.149	0.599	413.987							2022-08-21 15:47:01	0.568	0.22	433.879
2022-08-16 13:00:54	1.142	0.596	414.273							2022-08-21 15:47:02	0.488	0.221	434.165
2022-08-16 13:00:55	1.142	0.594	414.273							2022-08-21 15:47:03	0.401	0.218	434.022
2022-08-16 13:00:56	1.149	0.593	414.559							2022-08-21 15:47:04	0.347	0.218	434.165
2022-08-16 13:00:57	1.122	0.59	414.702							2022-08-21 15:47:05	0.334	0.218	433.879
2022-08-16 13:00:58	1.129	0.588	414.559							2022-08-21 15:47:06	0.334	0.217	434.022
2022-08-16 13:00:59	1.095	0.588	414.559							2022-08-21 15:47:07	0.488	0.218	433.736
2022-08-16 13:01:00	1.095	0.587	414.702							2022-08-21 15:47:08	1.269	0.218	434.022
2022-08-16 13:01:01	1.062	0.584	414.416							2022-08-21 15:47:09	1.342	0.218	434.022
2022-08-16 13:01:02	1.055	0.581	414.702							2022-08-21 15:47:10	1.322	0.221	434.165
2022-08-16 13:01:03	1.055	0.582	414.559							2022-08-21 15:47:11	1.236	0.223	434.595
2022-08-16 13:01:04	1.029	0.582	414.559							2022-08-21 15:47:12	1.162	0.224	434.452
2022-08-16 13:01:05	0.922	0.578	414.273							2022-08-21 15:47:13	1.222	0.227	434.165
2022-08-16 13:01:06	0.995	0.572	414.845							2022-08-21 15:47:14	1.222	0.224	434.022
2022-08-16 13:01:07	0.988	0.57	414.702							2022-08-21 15:47:15	1.189	0.226	434.595
2022-08-16 13:01:08	1.002	0.564	414.559							2022-08-21 15:47:16	1.169	0.226	434.452
2022-08-16 13:01:09	0.908	0.563	414.702							2022-08-21 15:47:17	0.561	0.227	434.165
2022-08-16 13:01:10	0.614	0.558	414.989							2022-08-21 15:47:18	0.514	0.227	434.022
2022-08-16 13:01:11	0.614	0.557	414.702							2022-08-21 15:47:19	0.401	0.226	433.593
2022-08-16 13:01:12	0.601	0.533	414.559							2022-08-21 15:47:20	0.367	0.224	433.736
2022-08-16 13:01:13	0.728	0.538	414.416							2022-08-21 15:47:21	0.514	0.224	434.881
2022-08-16 13:01:14	0.581	0.45	414.702							2022-08-21 15:47:22	1.229	0.221	435.024
2022-08-16 13:01:15	0.534	0.446	414.559							2022-08-21 15:47:23	1.176	0.223	434.881
2022-08-16 13:01:16	0.541	0.441	414.416							2022-08-21 15:47:24	1.216	0.223	435.024
2022-08-16 13:01:17	0.548	0.444	414.416							2022-08-21 15:47:25	0.548	0.223	435.024
2022-08-16 13:01:18	0.541	0.443	414.559							2022-08-21 15:47:26	0.414	0.22	434.309
2022-08-16 13:01:19	0.528	0.438	414.559							2022-08-21 15:47:27	0.327	0.22	435.31
2022-08-16 13:01:20	0.521	0.441	414.416							2022-08-21 15:47:28	0.347	0.217	434.595
2022-08-16 13:01:21	0.514	0.443	414.989							2022-08-21 15:47:29	0.394	0.218	434.452
2022-08-16 13:01:22	0.528	0.443	414.845							2022-08-21 15:47:30	0.347	0.215	434.595
2022-08-16 13:01:23	0.528	0.44	415.132							2022-08-21 15:47:31	0.327	0.215	434.022
2022-08-16 13:01:24	0.534	0.441	414.845							2022-08-21 15:47:32	0.321	0.217	434.452
2022-08-16 13:01:25	0.514	0.44	414.845							2022-08-21 15:47:33	0.301	0.215	434.309
2022-08-16 13:01:26	0.521	0.44	414.845							2022-08-21 15:47:34	0.321	0.214	434.452
2022-08-16 13:01:27	0.521	0.44	414.989							2022-08-21 15:47:35	0.321	0.214	434.309
2022-08-16 13:01:28	0.528	0.438	415.132							2022-08-21 15:47:36	0.281	0.212	434.738
2022-08-16 13:01:29	0.534	0.438	415.132							2022-08-21 15:47:37	0.26	0.214	433.879
2022-08-16 13:01:30	0.528	0.438	415.132							2022-08-21 15:47:38	0.287	0.215	434.022
2022-08-16 13:01:31	0.528	0.437	415.561							2022-08-21 15:47:39	0.394	0.214	433.879
2022-08-16 13:01:32	0.534	0.434	415.275							2022-08-21 15:47:40	0.441	0.214	434.309
2022-08-16 13:01:33	0.521	0.438	415.561							2022-08-21 15:47:41	0.347	0.212	433.593
2022-08-16 13:01:34	0.514	0.434	415.847							2022-08-21 15:47:42	0.287	0.211	433.593
2022-08-16 13:01:35	0.514	0.434	415.704							2022-08-21 15:47:43	0.307	0.214	433.45
2022-08-16 13:01:36	0.521	0.429	415.704							2022-08-21 15:47:44	0.494	0.211	433.736
2022-08-16 13:01:37	0.514	0.429	415.561							2022-08-21 15:47:45	0.468	0.214	433.879
2022-08-16 13:01:38	0.514	0.428	415.704							2022-08-21 15:47:46	0.414	0.214	433.736
2022-08-16 13:01:39	0.528	0.431	415.99							2022-08-21 15:47:47	0.394	0.212	433.45
2022-08-16 13:01:40	0.508	0.428	416.42							2022-08-21 15:47:48	0.468	0.212	434.022
2022-08-16 13:01:41	0.521	0.429	416.849							2022-08-21 15:47:49	0.508	0.214	433.879
2022-08-16 13:01:42	0.514	0.429	416.42							2022-08-21 15:47:50	0.427	0.217	433.879
2022-08-16 13:01:43	0.494	0.431	416.563							2022-08-21 15:47:51	0.454	0.214	434.309
2022-08-16 13:01:44	0.494	0.431	416.42							2022-08-21 15:47:52	0.508	0.214	434.309
2022-08-16 13:01:45	0.508	0.429	416.563							2022-08-21 15:47:53	0.407	0.215	434.165
2022-08-16 13:01:46	0.488	0.429	416.706							2022-08-21 15:47:54	0.374	0.215	434.309
2022-08-16 13:01:47	0.488	0.428	416.706							2022-08-21 15:47:55	0.494	0.215	434.595
2022-08-16 13:01:48	0.494	0.426	416.563							2022-08-21 15:47:56	0.548	0.215	434.309
2022-08-16 13:01:49	0.488	0.426	416.42							2022-08-21 15:47:57	0.541	0.215	434.452
2022-08-16 13:01:50	0.488	0.425	416.706							2022-08-21 15:47:58	0.461	0.217	434.309
2022-08-16 13:01:51	0.488	0.425	417.421							2022-08-21 15:47:59	0.474	0.215	434.595
2022-08-16 13:01:52	0.488	0.425	416.992							2022-08-21 15:48:00	0.394	0.215	434.309
2022-08-16 13:01:53	0.494	0.422	416.563							2022-08-21 15:48:01	0.327	0.217	434.595
2022-08-16 13:01:54	0.501	0.422	416.563							2022-08-21 15:48:02	0.334	0.215	434.595
2022-08-16 13:01:55	0.514	0.422	416.42							2022-08-21 15:48:03	0.321	0.215	434.022
2022-08-16 13:01:56	0.494	0.425	416.706							2022-08-21 15:48:04	0.281	0.212	433.879
2022-08-16 13:01:57	0.494	0.425	416.277							2022-08-21 15:48:05	0.361	0.214	434.309
2022-08-16 13:01:58	0.474	0.425	416.277							2022-08-21 15:48:06	0.588	0.212	434.595
2022-08-16 13:01:59	0.488	0.423	415.99							2022-08-21 15:48:07	0.548	0.212	434.595
2022-08-16 13:02:00	0.481	0.425	415.99							2022-08-21 15:48:08	0.421	0.212	433.879
2022-08-16 13:02:01	0.488	0.425	415.704							2022-08-21 15:48:09	0.334	0.214	434.165
2022-08-16 13:02:02	0.481	0.423	415.561							2022-08-21 15:48:10	0.407	0.215	434.309
2022-08-16 13:02:03	0.494	0.425	415.132							2022-08-21 15:48:11	0.528	0.215	433.879
2022-08-16 13:02:04	0.514	0.425	415.275							2022-08-21 15:48:12	0.434	0.215	434.022
2022-08-16 13:02:05	0.494	0.425	415.275							2022-08-21 15:48:13	0.334	0.214	434.165
2022-08-16 13:02:06	0.514	0.423	414.845							2022-08-21 15:48:14	0.287	0.212	433.593
2022-08-16 13:02:07	0.514	0.422	414.702							2022-08-21 15:48:15	0.387	0.211	434.022
2022-08-16 13:02:08	0.514	0.422	414.702							2022-08-21 15:48:16	0.588	0.212	433.879
2022-08-16 13:02:09	0.508	0.42	414.845							2022-08-21 15:48:17	1.196	0.214	433.45
2022-08-16 13:02:10	0.508	0.42	414.559							2022-08-21 15:48:18	0.508	0.215	434.022
2022-08-16 13:02:11	0.508	0.417	414.273							2022-08-21 15:48:19	0.374	0.217	433.879
2022-08-16 13:02:12	0.501	0.419	414.559							2022-08-21 15:48:20	0.301	0.218	434.165
2022-08-16 13:02:13	0.494	0.417	414.416							2022-08-21 15:48:21	0.401	0.215	434.022
2022-08-16 13:02:14	0.494	0.416	414.416							2022-08-21 15:48:22	1.182	0.217	434.165
2022-08-16 13:02:15	0.488	0.417	414.273							2022-08-21 15:48:23	1.169	0.214	434.022
2022-08-16 13:02:16	0.481	0.414	414.273							2022-08-21 15:48:24	0.568	0.217	433.593
2022-08-16 13:02:17	0.481	0.414	414.13							2022-08-21 15:48:25	0.521	0.217	433.879
2022-08-16 13:02:18	0.488	0.413	414.273							2022-08-21 15:48:26	0.528	0.218	434.022
2022-08-16 13:02:19	0.481	0.414	414.273							2022-08-21 15:48:27	0.561	0.215	434.022
2022-08-16 13:02:20	0.474	0.414	414.13							2022-08-21 15:48:28	0.494	0.215	434.165
2022-08-16 13:02:21	0.481	0.414	413.987							2022-08-21 15:48:29	0.407	0.217	434.309
2022-08-16 13:02:22	0.488	0.413	414.273							2022-08-21 15:48:30	0.361	0.215	434.022
2022-08-16 13:02:23	0.488	0.411	413.701							2022-08-21 15:48:31	0.387	0.215	434.022
2022-08-16 13:02:24	0.488	0.411	414.416							2022-08-21 15:48:32	0.407	0.217	434.165
2022-08-16 13:02:25	0.488	0.411	414.13							2022-08-21 15:48:33	0.374	0.218	434.165
2022-08-16 13:02:26	0.481	0.413	414.416							2022-08-21 15:48:34	0.347	0.217	434.165
2022-08-16 13:02:27	0.494	0.413	414.273							2022-08-21 15:48:35	0.514	0.214	433.879
2022-08-16 13:02:28	0.508	0.414	414.273							2022-08-21 15:48:36	0.561	0.217	434.022
2022-08-16 13:02:29	0.508	0.414	413.987							2022-08-21 15:48:37	1.155	0.218	434.452
2022-08-16 13:02:30	0.501	0.413	414.273							2022-08-21 15:48:38	1.209	0.214	433.879
2022-08-16 13:02:31	0.501	0.414	414.13							2022-08-21 15:48:39	1.282	0.217	434.309
2022-08-16 13:02:32	0.488	0.411	414.416							2022-08-21 15:48:40	1.276	0.217	434.022
2022-08-16 13:02:33	0.468	0.411	414.702							2022-08-21 15:48:41	0.588	0.218	434.738
2022-08-16 13:02:34	0.468	0.411	414.13							2022-08-21 15:48:42	0.461	0.22	434.881
2022-08-16 13:02:35	0.461	0.411	413.844							2022-08-21 15:48:43	0.361	0.217	434.595
2022-08-16 13:02:36	0.454	0.413	413.987							2022-08-21 15:48:44	0.334	0.217	434.165
2022-08-16 13:02:37	0.468	0.411	414.273							2022-08-21 15:48:45	0.294	0.217	434.452
2022-08-16 13:02:38	0.454	0.408	414.416							2022-08-21 15:48:46	0.26	0.215	434.595
2022-08-16 13:02:39	0.441	0.408	414.273							2022-08-21 15:48:47	0.274	0.214	434.022
2022-08-16 13:02:40	0.447	0.407	414.273							2022-08-21 15:48:48	0.307	0.214	434.022
2022-08-16 13:02:41	0.447	0.405	413.987							2022-08-21 15:48:49	0.327	0.215	434.022
2022-08-16 13:02:42	0.461	0.401	414.13							2022-08-21 15:48:50	0.381	0.214	434.309
2022-08-16 13:02:43	0.474	0.401	414.273							2022-08-21 15:48:51	0.461	0.214	434.165
2022-08-16 13:02:44	0.474	0.398	414.416							2022-08-21 15:48:52	1.182	0.214	434.595
2022-08-16 13:02:45	0.481	0.4	414.559							2022-08-21 15:48:53	1.209	0.215	434.595
2022-08-16 13:02:46	0.481	0.397	414.416							2022-08-21 15:48:54	1.202	0.215	434.595
2022-08-16 13:02:47	0.494	0.391	414.845							2022-08-21 15:48:55	0.594	0.214	434.165
2022-08-16 13:02:48	0.494	0.389	414.845							2022-08-21 15:48:56	0.528	0.217	434.452
2022-08-16 13:02:49	0.508	0.377	415.275							2022-08-21 15:48:57	0.514	0.218	434.595
2022-08-16 13:02:50	0.508	0.376	415.704							2022-08-21 15:48:58	0.594	0.22	434.595
2022-08-16 13:02:51	0.508	0.374	415.704							2022-08-21 15:48:59	1.262	0.22	434.022
2022-08-16 13:02:52	0.508	0.377	415.418							2022-08-21 15:49:00	1.202	0.22	434.022
2022-08-16 13:02:53	0.514	0.383	415.847							2022-08-21 15:49:01	0.508	0.221	434.165
2022-08-16 13:02:54	0.521	0.391	415.847							2022-08-21 15:49:02	0.374	0.218	434.165
2022-08-16 13:02:55	0.521	0.391	415.847							2022-08-21 15:49:03	0.307	0.218	434.452
2022-08-16 13:02:56	0.514	0.389	415.847							2022-08-21 15:49:04	0.307	0.215	434.165
2022-08-16 13:02:57	0.508	0.386	415.418							2022-08-21 15:49:05	0.381	0.217	434.165
2022-08-16 13:02:58	0.501	0.382	415.847							2022-08-21 15:49:06	0.427	0.215	434.165
2022-08-16 13:02:59	0.494	0.385	415.847							2022-08-21 15:49:07	0.441	0.217	434.022
2022-08-16 13:03:00	0.494	0.388	415.847							2022-08-21 15:49:08	0.401	0.215	434.452
2022-08-16 13:03:01	0.942	0.382	415.418							2022-08-21 15:49:09	0.407	0.217	434.165
2022-08-16 13:03:02	1.256	0.382	415.418							2022-08-21 15:49:10	0.528	0.217	434.022
2022-08-16 13:03:03	1.363	0.376	415.418							2022-08-21 15:49:11	1.196	0.217	433.879
2022-08-16 13:03:04	1.964	0.386	415.418							2022-08-21 15:49:12	1.196	0.217	433.593
2022-08-16 13:03:05	1.416	0.391	415.275							2022-08-21 15:49:13	0.581	0.217	434.309
2022-08-16 13:03:06	1.296	0.391	414.845							2022-08-21 15:49:14	0.454	0.217	434.452
2022-08-16 13:03:07	1.236	0.391	414.989							2022-08-21 15:49:15	0.434	0.215	433.879
2022-08-16 13:03:08	1.196	0.394	414.559							2022-08-21 15:49:16	1.162	0.217	433.736
2022-08-16 13:03:09	1.196	0.395	414.559							2022-08-21 15:49:17	1.262	0.218	433.879
2022-08-16 13:03:10	1.202	0.395	414.559							2022-08-21 15:49:18	1.229	0.217	433.879
2022-08-16 13:03:11	1.189	0.395	414.13							2022-08-21 15:49:19	0.541	0.22	433.736
2022-08-16 13:03:12	1.155	0.395	414.416							2022-08-21 15:49:20	0.441	0.217	433.879
2022-08-16 13:03:13	1.089	0.395	414.559							2022-08-21 15:49:21	0.407	0.218	433.879
2022-08-16 13:03:14	0.915	0.392	414.559							2022-08-21 15:49:22	0.347	0.217	434.022
2022-08-16 13:03:15	0.581	0.389	414.273							2022-08-21 15:49:23	0.294	0.214	433.736
2022-08-16 13:03:16	0.614	0.392	414.559							2022-08-21 15:49:24	0.254	0.214	434.309
2022-08-16 13:03:17	1.029	0.386	414.273							2022-08-21 15:49:25	0.24	0.211	434.165
2022-08-16 13:03:18	1.102	0.385	414.416							2022-08-21 15:49:26	0.24	0.211	434.738
2022-08-16 13:03:19	1.149	0.388	414.13							2022-08-21 15:49:27	0.301	0.212	434.022
2022-08-16 13:03:20	1.176	0.386	414.273							2022-08-21 15:49:28	0.287	0.212	434.022
2022-08-16 13:03:21	1.189	0.386	413.844							2022-08-21 15:49:29	0.254	0.211	434.165
2022-08-16 13:03:22	1.189	0.38	414.273							2022-08-21 15:49:30	0.374	0.211	434.452
2022-08-16 13:03:23	1.176	0.373	414.273							2022-08-21 15:49:31	1.189	0.212	434.452
2022-08-16 13:03:24	1.189	0.373	414.13							2022-08-21 15:49:32	1.242	0.211	434.165
2022-08-16 13:03:25	1.269	0.351	414.416							2022-08-21 15:49:33	1.256	0.212	434.595
2022-08-16 13:03:26	2.144	0.368	414.702							2022-08-21 15:49:34	1.209	0.212	434.309
2022-08-16 13:03:27	3.039	0.383	414.559							2022-08-21 15:49:35	0.574	0.214	434.165
2022-08-16 13:03:28	3.807	0.389	414.559							2022-08-21 15:49:36	0.541	0.215	434.738
2022-08-16 13:03:29	3.847	0.398	414.416							2022-08-21 15:49:37	0.554	0.215	435.453
2022-08-16 13:03:30	3.8	0.405	414.559							2022-08-21 15:49:38	0.594	0.215	435.167
2022-08-16 13:03:31	3.132	0.408	414.416							2022-08-21 15:49:39	0.508	0.215	435.024
2022-08-16 13:03:32	3.106	0.41	414.845							2022-08-21 15:49:40	0.594	0.214	434.738
2022-08-16 13:03:33	3.86	0.414	415.418							2022-08-21 15:49:41	0.601	0.218	434.452
2022-08-16 13:03:34	5.65	0.417	415.275							2022-08-21 15:49:42	0.488	0.22	434.881
2022-08-16 13:03:35	8.509	0.42	415.847							2022-08-21 15:49:43	0.374	0.217	434.595
2022-08-16 13:03:36	9.03	0.428	416.42							2022-08-21 15:49:44	0.307	0.214	434.452
2022-08-16 13:03:37	9.645	0.437	416.277							2022-08-21 15:49:45	0.327	0.215	434.881
2022-08-16 13:03:38	11.241	0.567	416.563							2022-08-21 15:49:46	0.447	0.217	434.595
2022-08-16 13:03:39	14.253	0.593	420.141							2022-08-21 15:49:47	1.189	0.215	434.738
2022-08-16 13:03:40	17.566	0.609	417.421							2022-08-21 15:49:48	1.189	0.217	435.453
2022-08-16 13:03:41	18.314	0.63	430.445							2022-08-21 15:49:49	0.541	0.217	435.167
2022-08-16 13:03:42	17.546	0.789	430.731							2022-08-21 15:49:50	0.568	0.214	434.309
2022-08-16 13:03:43	15.769	0.805	432.734							2022-08-21 15:49:51	1.222	0.214	434.022
2022-08-16 13:03:44	13.104	0.83	432.734							2022-08-21 15:49:52	1.155	0.214	434.165
2022-08-16 13:03:45	13.966	0.968	432.877							2022-08-21 15:49:53	1.269	0.217	434.309
2022-08-16 13:03:46	15.803	0.982	432.734							2022-08-21 15:49:54	1.269	0.217	434.452
2022-08-16 13:03:47	22.755	0.992	432.448							2022-08-21 15:49:55	1.242	0.218	435.597
2022-08-16 13:03:48	33.121	1.028	433.879							2022-08-21 15:49:56	0.541	0.217	434.738
2022-08-16 13:03:49	37.456	1.182	434.309							2022-08-21 15:49:57	0.414	0.217	434.595
2022-08-16 13:03:50	32.173	1.393	434.165							2022-08-21 15:49:58	0.314	0.217	434.881
2022-08-16 13:03:51	23.483	1.558	435.597							2022-08-21 15:49:59	0.267	0.215	434.881
2022-08-16 13:03:52	17.399	1.606	437.457							2022-08-21 15:50:00	0.247	0.212	435.453
2022-08-16 13:03:53	14.113	1.704	437.6							2022-08-21 15:50:01	0.227	0.211	434.738
2022-08-16 13:03:54	12.944	1.707	437.028							2022-08-21 15:50:02	0.22	0.209	434.738
2022-08-16 13:03:55	14.827	1.704	436.312							2022-08-21 15:50:03	0.214	0.208	435.167
2022-08-16 13:03:56	25.02	1.702	436.598							2022-08-21 15:50:04	0.214	0.208	435.024
2022-08-16 13:03:57	32.48	1.726	438.888							2022-08-21 15:50:05	0.207	0.208	434.595
2022-08-16 13:03:58	46.927	1.757	438.173							2022-08-21 15:50:06	0.207	0.206	434.165
2022-08-16 13:03:59	48.59	1.923	438.888							2022-08-21 15:50:07	0.207	0.085	433.879
2022-08-16 13:04:00	59.971	2.099	456.204							2022-08-21 15:50:08	0.2	0.086	433.593
2022-08-16 13:04:01	65.274	2.298	456.634							2022-08-21 15:50:09	0.2	0.076	433.593
2022-08-16 13:04:02	76.388	2.51	458.494							2022-08-21 15:50:10	0.2	0.074	433.593
2022-08-16 13:04:03	104.64	2.843	475.668							2022-08-21 15:50:11	0.2	0.073	433.879
2022-08-16 13:04:04	126.648	3.083	475.668							2022-08-21 15:50:12	0.194	0.073	433.736
2022-08-16 13:04:05	150.813	3.642	492.555							2022-08-21 15:50:13	0.2	0.071	433.736
2022-08-16 13:04:06	161.459	4.226	492.125							2022-08-21 15:50:14	0.187	0.071	433.879
2022-08-16 13:04:07	184.595	4.998	512.447							2022-08-21 15:50:15	0.194	0.071	433.164
2022-08-16 13:04:08	220.448	5.764	531.338							2022-08-21 15:50:16	0.194	0.068	433.164
2022-08-16 13:04:09	213.429	6.603	531.481							2022-08-21 15:50:17	0.187	0.071	433.164
2022-08-16 13:04:10	173.568	7.558	562.679							2022-08-21 15:50:18	0.187	0.07	433.021
2022-08-16 13:04:11	134.095	8.129	603.895							2022-08-21 15:50:19	0.187	0.07	433.021
2022-08-16 13:04:12	112.709	8.502	604.038							2022-08-21 15:50:20	0.18	0.067	433.164
2022-08-16 13:04:13	104.787	8.802	606.185							2022-08-21 15:50:21	0.187	0.068	433.307
2022-08-16 13:04:14	131.069	8.851	605.898							2022-08-21 15:50:22	0.187	0.067	433.736
2022-08-16 13:04:15	150.031	8.892	619.637							2022-08-21 15:50:23	0.187	0.067	433.736
2022-08-16 13:04:16	171.738	9.214	626.077							2022-08-21 15:50:24	0.187	0.067	433.593
2022-08-16 13:04:17	180.053	9.455	626.363							2022-08-21 15:50:25	0.18	0.065	434.165
2022-08-16 13:04:18	184.241	9.814	645.969							2022-08-21 15:50:26	0.18	0.065	433.593
2022-08-16 13:04:19	211.538	10.202	659.994							2022-08-21 15:50:27	0.174	0.065	433.593
2022-08-16 13:04:20	230.44	10.778	660.424							2022-08-21 15:50:28	0.18	0.065	433.593
2022-08-16 13:04:21	230.467	11.488	677.311							2022-08-21 15:50:29	0.174	0.065	433.593
2022-08-16 13:04:22	230.467	12.155	680.888							2022-08-21 15:50:30	0.174	0.065	433.736
2022-08-16 13:04:23	230.46	12.917	680.602							2022-08-21 15:50:31	0.18	0.064	433.879
2022-08-16 13:04:24	230.46	13.799	696.917							2022-08-21 15:50:32	0.174	0.062	434.165
2022-08-16 13:04:25	193.532	14.392	696.917							2022-08-21 15:50:33	0.18	0.062	434.165
2022-08-16 13:04:26	130.969	14.613	688.473							2022-08-21 15:50:34	0.18	0.062	434.022
2022-08-16 13:04:27	102.329	14.453	676.881							2022-08-21 15:50:35	0.174	0.062	434.022
2022-08-16 13:04:28	116.162	14.235	677.024							2022-08-21 15:50:36	0.174	0.061	434.165
2022-08-16 13:04:29	169.08	13.896	679.744							2022-08-21 15:50:37	0.174	0.059	434.022
2022-08-16 13:04:30	171.611	13.844	695.199							2022-08-21 15:50:38	0.174	0.061	434.165
2022-08-16 13:04:31	174.356	13.694	694.913							2022-08-21 15:50:39	0.174	0.059	434.165
2022-08-16 13:04:32	171.705	13.681	681.031							2022-08-21 15:50:40	0.174	0.059	434.022
2022-08-16 13:04:33	169.928	13.672	681.461							2022-08-21 15:50:41	0.174	0.059	433.736
2022-08-16 13:04:34	159.389	13.648	679.314							2022-08-21 15:50:42	0.174	0.059	433.45
2022-08-16 13:04:35	174.383	13.517	675.88							2022-08-21 15:50:43	0.174	0.059	433.164
2022-08-16 13:04:36	175.472	13.51	675.593							2022-08-21 15:50:44	0.18	0.058	433.736
2022-08-16 13:04:37	156.764	13.504	661.425							2022-08-21 15:50:45	0.167	0.056	433.736
2022-08-16 13:04:38	130.422	13.47	640.817							2022-08-21 15:50:46	0.167	0.058	433.593
2022-08-16 13:04:39	113.684	13.109	640.674							2022-08-21 15:50:47	0.167	0.056	433.879
2022-08-16 13:04:40	99.805	12.889	613.769							2022-08-21 15:50:48	0.167	0.056	433.879
2022-08-16 13:04:41	88.497	12.518	606.471							2022-08-21 15:50:49	0.174	0.055	433.736
2022-08-16 13:04:42	106.404	12.134	606.614							2022-08-21 15:50:50	0.167	0.056	434.022
2022-08-16 13:04:43	118.446	11.723	603.895							2022-08-21 15:50:51	0.167	0.055	434.165
2022-08-16 13:04:44	126.554	11.514	603.465							2022-08-21 15:50:52	0.167	0.053	433.593
2022-08-16 13:04:45	98.095	11.31	603.465							2022-08-21 15:50:53	0.167	0.053	433.164
2022-08-16 13:04:46	67.926	10.951	604.038							2022-08-21 15:50:54	0.167	0.05	433.164
2022-08-16 13:04:47	51.168	10.562	603.752							2022-08-21 15:50:55	0.167	0.049	433.307
2022-08-16 13:04:48	46.045	9.978	567.974							2022-08-21 15:50:56	0.16	0.049	433.307
2022-08-16 13:04:49	64.359	9.434	567.831							2022-08-21 15:50:57	0.167	0.049	433.307
2022-08-16 13:04:50	97.12	9.045	549.227							2022-08-21 15:50:58	0.16	0.048	433.164
2022-08-16 13:04:51	127.503	8.861	550.085							2022-08-21 15:50:59	0.16	0.05	433.164
2022-08-16 13:04:52	132.899	8.851	550.371							2022-08-21 15:51:00	0.167	0.049	432.734
2022-08-16 13:04:53	136.219	8.855	551.087							2022-08-21 15:51:01	0.16	0.048	431.876
2022-08-16 13:04:54	143.88	8.865	553.377							2022-08-21 15:51:02	0.16	0.048	432.877
2022-08-16 13:04:55	155.962	9.03	553.663							2022-08-21 15:51:03	0.16	0.046	432.591
2022-08-16 13:04:56	153.397	9.22	566.4							2022-08-21 15:51:04	0.16	0.048	432.877
2022-08-16 13:04:57	142.15	9.4	569.548							2022-08-21 15:51:05	0.16	0.046	432.877
2022-08-16 13:04:58	122.767	9.446	569.405							2022-08-21 15:51:06	0.167	0.045	432.877
2022-08-16 13:04:59	100.159	9.479	586.006							2022-08-21 15:51:07	0.16	0.043	433.021
2022-08-16 13:05:00	93.587	9.422	567.831							2022-08-21 15:51:08	0.167	0.043	432.448
2022-08-16 13:05:01	105.709	9.256	567.974							2022-08-21 15:51:09	0.16	0.043	432.877
2022-08-16 13:05:02	120.396	9.225	552.232							2022-08-21 15:51:10	0.16	0.043	432.734
2022-08-16 13:05:03	99.531	9.185	552.947							2022-08-21 15:51:11	0.16	0.043	433.307
2022-08-16 13:05:04	98.001	9.033	568.976							2022-08-21 15:51:12	0.16	0.042	433.45
2022-08-16 13:05:05	115.407	8.879	589.011							2022-08-21 15:51:13	0.16	0.043	433.307
2022-08-16 13:05:06	129.039	8.865	587.866							2022-08-21 15:51:14	0.154	0.042	433.164
2022-08-16 13:05:07	133.273	8.87	586.435							2022-08-21 15:51:15	0.16	0.042	433.164
2022-08-16 13:05:08	122.24	8.895	586.292							2022-08-21 15:51:16	0.16	0.043	433.45
2022-08-16 13:05:09	113.57	8.943	585.004							2022-08-21 15:51:17	0.16	0.043	433.45
2022-08-16 13:05:10	101.755	8.886	567.974							2022-08-21 15:51:18	0.154	0.043	433.307
2022-08-16 13:05:11	87.869	8.859	568.26							2022-08-21 15:51:19	0.154	0.042	433.736
2022-08-16 13:05:12	67.926	8.828	565.541							2022-08-21 15:51:20	0.154	0.042	433.021
2022-08-16 13:05:13	61.868	8.499	550.085							2022-08-21 15:51:21	0.154	0.043	433.307
2022-08-16 13:05:14	54.895	8.28	549.799							2022-08-21 15:51:22	0.154	0.042	432.734
2022-08-16 13:05:15	89.573	7.931	537.062							2022-08-21 15:51:23	0.154	0.042	433.164
2022-08-16 13:05:16	160.21	7.894	549.227							2022-08-21 15:51:24	0.154	0.042	433.021
2022-08-16 13:05:17	203.604	8.087	549.799							2022-08-21 15:51:25	0.154	0.04	432.877
2022-08-16 13:05:18	230.447	8.485	553.806							2022-08-21 15:51:26	0.147	0.042	433.021
2022-08-16 13:05:19	209.882	9.001	554.092							2022-08-21 15:51:27	0.154	0.042	433.164
2022-08-16 13:05:20	179.96	9.446	584.575							2022-08-21 15:51:28	0.147	0.04	433.307
2022-08-16 13:05:21	155.855	9.829	606.185							2022-08-21 15:51:29	0.154	0.039	433.021
2022-08-16 13:05:22	143.245	10.153	606.9							2022-08-21 15:51:30	0.147	0.04	432.877
2022-08-16 13:05:23	136.252	10.248	603.465							2022-08-21 15:51:31	0.154	0.039	433.307
2022-08-16 13:05:24	104.2	10.368	587.294							2022-08-21 15:51:32	0.154	0.039	433.307
2022-08-16 13:05:25	84.937	10.19	587.294							2022-08-21 15:51:33	0.154	0.04	433.307
2022-08-16 13:05:26	88.798	9.991	570.55							2022-08-21 15:51:34	0.147	0.037	433.307
2022-08-16 13:05:27	122.226	9.795	570.264							2022-08-21 15:51:35	0.147	0.036	433.021
2022-08-16 13:05:28	124.951	9.63	567.402							2022-08-21 15:51:36	0.147	0.036	433.307
2022-08-16 13:05:29	145.863	9.617	602.607
2022-08-16 13:05:30	175.906	9.647	600.46
2022-08-16 13:05:31	180.267	9.844	619.923
2022-08-16 13:05:32	148.582	10.048	621.068
2022-08-16 13:05:33	109.423	10.178	620.496
2022-08-16 13:05:34	109.429	10.156	622.499
2022-08-16 13:05:35	155.989	10.022	622.356
2022-08-16 13:05:36	198.768	10.175	607.329
2022-08-16 13:05:37	230.453	10.57	605.04
2022-08-16 13:05:38	230.467	11.119	604.897
2022-08-16 13:05:39	230.46	11.722	626.649
2022-08-16 13:05:40	230.46	12.375	661.282
2022-08-16 13:05:41	230.453	13.097	661.568
2022-08-16 13:05:42	230.433	13.706	694.341
2022-08-16 13:05:43	230.433	14.229	714.949
2022-08-16 13:05:44	230.433	14.624	714.663
2022-08-16 13:05:45	202.902	14.82	716.523
2022-08-16 13:05:46	152.997	14.854	716.523
2022-08-16 13:05:47	105.161	14.817	729.689
2022-08-16 13:05:48	124.724	14.469	714.09
2022-08-16 13:05:49	172.519	14.242	714.519
2022-08-16 13:05:50	207.177	14.062	697.06
2022-08-16 13:05:51	230.433	14.068	715.235
2022-08-16 13:05:52	230.447	14.255	714.806
2022-08-16 13:05:53	182.905	14.432	731.836
2022-08-16 13:05:54	147.446	14.431	731.836
2022-08-16 13:05:55	124.851	14.24	695.629
2022-08-16 13:05:56	138.116	13.903	659.994
2022-08-16 13:05:57	169.04	13.686	660.28
2022-08-16 13:05:58	152.683	13.505	655.415
2022-08-16 13:05:59	115.414	13.245	642.249
2022-08-16 13:06:00	79.487	12.892	642.249
2022-08-16 13:06:01	59.17	12.347	619.923
2022-08-16 13:06:02	59.377	11.735	583.716
2022-08-16 13:06:03	88.764	11.185	583.287
2022-08-16 13:06:04	113.61	10.764	587.58
2022-08-16 13:06:05	122.34	10.529	586.292
2022-08-16 13:06:06	103.839	10.164	602.034
2022-08-16 13:06:07	103.151	9.892	566.257
2022-08-16 13:06:08	115.501	9.638	566.4
2022-08-16 13:06:09	122.934	9.526	536.919
2022-08-16 13:06:10	123.716	9.419	539.495
2022-08-16 13:06:11	129.293	9.391	549.37
2022-08-16 13:06:12	123.095	9.263	551.087
2022-08-16 13:06:13	147.4	9.243	550.944
2022-08-16 13:06:14	212.447	9.412	552.089
2022-08-16 13:06:15	230.453	9.788	559.101
2022-08-16 13:06:16	234.053	10.56	564.682
2022-08-16 13:06:17	243.063	11.511	622.642
2022-08-16 13:06:18	243.791	12.565	673.447
2022-08-16 13:06:19	236.545	13.888	663.715
2022-08-16 13:06:20	230.473	14.821	696.487
2022-08-16 13:06:21	230.453	15.556	716.094
2022-08-16 13:06:22	230.44	15.978	716.38
2022-08-16 13:06:23	227.288	16.358	731.979
2022-08-16 13:06:24	226.96	16.672	731.836
2022-08-16 13:06:25	208.252	16.719	733.267
2022-08-16 13:06:26	196.851	16.716	734.412
2022-08-16 13:06:27	205.407	16.56	734.841
2022-08-16 13:06:28	230.467	16.554	744.573
2022-08-16 13:06:29	237.259	16.904	738.419
2022-08-16 13:06:30	236.531	17.328	768.901
2022-08-16 13:06:31	231.375	17.916	788.651
2022-08-16 13:06:32	230.447	18.309	788.651
2022-08-16 13:06:33	205.561	18.487	767.184
2022-08-16 13:06:34	198.534	18.413	733.696
2022-08-16 13:06:35	160.905	18.139	733.696
2022-08-16 13:06:36	144.848	17.744	716.523
2022-08-16 13:06:37	107.492	17.288	696.917
2022-08-16 13:06:38	74.859	16.645	697.06
2022-08-16 13:06:39	52.711	15.625	675.736
2022-08-16 13:06:40	47.054	14.817	675.88
2022-08-16 13:06:41	73.743	14.034	643.536
2022-08-16 13:06:42	90.975	13.098	640.388
2022-08-16 13:06:43	92.872	12.402	639.672
2022-08-16 13:06:44	137.147	11.931	625.075
2022-08-16 13:06:45	185.283	11.54	606.042
2022-08-16 13:06:46	222.098	11.527	606.471
2022-08-16 13:06:47	230.447	11.717	584.146
2022-08-16 13:06:48	230.427	12.13	579.423
2022-08-16 13:06:49	188.876	12.353	588.439
2022-08-16 13:06:50	136.239	12.525	592.303
2022-08-16 13:06:51	103.999	12.369	601.033
2022-08-16 13:06:52	124.05	12.157	587.008
2022-08-16 13:06:53	152.449	11.965	569.548
2022-08-16 13:06:54	194.681	11.823	570.407
2022-08-16 13:06:55	210.51	11.962	623.072
2022-08-16 13:06:56	200.057	12.14	622.642
2022-08-16 13:06:57	187.173	12.195	659.279
2022-08-16 13:06:58	163.089	12.344	659.994
2022-08-16 13:06:59	137.461	12.342	660.137
2022-08-16 13:07:00	112.709	12.169	661.282
2022-08-16 13:07:01	109.897	11.964	643.966
2022-08-16 13:07:02	136.159	11.707	643.393
2022-08-16 13:07:03	150.058	11.518	627.222
2022-08-16 13:07:04	117.925	11.343	622.499
2022-08-16 13:07:05	80.636	11.133	622.356
2022-08-16 13:07:06	54.868	10.753	606.328
2022-08-16 13:07:07	38.438	10.159	588.296
2022-08-16 13:07:08	31.545	9.592	587.866
2022-08-16 13:07:09	55.797	9.012	568.546
2022-08-16 13:07:10	112.014	8.66	568.69
2022-08-16 13:07:11	164.177	8.473	550.801
2022-08-16 13:07:12	171.291	8.49	544.504
2022-08-16 13:07:13	161.479	8.668	544.075
2022-08-16 13:07:14	159.629	8.845	548.511
2022-08-16 13:07:15	183.647	8.891	548.368
2022-08-16 13:07:16	217.857	9.237	549.083
2022-08-16 13:07:17	222.719	9.635	567.974
2022-08-16 13:07:18	223.895	10.172	567.831
2022-08-16 13:07:19	221.23	10.753	604.038
2022-08-16 13:07:20	205.38	11.148	617.061
2022-08-16 13:07:21	192.249	11.52	617.347
2022-08-16 13:07:22	180.641	11.745	624.503
2022-08-16 13:07:23	169.347	11.967	644.252
2022-08-16 13:07:24	155.795	12.111	644.252
2022-08-16 13:07:25	166.635	12.13	673.447
2022-08-16 13:07:26	183.72	12.143	663.429
2022-08-16 13:07:27	188.502	12.164	676.595
2022-08-16 13:07:28	196.804	12.33	678.169
2022-08-16 13:07:29	216.768	12.51	678.169
2022-08-16 13:07:30	228.784	12.711	681.318
2022-08-16 13:07:31	200.184	12.92	681.031
2022-08-16 13:07:32	146.986	13.085	695.486
2022-08-16 13:07:33	161.479	12.965	677.597
2022-08-16 13:07:34	189.07	12.932	677.311
2022-08-16 13:07:35	200.291	12.963	658.706
2022-08-16 13:07:36	196.01	13.103	659.422
2022-08-16 13:07:37	191.668	13.128	658.849
2022-08-16 13:07:38	186.372	13.302	658.992
2022-08-16 13:07:39	178.083	13.333	659.708
2022-08-16 13:07:40	161.152	13.321	659.565
2022-08-16 13:07:41	153.478	13.138	659.994
2022-08-16 13:07:42	182.825	13.095	660.424
2022-08-16 13:07:43	229.545	13.101	660.71
2022-08-16 13:07:44	230.447	13.41	660.996
2022-08-16 13:07:45	230.467	13.854	660.853
2022-08-16 13:07:46	230.447	14.358	675.164
2022-08-16 13:07:47	180.381	14.636	678.456
2022-08-16 13:07:48	122.327	14.642	677.74
2022-08-16 13:07:49	116.202	14.44	675.593
2022-08-16 13:07:50	120.483	14.068	675.45
2022-08-16 13:07:51	183.086	13.782	660.853
2022-08-16 13:07:52	213.93	13.678	661.712
2022-08-16 13:07:53	167.751	13.673	661.282
2022-08-16 13:07:54	124.885	13.499	662.57
2022-08-16 13:07:55	89.76	13.103	643.536
2022-08-16 13:07:56	61.721	12.617	643.25
2022-08-16 13:07:57	44.362	12.063	623.644
2022-08-16 13:07:58	80.89	11.49	606.757
2022-08-16 13:07:59	171.738	10.963	606.614
2022-08-16 13:08:00	230.44	10.94	599.029
2022-08-16 13:08:01	230.46	11.144	599.458
2022-08-16 13:08:02	230.447	11.681	604.181
2022-08-16 13:08:03	230.46	12.166	606.9
2022-08-16 13:08:04	230.44	12.726	606.042
2022-08-16 13:08:05	182.718	13.109	623.787
2022-08-16 13:08:06	144.541	13.314	640.531
2022-08-16 13:08:07	144.094	13.283	640.245
2022-08-16 13:08:08	154.499	13.101	622.929
2022-08-16 13:08:09	175.245	12.941	605.898
2022-08-16 13:08:10	185.504	12.925	605.469
2022-08-16 13:08:11	224.476	12.941	640.96
2022-08-16 13:08:12	225.411	13.125	640.531
2022-08-16 13:08:13	225.444	13.49	675.021
2022-08-16 13:08:14	230.447	13.698	696.631
2022-08-16 13:08:15	230.42	14.062	696.774
2022-08-16 13:08:16	227.094	14.408	728.115
2022-08-16 13:08:17	223.594	14.615	725.682
2022-08-16 13:08:18	214.497	14.794	710.226
2022-08-16 13:08:19	189.144	14.817	696.058
2022-08-16 13:08:20	170.309	14.815	696.058
2022-08-16 13:08:21	199.409	14.803	696.917
2022-08-16 13:08:22	189.397	14.793	697.632
2022-08-16 13:08:23	160.163	14.647	697.632
2022-08-16 13:08:24	139.652	14.454	697.919
2022-08-16 13:08:25	123.275	14.238	698.634
2022-08-16 13:08:26	114.646	13.862	698.777
2022-08-16 13:08:27	108.488	13.467	678.885
2022-08-16 13:08:28	91.997	12.899	659.279
2022-08-16 13:08:29	97.454	12.356	659.279
2022-08-16 13:08:30	119.762	11.958	640.388
2022-08-16 13:08:31	132.452	11.656	640.531
2022-08-16 13:08:32	107.319	11.329	621.784
2022-08-16 13:08:33	80.556	10.966	621.641
2022-08-16 13:08:34	57.44	10.57	599.458
2022-08-16 13:08:35	40.896	9.987	565.684
2022-08-16 13:08:36	33.228	9.416	566.114
2022-08-16 13:08:37	33.168	8.859	536.633
2022-08-16 13:08:38	28.88	8.445	514.451
2022-08-16 13:08:39	24.365	7.87	514.307
2022-08-16 13:08:40	20.137	7.148	497.707
2022-08-16 13:08:41	25.213	6.602	479.388
2022-08-16 13:08:42	36.648	6.19	479.388
2022-08-16 13:08:43	40.061	5.764	477.099
2022-08-16 13:08:44	36.601	5.524	475.668
2022-08-16 13:08:45	38.819	5.17	475.668
2022-08-16 13:08:46	61.868	4.961	459.496
2022-08-16 13:08:47	88.658	4.793	458.924
2022-08-16 13:08:48	94.455	4.793	456.777
2022-08-16 13:08:49	105.596	4.818	459.353
2022-08-16 13:08:50	111.132	4.992	458.924
2022-08-16 13:08:51	98.943	5.176	474.523
2022-08-16 13:08:52	78.766	5.348	475.238
2022-08-16 13:08:53	76.375	5.369	477.099
2022-08-16 13:08:54	113.544	5.458	478.673
2022-08-16 13:08:55	172.66	5.706	479.532
2022-08-16 13:08:56	196.778	6.043	513.449
2022-08-16 13:08:57	199.596	6.59	548.368
2022-08-16 13:08:58	194.787	7.178	548.225
2022-08-16 13:08:59	160.871	7.897	555.094
2022-08-16 13:09:00	111.046	8.273	583.287
2022-08-16 13:09:01	73.042	8.427	577.133
2022-08-16 13:09:02	54.835	8.294	568.69
2022-08-16 13:09:03	56.972	8.099	568.546
2022-08-16 13:09:04	67.926	7.891	566.4
2022-08-16 13:09:05	77.263	7.68	553.234
2022-08-16 13:09:06	74.538	7.489	552.089
2022-08-16 13:09:07	94.809	7.154	550.801
2022-08-16 13:09:08	105.796	7.134	553.09
2022-08-16 13:09:09	106.511	7.128	553.949
2022-08-16 13:09:10	106.731	7.134	567.115
2022-08-16 13:09:11	89.359	7.135	567.258
2022-08-16 13:09:12	73.703	7.122	548.368
2022-08-16 13:09:13	53.686	6.954	529.477
2022-08-16 13:09:14	38.304	6.761	529.191
2022-08-16 13:09:15	33.288	6.545	510.873
2022-08-16 13:09:16	62.736	6.196	478.959
2022-08-16 13:09:17	104.781	6.027	478.53
2022-08-16 13:09:18	133.3	6.155	497.85
2022-08-16 13:09:19	138.029	6.22	515.023
2022-08-16 13:09:20	138.229	6.556	514.88
2022-08-16 13:09:21	146.491	6.768	529.763
2022-08-16 13:09:22	117.912	7	530.193
2022-08-16 13:09:23	80.502	7.172	532.912
2022-08-16 13:09:24	53.679	7.168	517.456
2022-08-16 13:09:25	36.661	7.107	518.171
2022-08-16 13:09:26	26.008	6.777	511.588
2022-08-16 13:09:27	71.786	6.559	512.447
2022-08-16 13:09:28	158.62	6.406	512.018
2022-08-16 13:09:29	230.427	6.753	513.163
2022-08-16 13:09:30	230.46	7.495	543.502
2022-08-16 13:09:31	230.44	8.282	550.944
2022-08-16 13:09:32	230.44	8.919	605.326
2022-08-16 13:09:33	228.79	9.663	605.326
2022-08-16 13:09:34	221.196	10.507	619.208
2022-08-16 13:09:35	198.561	11.098	623.93
2022-08-16 13:09:36	187.167	11.506	624.073
2022-08-16 13:09:37	191.862	11.762	624.932
2022-08-16 13:09:38	191.955	12.139	624.503
2022-08-16 13:09:39	185.524	12.342	625.648
2022-08-16 13:09:40	175.111	12.532	656.846
2022-08-16 13:09:41	196.831	12.708	656.846
2022-08-16 13:09:42	204.919	12.896	677.454
2022-08-16 13:09:43	230.433	13.095	697.632
2022-08-16 13:09:44	230.44	13.519	697.203
2022-08-16 13:09:45	215.386	13.984	729.403
2022-08-16 13:09:46	172.66	14.227	696.201
2022-08-16 13:09:47	152.035	14.248	696.487
2022-08-16 13:09:48	174.283	14.224	661.712
2022-08-16 13:09:49	186.265	14.095	661.712
2022-08-16 13:09:50	230.44	14.223	660.424
2022-08-16 13:09:51	230.467	14.435	659.708
2022-08-16 13:09:52	230.44	14.811	660.137
2022-08-16 13:09:53	196.764	15.002	660.28
2022-08-16 13:09:54	158.874	15.054	660.137
2022-08-16 13:09:55	136.994	14.992	661.139
2022-08-16 13:09:56	114.111	14.811	655.272
2022-08-16 13:09:57	94.482	14.441	656.416
2022-08-16 13:09:58	86.193	14.016	640.817
2022-08-16 13:09:59	94.428	13.471	607.186
2022-08-16 13:10:00	91.049	12.873	606.9
2022-08-16 13:10:01	86.914	12.336	568.976
2022-08-16 13:10:02	112.041	11.803	568.976
2022-08-16 13:10:03	124.684	11.517	569.262
2022-08-16 13:10:04	148.315	11.316	569.548
2022-08-16 13:10:05	163.135	11.15	568.833
2022-08-16 13:10:06	171.658	11.147	568.976
2022-08-16 13:10:07	155.515	11.222	567.545
2022-08-16 13:10:08	134.362	11.294	567.974
2022-08-16 13:10:09	127.416	11.153	551.373
2022-08-16 13:10:10	119.548	11.129	548.225
2022-08-16 13:10:11	111.246	10.951	548.225
2022-08-16 13:10:12	105.983	10.764	548.94
2022-08-16 13:10:13	100.553	10.57	549.083
2022-08-16 13:10:14	99.317	10.224	550.085
2022-08-16 13:10:15	89.633	10.002	549.656
2022-08-16 13:10:16	74.104	9.783	549.799
2022-08-16 13:10:17	64.246	9.425	550.085
2022-08-16 13:10:18	59.096	9.053	547.366
2022-08-16 13:10:19	65.167	8.842	547.366
2022-08-16 13:10:20	78.045	8.488	531.91
2022-08-16 13:10:21	99.778	8.283	531.051
2022-08-16 13:10:22	133.507	8.115	531.051
2022-08-16 13:10:23	170.943	8.256	530.622
2022-08-16 13:10:24	143.933	8.458	530.622
2022-08-16 13:10:25	98.262	8.499	533.198
2022-08-16 13:10:26	67.999	8.49	546.937
2022-08-16 13:10:27	64.379	8.396	547.223
2022-08-16 13:10:28	72.948	8.117	533.914
2022-08-16 13:10:29	78.919	7.942	531.624
2022-08-16 13:10:30	73.009	7.746	531.481
2022-08-16 13:10:31	75.299	7.659	532.053
2022-08-16 13:10:32	72.942	7.474	532.483
2022-08-16 13:10:33	84.203	7.15	532.196
2022-08-16 13:10:34	119.615	7.132	549.083
2022-08-16 13:10:35	147.313	7.151	549.227
2022-08-16 13:10:36	176.787	7.52	555.237
2022-08-16 13:10:37	175.318	7.885	567.974
2022-08-16 13:10:38	150.973	8.249	567.831
2022-08-16 13:10:39	112.963	8.479	570.836
2022-08-16 13:10:40	84.196	8.591	570.693
2022-08-16 13:10:41	57.921	8.484	553.52
2022-08-16 13:10:42	40.902	8.288	546.507
2022-08-16 13:10:43	30.71	7.991	547.08
2022-08-16 13:10:44	56.825	7.662	532.483
2022-08-16 13:10:45	230.44	7.518	529.907
2022-08-16 13:10:46	230.473	8.008	529.62
2022-08-16 13:10:47	230.46	8.827	566.4
2022-08-16 13:10:48	216.24	9.464	607.186
2022-08-16 13:10:49	155.501	10.036	607.329
2022-08-16 13:10:50	132.472	10.538	602.75
2022-08-16 13:10:51	124.537	10.593	583.716
2022-08-16 13:10:52	126.321	10.731	571.266
2022-08-16 13:10:53	148.408	10.738	567.974
[truncated: 3,201 more rows]
